# Supplementary material for: Synthesis of silver nanoparticles using a modified Tollens’ method in conjunction with phytochemicals and assessment of their antimicrobial activity
Source: PeerJ. 2019 Feb 8;7:e6413. doi: 10.7717/peerj.6413 (PMC6369825; doi:10.7717/peerj.6413)
Supplement: Supplemental Information 1 [file peerj-07-6413-s001.xlsx]

## Sheet: Dosage
OLE											RME
20 mg/l		100 mg/l		250 mg/l							20 mg/l		100 mg/l		250 mg/l
Wavelength nm.	Abs.	Wavelength nm.	Abs.	Wavelength nm.	Abs.						Wavelength nm.	Abs.	Wavelength nm.	Abs.	Wavelength nm.	Abs.
300	0.09	300	0.127	300	0.248						300	0.103	300	0.146	300	0.233
300.2	0.09	300.2	0.127	300.2	0.248						300.2	0.103	300.2	0.145	300.2	0.232
300.4	0.089	300.4	0.127	300.4	0.247						300.4	0.102	300.4	0.145	300.4	0.231
300.6	0.089	300.6	0.126	300.6	0.245						300.6	0.102	300.6	0.144	300.6	0.23
300.8	0.088	300.8	0.125	300.8	0.244						300.8	0.101	300.8	0.143	300.8	0.229
301	0.088	301	0.124	301	0.242						301	0.1	301	0.142	301	0.228
301.2	0.087	301.2	0.123	301.2	0.241						301.2	0.1	301.2	0.141	301.2	0.226
301.4	0.086	301.4	0.122	301.4	0.24						301.4	0.099	301.4	0.14	301.4	0.225
301.6	0.086	301.6	0.121	301.6	0.238						301.6	0.098	301.6	0.139	301.6	0.224
301.8	0.085	301.8	0.12	301.8	0.237						301.8	0.098	301.8	0.138	301.8	0.223
302	0.084	302	0.119	302	0.235						302	0.097	302	0.137	302	0.221
302.2	0.083	302.2	0.118	302.2	0.234						302.2	0.097	302.2	0.136	302.2	0.22
302.4	0.083	302.4	0.118	302.4	0.232						302.4	0.096	302.4	0.135	302.4	0.219
302.6	0.082	302.6	0.117	302.6	0.231						302.6	0.096	302.6	0.134	302.6	0.217
302.8	0.082	302.8	0.116	302.8	0.23						302.8	0.095	302.8	0.134	302.8	0.216
303	0.081	303	0.115	303	0.228						303	0.094	303	0.133	303	0.215
303.2	0.081	303.2	0.114	303.2	0.227						303.2	0.094	303.2	0.132	303.2	0.214
303.4	0.08	303.4	0.113	303.4	0.225						303.4	0.093	303.4	0.131	303.4	0.213
303.6	0.079	303.6	0.113	303.6	0.224						303.6	0.092	303.6	0.13	303.6	0.212
303.8	0.079	303.8	0.112	303.8	0.223						303.8	0.092	303.8	0.129	303.8	0.211
304	0.078	304	0.112	304	0.222						304	0.092	304	0.129	304	0.21
304.2	0.078	304.2	0.111	304.2	0.22						304.2	0.091	304.2	0.128	304.2	0.209
304.4	0.078	304.4	0.11	304.4	0.219						304.4	0.091	304.4	0.127	304.4	0.208
304.6	0.077	304.6	0.109	304.6	0.218						304.6	0.09	304.6	0.126	304.6	0.206
304.8	0.077	304.8	0.108	304.8	0.217						304.8	0.089	304.8	0.125	304.8	0.205
305	0.076	305	0.108	305	0.216						305	0.089	305	0.125	305	0.204
305.2	0.076	305.2	0.107	305.2	0.214						305.2	0.088	305.2	0.124	305.2	0.203
305.4	0.076	305.4	0.107	305.4	0.214						305.4	0.088	305.4	0.123	305.4	0.202
305.6	0.075	305.6	0.106	305.6	0.212						305.6	0.088	305.6	0.122	305.6	0.201
305.8	0.074	305.8	0.105	305.8	0.211						305.8	0.087	305.8	0.121	305.8	0.2
306	0.073	306	0.104	306	0.209						306	0.086	306	0.12	306	0.199
306.2	0.072	306.2	0.103	306.2	0.208						306.2	0.085	306.2	0.118	306.2	0.197
306.4	0.072	306.4	0.102	306.4	0.206						306.4	0.085	306.4	0.118	306.4	0.197
306.6	0.071	306.6	0.102	306.6	0.205						306.6	0.085	306.6	0.117	306.6	0.196
306.8	0.071	306.8	0.101	306.8	0.204						306.8	0.084	306.8	0.117	306.8	0.195
307	0.071	307	0.1	307	0.203						307	0.084	307	0.116	307	0.193
307.2	0.07	307.2	0.1	307.2	0.202						307.2	0.084	307.2	0.116	307.2	0.193
307.4	0.07	307.4	0.099	307.4	0.201						307.4	0.083	307.4	0.115	307.4	0.191
307.6	0.069	307.6	0.098	307.6	0.2						307.6	0.083	307.6	0.114	307.6	0.191
307.8	0.069	307.8	0.098	307.8	0.199						307.8	0.082	307.8	0.114	307.8	0.19
308	0.069	308	0.097	308	0.198						308	0.082	308	0.113	308	0.189
308.2	0.068	308.2	0.097	308.2	0.197						308.2	0.082	308.2	0.112	308.2	0.188
308.4	0.068	308.4	0.096	308.4	0.196						308.4	0.081	308.4	0.112	308.4	0.187
308.6	0.067	308.6	0.095	308.6	0.195						308.6	0.081	308.6	0.111	308.6	0.186
308.8	0.067	308.8	0.094	308.8	0.193						308.8	0.08	308.8	0.11	308.8	0.186
309	0.066	309	0.094	309	0.193						309	0.08	309	0.11	309	0.185
309.2	0.066	309.2	0.093	309.2	0.192						309.2	0.079	309.2	0.109	309.2	0.184
309.4	0.065	309.4	0.093	309.4	0.191						309.4	0.079	309.4	0.108	309.4	0.183
309.6	0.065	309.6	0.092	309.6	0.19						309.6	0.078	309.6	0.108	309.6	0.182
309.8	0.064	309.8	0.091	309.8	0.189						309.8	0.078	309.8	0.107	309.8	0.181
310	0.064	310	0.091	310	0.188						310	0.077	310	0.106	310	0.18
310.2	0.064	310.2	0.09	310.2	0.187						310.2	0.077	310.2	0.105	310.2	0.179
310.4	0.063	310.4	0.09	310.4	0.186						310.4	0.077	310.4	0.105	310.4	0.178
310.6	0.063	310.6	0.089	310.6	0.185						310.6	0.076	310.6	0.104	310.6	0.178
310.8	0.062	310.8	0.089	310.8	0.184						310.8	0.076	310.8	0.104	310.8	0.177
311	0.062	311	0.088	311	0.183						311	0.075	311	0.103	311	0.176
311.2	0.061	311.2	0.088	311.2	0.182						311.2	0.075	311.2	0.103	311.2	0.175
311.4	0.061	311.4	0.087	311.4	0.181						311.4	0.074	311.4	0.102	311.4	0.174
311.6	0.061	311.6	0.087	311.6	0.18						311.6	0.074	311.6	0.101	311.6	0.174
311.8	0.061	311.8	0.086	311.8	0.179						311.8	0.074	311.8	0.101	311.8	0.173
312	0.06	312	0.086	312	0.179						312	0.074	312	0.1	312	0.172
312.2	0.06	312.2	0.085	312.2	0.178						312.2	0.073	312.2	0.1	312.2	0.172
312.4	0.06	312.4	0.085	312.4	0.177						312.4	0.073	312.4	0.099	312.4	0.171
312.6	0.059	312.6	0.085	312.6	0.177						312.6	0.073	312.6	0.099	312.6	0.17
312.8	0.059	312.8	0.084	312.8	0.176						312.8	0.072	312.8	0.098	312.8	0.17
313	0.059	313	0.084	313	0.175						313	0.072	313	0.098	313	0.17
313.2	0.058	313.2	0.084	313.2	0.175						313.2	0.072	313.2	0.098	313.2	0.169
313.4	0.058	313.4	0.083	313.4	0.174						313.4	0.072	313.4	0.098	313.4	0.169
313.6	0.058	313.6	0.083	313.6	0.174						313.6	0.072	313.6	0.097	313.6	0.169
313.8	0.058	313.8	0.083	313.8	0.173						313.8	0.071	313.8	0.097	313.8	0.168
314	0.057	314	0.082	314	0.172						314	0.071	314	0.096	314	0.167
314.2	0.057	314.2	0.082	314.2	0.172						314.2	0.071	314.2	0.096	314.2	0.167
314.4	0.057	314.4	0.081	314.4	0.171						314.4	0.07	314.4	0.096	314.4	0.166
314.6	0.057	314.6	0.081	314.6	0.171						314.6	0.07	314.6	0.095	314.6	0.166
314.8	0.057	314.8	0.081	314.8	0.17						314.8	0.07	314.8	0.095	314.8	0.165
315	0.056	315	0.081	315	0.17						315	0.07	315	0.095	315	0.165
315.2	0.056	315.2	0.08	315.2	0.169						315.2	0.069	315.2	0.094	315.2	0.164
315.4	0.056	315.4	0.08	315.4	0.169						315.4	0.069	315.4	0.094	315.4	0.164
315.6	0.056	315.6	0.08	315.6	0.168						315.6	0.069	315.6	0.094	315.6	0.164
315.8	0.055	315.8	0.079	315.8	0.168						315.8	0.069	315.8	0.094	315.8	0.163
316	0.055	316	0.079	316	0.168						316	0.069	316	0.093	316	0.163
316.2	0.055	316.2	0.079	316.2	0.167						316.2	0.069	316.2	0.093	316.2	0.163
316.4	0.055	316.4	0.079	316.4	0.167						316.4	0.069	316.4	0.093	316.4	0.162
316.6	0.055	316.6	0.079	316.6	0.167						316.6	0.069	316.6	0.093	316.6	0.162
316.8	0.054	316.8	0.078	316.8	0.166						316.8	0.069	316.8	0.092	316.8	0.162
317	0.054	317	0.078	317	0.166						317	0.069	317	0.092	317	0.162
317.2	0.054	317.2	0.078	317.2	0.165						317.2	0.068	317.2	0.092	317.2	0.161
317.4	0.054	317.4	0.077	317.4	0.165						317.4	0.068	317.4	0.092	317.4	0.161
317.6	0.054	317.6	0.077	317.6	0.165						317.6	0.068	317.6	0.091	317.6	0.161
317.8	0.054	317.8	0.077	317.8	0.165						317.8	0.067	317.8	0.091	317.8	0.16
318	0.054	318	0.077	318	0.165						318	0.067	318	0.091	318	0.16
318.2	0.053	318.2	0.077	318.2	0.164						318.2	0.067	318.2	0.091	318.2	0.16
318.4	0.053	318.4	0.077	318.4	0.164						318.4	0.067	318.4	0.091	318.4	0.16
318.6	0.053	318.6	0.077	318.6	0.164						318.6	0.067	318.6	0.09	318.6	0.16
318.8	0.053	318.8	0.077	318.8	0.164						318.8	0.067	318.8	0.09	318.8	0.16
319	0.053	319	0.077	319	0.164						319	0.067	319	0.09	319	0.16
319.2	0.053	319.2	0.076	319.2	0.164						319.2	0.067	319.2	0.09	319.2	0.16
319.4	0.053	319.4	0.076	319.4	0.164						319.4	0.067	319.4	0.09	319.4	0.16
319.6	0.053	319.6	0.076	319.6	0.163						319.6	0.067	319.6	0.09	319.6	0.16
319.8	0.052	319.8	0.076	319.8	0.163						319.8	0.067	319.8	0.09	319.8	0.16
320	0.052	320	0.076	320	0.164						320	0.067	320	0.091	320	0.16
320.2	0.052	320.2	0.076	320.2	0.163						320.2	0.067	320.2	0.091	320.2	0.159
320.4	0.052	320.4	0.076	320.4	0.163						320.4	0.067	320.4	0.091	320.4	0.159
320.6	0.052	320.6	0.076	320.6	0.163						320.6	0.067	320.6	0.091	320.6	0.159
320.8	0.052	320.8	0.076	320.8	0.163						320.8	0.067	320.8	0.091	320.8	0.159
321	0.052	321	0.076	321	0.164						321	0.067	321	0.091	321	0.159
321.2	0.052	321.2	0.076	321.2	0.164						321.2	0.067	321.2	0.091	321.2	0.159
321.4	0.052	321.4	0.076	321.4	0.164						321.4	0.067	321.4	0.091	321.4	0.16
321.6	0.052	321.6	0.076	321.6	0.164						321.6	0.067	321.6	0.091	321.6	0.16
321.8	0.053	321.8	0.076	321.8	0.164						321.8	0.067	321.8	0.091	321.8	0.16
322	0.052	322	0.076	322	0.164						322	0.067	322	0.091	322	0.16
322.2	0.053	322.2	0.077	322.2	0.164						322.2	0.067	322.2	0.091	322.2	0.16
322.4	0.053	322.4	0.077	322.4	0.165						322.4	0.067	322.4	0.091	322.4	0.16
322.6	0.053	322.6	0.077	322.6	0.165						322.6	0.068	322.6	0.091	322.6	0.16
322.8	0.053	322.8	0.077	322.8	0.165						322.8	0.068	322.8	0.091	322.8	0.161
323	0.053	323	0.077	323	0.166						323	0.068	323	0.092	323	0.161
323.2	0.053	323.2	0.077	323.2	0.166						323.2	0.068	323.2	0.092	323.2	0.161
323.4	0.053	323.4	0.077	323.4	0.166						323.4	0.068	323.4	0.092	323.4	0.162
323.6	0.053	323.6	0.078	323.6	0.166						323.6	0.068	323.6	0.093	323.6	0.162
323.8	0.053	323.8	0.078	323.8	0.167						323.8	0.068	323.8	0.093	323.8	0.162
324	0.053	324	0.078	324	0.168						324	0.069	324	0.093	324	0.163
324.2	0.053	324.2	0.078	324.2	0.168						324.2	0.069	324.2	0.094	324.2	0.163
324.4	0.053	324.4	0.078	324.4	0.168						324.4	0.069	324.4	0.094	324.4	0.163
324.6	0.053	324.6	0.078	324.6	0.169						324.6	0.069	324.6	0.094	324.6	0.164
324.8	0.053	324.8	0.079	324.8	0.169						324.8	0.069	324.8	0.094	324.8	0.164
325	0.054	325	0.079	325	0.17						325	0.069	325	0.094	325	0.164
325.2	0.054	325.2	0.079	325.2	0.17						325.2	0.07	325.2	0.095	325.2	0.165
325.4	0.054	325.4	0.08	325.4	0.171						325.4	0.07	325.4	0.095	325.4	0.165
325.6	0.054	325.6	0.08	325.6	0.171						325.6	0.07	325.6	0.096	325.6	0.166
325.8	0.054	325.8	0.08	325.8	0.172						325.8	0.07	325.8	0.096	325.8	0.166
326	0.055	326	0.081	326	0.173						326	0.07	326	0.096	326	0.167
326.2	0.055	326.2	0.081	326.2	0.173						326.2	0.071	326.2	0.097	326.2	0.168
326.4	0.055	326.4	0.081	326.4	0.174						326.4	0.071	326.4	0.097	326.4	0.168
326.6	0.055	326.6	0.082	326.6	0.174						326.6	0.071	326.6	0.098	326.6	0.169
326.8	0.055	326.8	0.082	326.8	0.175						326.8	0.072	326.8	0.098	326.8	0.169
327	0.056	327	0.083	327	0.176						327	0.072	327	0.098	327	0.169
327.2	0.056	327.2	0.083	327.2	0.176						327.2	0.072	327.2	0.099	327.2	0.17
327.4	0.056	327.4	0.083	327.4	0.177						327.4	0.072	327.4	0.099	327.4	0.171
327.6	0.056	327.6	0.083	327.6	0.178						327.6	0.073	327.6	0.1	327.6	0.171
327.8	0.056	327.8	0.084	327.8	0.179						327.8	0.073	327.8	0.1	327.8	0.172
328	0.057	328	0.084	328	0.179						328	0.073	328	0.1	328	0.173
328.2	0.057	328.2	0.085	328.2	0.18						328.2	0.073	328.2	0.101	328.2	0.173
328.4	0.057	328.4	0.085	328.4	0.181						328.4	0.074	328.4	0.102	328.4	0.174
328.6	0.057	328.6	0.086	328.6	0.182						328.6	0.074	328.6	0.103	328.6	0.175
328.8	0.058	328.8	0.086	328.8	0.183						328.8	0.075	328.8	0.104	328.8	0.175
329	0.058	329	0.087	329	0.184						329	0.075	329	0.105	329	0.176
329.2	0.059	329.2	0.087	329.2	0.185						329.2	0.076	329.2	0.105	329.2	0.177
329.4	0.06	329.4	0.088	329.4	0.186						329.4	0.076	329.4	0.106	329.4	0.178
329.6	0.06	329.6	0.089	329.6	0.187						329.6	0.077	329.6	0.107	329.6	0.179
329.8	0.06	329.8	0.089	329.8	0.188						329.8	0.077	329.8	0.107	329.8	0.18
330	0.061	330	0.09	330	0.189						330	0.078	330	0.108	330	0.181
330.2	0.061	330.2	0.091	330.2	0.19						330.2	0.078	330.2	0.109	330.2	0.182
330.4	0.062	330.4	0.091	330.4	0.192						330.4	0.079	330.4	0.109	330.4	0.183
330.6	0.062	330.6	0.092	330.6	0.193						330.6	0.079	330.6	0.11	330.6	0.184
330.8	0.063	330.8	0.093	330.8	0.194						330.8	0.08	330.8	0.111	330.8	0.185
331	0.063	331	0.094	331	0.195						331	0.08	331	0.112	331	0.186
331.2	0.064	331.2	0.095	331.2	0.196						331.2	0.081	331.2	0.113	331.2	0.187
331.4	0.064	331.4	0.096	331.4	0.197						331.4	0.081	331.4	0.114	331.4	0.188
331.6	0.064	331.6	0.096	331.6	0.199						331.6	0.082	331.6	0.115	331.6	0.189
331.8	0.065	331.8	0.097	331.8	0.2						331.8	0.082	331.8	0.116	331.8	0.19
332	0.065	332	0.098	332	0.201						332	0.083	332	0.117	332	0.191
332.2	0.066	332.2	0.099	332.2	0.202						332.2	0.084	332.2	0.117	332.2	0.192
332.4	0.066	332.4	0.1	332.4	0.204						332.4	0.084	332.4	0.118	332.4	0.193
332.6	0.067	332.6	0.1	332.6	0.205						332.6	0.085	332.6	0.119	332.6	0.194
332.8	0.067	332.8	0.101	332.8	0.206						332.8	0.085	332.8	0.121	332.8	0.195
333	0.068	333	0.102	333	0.208						333	0.086	333	0.122	333	0.197
333.2	0.069	333.2	0.103	333.2	0.209						333.2	0.087	333.2	0.123	333.2	0.198
333.4	0.069	333.4	0.104	333.4	0.211						333.4	0.088	333.4	0.124	333.4	0.199
333.6	0.07	333.6	0.105	333.6	0.212						333.6	0.088	333.6	0.125	333.6	0.2
333.8	0.071	333.8	0.106	333.8	0.214						333.8	0.089	333.8	0.127	333.8	0.202
334	0.072	334	0.107	334	0.215						334	0.09	334	0.128	334	0.203
334.2	0.072	334.2	0.108	334.2	0.217						334.2	0.09	334.2	0.129	334.2	0.205
334.4	0.073	334.4	0.109	334.4	0.218						334.4	0.091	334.4	0.13	334.4	0.206
334.6	0.073	334.6	0.11	334.6	0.22						334.6	0.092	334.6	0.131	334.6	0.207
334.8	0.074	334.8	0.111	334.8	0.222						334.8	0.093	334.8	0.132	334.8	0.209
335	0.075	335	0.112	335	0.223						335	0.093	335	0.134	335	0.21
335.2	0.075	335.2	0.113	335.2	0.225						335.2	0.094	335.2	0.135	335.2	0.211
335.4	0.076	335.4	0.114	335.4	0.226						335.4	0.095	335.4	0.136	335.4	0.213
335.6	0.077	335.6	0.115	335.6	0.228						335.6	0.095	335.6	0.137	335.6	0.214
335.8	0.078	335.8	0.116	335.8	0.229						335.8	0.096	335.8	0.138	335.8	0.215
336	0.078	336	0.118	336	0.231						336	0.097	336	0.14	336	0.217
336.2	0.079	336.2	0.119	336.2	0.233						336.2	0.098	336.2	0.141	336.2	0.218
336.4	0.08	336.4	0.12	336.4	0.235						336.4	0.099	336.4	0.143	336.4	0.22
336.6	0.081	336.6	0.121	336.6	0.237						336.6	0.1	336.6	0.144	336.6	0.222
336.8	0.082	336.8	0.123	336.8	0.238						336.8	0.101	336.8	0.146	336.8	0.223
337	0.083	337	0.124	337	0.24						337	0.102	337	0.147	337	0.225
337.2	0.084	337.2	0.125	337.2	0.242						337.2	0.103	337.2	0.149	337.2	0.227
337.4	0.085	337.4	0.127	337.4	0.244						337.4	0.104	337.4	0.15	337.4	0.229
337.6	0.085	337.6	0.128	337.6	0.246						337.6	0.105	337.6	0.153	337.6	0.23
337.8	0.086	337.8	0.129	337.8	0.248						337.8	0.106	337.8	0.154	337.8	0.232
338	0.087	338	0.131	338	0.249						338	0.107	338	0.156	338	0.234
338.2	0.088	338.2	0.132	338.2	0.251						338.2	0.108	338.2	0.157	338.2	0.236
338.4	0.089	338.4	0.134	338.4	0.253						338.4	0.109	338.4	0.158	338.4	0.237
338.6	0.09	338.6	0.135	338.6	0.255						338.6	0.11	338.6	0.16	338.6	0.239
338.8	0.091	338.8	0.137	338.8	0.257						338.8	0.111	338.8	0.161	338.8	0.241
339	0.092	339	0.138	339	0.259						339	0.112	339	0.163	339	0.243
339.2	0.093	339.2	0.14	339.2	0.261						339.2	0.112	339.2	0.164	339.2	0.244
339.4	0.094	339.4	0.142	339.4	0.263						339.4	0.113	339.4	0.165	339.4	0.246
339.6	0.095	339.6	0.144	339.6	0.265						339.6	0.115	339.6	0.167	339.6	0.248
339.8	0.096	339.8	0.145	339.8	0.267						339.8	0.116	339.8	0.169	339.8	0.249
340	0.097	340	0.146	340	0.268						340	0.117	340	0.171	340	0.251
340.2	0.098	340.2	0.147	340.2	0.27						340.2	0.118	340.2	0.172	340.2	0.253
340.4	0.099	340.4	0.149	340.4	0.272						340.4	0.119	340.4	0.174	340.4	0.255
340.6	0.1	340.6	0.151	340.6	0.274						340.6	0.12	340.6	0.175	340.6	0.257
340.8	0.101	340.8	0.152	340.8	0.276						340.8	0.121	340.8	0.177	340.8	0.259
341	0.102	341	0.154	341	0.278						341	0.122	341	0.179	341	0.261
341.2	0.103	341.2	0.156	341.2	0.28						341.2	0.123	341.2	0.18	341.2	0.263
341.4	0.104	341.4	0.157	341.4	0.282						341.4	0.124	341.4	0.182	341.4	0.265
341.6	0.105	341.6	0.159	341.6	0.284						341.6	0.125	341.6	0.184	341.6	0.266
341.8	0.106	341.8	0.161	341.8	0.286						341.8	0.126	341.8	0.186	341.8	0.268
342	0.108	342	0.163	342	0.288						342	0.127	342	0.187	342	0.27
342.2	0.109	342.2	0.165	342.2	0.29						342.2	0.128	342.2	0.189	342.2	0.272
342.4	0.11	342.4	0.166	342.4	0.292						342.4	0.13	342.4	0.191	342.4	0.274
342.6	0.111	342.6	0.168	342.6	0.294						342.6	0.131	342.6	0.192	342.6	0.277
342.8	0.113	342.8	0.17	342.8	0.296						342.8	0.132	342.8	0.194	342.8	0.279
343	0.114	343	0.172	343	0.298						343	0.134	343	0.196	343	0.281
343.2	0.115	343.2	0.173	343.2	0.3						343.2	0.135	343.2	0.198	343.2	0.283
343.4	0.116	343.4	0.175	343.4	0.302						343.4	0.136	343.4	0.2	343.4	0.285
343.6	0.117	343.6	0.177	343.6	0.304						343.6	0.137	343.6	0.201	343.6	0.287
343.8	0.118	343.8	0.179	343.8	0.306						343.8	0.138	343.8	0.204	343.8	0.289
344	0.12	344	0.18	344	0.308						344	0.14	344	0.205	344	0.291
344.2	0.121	344.2	0.183	344.2	0.31						344.2	0.141	344.2	0.207	344.2	0.293
344.4	0.122	344.4	0.184	344.4	0.312						344.4	0.142	344.4	0.209	344.4	0.295
344.6	0.123	344.6	0.186	344.6	0.314						344.6	0.143	344.6	0.21	344.6	0.297
344.8	0.124	344.8	0.188	344.8	0.316						344.8	0.144	344.8	0.213	344.8	0.299
345	0.125	345	0.19	345	0.318						345	0.145	345	0.214	345	0.301
345.2	0.127	345.2	0.192	345.2	0.32						345.2	0.146	345.2	0.216	345.2	0.303
345.4	0.128	345.4	0.194	345.4	0.322						345.4	0.147	345.4	0.218	345.4	0.305
345.6	0.129	345.6	0.196	345.6	0.324						345.6	0.148	345.6	0.219	345.6	0.307
345.8	0.13	345.8	0.197	345.8	0.326						345.8	0.149	345.8	0.221	345.8	0.309
346	0.131	346	0.2	346	0.328						346	0.15	346	0.222	346	0.312
346.2	0.133	346.2	0.202	346.2	0.33						346.2	0.152	346.2	0.225	346.2	0.314
346.4	0.134	346.4	0.203	346.4	0.332						346.4	0.153	346.4	0.227	346.4	0.316
346.6	0.135	346.6	0.206	346.6	0.334						346.6	0.154	346.6	0.229	346.6	0.318
346.8	0.136	346.8	0.208	346.8	0.337						346.8	0.155	346.8	0.231	346.8	0.32
347	0.138	347	0.209	347	0.339						347	0.157	347	0.232	347	0.322
347.2	0.139	347.2	0.212	347.2	0.341						347.2	0.158	347.2	0.234	347.2	0.324
347.4	0.14	347.4	0.214	347.4	0.343						347.4	0.159	347.4	0.236	347.4	0.327
347.6	0.141	347.6	0.216	347.6	0.345						347.6	0.16	347.6	0.238	347.6	0.329
347.8	0.143	347.8	0.218	347.8	0.348						347.8	0.162	347.8	0.24	347.8	0.332
348	0.144	348	0.219	348	0.35						348	0.163	348	0.242	348	0.335
348.2	0.145	348.2	0.221	348.2	0.352						348.2	0.165	348.2	0.245	348.2	0.337
348.4	0.146	348.4	0.223	348.4	0.354						348.4	0.166	348.4	0.247	348.4	0.339
348.6	0.147	348.6	0.225	348.6	0.356						348.6	0.167	348.6	0.249	348.6	0.342
348.8	0.148	348.8	0.227	348.8	0.358						348.8	0.168	348.8	0.25	348.8	0.344
349	0.15	349	0.229	349	0.36						349	0.17	349	0.252	349	0.346
349.2	0.151	349.2	0.231	349.2	0.363						349.2	0.171	349.2	0.254	349.2	0.348
349.4	0.152	349.4	0.233	349.4	0.365						349.4	0.172	349.4	0.256	349.4	0.35
349.6	0.153	349.6	0.236	349.6	0.368						349.6	0.173	349.6	0.258	349.6	0.353
349.8	0.155	349.8	0.238	349.8	0.37						349.8	0.174	349.8	0.26	349.8	0.355
350	0.156	350	0.24	350	0.372						350	0.175	350	0.262	350	0.357
350.2	0.158	350.2	0.242	350.2	0.374						350.2	0.177	350.2	0.264	350.2	0.36
350.4	0.159	350.4	0.243	350.4	0.376						350.4	0.178	350.4	0.265	350.4	0.362
350.6	0.16	350.6	0.245	350.6	0.379						350.6	0.179	350.6	0.267	350.6	0.364
350.8	0.162	350.8	0.247	350.8	0.381						350.8	0.18	350.8	0.269	350.8	0.367
351	0.162	351	0.249	351	0.383						351	0.181	351	0.271	351	0.369
351.2	0.164	351.2	0.251	351.2	0.386						351.2	0.182	351.2	0.273	351.2	0.372
351.4	0.165	351.4	0.253	351.4	0.387						351.4	0.184	351.4	0.275	351.4	0.374
351.6	0.166	351.6	0.255	351.6	0.39						351.6	0.185	351.6	0.277	351.6	0.377
351.8	0.168	351.8	0.257	351.8	0.392						351.8	0.187	351.8	0.279	351.8	0.38
352	0.169	352	0.259	352	0.394						352	0.188	352	0.282	352	0.382
352.2	0.17	352.2	0.261	352.2	0.397						352.2	0.189	352.2	0.284	352.2	0.384
352.4	0.172	352.4	0.263	352.4	0.399						352.4	0.191	352.4	0.286	352.4	0.387
352.6	0.172	352.6	0.265	352.6	0.402						352.6	0.192	352.6	0.288	352.6	0.39
352.8	0.174	352.8	0.267	352.8	0.404						352.8	0.193	352.8	0.29	352.8	0.393
353	0.175	353	0.269	353	0.407						353	0.194	353	0.292	353	0.396
353.2	0.176	353.2	0.271	353.2	0.409						353.2	0.196	353.2	0.294	353.2	0.398
353.4	0.178	353.4	0.273	353.4	0.412						353.4	0.197	353.4	0.296	353.4	0.401
353.6	0.178	353.6	0.275	353.6	0.414						353.6	0.198	353.6	0.298	353.6	0.403
353.8	0.18	353.8	0.277	353.8	0.417						353.8	0.199	353.8	0.3	353.8	0.406
354	0.18	354	0.279	354	0.419						354	0.2	354	0.302	354	0.408
354.2	0.181	354.2	0.281	354.2	0.421						354.2	0.202	354.2	0.304	354.2	0.411
354.4	0.183	354.4	0.282	354.4	0.423						354.4	0.203	354.4	0.306	354.4	0.413
354.6	0.184	354.6	0.284	354.6	0.425						354.6	0.204	354.6	0.308	354.6	0.416
354.8	0.185	354.8	0.286	354.8	0.428						354.8	0.206	354.8	0.31	354.8	0.419
355	0.187	355	0.288	355	0.43						355	0.207	355	0.312	355	0.421
355.2	0.188	355.2	0.29	355.2	0.433						355.2	0.208	355.2	0.314	355.2	0.424
355.4	0.189	355.4	0.292	355.4	0.436						355.4	0.209	355.4	0.316	355.4	0.427
355.6	0.19	355.6	0.295	355.6	0.439						355.6	0.211	355.6	0.318	355.6	0.43
355.8	0.191	355.8	0.296	355.8	0.441						355.8	0.212	355.8	0.32	355.8	0.433
356	0.192	356	0.298	356	0.444						356	0.213	356	0.322	356	0.436
356.2	0.194	356.2	0.3	356.2	0.447						356.2	0.214	356.2	0.325	356.2	0.438
356.4	0.195	356.4	0.302	356.4	0.449						356.4	0.216	356.4	0.327	356.4	0.441
356.6	0.196	356.6	0.304	356.6	0.452						356.6	0.217	356.6	0.329	356.6	0.443
356.8	0.198	356.8	0.306	356.8	0.454						356.8	0.219	356.8	0.331	356.8	0.446
357	0.198	357	0.308	357	0.457						357	0.22	357	0.334	357	0.449
357.2	0.2	357.2	0.31	357.2	0.459						357.2	0.222	357.2	0.336	357.2	0.452
357.4	0.201	357.4	0.312	357.4	0.462						357.4	0.223	357.4	0.338	357.4	0.455
357.6	0.202	357.6	0.313	357.6	0.464						357.6	0.224	357.6	0.34	357.6	0.457
357.8	0.203	357.8	0.316	357.8	0.467						357.8	0.225	357.8	0.342	357.8	0.461
358	0.204	358	0.317	358	0.47						358	0.226	358	0.344	358	0.464
358.2	0.205	358.2	0.32	358.2	0.473						358.2	0.228	358.2	0.346	358.2	0.467
358.4	0.206	358.4	0.322	358.4	0.475						358.4	0.229	358.4	0.349	358.4	0.47
358.6	0.208	358.6	0.323	358.6	0.478						358.6	0.23	358.6	0.351	358.6	0.473
358.8	0.209	358.8	0.325	358.8	0.48						358.8	0.232	358.8	0.353	358.8	0.476
359	0.21	359	0.327	359	0.483						359	0.233	359	0.356	359	0.479
359.2	0.211	359.2	0.329	359.2	0.486						359.2	0.235	359.2	0.358	359.2	0.481
359.4	0.212	359.4	0.331	359.4	0.489						359.4	0.236	359.4	0.361	359.4	0.485
359.6	0.213	359.6	0.333	359.6	0.492						359.6	0.237	359.6	0.363	359.6	0.488
359.8	0.215	359.8	0.335	359.8	0.494						359.8	0.239	359.8	0.365	359.8	0.492
360	0.216	360	0.338	360	0.497						360	0.24	360	0.367	360	0.495
360.2	0.217	360.2	0.34	360.2	0.499						360.2	0.241	360.2	0.37	360.2	0.498
360.4	0.218	360.4	0.343	360.4	0.502						360.4	0.243	360.4	0.372	360.4	0.502
360.6	0.219	360.6	0.344	360.6	0.505						360.6	0.244	360.6	0.374	360.6	0.505
360.8	0.22	360.8	0.346	360.8	0.507						360.8	0.245	360.8	0.377	360.8	0.508
361	0.221	361	0.348	361	0.51						361	0.246	361	0.379	361	0.511
361.2	0.222	361.2	0.35	361.2	0.513						361.2	0.248	361.2	0.381	361.2	0.514
361.4	0.223	361.4	0.352	361.4	0.516						361.4	0.249	361.4	0.384	361.4	0.517
361.6	0.224	361.6	0.354	361.6	0.519						361.6	0.25	361.6	0.386	361.6	0.52
361.8	0.225	361.8	0.356	361.8	0.521						361.8	0.252	361.8	0.388	361.8	0.524
362	0.227	362	0.358	362	0.524						362	0.253	362	0.391	362	0.526
362.2	0.228	362.2	0.36	362.2	0.527						362.2	0.254	362.2	0.393	362.2	0.53
362.4	0.229	362.4	0.362	362.4	0.53						362.4	0.256	362.4	0.395	362.4	0.533
362.6	0.23	362.6	0.364	362.6	0.533						362.6	0.257	362.6	0.398	362.6	0.536
362.8	0.231	362.8	0.366	362.8	0.536						362.8	0.258	362.8	0.4	362.8	0.54
363	0.233	363	0.368	363	0.539						363	0.26	363	0.403	363	0.543
363.2	0.234	363.2	0.37	363.2	0.542						363.2	0.261	363.2	0.405	363.2	0.546
363.4	0.235	363.4	0.372	363.4	0.545						363.4	0.262	363.4	0.407	363.4	0.549
363.6	0.236	363.6	0.374	363.6	0.548						363.6	0.264	363.6	0.41	363.6	0.552
363.8	0.237	363.8	0.376	363.8	0.55						363.8	0.265	363.8	0.412	363.8	0.555
364	0.238	364	0.378	364	0.553						364	0.266	364	0.414	364	0.558
364.2	0.239	364.2	0.38	364.2	0.556						364.2	0.268	364.2	0.417	364.2	0.562
364.4	0.24	364.4	0.382	364.4	0.559						364.4	0.269	364.4	0.419	364.4	0.564
364.6	0.241	364.6	0.384	364.6	0.562						364.6	0.27	364.6	0.422	364.6	0.568
364.8	0.242	364.8	0.386	364.8	0.565						364.8	0.272	364.8	0.424	364.8	0.571
365	0.244	365	0.388	365	0.568						365	0.273	365	0.427	365	0.575
365.2	0.245	365.2	0.39	365.2	0.571						365.2	0.275	365.2	0.429	365.2	0.578
365.4	0.246	365.4	0.392	365.4	0.574						365.4	0.276	365.4	0.432	365.4	0.582
365.6	0.247	365.6	0.394	365.6	0.577						365.6	0.278	365.6	0.434	365.6	0.585
365.8	0.248	365.8	0.396	365.8	0.58						365.8	0.279	365.8	0.437	365.8	0.588
366	0.249	366	0.398	366	0.583						366	0.28	366	0.439	366	0.592
366.2	0.251	366.2	0.4	366.2	0.586						366.2	0.282	366.2	0.442	366.2	0.595
366.4	0.252	366.4	0.402	366.4	0.589						366.4	0.283	366.4	0.444	366.4	0.599
366.6	0.253	366.6	0.405	366.6	0.592						366.6	0.284	366.6	0.447	366.6	0.602
366.8	0.254	366.8	0.406	366.8	0.596						366.8	0.285	366.8	0.449	366.8	0.605
367	0.255	367	0.408	367	0.598						367	0.287	367	0.452	367	0.609
367.2	0.256	367.2	0.411	367.2	0.602						367.2	0.289	367.2	0.455	367.2	0.612
367.4	0.257	367.4	0.413	367.4	0.605						367.4	0.29	367.4	0.457	367.4	0.615
367.6	0.259	367.6	0.414	367.6	0.608						367.6	0.291	367.6	0.46	367.6	0.619
367.8	0.26	367.8	0.416	367.8	0.611						367.8	0.293	367.8	0.463	367.8	0.623
368	0.261	368	0.418	368	0.614						368	0.294	368	0.465	368	0.626
368.2	0.262	368.2	0.42	368.2	0.617						368.2	0.295	368.2	0.468	368.2	0.63
368.4	0.263	368.4	0.423	368.4	0.62						368.4	0.297	368.4	0.471	368.4	0.633
368.6	0.265	368.6	0.425	368.6	0.624						368.6	0.298	368.6	0.473	368.6	0.637
368.8	0.266	368.8	0.427	368.8	0.627						368.8	0.3	368.8	0.476	368.8	0.64
369	0.267	369	0.429	369	0.63						369	0.301	369	0.478	369	0.644
369.2	0.268	369.2	0.431	369.2	0.633						369.2	0.302	369.2	0.481	369.2	0.647
369.4	0.269	369.4	0.432	369.4	0.636						369.4	0.304	369.4	0.483	369.4	0.651
369.6	0.27	369.6	0.435	369.6	0.639						369.6	0.305	369.6	0.486	369.6	0.654
369.8	0.271	369.8	0.437	369.8	0.643						369.8	0.306	369.8	0.488	369.8	0.658
370	0.272	370	0.439	370	0.646						370	0.307	370	0.491	370	0.661
370.2	0.273	370.2	0.441	370.2	0.649						370.2	0.309	370.2	0.494	370.2	0.665
370.4	0.275	370.4	0.443	370.4	0.653						370.4	0.31	370.4	0.497	370.4	0.668
370.6	0.276	370.6	0.445	370.6	0.656						370.6	0.312	370.6	0.499	370.6	0.672
370.8	0.277	370.8	0.447	370.8	0.659						370.8	0.313	370.8	0.502	370.8	0.676
371	0.278	371	0.449	371	0.663						371	0.315	371	0.505	371	0.68
371.2	0.28	371.2	0.451	371.2	0.666						371.2	0.316	371.2	0.507	371.2	0.684
371.4	0.281	371.4	0.454	371.4	0.67						371.4	0.318	371.4	0.51	371.4	0.687
371.6	0.282	371.6	0.456	371.6	0.673						371.6	0.319	371.6	0.513	371.6	0.691
371.8	0.283	371.8	0.458	371.8	0.676						371.8	0.32	371.8	0.515	371.8	0.695
372	0.284	372	0.46	372	0.68						372	0.322	372	0.518	372	0.698
372.2	0.285	372.2	0.462	372.2	0.683						372.2	0.323	372.2	0.521	372.2	0.702
372.4	0.286	372.4	0.464	372.4	0.687						372.4	0.324	372.4	0.523	372.4	0.706
372.6	0.287	372.6	0.466	372.6	0.69						372.6	0.326	372.6	0.526	372.6	0.71
372.8	0.288	372.8	0.468	372.8	0.694						372.8	0.327	372.8	0.529	372.8	0.714
373	0.29	373	0.47	373	0.697						373	0.329	373	0.531	373	0.717
373.2	0.291	373.2	0.472	373.2	0.7						373.2	0.33	373.2	0.534	373.2	0.721
373.4	0.292	373.4	0.474	373.4	0.704						373.4	0.331	373.4	0.537	373.4	0.725
373.6	0.293	373.6	0.476	373.6	0.708						373.6	0.333	373.6	0.539	373.6	0.729
373.8	0.294	373.8	0.478	373.8	0.711						373.8	0.334	373.8	0.542	373.8	0.732
374	0.295	374	0.481	374	0.715						374	0.335	374	0.545	374	0.737
374.2	0.296	374.2	0.483	374.2	0.719						374.2	0.337	374.2	0.547	374.2	0.741
374.4	0.298	374.4	0.485	374.4	0.722						374.4	0.338	374.4	0.55	374.4	0.744
374.6	0.299	374.6	0.487	374.6	0.726						374.6	0.34	374.6	0.552	374.6	0.748
374.8	0.3	374.8	0.489	374.8	0.73						374.8	0.341	374.8	0.555	374.8	0.752
375	0.301	375	0.491	375	0.734						375	0.342	375	0.558	375	0.756
375.2	0.303	375.2	0.493	375.2	0.737						375.2	0.344	375.2	0.561	375.2	0.76
375.4	0.304	375.4	0.496	375.4	0.741						375.4	0.345	375.4	0.564	375.4	0.764
375.6	0.305	375.6	0.498	375.6	0.745						375.6	0.347	375.6	0.567	375.6	0.768
375.8	0.306	375.8	0.5	375.8	0.749						375.8	0.348	375.8	0.57	375.8	0.772
376	0.307	376	0.502	376	0.752						376	0.35	376	0.572	376	0.776
376.2	0.309	376.2	0.504	376.2	0.756						376.2	0.351	376.2	0.575	376.2	0.781
376.4	0.31	376.4	0.506	376.4	0.76						376.4	0.353	376.4	0.578	376.4	0.785
376.6	0.311	376.6	0.508	376.6	0.764						376.6	0.354	376.6	0.581	376.6	0.789
376.8	0.312	376.8	0.51	376.8	0.768						376.8	0.355	376.8	0.584	376.8	0.793
377	0.313	377	0.513	377	0.771						377	0.356	377	0.587	377	0.797
377.2	0.314	377.2	0.515	377.2	0.775						377.2	0.358	377.2	0.59	377.2	0.801
377.4	0.316	377.4	0.517	377.4	0.779						377.4	0.359	377.4	0.592	377.4	0.805
377.6	0.317	377.6	0.519	377.6	0.783						377.6	0.361	377.6	0.595	377.6	0.809
377.8	0.318	377.8	0.521	377.8	0.786						377.8	0.362	377.8	0.597	377.8	0.813
378	0.319	378	0.523	378	0.79						378	0.363	378	0.6	378	0.817
378.2	0.32	378.2	0.525	378.2	0.794						378.2	0.365	378.2	0.603	378.2	0.821
378.4	0.321	378.4	0.527	378.4	0.798						378.4	0.366	378.4	0.605	378.4	0.825
378.6	0.322	378.6	0.529	378.6	0.802						378.6	0.367	378.6	0.608	378.6	0.829
378.8	0.324	378.8	0.531	378.8	0.806						378.8	0.369	378.8	0.611	378.8	0.833
379	0.325	379	0.534	379	0.809						379	0.37	379	0.614	379	0.837
379.2	0.326	379.2	0.536	379.2	0.814						379.2	0.371	379.2	0.617	379.2	0.841
379.4	0.328	379.4	0.538	379.4	0.818						379.4	0.373	379.4	0.619	379.4	0.845
379.6	0.329	379.6	0.54	379.6	0.821						379.6	0.374	379.6	0.622	379.6	0.849
379.8	0.33	379.8	0.542	379.8	0.825						379.8	0.376	379.8	0.625	379.8	0.853
380	0.331	380	0.544	380	0.829						380	0.377	380	0.628	380	0.857
380.2	0.332	380.2	0.546	380.2	0.833						380.2	0.379	380.2	0.631	380.2	0.862
380.4	0.333	380.4	0.549	380.4	0.837						380.4	0.38	380.4	0.634	380.4	0.866
380.6	0.335	380.6	0.551	380.6	0.841						380.6	0.381	380.6	0.637	380.6	0.87
380.8	0.336	380.8	0.553	380.8	0.846						380.8	0.383	380.8	0.64	380.8	0.875
381	0.337	381	0.555	381	0.85						381	0.384	381	0.643	381	0.879
381.2	0.339	381.2	0.557	381.2	0.854						381.2	0.386	381.2	0.646	381.2	0.884
381.4	0.34	381.4	0.559	381.4	0.858						381.4	0.387	381.4	0.649	381.4	0.888
381.6	0.341	381.6	0.562	381.6	0.863						381.6	0.388	381.6	0.652	381.6	0.892
381.8	0.342	381.8	0.563	381.8	0.866						381.8	0.39	381.8	0.655	381.8	0.896
382	0.343	382	0.565	382	0.87						382	0.391	382	0.658	382	0.9
382.2	0.345	382.2	0.567	382.2	0.874						382.2	0.393	382.2	0.661	382.2	0.904
382.4	0.346	382.4	0.569	382.4	0.878						382.4	0.394	382.4	0.663	382.4	0.908
382.6	0.347	382.6	0.572	382.6	0.883						382.6	0.395	382.6	0.666	382.6	0.912
382.8	0.348	382.8	0.574	382.8	0.886						382.8	0.396	382.8	0.669	382.8	0.916
383	0.349	383	0.576	383	0.89						383	0.398	383	0.672	383	0.921
383.2	0.35	383.2	0.578	383.2	0.894						383.2	0.399	383.2	0.675	383.2	0.925
383.4	0.352	383.4	0.58	383.4	0.899						383.4	0.401	383.4	0.678	383.4	0.929
383.6	0.353	383.6	0.582	383.6	0.903						383.6	0.402	383.6	0.681	383.6	0.933
383.8	0.354	383.8	0.584	383.8	0.907						383.8	0.403	383.8	0.684	383.8	0.938
384	0.355	384	0.586	384	0.911						384	0.404	384	0.687	384	0.942
384.2	0.357	384.2	0.588	384.2	0.915						384.2	0.405	384.2	0.69	384.2	0.946
384.4	0.358	384.4	0.59	384.4	0.92						384.4	0.407	384.4	0.693	384.4	0.95
384.6	0.359	384.6	0.592	384.6	0.924						384.6	0.408	384.6	0.696	384.6	0.954
384.8	0.36	384.8	0.594	384.8	0.928						384.8	0.409	384.8	0.699	384.8	0.959
385	0.361	385	0.596	385	0.932						385	0.411	385	0.702	385	0.963
385.2	0.362	385.2	0.598	385.2	0.936						385.2	0.412	385.2	0.705	385.2	0.967
385.4	0.363	385.4	0.6	385.4	0.94						385.4	0.413	385.4	0.708	385.4	0.971
385.6	0.365	385.6	0.602	385.6	0.945						385.6	0.414	385.6	0.71	385.6	0.976
385.8	0.366	385.8	0.604	385.8	0.949						385.8	0.416	385.8	0.713	385.8	0.98
386	0.367	386	0.606	386	0.953						386	0.417	386	0.716	386	0.984
386.2	0.368	386.2	0.608	386.2	0.957						386.2	0.418	386.2	0.719	386.2	0.989
386.4	0.37	386.4	0.61	386.4	0.962						386.4	0.419	386.4	0.722	386.4	0.993
386.6	0.371	386.6	0.612	386.6	0.966						386.6	0.421	386.6	0.725	386.6	0.997
386.8	0.372	386.8	0.614	386.8	0.971						386.8	0.422	386.8	0.728	386.8	1.002
387	0.373	387	0.616	387	0.975						387	0.423	387	0.731	387	1.006
387.2	0.374	387.2	0.618	387.2	0.978						387.2	0.424	387.2	0.734	387.2	1.009
387.4	0.375	387.4	0.62	387.4	0.982						387.4	0.426	387.4	0.737	387.4	1.014
387.6	0.376	387.6	0.621	387.6	0.987						387.6	0.427	387.6	0.739	387.6	1.018
387.8	0.377	387.8	0.623	387.8	0.991						387.8	0.428	387.8	0.742	387.8	1.022
388	0.379	388	0.625	388	0.995						388	0.429	388	0.745	388	1.026
388.2	0.38	388.2	0.627	388.2	0.999						388.2	0.43	388.2	0.748	388.2	1.03
388.4	0.381	388.4	0.629	388.4	1.004						388.4	0.431	388.4	0.751	388.4	1.034
388.6	0.382	388.6	0.631	388.6	1.008						388.6	0.433	388.6	0.754	388.6	1.039
388.8	0.383	388.8	0.633	388.8	1.012						388.8	0.434	388.8	0.757	388.8	1.043
389	0.384	389	0.634	389	1.017						389	0.435	389	0.759	389	1.047
389.2	0.386	389.2	0.636	389.2	1.021						389.2	0.436	389.2	0.762	389.2	1.051
389.4	0.387	389.4	0.638	389.4	1.026						389.4	0.437	389.4	0.765	389.4	1.055
389.6	0.388	389.6	0.64	389.6	1.03						389.6	0.438	389.6	0.768	389.6	1.059
389.8	0.389	389.8	0.642	389.8	1.034						389.8	0.439	389.8	0.771	389.8	1.063
390	0.39	390	0.644	390	1.039						390	0.44	390	0.774	390	1.067
390.2	0.392	390.2	0.646	390.2	1.043						390.2	0.442	390.2	0.776	390.2	1.072
390.4	0.393	390.4	0.648	390.4	1.047						390.4	0.443	390.4	0.779	390.4	1.076
390.6	0.394	390.6	0.649	390.6	1.052						390.6	0.444	390.6	0.782	390.6	1.08
390.8	0.395	390.8	0.651	390.8	1.056						390.8	0.445	390.8	0.785	390.8	1.084
391	0.396	391	0.653	391	1.06						391	0.446	391	0.788	391	1.088
391.2	0.397	391.2	0.655	391.2	1.064						391.2	0.447	391.2	0.79	391.2	1.092
391.4	0.398	391.4	0.656	391.4	1.068						391.4	0.448	391.4	0.793	391.4	1.096
391.6	0.399	391.6	0.658	391.6	1.072						391.6	0.449	391.6	0.796	391.6	1.1
391.8	0.4	391.8	0.66	391.8	1.077						391.8	0.45	391.8	0.798	391.8	1.104
392	0.401	392	0.661	392	1.081						392	0.451	392	0.801	392	1.107
392.2	0.402	392.2	0.663	392.2	1.085						392.2	0.452	392.2	0.804	392.2	1.111
392.4	0.403	392.4	0.665	392.4	1.089						392.4	0.453	392.4	0.807	392.4	1.115
392.6	0.404	392.6	0.666	392.6	1.093						392.6	0.454	392.6	0.809	392.6	1.119
392.8	0.405	392.8	0.668	392.8	1.097						392.8	0.455	392.8	0.812	392.8	1.123
393	0.406	393	0.67	393	1.101						393	0.456	393	0.814	393	1.127
393.2	0.408	393.2	0.672	393.2	1.106						393.2	0.457	393.2	0.817	393.2	1.131
393.4	0.409	393.4	0.673	393.4	1.11						393.4	0.458	393.4	0.82	393.4	1.135
393.6	0.409	393.6	0.675	393.6	1.114						393.6	0.459	393.6	0.822	393.6	1.138
393.8	0.411	393.8	0.676	393.8	1.117						393.8	0.46	393.8	0.825	393.8	1.141
394	0.412	394	0.678	394	1.121						394	0.461	394	0.827	394	1.145
394.2	0.412	394.2	0.679	394.2	1.125						394.2	0.462	394.2	0.829	394.2	1.148
394.4	0.414	394.4	0.681	394.4	1.129						394.4	0.463	394.4	0.832	394.4	1.152
394.6	0.414	394.6	0.683	394.6	1.134						394.6	0.464	394.6	0.834	394.6	1.156
394.8	0.415	394.8	0.685	394.8	1.138						394.8	0.465	394.8	0.837	394.8	1.16
395	0.417	395	0.686	395	1.142						395	0.466	395	0.839	395	1.163
395.2	0.418	395.2	0.688	395.2	1.146						395.2	0.467	395.2	0.842	395.2	1.167
395.4	0.419	395.4	0.689	395.4	1.149						395.4	0.467	395.4	0.844	395.4	1.17
395.6	0.42	395.6	0.69	395.6	1.153						395.6	0.468	395.6	0.846	395.6	1.173
395.8	0.421	395.8	0.692	395.8	1.157						395.8	0.469	395.8	0.848	395.8	1.177
396	0.422	396	0.694	396	1.161						396	0.47	396	0.851	396	1.18
396.2	0.423	396.2	0.695	396.2	1.165						396.2	0.471	396.2	0.853	396.2	1.184
396.4	0.424	396.4	0.697	396.4	1.169						396.4	0.472	396.4	0.856	396.4	1.187
396.6	0.425	396.6	0.698	396.6	1.173						396.6	0.473	396.6	0.858	396.6	1.19
396.8	0.426	396.8	0.7	396.8	1.177						396.8	0.474	396.8	0.861	396.8	1.194
397	0.427	397	0.701	397	1.181						397	0.474	397	0.863	397	1.197
397.2	0.428	397.2	0.703	397.2	1.184						397.2	0.475	397.2	0.865	397.2	1.2
397.4	0.429	397.4	0.704	397.4	1.188						397.4	0.476	397.4	0.868	397.4	1.203
397.6	0.43	397.6	0.705	397.6	1.192						397.6	0.477	397.6	0.87	397.6	1.206
397.8	0.431	397.8	0.707	397.8	1.195						397.8	0.478	397.8	0.872	397.8	1.21
398	0.432	398	0.708	398	1.199						398	0.478	398	0.875	398	1.212
398.2	0.433	398.2	0.71	398.2	1.202						398.2	0.479	398.2	0.876	398.2	1.215
398.4	0.433	398.4	0.711	398.4	1.206						398.4	0.48	398.4	0.878	398.4	1.218
398.6	0.434	398.6	0.712	398.6	1.209						398.6	0.481	398.6	0.88	398.6	1.221
398.8	0.435	398.8	0.713	398.8	1.212						398.8	0.482	398.8	0.882	398.8	1.224
399	0.436	399	0.715	399	1.216						399	0.483	399	0.884	399	1.227
399.2	0.437	399.2	0.716	399.2	1.219						399.2	0.483	399.2	0.886	399.2	1.23
399.4	0.438	399.4	0.717	399.4	1.223						399.4	0.484	399.4	0.888	399.4	1.232
399.6	0.439	399.6	0.719	399.6	1.226						399.6	0.485	399.6	0.89	399.6	1.235
399.8	0.44	399.8	0.72	399.8	1.229						399.8	0.485	399.8	0.892	399.8	1.238
400	0.441	400	0.721	400	1.232						400	0.486	400	0.894	400	1.24
400.2	0.441	400.2	0.722	400.2	1.235						400.2	0.486	400.2	0.895	400.2	1.242
400.4	0.442	400.4	0.723	400.4	1.238						400.4	0.487	400.4	0.897	400.4	1.244
400.6	0.443	400.6	0.724	400.6	1.241						400.6	0.487	400.6	0.898	400.6	1.246
400.8	0.444	400.8	0.725	400.8	1.244						400.8	0.488	400.8	0.9	400.8	1.249
401	0.445	401	0.727	401	1.248						401	0.488	401	0.902	401	1.251
401.2	0.446	401.2	0.728	401.2	1.251						401.2	0.489	401.2	0.903	401.2	1.254
401.4	0.447	401.4	0.729	401.4	1.254						401.4	0.49	401.4	0.905	401.4	1.256
401.6	0.448	401.6	0.73	401.6	1.257						401.6	0.49	401.6	0.907	401.6	1.258
401.8	0.449	401.8	0.731	401.8	1.26						401.8	0.491	401.8	0.908	401.8	1.26
402	0.45	402	0.732	402	1.263						402	0.491	402	0.91	402	1.262
402.2	0.451	402.2	0.733	402.2	1.265						402.2	0.492	402.2	0.911	402.2	1.264
402.4	0.451	402.4	0.734	402.4	1.268						402.4	0.492	402.4	0.913	402.4	1.266
402.6	0.452	402.6	0.735	402.6	1.27						402.6	0.493	402.6	0.914	402.6	1.268
402.8	0.453	402.8	0.736	402.8	1.273						402.8	0.493	402.8	0.916	402.8	1.27
403	0.454	403	0.737	403	1.275						403	0.494	403	0.917	403	1.271
403.2	0.454	403.2	0.738	403.2	1.278						403.2	0.494	403.2	0.919	403.2	1.273
403.4	0.455	403.4	0.739	403.4	1.281						403.4	0.495	403.4	0.92	403.4	1.275
403.6	0.456	403.6	0.74	403.6	1.283						403.6	0.495	403.6	0.921	403.6	1.277
403.8	0.457	403.8	0.741	403.8	1.286						403.8	0.496	403.8	0.922	403.8	1.278
404	0.457	404	0.742	404	1.288						404	0.496	404	0.924	404	1.28
404.2	0.458	404.2	0.743	404.2	1.29						404.2	0.497	404.2	0.924	404.2	1.281
404.4	0.459	404.4	0.743	404.4	1.292						404.4	0.497	404.4	0.926	404.4	1.282
404.6	0.459	404.6	0.744	404.6	1.294						404.6	0.498	404.6	0.927	404.6	1.283
404.8	0.46	404.8	0.744	404.8	1.296						404.8	0.498	404.8	0.928	404.8	1.284
405	0.461	405	0.745	405	1.298						405	0.498	405	0.929	405	1.285
405.2	0.462	405.2	0.746	405.2	1.3						405.2	0.499	405.2	0.93	405.2	1.287
405.4	0.462	405.4	0.747	405.4	1.302						405.4	0.499	405.4	0.931	405.4	1.288
405.6	0.463	405.6	0.748	405.6	1.303						405.6	0.499	405.6	0.931	405.6	1.289
405.8	0.464	405.8	0.748	405.8	1.305						405.8	0.5	405.8	0.932	405.8	1.29
406	0.464	406	0.749	406	1.307						406	0.5	406	0.933	406	1.291
406.2	0.465	406.2	0.749	406.2	1.308						406.2	0.5	406.2	0.934	406.2	1.291
406.4	0.466	406.4	0.75	406.4	1.31						406.4	0.501	406.4	0.935	406.4	1.292
406.6	0.466	406.6	0.75	406.6	1.312						406.6	0.501	406.6	0.935	406.6	1.293
406.8	0.467	406.8	0.751	406.8	1.313						406.8	0.501	406.8	0.936	406.8	1.293
407	0.468	407	0.752	407	1.315						407	0.501	407	0.936	407	1.294
407.2	0.469	407.2	0.753	407.2	1.316						407.2	0.502	407.2	0.937	407.2	1.294
407.4	0.469	407.4	0.753	407.4	1.318						407.4	0.502	407.4	0.937	407.4	1.294
407.6	0.47	407.6	0.754	407.6	1.319						407.6	0.502	407.6	0.938	407.6	1.295
407.8	0.47	407.8	0.754	407.8	1.32						407.8	0.503	407.8	0.938	407.8	1.295
408	0.471	408	0.755	408	1.321						408	0.503	408	0.939	408	1.295
408.2	0.471	408.2	0.755	408.2	1.322						408.2	0.503	408.2	0.939	408.2	1.295
408.4	0.472	408.4	0.756	408.4	1.323						408.4	0.503	408.4	0.939	408.4	1.295
408.6	0.472	408.6	0.756	408.6	1.324						408.6	0.503	408.6	0.94	408.6	1.295
408.8	0.473	408.8	0.756	408.8	1.325						408.8	0.504	408.8	0.94	408.8	1.295
409	0.473	409	0.756	409	1.326						409	0.504	409	0.941	409	1.295
409.2	0.474	409.2	0.757	409.2	1.326						409.2	0.504	409.2	0.941	409.2	1.295
409.4	0.474	409.4	0.757	409.4	1.327						409.4	0.504	409.4	0.941	409.4	1.295
409.6	0.474	409.6	0.757	409.6	1.327						409.6	0.504	409.6	0.941	409.6	1.295
409.8	0.475	409.8	0.757	409.8	1.328						409.8	0.505	409.8	0.941	409.8	1.294
410	0.475	410	0.757	410	1.328						410	0.505	410	0.941	410	1.293
410.2	0.476	410.2	0.758	410.2	1.329						410.2	0.505	410.2	0.941	410.2	1.293
410.4	0.477	410.4	0.758	410.4	1.329						410.4	0.505	410.4	0.941	410.4	1.292
410.6	0.477	410.6	0.759	410.6	1.329						410.6	0.505	410.6	0.941	410.6	1.291
410.8	0.478	410.8	0.759	410.8	1.329						410.8	0.504	410.8	0.941	410.8	1.291
411	0.478	411	0.759	411	1.329						411	0.504	411	0.941	411	1.29
411.2	0.479	411.2	0.759	411.2	1.33						411.2	0.504	411.2	0.941	411.2	1.289
411.4	0.479	411.4	0.759	411.4	1.33						411.4	0.505	411.4	0.94	411.4	1.288
411.6	0.48	411.6	0.759	411.6	1.329						411.6	0.505	411.6	0.94	411.6	1.287
411.8	0.48	411.8	0.76	411.8	1.329						411.8	0.505	411.8	0.94	411.8	1.285
412	0.48	412	0.759	412	1.328						412	0.505	412	0.939	412	1.284
412.2	0.481	412.2	0.759	412.2	1.328						412.2	0.505	412.2	0.939	412.2	1.283
412.4	0.481	412.4	0.759	412.4	1.327						412.4	0.505	412.4	0.938	412.4	1.281
412.6	0.482	412.6	0.759	412.6	1.327						412.6	0.505	412.6	0.938	412.6	1.28
412.8	0.482	412.8	0.759	412.8	1.327						412.8	0.505	412.8	0.937	412.8	1.278
413	0.483	413	0.759	413	1.326						413	0.504	413	0.937	413	1.276
413.2	0.483	413.2	0.759	413.2	1.325						413.2	0.504	413.2	0.936	413.2	1.275
413.4	0.483	413.4	0.758	413.4	1.324						413.4	0.504	413.4	0.936	413.4	1.273
413.6	0.483	413.6	0.758	413.6	1.323						413.6	0.504	413.6	0.935	413.6	1.271
413.8	0.483	413.8	0.758	413.8	1.322						413.8	0.504	413.8	0.934	413.8	1.27
414	0.483	414	0.758	414	1.321						414	0.504	414	0.933	414	1.268
414.2	0.484	414.2	0.758	414.2	1.32						414.2	0.504	414.2	0.933	414.2	1.266
414.4	0.484	414.4	0.757	414.4	1.319						414.4	0.504	414.4	0.932	414.4	1.264
414.6	0.485	414.6	0.757	414.6	1.318						414.6	0.504	414.6	0.931	414.6	1.262
414.8	0.485	414.8	0.757	414.8	1.317						414.8	0.504	414.8	0.93	414.8	1.26
415	0.485	415	0.757	415	1.315						415	0.504	415	0.929	415	1.257
415.2	0.485	415.2	0.756	415.2	1.314						415.2	0.503	415.2	0.928	415.2	1.255
415.4	0.485	415.4	0.756	415.4	1.312						415.4	0.503	415.4	0.928	415.4	1.253
415.6	0.485	415.6	0.755	415.6	1.311						415.6	0.503	415.6	0.927	415.6	1.25
415.8	0.486	415.8	0.755	415.8	1.31						415.8	0.503	415.8	0.926	415.8	1.248
416	0.486	416	0.755	416	1.308						416	0.503	416	0.924	416	1.245
416.2	0.486	416.2	0.755	416.2	1.306						416.2	0.502	416.2	0.923	416.2	1.243
416.4	0.486	416.4	0.755	416.4	1.305						416.4	0.502	416.4	0.922	416.4	1.24
416.6	0.486	416.6	0.754	416.6	1.303						416.6	0.502	416.6	0.92	416.6	1.237
416.8	0.486	416.8	0.753	416.8	1.301						416.8	0.501	416.8	0.919	416.8	1.234
417	0.486	417	0.753	417	1.298						417	0.501	417	0.917	417	1.231
417.2	0.486	417.2	0.752	417.2	1.296						417.2	0.5	417.2	0.915	417.2	1.227
417.4	0.486	417.4	0.751	417.4	1.294						417.4	0.5	417.4	0.914	417.4	1.224
417.6	0.486	417.6	0.751	417.6	1.291						417.6	0.5	417.6	0.913	417.6	1.221
417.8	0.486	417.8	0.75	417.8	1.289						417.8	0.499	417.8	0.911	417.8	1.217
418	0.486	418	0.749	418	1.286						418	0.499	418	0.909	418	1.214
418.2	0.486	418.2	0.748	418.2	1.284						418.2	0.498	418.2	0.908	418.2	1.211
418.4	0.487	418.4	0.748	418.4	1.281						418.4	0.498	418.4	0.906	418.4	1.207
418.6	0.487	418.6	0.747	418.6	1.278						418.6	0.498	418.6	0.904	418.6	1.204
418.8	0.487	418.8	0.746	418.8	1.276						418.8	0.497	418.8	0.903	418.8	1.2
419	0.487	419	0.746	419	1.273						419	0.497	419	0.901	419	1.197
419.2	0.487	419.2	0.745	419.2	1.27						419.2	0.496	419.2	0.899	419.2	1.193
419.4	0.487	419.4	0.744	419.4	1.267						419.4	0.496	419.4	0.898	419.4	1.189
419.6	0.486	419.6	0.743	419.6	1.264						419.6	0.495	419.6	0.896	419.6	1.186
419.8	0.486	419.8	0.742	419.8	1.261						419.8	0.495	419.8	0.894	419.8	1.181
420	0.486	420	0.741	420	1.258						420	0.494	420	0.892	420	1.177
420.2	0.486	420.2	0.74	420.2	1.254						420.2	0.493	420.2	0.89	420.2	1.173
420.4	0.486	420.4	0.739	420.4	1.251						420.4	0.493	420.4	0.888	420.4	1.169
420.6	0.486	420.6	0.739	420.6	1.248						420.6	0.492	420.6	0.886	420.6	1.165
420.8	0.486	420.8	0.738	420.8	1.244						420.8	0.492	420.8	0.883	420.8	1.161
421	0.486	421	0.737	421	1.241						421	0.491	421	0.881	421	1.156
421.2	0.485	421.2	0.735	421.2	1.237						421.2	0.491	421.2	0.878	421.2	1.152
421.4	0.485	421.4	0.734	421.4	1.233						421.4	0.49	421.4	0.876	421.4	1.147
421.6	0.485	421.6	0.733	421.6	1.229						421.6	0.489	421.6	0.874	421.6	1.143
421.8	0.485	421.8	0.732	421.8	1.226						421.8	0.488	421.8	0.871	421.8	1.138
422	0.485	422	0.731	422	1.222						422	0.488	422	0.869	422	1.133
422.2	0.484	422.2	0.73	422.2	1.218						422.2	0.487	422.2	0.866	422.2	1.129
422.4	0.484	422.4	0.728	422.4	1.215						422.4	0.486	422.4	0.864	422.4	1.124
422.6	0.484	422.6	0.727	422.6	1.21						422.6	0.485	422.6	0.861	422.6	1.119
422.8	0.484	422.8	0.725	422.8	1.207						422.8	0.485	422.8	0.859	422.8	1.114
423	0.483	423	0.724	423	1.202						423	0.484	423	0.856	423	1.109
423.2	0.483	423.2	0.723	423.2	1.198						423.2	0.483	423.2	0.854	423.2	1.104
423.4	0.482	423.4	0.722	423.4	1.194						423.4	0.483	423.4	0.851	423.4	1.1
423.6	0.482	423.6	0.721	423.6	1.19						423.6	0.482	423.6	0.848	423.6	1.095
423.8	0.482	423.8	0.719	423.8	1.185						423.8	0.481	423.8	0.846	423.8	1.09
424	0.481	424	0.718	424	1.182						424	0.48	424	0.843	424	1.085
424.2	0.481	424.2	0.717	424.2	1.177						424.2	0.479	424.2	0.841	424.2	1.08
424.4	0.481	424.4	0.715	424.4	1.173						424.4	0.478	424.4	0.838	424.4	1.075
424.6	0.481	424.6	0.714	424.6	1.168						424.6	0.478	424.6	0.835	424.6	1.069
424.8	0.48	424.8	0.712	424.8	1.163						424.8	0.477	424.8	0.832	424.8	1.064
425	0.479	425	0.711	425	1.159						425	0.476	425	0.829	425	1.059
425.2	0.479	425.2	0.709	425.2	1.154						425.2	0.475	425.2	0.826	425.2	1.053
425.4	0.478	425.4	0.707	425.4	1.15						425.4	0.474	425.4	0.823	425.4	1.048
425.6	0.478	425.6	0.706	425.6	1.145						425.6	0.473	425.6	0.82	425.6	1.043
425.8	0.477	425.8	0.704	425.8	1.14						425.8	0.472	425.8	0.817	425.8	1.037
426	0.477	426	0.703	426	1.135						426	0.471	426	0.814	426	1.032
426.2	0.477	426.2	0.701	426.2	1.13						426.2	0.47	426.2	0.811	426.2	1.026
426.4	0.476	426.4	0.699	426.4	1.125						426.4	0.469	426.4	0.808	426.4	1.021
426.6	0.475	426.6	0.697	426.6	1.12						426.6	0.468	426.6	0.805	426.6	1.015
426.8	0.475	426.8	0.696	426.8	1.115						426.8	0.467	426.8	0.801	426.8	1.01
427	0.474	427	0.694	427	1.111						427	0.466	427	0.798	427	1.004
427.2	0.473	427.2	0.693	427.2	1.105						427.2	0.465	427.2	0.795	427.2	0.999
427.4	0.473	427.4	0.691	427.4	1.1						427.4	0.464	427.4	0.791	427.4	0.993
427.6	0.472	427.6	0.689	427.6	1.095						427.6	0.463	427.6	0.788	427.6	0.987
427.8	0.472	427.8	0.687	427.8	1.089						427.8	0.462	427.8	0.785	427.8	0.982
428	0.471	428	0.685	428	1.084						428	0.461	428	0.781	428	0.976
428.2	0.47	428.2	0.683	428.2	1.079						428.2	0.46	428.2	0.778	428.2	0.97
428.4	0.47	428.4	0.682	428.4	1.074						428.4	0.459	428.4	0.775	428.4	0.965
428.6	0.469	428.6	0.68	428.6	1.068						428.6	0.458	428.6	0.772	428.6	0.959
428.8	0.468	428.8	0.678	428.8	1.063						428.8	0.456	428.8	0.768	428.8	0.954
429	0.468	429	0.676	429	1.057						429	0.455	429	0.765	429	0.948
429.2	0.467	429.2	0.674	429.2	1.052						429.2	0.454	429.2	0.761	429.2	0.943
429.4	0.466	429.4	0.672	429.4	1.047						429.4	0.453	429.4	0.758	429.4	0.937
429.6	0.465	429.6	0.67	429.6	1.041						429.6	0.452	429.6	0.754	429.6	0.931
429.8	0.465	429.8	0.668	429.8	1.036						429.8	0.451	429.8	0.751	429.8	0.926
430	0.464	430	0.666	430	1.031						430	0.45	430	0.747	430	0.92
430.2	0.463	430.2	0.664	430.2	1.025						430.2	0.448	430.2	0.743	430.2	0.914
430.4	0.462	430.4	0.662	430.4	1.019						430.4	0.447	430.4	0.74	430.4	0.909
430.6	0.461	430.6	0.66	430.6	1.013						430.6	0.446	430.6	0.736	430.6	0.903
430.8	0.46	430.8	0.658	430.8	1.007						430.8	0.444	430.8	0.732	430.8	0.897
431	0.46	431	0.656	431	1.002						431	0.443	431	0.728	431	0.892
431.2	0.459	431.2	0.654	431.2	0.996						431.2	0.442	431.2	0.725	431.2	0.886
431.4	0.458	431.4	0.652	431.4	0.99						431.4	0.441	431.4	0.721	431.4	0.881
431.6	0.457	431.6	0.649	431.6	0.985						431.6	0.44	431.6	0.718	431.6	0.875
431.8	0.456	431.8	0.647	431.8	0.979						431.8	0.438	431.8	0.714	431.8	0.87
432	0.455	432	0.645	432	0.973						432	0.437	432	0.71	432	0.864
432.2	0.454	432.2	0.643	432.2	0.967						432.2	0.436	432.2	0.707	432.2	0.858
432.4	0.453	432.4	0.641	432.4	0.961						432.4	0.434	432.4	0.703	432.4	0.852
432.6	0.452	432.6	0.638	432.6	0.956						432.6	0.433	432.6	0.699	432.6	0.847
432.8	0.451	432.8	0.636	432.8	0.95						432.8	0.432	432.8	0.695	432.8	0.841
433	0.45	433	0.634	433	0.944						433	0.431	433	0.692	433	0.835
433.2	0.449	433.2	0.631	433.2	0.938						433.2	0.429	433.2	0.688	433.2	0.829
433.4	0.448	433.4	0.629	433.4	0.932						433.4	0.428	433.4	0.684	433.4	0.824
433.6	0.447	433.6	0.626	433.6	0.927						433.6	0.426	433.6	0.68	433.6	0.818
433.8	0.445	433.8	0.624	433.8	0.921						433.8	0.425	433.8	0.676	433.8	0.812
434	0.444	434	0.621	434	0.915						434	0.423	434	0.672	434	0.807
434.2	0.443	434.2	0.619	434.2	0.909						434.2	0.422	434.2	0.668	434.2	0.801
434.4	0.442	434.4	0.617	434.4	0.903						434.4	0.42	434.4	0.664	434.4	0.795
434.6	0.441	434.6	0.614	434.6	0.897						434.6	0.419	434.6	0.66	434.6	0.789
434.8	0.44	434.8	0.612	434.8	0.891						434.8	0.417	434.8	0.656	434.8	0.783
435	0.439	435	0.609	435	0.885						435	0.416	435	0.652	435	0.777
435.2	0.437	435.2	0.607	435.2	0.88						435.2	0.414	435.2	0.648	435.2	0.771
435.4	0.436	435.4	0.604	435.4	0.874						435.4	0.413	435.4	0.644	435.4	0.766
435.6	0.435	435.6	0.602	435.6	0.868						435.6	0.411	435.6	0.64	435.6	0.76
435.8	0.433	435.8	0.599	435.8	0.862						435.8	0.409	435.8	0.636	435.8	0.754
436	0.432	436	0.597	436	0.857						436	0.408	436	0.632	436	0.749
436.2	0.431	436.2	0.594	436.2	0.851						436.2	0.406	436.2	0.629	436.2	0.744
436.4	0.43	436.4	0.592	436.4	0.846						436.4	0.405	436.4	0.625	436.4	0.739
436.6	0.429	436.6	0.589	436.6	0.841						436.6	0.403	436.6	0.622	436.6	0.733
436.8	0.428	436.8	0.587	436.8	0.835						436.8	0.402	436.8	0.618	436.8	0.728
437	0.426	437	0.584	437	0.829						437	0.4	437	0.614	437	0.723
437.2	0.425	437.2	0.582	437.2	0.823						437.2	0.399	437.2	0.61	437.2	0.717
437.4	0.424	437.4	0.579	437.4	0.818						437.4	0.397	437.4	0.606	437.4	0.712
437.6	0.422	437.6	0.577	437.6	0.812						437.6	0.396	437.6	0.602	437.6	0.706
437.8	0.421	437.8	0.574	437.8	0.807						437.8	0.394	437.8	0.598	437.8	0.701
438	0.42	438	0.571	438	0.801						438	0.393	438	0.594	438	0.695
438.2	0.418	438.2	0.569	438.2	0.795						438.2	0.391	438.2	0.59	438.2	0.69
438.4	0.417	438.4	0.566	438.4	0.789						438.4	0.389	438.4	0.587	438.4	0.685
438.6	0.416	438.6	0.563	438.6	0.784						438.6	0.387	438.6	0.583	438.6	0.679
438.8	0.414	438.8	0.561	438.8	0.778						438.8	0.386	438.8	0.579	438.8	0.674
439	0.413	439	0.558	439	0.772						439	0.384	439	0.575	439	0.669
439.2	0.411	439.2	0.555	439.2	0.767						439.2	0.383	439.2	0.571	439.2	0.665
439.4	0.41	439.4	0.553	439.4	0.761						439.4	0.381	439.4	0.568	439.4	0.66
439.6	0.408	439.6	0.55	439.6	0.756						439.6	0.379	439.6	0.564	439.6	0.655
439.8	0.407	439.8	0.547	439.8	0.751						439.8	0.378	439.8	0.56	439.8	0.65
440	0.405	440	0.545	440	0.745						440	0.376	440	0.556	440	0.645
440.2	0.404	440.2	0.542	440.2	0.74						440.2	0.375	440.2	0.552	440.2	0.64
440.4	0.403	440.4	0.539	440.4	0.734						440.4	0.373	440.4	0.549	440.4	0.635
440.6	0.401	440.6	0.536	440.6	0.729						440.6	0.371	440.6	0.545	440.6	0.63
440.8	0.4	440.8	0.534	440.8	0.723						440.8	0.37	440.8	0.541	440.8	0.626
441	0.398	441	0.531	441	0.718						441	0.368	441	0.537	441	0.621
441.2	0.397	441.2	0.528	441.2	0.713						441.2	0.367	441.2	0.534	441.2	0.616
441.4	0.395	441.4	0.525	441.4	0.708						441.4	0.365	441.4	0.53	441.4	0.612
441.6	0.394	441.6	0.523	441.6	0.703						441.6	0.363	441.6	0.527	441.6	0.607
441.8	0.392	441.8	0.52	441.8	0.698						441.8	0.362	441.8	0.523	441.8	0.603
442	0.391	442	0.518	442	0.693						442	0.36	442	0.519	442	0.599
442.2	0.389	442.2	0.515	442.2	0.688						442.2	0.358	442.2	0.516	442.2	0.595
442.4	0.388	442.4	0.512	442.4	0.683						442.4	0.357	442.4	0.512	442.4	0.59
442.6	0.386	442.6	0.509	442.6	0.678						442.6	0.355	442.6	0.509	442.6	0.586
442.8	0.385	442.8	0.507	442.8	0.673						442.8	0.353	442.8	0.505	442.8	0.581
443	0.383	443	0.504	443	0.668						443	0.352	443	0.501	443	0.577
443.2	0.382	443.2	0.501	443.2	0.663						443.2	0.35	443.2	0.498	443.2	0.572
443.4	0.38	443.4	0.499	443.4	0.658						443.4	0.348	443.4	0.494	443.4	0.568
443.6	0.379	443.6	0.496	443.6	0.654						443.6	0.347	443.6	0.49	443.6	0.564
443.8	0.377	443.8	0.493	443.8	0.649						443.8	0.345	443.8	0.487	443.8	0.56
444	0.376	444	0.491	444	0.645						444	0.343	444	0.484	444	0.555
444.2	0.374	444.2	0.488	444.2	0.64						444.2	0.342	444.2	0.48	444.2	0.551
444.4	0.373	444.4	0.485	444.4	0.636						444.4	0.34	444.4	0.477	444.4	0.547
444.6	0.371	444.6	0.483	444.6	0.631						444.6	0.338	444.6	0.473	444.6	0.543
444.8	0.369	444.8	0.48	444.8	0.626						444.8	0.337	444.8	0.469	444.8	0.539
445	0.368	445	0.477	445	0.622						445	0.335	445	0.466	445	0.534
445.2	0.366	445.2	0.475	445.2	0.617						445.2	0.333	445.2	0.462	445.2	0.53
445.4	0.364	445.4	0.472	445.4	0.613						445.4	0.331	445.4	0.459	445.4	0.526
445.6	0.363	445.6	0.469	445.6	0.609						445.6	0.33	445.6	0.455	445.6	0.522
445.8	0.361	445.8	0.466	445.8	0.604						445.8	0.328	445.8	0.452	445.8	0.518
446	0.359	446	0.463	446	0.6						446	0.326	446	0.449	446	0.514
446.2	0.358	446.2	0.46	446.2	0.595						446.2	0.324	446.2	0.445	446.2	0.51
446.4	0.356	446.4	0.458	446.4	0.591						446.4	0.323	446.4	0.442	446.4	0.506
446.6	0.355	446.6	0.455	446.6	0.587						446.6	0.321	446.6	0.439	446.6	0.502
446.8	0.353	446.8	0.453	446.8	0.583						446.8	0.319	446.8	0.435	446.8	0.498
447	0.351	447	0.45	447	0.578						447	0.318	447	0.432	447	0.494
447.2	0.35	447.2	0.447	447.2	0.574						447.2	0.316	447.2	0.428	447.2	0.491
447.4	0.348	447.4	0.444	447.4	0.57						447.4	0.315	447.4	0.425	447.4	0.487
447.6	0.346	447.6	0.442	447.6	0.566						447.6	0.313	447.6	0.422	447.6	0.483
447.8	0.345	447.8	0.439	447.8	0.562						447.8	0.311	447.8	0.419	447.8	0.48
448	0.343	448	0.436	448	0.558						448	0.31	448	0.416	448	0.476
448.2	0.341	448.2	0.434	448.2	0.554						448.2	0.308	448.2	0.413	448.2	0.472
448.4	0.34	448.4	0.431	448.4	0.55						448.4	0.306	448.4	0.409	448.4	0.468
448.6	0.338	448.6	0.428	448.6	0.546						448.6	0.304	448.6	0.406	448.6	0.465
448.8	0.336	448.8	0.426	448.8	0.542						448.8	0.303	448.8	0.403	448.8	0.462
449	0.335	449	0.423	449	0.539						449	0.301	449	0.4	449	0.458
449.2	0.333	449.2	0.421	449.2	0.535						449.2	0.3	449.2	0.397	449.2	0.455
449.4	0.332	449.4	0.418	449.4	0.531						449.4	0.298	449.4	0.394	449.4	0.451
449.6	0.33	449.6	0.415	449.6	0.527						449.6	0.297	449.6	0.391	449.6	0.448
449.8	0.329	449.8	0.413	449.8	0.523						449.8	0.295	449.8	0.388	449.8	0.444
450	0.327	450	0.41	450	0.52						450	0.294	450	0.385	450	0.441
450.2	0.326	450.2	0.408	450.2	0.516						450.2	0.292	450.2	0.382	450.2	0.438
450.4	0.324	450.4	0.405	450.4	0.513						450.4	0.291	450.4	0.38	450.4	0.435
450.6	0.322	450.6	0.402	450.6	0.509						450.6	0.289	450.6	0.377	450.6	0.431
450.8	0.32	450.8	0.4	450.8	0.506						450.8	0.288	450.8	0.374	450.8	0.428
451	0.319	451	0.397	451	0.503						451	0.286	451	0.371	451	0.425
451.2	0.317	451.2	0.395	451.2	0.499						451.2	0.284	451.2	0.369	451.2	0.422
451.4	0.315	451.4	0.392	451.4	0.496						451.4	0.283	451.4	0.366	451.4	0.419
451.6	0.314	451.6	0.39	451.6	0.492						451.6	0.282	451.6	0.363	451.6	0.416
451.8	0.312	451.8	0.388	451.8	0.489						451.8	0.28	451.8	0.361	451.8	0.414
452	0.311	452	0.385	452	0.486						452	0.279	452	0.358	452	0.411
452.2	0.309	452.2	0.383	452.2	0.482						452.2	0.277	452.2	0.355	452.2	0.408
452.4	0.307	452.4	0.38	452.4	0.479						452.4	0.275	452.4	0.353	452.4	0.405
452.6	0.306	452.6	0.378	452.6	0.476						452.6	0.274	452.6	0.35	452.6	0.402
452.8	0.304	452.8	0.376	452.8	0.472						452.8	0.272	452.8	0.347	452.8	0.399
453	0.302	453	0.373	453	0.469						453	0.271	453	0.344	453	0.395
453.2	0.301	453.2	0.371	453.2	0.466						453.2	0.269	453.2	0.342	453.2	0.392
453.4	0.3	453.4	0.368	453.4	0.463						453.4	0.268	453.4	0.34	453.4	0.39
453.6	0.298	453.6	0.366	453.6	0.46						453.6	0.266	453.6	0.337	453.6	0.387
453.8	0.297	453.8	0.364	453.8	0.457						453.8	0.264	453.8	0.335	453.8	0.384
454	0.295	454	0.361	454	0.454						454	0.263	454	0.332	454	0.381
454.2	0.293	454.2	0.359	454.2	0.451						454.2	0.261	454.2	0.33	454.2	0.379
454.4	0.292	454.4	0.357	454.4	0.448						454.4	0.26	454.4	0.327	454.4	0.376
454.6	0.29	454.6	0.355	454.6	0.445						454.6	0.259	454.6	0.325	454.6	0.373
454.8	0.289	454.8	0.352	454.8	0.442						454.8	0.257	454.8	0.323	454.8	0.371
455	0.287	455	0.35	455	0.439						455	0.256	455	0.321	455	0.368
455.2	0.286	455.2	0.348	455.2	0.436						455.2	0.254	455.2	0.318	455.2	0.366
455.4	0.284	455.4	0.345	455.4	0.434						455.4	0.253	455.4	0.316	455.4	0.363
455.6	0.282	455.6	0.343	455.6	0.431						455.6	0.251	455.6	0.314	455.6	0.361
455.8	0.281	455.8	0.341	455.8	0.428						455.8	0.25	455.8	0.311	455.8	0.358
456	0.279	456	0.338	456	0.425						456	0.248	456	0.309	456	0.356
456.2	0.278	456.2	0.336	456.2	0.422						456.2	0.247	456.2	0.307	456.2	0.353
456.4	0.276	456.4	0.334	456.4	0.42						456.4	0.246	456.4	0.305	456.4	0.351
456.6	0.275	456.6	0.332	456.6	0.417						456.6	0.244	456.6	0.302	456.6	0.349
456.8	0.273	456.8	0.329	456.8	0.414						456.8	0.243	456.8	0.3	456.8	0.346
457	0.272	457	0.327	457	0.412						457	0.241	457	0.298	457	0.344
457.2	0.27	457.2	0.325	457.2	0.409						457.2	0.24	457.2	0.296	457.2	0.341
457.4	0.269	457.4	0.323	457.4	0.407						457.4	0.239	457.4	0.294	457.4	0.339
457.6	0.267	457.6	0.321	457.6	0.405						457.6	0.237	457.6	0.292	457.6	0.337
457.8	0.266	457.8	0.319	457.8	0.402						457.8	0.236	457.8	0.29	457.8	0.335
458	0.264	458	0.317	458	0.4						458	0.234	458	0.288	458	0.333
458.2	0.263	458.2	0.315	458.2	0.397						458.2	0.233	458.2	0.286	458.2	0.33
458.4	0.261	458.4	0.313	458.4	0.395						458.4	0.232	458.4	0.284	458.4	0.328
458.6	0.26	458.6	0.311	458.6	0.392						458.6	0.23	458.6	0.282	458.6	0.326
458.8	0.258	458.8	0.309	458.8	0.39						458.8	0.229	458.8	0.28	458.8	0.324
459	0.257	459	0.307	459	0.388						459	0.228	459	0.278	459	0.321
459.2	0.255	459.2	0.305	459.2	0.385						459.2	0.226	459.2	0.276	459.2	0.319
459.4	0.254	459.4	0.303	459.4	0.383						459.4	0.225	459.4	0.275	459.4	0.318
459.6	0.252	459.6	0.301	459.6	0.381						459.6	0.224	459.6	0.273	459.6	0.316
459.8	0.251	459.8	0.299	459.8	0.379						459.8	0.222	459.8	0.271	459.8	0.314
460	0.249	460	0.297	460	0.377						460	0.221	460	0.269	460	0.312
460.2	0.248	460.2	0.296	460.2	0.375						460.2	0.22	460.2	0.267	460.2	0.31
460.4	0.247	460.4	0.294	460.4	0.373						460.4	0.218	460.4	0.266	460.4	0.308
460.6	0.245	460.6	0.292	460.6	0.371						460.6	0.217	460.6	0.264	460.6	0.306
460.8	0.244	460.8	0.29	460.8	0.368						460.8	0.216	460.8	0.262	460.8	0.304
461	0.243	461	0.288	461	0.366						461	0.215	461	0.26	461	0.302
461.2	0.241	461.2	0.286	461.2	0.364						461.2	0.213	461.2	0.258	461.2	0.3
461.4	0.24	461.4	0.284	461.4	0.362						461.4	0.212	461.4	0.257	461.4	0.298
461.6	0.238	461.6	0.283	461.6	0.36						461.6	0.211	461.6	0.255	461.6	0.296
461.8	0.237	461.8	0.281	461.8	0.359						461.8	0.21	461.8	0.254	461.8	0.294
462	0.236	462	0.279	462	0.357						462	0.208	462	0.252	462	0.293
462.2	0.234	462.2	0.277	462.2	0.355						462.2	0.207	462.2	0.25	462.2	0.291
462.4	0.233	462.4	0.276	462.4	0.353						462.4	0.206	462.4	0.249	462.4	0.289
462.6	0.232	462.6	0.274	462.6	0.351						462.6	0.205	462.6	0.247	462.6	0.287
462.8	0.23	462.8	0.272	462.8	0.35						462.8	0.204	462.8	0.246	462.8	0.285
463	0.229	463	0.27	463	0.348						463	0.203	463	0.244	463	0.284
463.2	0.228	463.2	0.269	463.2	0.346						463.2	0.201	463.2	0.243	463.2	0.282
463.4	0.226	463.4	0.267	463.4	0.344						463.4	0.2	463.4	0.241	463.4	0.281
463.6	0.225	463.6	0.265	463.6	0.342						463.6	0.199	463.6	0.24	463.6	0.279
463.8	0.224	463.8	0.264	463.8	0.34						463.8	0.198	463.8	0.238	463.8	0.277
464	0.222	464	0.262	464	0.339						464	0.197	464	0.237	464	0.276
464.2	0.221	464.2	0.26	464.2	0.337						464.2	0.196	464.2	0.235	464.2	0.274
464.4	0.22	464.4	0.259	464.4	0.335						464.4	0.195	464.4	0.234	464.4	0.273
464.6	0.219	464.6	0.257	464.6	0.334						464.6	0.194	464.6	0.232	464.6	0.271
464.8	0.217	464.8	0.256	464.8	0.332						464.8	0.193	464.8	0.231	464.8	0.269
465	0.216	465	0.254	465	0.331						465	0.192	465	0.229	465	0.268
465.2	0.215	465.2	0.252	465.2	0.329						465.2	0.19	465.2	0.228	465.2	0.266
465.4	0.214	465.4	0.251	465.4	0.327						465.4	0.189	465.4	0.227	465.4	0.265
465.6	0.212	465.6	0.249	465.6	0.326						465.6	0.188	465.6	0.225	465.6	0.263
465.8	0.211	465.8	0.247	465.8	0.324						465.8	0.187	465.8	0.224	465.8	0.262
466	0.21	466	0.246	466	0.323						466	0.186	466	0.223	466	0.26
466.2	0.209	466.2	0.244	466.2	0.321						466.2	0.185	466.2	0.221	466.2	0.259
466.4	0.207	466.4	0.243	466.4	0.32						466.4	0.184	466.4	0.22	466.4	0.257
466.6	0.206	466.6	0.241	466.6	0.318						466.6	0.183	466.6	0.219	466.6	0.256
466.8	0.205	466.8	0.24	466.8	0.317						466.8	0.182	466.8	0.218	466.8	0.254
467	0.204	467	0.238	467	0.315						467	0.18	467	0.217	467	0.253
467.2	0.203	467.2	0.237	467.2	0.314						467.2	0.179	467.2	0.215	467.2	0.251
467.4	0.202	467.4	0.235	467.4	0.313						467.4	0.178	467.4	0.214	467.4	0.249
467.6	0.201	467.6	0.234	467.6	0.311						467.6	0.177	467.6	0.212	467.6	0.248
467.8	0.199	467.8	0.232	467.8	0.309						467.8	0.176	467.8	0.211	467.8	0.246
468	0.198	468	0.23	468	0.308						468	0.175	468	0.21	468	0.245
468.2	0.197	468.2	0.229	468.2	0.307						468.2	0.174	468.2	0.209	468.2	0.244
468.4	0.195	468.4	0.227	468.4	0.305						468.4	0.173	468.4	0.208	468.4	0.242
468.6	0.194	468.6	0.226	468.6	0.304						468.6	0.172	468.6	0.206	468.6	0.241
468.8	0.193	468.8	0.224	468.8	0.302						468.8	0.171	468.8	0.205	468.8	0.239
469	0.191	469	0.223	469	0.301						469	0.17	469	0.204	469	0.238
469.2	0.19	469.2	0.221	469.2	0.299						469.2	0.169	469.2	0.202	469.2	0.236
469.4	0.189	469.4	0.22	469.4	0.298						469.4	0.168	469.4	0.201	469.4	0.235
469.6	0.188	469.6	0.218	469.6	0.297						469.6	0.166	469.6	0.2	469.6	0.233
469.8	0.187	469.8	0.217	469.8	0.296						469.8	0.165	469.8	0.199	469.8	0.232
470	0.186	470	0.215	470	0.294						470	0.165	470	0.198	470	0.231
470.2	0.185	470.2	0.214	470.2	0.293						470.2	0.163	470.2	0.197	470.2	0.229
470.4	0.183	470.4	0.212	470.4	0.292						470.4	0.163	470.4	0.196	470.4	0.228
470.6	0.182	470.6	0.211	470.6	0.29						470.6	0.162	470.6	0.194	470.6	0.227
470.8	0.181	470.8	0.21	470.8	0.289						470.8	0.161	470.8	0.193	470.8	0.225
471	0.18	471	0.208	471	0.288						471	0.16	471	0.192	471	0.224
471.2	0.179	471.2	0.207	471.2	0.286						471.2	0.159	471.2	0.191	471.2	0.223
471.4	0.178	471.4	0.206	471.4	0.285						471.4	0.158	471.4	0.19	471.4	0.221
471.6	0.177	471.6	0.204	471.6	0.284						471.6	0.157	471.6	0.189	471.6	0.22
471.8	0.176	471.8	0.203	471.8	0.283						471.8	0.156	471.8	0.188	471.8	0.219
472	0.175	472	0.202	472	0.282						472	0.155	472	0.187	472	0.218
472.2	0.174	472.2	0.201	472.2	0.281						472.2	0.154	472.2	0.186	472.2	0.217
472.4	0.173	472.4	0.199	472.4	0.28						472.4	0.153	472.4	0.185	472.4	0.215
472.6	0.172	472.6	0.198	472.6	0.278						472.6	0.153	472.6	0.184	472.6	0.214
472.8	0.171	472.8	0.197	472.8	0.277						472.8	0.152	472.8	0.183	472.8	0.213
473	0.17	473	0.196	473	0.276						473	0.151	473	0.182	473	0.212
473.2	0.168	473.2	0.194	473.2	0.275						473.2	0.15	473.2	0.181	473.2	0.211
473.4	0.167	473.4	0.193	473.4	0.274						473.4	0.149	473.4	0.18	473.4	0.21
473.6	0.166	473.6	0.192	473.6	0.273						473.6	0.148	473.6	0.179	473.6	0.208
473.8	0.165	473.8	0.191	473.8	0.272						473.8	0.147	473.8	0.178	473.8	0.207
474	0.164	474	0.189	474	0.271						474	0.146	474	0.177	474	0.206
474.2	0.163	474.2	0.188	474.2	0.27						474.2	0.145	474.2	0.176	474.2	0.205
474.4	0.162	474.4	0.187	474.4	0.268						474.4	0.144	474.4	0.175	474.4	0.204
474.6	0.162	474.6	0.186	474.6	0.267						474.6	0.144	474.6	0.174	474.6	0.202
474.8	0.161	474.8	0.185	474.8	0.267						474.8	0.143	474.8	0.173	474.8	0.201
475	0.16	475	0.183	475	0.266						475	0.142	475	0.172	475	0.2
475.2	0.159	475.2	0.182	475.2	0.265						475.2	0.141	475.2	0.172	475.2	0.199
475.4	0.158	475.4	0.181	475.4	0.264						475.4	0.141	475.4	0.171	475.4	0.198
475.6	0.157	475.6	0.18	475.6	0.263						475.6	0.14	475.6	0.17	475.6	0.197
475.8	0.156	475.8	0.179	475.8	0.261						475.8	0.139	475.8	0.169	475.8	0.196
476	0.155	476	0.178	476	0.26						476	0.138	476	0.168	476	0.195
476.2	0.154	476.2	0.177	476.2	0.259						476.2	0.137	476.2	0.168	476.2	0.194
476.4	0.153	476.4	0.176	476.4	0.258						476.4	0.136	476.4	0.167	476.4	0.193
476.6	0.152	476.6	0.174	476.6	0.257						476.6	0.136	476.6	0.166	476.6	0.192
476.8	0.151	476.8	0.173	476.8	0.256						476.8	0.135	476.8	0.165	476.8	0.191
477	0.15	477	0.172	477	0.255						477	0.134	477	0.164	477	0.19
477.2	0.149	477.2	0.171	477.2	0.254						477.2	0.133	477.2	0.163	477.2	0.189
477.4	0.149	477.4	0.17	477.4	0.253						477.4	0.133	477.4	0.162	477.4	0.188
477.6	0.148	477.6	0.169	477.6	0.253						477.6	0.132	477.6	0.162	477.6	0.187
477.8	0.147	477.8	0.168	477.8	0.252						477.8	0.131	477.8	0.161	477.8	0.185
478	0.146	478	0.167	478	0.251						478	0.13	478	0.16	478	0.184
478.2	0.145	478.2	0.166	478.2	0.25						478.2	0.129	478.2	0.159	478.2	0.183
478.4	0.144	478.4	0.165	478.4	0.249						478.4	0.129	478.4	0.158	478.4	0.182
478.6	0.143	478.6	0.164	478.6	0.248						478.6	0.128	478.6	0.158	478.6	0.181
478.8	0.143	478.8	0.163	478.8	0.247						478.8	0.127	478.8	0.157	478.8	0.18
479	0.142	479	0.162	479	0.246						479	0.126	479	0.156	479	0.179
479.2	0.141	479.2	0.161	479.2	0.245						479.2	0.126	479.2	0.155	479.2	0.178
479.4	0.14	479.4	0.16	479.4	0.244						479.4	0.125	479.4	0.155	479.4	0.177
479.6	0.139	479.6	0.159	479.6	0.243						479.6	0.124	479.6	0.154	479.6	0.176
479.8	0.138	479.8	0.158	479.8	0.243						479.8	0.124	479.8	0.153	479.8	0.175
480	0.137	480	0.157	480	0.242						480	0.123	480	0.152	480	0.174
480.2	0.137	480.2	0.156	480.2	0.241						480.2	0.122	480.2	0.152	480.2	0.173
480.4	0.136	480.4	0.155	480.4	0.24						480.4	0.121	480.4	0.151	480.4	0.172
480.6	0.135	480.6	0.154	480.6	0.239						480.6	0.121	480.6	0.15	480.6	0.171
480.8	0.134	480.8	0.153	480.8	0.238						480.8	0.12	480.8	0.15	480.8	0.171
481	0.134	481	0.152	481	0.237						481	0.119	481	0.149	481	0.17
481.2	0.133	481.2	0.151	481.2	0.236						481.2	0.119	481.2	0.148	481.2	0.169
481.4	0.132	481.4	0.151	481.4	0.236						481.4	0.118	481.4	0.148	481.4	0.168
481.6	0.131	481.6	0.15	481.6	0.235						481.6	0.117	481.6	0.147	481.6	0.167
481.8	0.131	481.8	0.148	481.8	0.234						481.8	0.117	481.8	0.146	481.8	0.166
482	0.13	482	0.147	482	0.233						482	0.116	482	0.146	482	0.165
482.2	0.129	482.2	0.146	482.2	0.232						482.2	0.116	482.2	0.145	482.2	0.164
482.4	0.128	482.4	0.145	482.4	0.231						482.4	0.115	482.4	0.144	482.4	0.163
482.6	0.127	482.6	0.145	482.6	0.231						482.6	0.114	482.6	0.144	482.6	0.163
482.8	0.127	482.8	0.144	482.8	0.23						482.8	0.114	482.8	0.143	482.8	0.162
483	0.126	483	0.143	483	0.229						483	0.113	483	0.142	483	0.161
483.2	0.125	483.2	0.142	483.2	0.228						483.2	0.113	483.2	0.141	483.2	0.16
483.4	0.124	483.4	0.141	483.4	0.227						483.4	0.112	483.4	0.141	483.4	0.159
483.6	0.123	483.6	0.141	483.6	0.226						483.6	0.111	483.6	0.14	483.6	0.158
483.8	0.123	483.8	0.14	483.8	0.225						483.8	0.11	483.8	0.14	483.8	0.157
484	0.122	484	0.139	484	0.225						484	0.11	484	0.139	484	0.156
484.2	0.122	484.2	0.138	484.2	0.224						484.2	0.109	484.2	0.138	484.2	0.156
484.4	0.121	484.4	0.137	484.4	0.223						484.4	0.108	484.4	0.137	484.4	0.155
484.6	0.121	484.6	0.136	484.6	0.222						484.6	0.108	484.6	0.137	484.6	0.154
484.8	0.12	484.8	0.136	484.8	0.222						484.8	0.107	484.8	0.136	484.8	0.153
485	0.119	485	0.135	485	0.221						485	0.106	485	0.136	485	0.152
485.2	0.118	485.2	0.134	485.2	0.22						485.2	0.106	485.2	0.135	485.2	0.151
485.4	0.117	485.4	0.133	485.4	0.219						485.4	0.105	485.4	0.134	485.4	0.151
485.6	0.117	485.6	0.132	485.6	0.218						485.6	0.105	485.6	0.134	485.6	0.15
485.8	0.116	485.8	0.132	485.8	0.218						485.8	0.104	485.8	0.133	485.8	0.149
486	0.116	486	0.131	486	0.217						486	0.104	486	0.133	486	0.148
486.2	0.115	486.2	0.13	486.2	0.216						486.2	0.103	486.2	0.132	486.2	0.147
486.4	0.114	486.4	0.129	486.4	0.216						486.4	0.103	486.4	0.132	486.4	0.146
486.6	0.114	486.6	0.128	486.6	0.215						486.6	0.102	486.6	0.131	486.6	0.145
486.8	0.113	486.8	0.128	486.8	0.214						486.8	0.102	486.8	0.131	486.8	0.145
487	0.112	487	0.127	487	0.213						487	0.101	487	0.13	487	0.144
487.2	0.112	487.2	0.126	487.2	0.213						487.2	0.101	487.2	0.129	487.2	0.143
487.4	0.111	487.4	0.126	487.4	0.212						487.4	0.1	487.4	0.129	487.4	0.142
487.6	0.11	487.6	0.125	487.6	0.211						487.6	0.1	487.6	0.128	487.6	0.142
487.8	0.11	487.8	0.124	487.8	0.211						487.8	0.099	487.8	0.128	487.8	0.141
488	0.109	488	0.123	488	0.21						488	0.098	488	0.127	488	0.14
488.2	0.109	488.2	0.123	488.2	0.209						488.2	0.098	488.2	0.126	488.2	0.139
488.4	0.108	488.4	0.122	488.4	0.209						488.4	0.097	488.4	0.126	488.4	0.139
488.6	0.107	488.6	0.121	488.6	0.208						488.6	0.097	488.6	0.125	488.6	0.138
488.8	0.107	488.8	0.121	488.8	0.207						488.8	0.096	488.8	0.125	488.8	0.137
489	0.106	489	0.12	489	0.206						489	0.096	489	0.124	489	0.136
489.2	0.106	489.2	0.119	489.2	0.205						489.2	0.095	489.2	0.124	489.2	0.135
489.4	0.105	489.4	0.118	489.4	0.205						489.4	0.094	489.4	0.123	489.4	0.135
489.6	0.105	489.6	0.118	489.6	0.204						489.6	0.094	489.6	0.122	489.6	0.134
489.8	0.104	489.8	0.117	489.8	0.203						489.8	0.093	489.8	0.122	489.8	0.133
490	0.103	490	0.116	490	0.203						490	0.093	490	0.121	490	0.133
490.2	0.103	490.2	0.116	490.2	0.202						490.2	0.093	490.2	0.121	490.2	0.132
490.4	0.102	490.4	0.115	490.4	0.201						490.4	0.092	490.4	0.12	490.4	0.131
490.6	0.101	490.6	0.114	490.6	0.2						490.6	0.092	490.6	0.12	490.6	0.13
490.8	0.101	490.8	0.114	490.8	0.2						490.8	0.091	490.8	0.119	490.8	0.13
491	0.1	491	0.113	491	0.199						491	0.091	491	0.119	491	0.129
491.2	0.1	491.2	0.112	491.2	0.198						491.2	0.09	491.2	0.118	491.2	0.128
491.4	0.099	491.4	0.112	491.4	0.198						491.4	0.09	491.4	0.118	491.4	0.128
491.6	0.099	491.6	0.111	491.6	0.197						491.6	0.089	491.6	0.117	491.6	0.127
491.8	0.098	491.8	0.11	491.8	0.196						491.8	0.089	491.8	0.117	491.8	0.126
492	0.098	492	0.11	492	0.196						492	0.088	492	0.116	492	0.126
492.2	0.097	492.2	0.109	492.2	0.195						492.2	0.088	492.2	0.116	492.2	0.125
492.4	0.097	492.4	0.108	492.4	0.194						492.4	0.087	492.4	0.115	492.4	0.124
492.6	0.096	492.6	0.108	492.6	0.194						492.6	0.087	492.6	0.115	492.6	0.123
492.8	0.096	492.8	0.107	492.8	0.193						492.8	0.086	492.8	0.114	492.8	0.122
493	0.095	493	0.106	493	0.192						493	0.086	493	0.114	493	0.122
493.2	0.095	493.2	0.106	493.2	0.192						493.2	0.086	493.2	0.113	493.2	0.121
493.4	0.094	493.4	0.105	493.4	0.191						493.4	0.085	493.4	0.113	493.4	0.12
493.6	0.094	493.6	0.105	493.6	0.19						493.6	0.085	493.6	0.112	493.6	0.12
493.8	0.093	493.8	0.104	493.8	0.19						493.8	0.084	493.8	0.112	493.8	0.12
494	0.092	494	0.104	494	0.189						494	0.084	494	0.111	494	0.119
494.2	0.092	494.2	0.103	494.2	0.189						494.2	0.083	494.2	0.11	494.2	0.118
494.4	0.091	494.4	0.103	494.4	0.188						494.4	0.083	494.4	0.11	494.4	0.118
494.6	0.091	494.6	0.102	494.6	0.187						494.6	0.082	494.6	0.109	494.6	0.117
494.8	0.091	494.8	0.101	494.8	0.187						494.8	0.082	494.8	0.109	494.8	0.116
495	0.09	495	0.101	495	0.186						495	0.082	495	0.109	495	0.116
495.2	0.09	495.2	0.1	495.2	0.185						495.2	0.081	495.2	0.108	495.2	0.115
495.4	0.089	495.4	0.099	495.4	0.184						495.4	0.081	495.4	0.108	495.4	0.115
495.6	0.089	495.6	0.099	495.6	0.183						495.6	0.081	495.6	0.108	495.6	0.114
495.8	0.088	495.8	0.098	495.8	0.183						495.8	0.08	495.8	0.107	495.8	0.114
496	0.088	496	0.098	496	0.182						496	0.08	496	0.107	496	0.113
496.2	0.087	496.2	0.097	496.2	0.181						496.2	0.079	496.2	0.106	496.2	0.112
496.4	0.087	496.4	0.097	496.4	0.181						496.4	0.079	496.4	0.106	496.4	0.111
496.6	0.086	496.6	0.096	496.6	0.18						496.6	0.079	496.6	0.105	496.6	0.111
496.8	0.086	496.8	0.096	496.8	0.18						496.8	0.078	496.8	0.105	496.8	0.111
497	0.085	497	0.095	497	0.18						497	0.078	497	0.104	497	0.11
497.2	0.085	497.2	0.095	497.2	0.179						497.2	0.078	497.2	0.104	497.2	0.109
497.4	0.084	497.4	0.094	497.4	0.178						497.4	0.077	497.4	0.103	497.4	0.109
497.6	0.084	497.6	0.094	497.6	0.178						497.6	0.077	497.6	0.103	497.6	0.108
497.8	0.084	497.8	0.094	497.8	0.177						497.8	0.076	497.8	0.102	497.8	0.107
498	0.083	498	0.093	498	0.176						498	0.076	498	0.102	498	0.107
498.2	0.083	498.2	0.093	498.2	0.175						498.2	0.076	498.2	0.101	498.2	0.106
498.4	0.082	498.4	0.092	498.4	0.175						498.4	0.075	498.4	0.101	498.4	0.105
498.6	0.082	498.6	0.091	498.6	0.174						498.6	0.075	498.6	0.1	498.6	0.105
498.8	0.081	498.8	0.091	498.8	0.174						498.8	0.074	498.8	0.1	498.8	0.105
499	0.081	499	0.091	499	0.173						499	0.074	499	0.1	499	0.104
499.2	0.081	499.2	0.09	499.2	0.173						499.2	0.073	499.2	0.099	499.2	0.104
499.4	0.08	499.4	0.09	499.4	0.172						499.4	0.073	499.4	0.099	499.4	0.103
499.6	0.08	499.6	0.089	499.6	0.171						499.6	0.073	499.6	0.098	499.6	0.102
499.8	0.08	499.8	0.089	499.8	0.171						499.8	0.073	499.8	0.098	499.8	0.102
500	0.079	500	0.088	500	0.17						500	0.072	500	0.098	500	0.101
500.2	0.079	500.2	0.088	500.2	0.17						500.2	0.072	500.2	0.097	500.2	0.101
500.4	0.078	500.4	0.087	500.4	0.169						500.4	0.072	500.4	0.097	500.4	0.101
500.6	0.078	500.6	0.087	500.6	0.168						500.6	0.071	500.6	0.096	500.6	0.1
500.8	0.078	500.8	0.086	500.8	0.168						500.8	0.071	500.8	0.096	500.8	0.1
501	0.077	501	0.086	501	0.167						501	0.071	501	0.096	501	0.099
501.2	0.077	501.2	0.085	501.2	0.167						501.2	0.07	501.2	0.095	501.2	0.098
501.4	0.076	501.4	0.085	501.4	0.166						501.4	0.07	501.4	0.095	501.4	0.098
501.6	0.076	501.6	0.085	501.6	0.166						501.6	0.07	501.6	0.094	501.6	0.097
501.8	0.076	501.8	0.084	501.8	0.165						501.8	0.069	501.8	0.094	501.8	0.097
502	0.075	502	0.084	502	0.165						502	0.069	502	0.093	502	0.096
502.2	0.075	502.2	0.084	502.2	0.164						502.2	0.069	502.2	0.093	502.2	0.096
502.4	0.075	502.4	0.083	502.4	0.164						502.4	0.068	502.4	0.092	502.4	0.095
502.6	0.074	502.6	0.083	502.6	0.163						502.6	0.068	502.6	0.092	502.6	0.095
502.8	0.074	502.8	0.083	502.8	0.163						502.8	0.067	502.8	0.092	502.8	0.094
503	0.074	503	0.082	503	0.162						503	0.067	503	0.091	503	0.094
503.2	0.073	503.2	0.082	503.2	0.161						503.2	0.067	503.2	0.091	503.2	0.094
503.4	0.073	503.4	0.081	503.4	0.161						503.4	0.067	503.4	0.091	503.4	0.093
503.6	0.072	503.6	0.081	503.6	0.161						503.6	0.066	503.6	0.09	503.6	0.093
503.8	0.072	503.8	0.081	503.8	0.16						503.8	0.066	503.8	0.09	503.8	0.092
504	0.072	504	0.08	504	0.159						504	0.066	504	0.089	504	0.092
504.2	0.071	504.2	0.08	504.2	0.159						504.2	0.065	504.2	0.089	504.2	0.091
504.4	0.071	504.4	0.079	504.4	0.158						504.4	0.065	504.4	0.089	504.4	0.091
504.6	0.071	504.6	0.079	504.6	0.158						504.6	0.065	504.6	0.088	504.6	0.091
504.8	0.07	504.8	0.078	504.8	0.157						504.8	0.065	504.8	0.088	504.8	0.09
505	0.07	505	0.078	505	0.156						505	0.064	505	0.088	505	0.09
505.2	0.07	505.2	0.078	505.2	0.156						505.2	0.064	505.2	0.087	505.2	0.089
505.4	0.069	505.4	0.077	505.4	0.155						505.4	0.064	505.4	0.087	505.4	0.089
505.6	0.069	505.6	0.077	505.6	0.155						505.6	0.064	505.6	0.086	505.6	0.088
505.8	0.069	505.8	0.076	505.8	0.154						505.8	0.064	505.8	0.086	505.8	0.088
506	0.068	506	0.076	506	0.154						506	0.063	506	0.086	506	0.087
506.2	0.068	506.2	0.076	506.2	0.153						506.2	0.063	506.2	0.085	506.2	0.087
506.4	0.068	506.4	0.075	506.4	0.153						506.4	0.063	506.4	0.085	506.4	0.086
506.6	0.067	506.6	0.075	506.6	0.152						506.6	0.062	506.6	0.084	506.6	0.086
506.8	0.067	506.8	0.074	506.8	0.152						506.8	0.062	506.8	0.084	506.8	0.085
507	0.067	507	0.074	507	0.151						507	0.061	507	0.083	507	0.085
507.2	0.066	507.2	0.074	507.2	0.15						507.2	0.061	507.2	0.083	507.2	0.085
507.4	0.066	507.4	0.073	507.4	0.15						507.4	0.061	507.4	0.083	507.4	0.084
507.6	0.066	507.6	0.073	507.6	0.149						507.6	0.061	507.6	0.082	507.6	0.084
507.8	0.066	507.8	0.073	507.8	0.149						507.8	0.06	507.8	0.082	507.8	0.083
508	0.065	508	0.073	508	0.148						508	0.06	508	0.082	508	0.083
508.2	0.065	508.2	0.072	508.2	0.148						508.2	0.06	508.2	0.081	508.2	0.083
508.4	0.065	508.4	0.072	508.4	0.147						508.4	0.06	508.4	0.081	508.4	0.082
508.6	0.064	508.6	0.072	508.6	0.147						508.6	0.059	508.6	0.081	508.6	0.082
508.8	0.064	508.8	0.071	508.8	0.146						508.8	0.059	508.8	0.08	508.8	0.082
509	0.064	509	0.071	509	0.146						509	0.059	509	0.08	509	0.081
509.2	0.063	509.2	0.071	509.2	0.145						509.2	0.059	509.2	0.079	509.2	0.081
509.4	0.063	509.4	0.07	509.4	0.145						509.4	0.058	509.4	0.079	509.4	0.08
509.6	0.063	509.6	0.07	509.6	0.144						509.6	0.058	509.6	0.079	509.6	0.08
509.8	0.063	509.8	0.07	509.8	0.144						509.8	0.058	509.8	0.078	509.8	0.079
510	0.062	510	0.069	510	0.143						510	0.058	510	0.078	510	0.079
510.2	0.062	510.2	0.069	510.2	0.143						510.2	0.057	510.2	0.078	510.2	0.079
510.4	0.062	510.4	0.069	510.4	0.142						510.4	0.057	510.4	0.077	510.4	0.079
510.6	0.061	510.6	0.068	510.6	0.142						510.6	0.057	510.6	0.077	510.6	0.078
510.8	0.061	510.8	0.068	510.8	0.141						510.8	0.057	510.8	0.077	510.8	0.078
511	0.061	511	0.068	511	0.141						511	0.056	511	0.076	511	0.077
511.2	0.06	511.2	0.067	511.2	0.14						511.2	0.056	511.2	0.076	511.2	0.077
511.4	0.06	511.4	0.067	511.4	0.14						511.4	0.056	511.4	0.076	511.4	0.077
511.6	0.06	511.6	0.067	511.6	0.139						511.6	0.056	511.6	0.075	511.6	0.076
511.8	0.06	511.8	0.066	511.8	0.139						511.8	0.055	511.8	0.075	511.8	0.076
512	0.059	512	0.066	512	0.138						512	0.055	512	0.075	512	0.076
512.2	0.059	512.2	0.066	512.2	0.137						512.2	0.055	512.2	0.074	512.2	0.075
512.4	0.059	512.4	0.065	512.4	0.137						512.4	0.055	512.4	0.074	512.4	0.075
512.6	0.058	512.6	0.065	512.6	0.136						512.6	0.055	512.6	0.074	512.6	0.075
512.8	0.058	512.8	0.065	512.8	0.136						512.8	0.055	512.8	0.073	512.8	0.074
513	0.058	513	0.065	513	0.136						513	0.054	513	0.073	513	0.074
513.2	0.058	513.2	0.064	513.2	0.135						513.2	0.054	513.2	0.073	513.2	0.074
513.4	0.057	513.4	0.064	513.4	0.135						513.4	0.054	513.4	0.072	513.4	0.073
513.6	0.057	513.6	0.064	513.6	0.134						513.6	0.054	513.6	0.072	513.6	0.073
513.8	0.057	513.8	0.063	513.8	0.134						513.8	0.053	513.8	0.072	513.8	0.073
514	0.057	514	0.063	514	0.133						514	0.053	514	0.071	514	0.072
514.2	0.056	514.2	0.063	514.2	0.133						514.2	0.053	514.2	0.071	514.2	0.072
514.4	0.056	514.4	0.063	514.4	0.133						514.4	0.053	514.4	0.071	514.4	0.072
514.6	0.056	514.6	0.062	514.6	0.132						514.6	0.052	514.6	0.07	514.6	0.071
514.8	0.056	514.8	0.062	514.8	0.132						514.8	0.052	514.8	0.07	514.8	0.071
515	0.055	515	0.062	515	0.131						515	0.052	515	0.07	515	0.07
515.2	0.055	515.2	0.061	515.2	0.131						515.2	0.052	515.2	0.069	515.2	0.07
515.4	0.055	515.4	0.061	515.4	0.13						515.4	0.052	515.4	0.069	515.4	0.07
515.6	0.055	515.6	0.061	515.6	0.13						515.6	0.051	515.6	0.069	515.6	0.07
515.8	0.054	515.8	0.061	515.8	0.129						515.8	0.051	515.8	0.068	515.8	0.069
516	0.054	516	0.06	516	0.129						516	0.051	516	0.068	516	0.069
516.2	0.054	516.2	0.06	516.2	0.128						516.2	0.051	516.2	0.068	516.2	0.069
516.4	0.054	516.4	0.06	516.4	0.128						516.4	0.051	516.4	0.068	516.4	0.068
516.6	0.053	516.6	0.059	516.6	0.127						516.6	0.051	516.6	0.067	516.6	0.068
516.8	0.053	516.8	0.059	516.8	0.127						516.8	0.05	516.8	0.067	516.8	0.068
517	0.053	517	0.059	517	0.126						517	0.05	517	0.067	517	0.068
517.2	0.053	517.2	0.059	517.2	0.126						517.2	0.05	517.2	0.066	517.2	0.067
517.4	0.052	517.4	0.059	517.4	0.125						517.4	0.05	517.4	0.066	517.4	0.067
517.6	0.052	517.6	0.058	517.6	0.125						517.6	0.05	517.6	0.066	517.6	0.067
517.8	0.052	517.8	0.058	517.8	0.124						517.8	0.049	517.8	0.065	517.8	0.066
518	0.052	518	0.058	518	0.124						518	0.049	518	0.065	518	0.066
518.2	0.051	518.2	0.058	518.2	0.123						518.2	0.049	518.2	0.065	518.2	0.066
518.4	0.051	518.4	0.057	518.4	0.123						518.4	0.049	518.4	0.064	518.4	0.065
518.6	0.051	518.6	0.057	518.6	0.122						518.6	0.048	518.6	0.064	518.6	0.065
518.8	0.051	518.8	0.057	518.8	0.122						518.8	0.048	518.8	0.064	518.8	0.065
519	0.051	519	0.056	519	0.122						519	0.048	519	0.063	519	0.065
519.2	0.05	519.2	0.056	519.2	0.121						519.2	0.048	519.2	0.063	519.2	0.064
519.4	0.05	519.4	0.056	519.4	0.121						519.4	0.048	519.4	0.063	519.4	0.064
519.6	0.05	519.6	0.056	519.6	0.12						519.6	0.048	519.6	0.063	519.6	0.064
519.8	0.05	519.8	0.056	519.8	0.12						519.8	0.048	519.8	0.062	519.8	0.064
520	0.049	520	0.055	520	0.119						520	0.047	520	0.062	520	0.063
520.2	0.049	520.2	0.055	520.2	0.119						520.2	0.047	520.2	0.062	520.2	0.063
520.4	0.049	520.4	0.055	520.4	0.118						520.4	0.047	520.4	0.061	520.4	0.063
520.6	0.049	520.6	0.055	520.6	0.118						520.6	0.047	520.6	0.061	520.6	0.062
520.8	0.049	520.8	0.055	520.8	0.118						520.8	0.047	520.8	0.061	520.8	0.062
521	0.049	521	0.054	521	0.117						521	0.047	521	0.061	521	0.062
521.2	0.048	521.2	0.054	521.2	0.117						521.2	0.046	521.2	0.061	521.2	0.062
521.4	0.048	521.4	0.054	521.4	0.117						521.4	0.046	521.4	0.06	521.4	0.062
521.6	0.048	521.6	0.054	521.6	0.116						521.6	0.046	521.6	0.06	521.6	0.061
521.8	0.048	521.8	0.054	521.8	0.116						521.8	0.046	521.8	0.06	521.8	0.061
522	0.048	522	0.054	522	0.116						522	0.046	522	0.06	522	0.061
522.2	0.048	522.2	0.053	522.2	0.115						522.2	0.046	522.2	0.059	522.2	0.06
522.4	0.047	522.4	0.053	522.4	0.115						522.4	0.046	522.4	0.059	522.4	0.06
522.6	0.047	522.6	0.053	522.6	0.114						522.6	0.045	522.6	0.059	522.6	0.06
522.8	0.047	522.8	0.052	522.8	0.114						522.8	0.045	522.8	0.058	522.8	0.06
523	0.047	523	0.052	523	0.113						523	0.045	523	0.058	523	0.059
523.2	0.047	523.2	0.052	523.2	0.113						523.2	0.045	523.2	0.058	523.2	0.059
523.4	0.046	523.4	0.052	523.4	0.112						523.4	0.044	523.4	0.057	523.4	0.059
523.6	0.046	523.6	0.052	523.6	0.112						523.6	0.044	523.6	0.057	523.6	0.059
523.8	0.046	523.8	0.051	523.8	0.111						523.8	0.044	523.8	0.057	523.8	0.058
524	0.046	524	0.051	524	0.111						524	0.044	524	0.057	524	0.058
524.2	0.045	524.2	0.051	524.2	0.11						524.2	0.044	524.2	0.057	524.2	0.058
524.4	0.045	524.4	0.051	524.4	0.11						524.4	0.044	524.4	0.056	524.4	0.058
524.6	0.045	524.6	0.05	524.6	0.11						524.6	0.044	524.6	0.056	524.6	0.057
524.8	0.045	524.8	0.05	524.8	0.109						524.8	0.043	524.8	0.056	524.8	0.057
525	0.045	525	0.05	525	0.109						525	0.043	525	0.056	525	0.057
525.2	0.044	525.2	0.05	525.2	0.109						525.2	0.043	525.2	0.055	525.2	0.057
525.4	0.044	525.4	0.05	525.4	0.108						525.4	0.043	525.4	0.055	525.4	0.056
525.6	0.044	525.6	0.049	525.6	0.108						525.6	0.043	525.6	0.055	525.6	0.056
525.8	0.044	525.8	0.049	525.8	0.107						525.8	0.043	525.8	0.055	525.8	0.056
526	0.044	526	0.049	526	0.107						526	0.043	526	0.054	526	0.056
526.2	0.044	526.2	0.049	526.2	0.106						526.2	0.043	526.2	0.054	526.2	0.055
526.4	0.044	526.4	0.049	526.4	0.106						526.4	0.042	526.4	0.054	526.4	0.055
526.6	0.043	526.6	0.048	526.6	0.106						526.6	0.042	526.6	0.054	526.6	0.055
526.8	0.043	526.8	0.048	526.8	0.105						526.8	0.042	526.8	0.053	526.8	0.055
527	0.043	527	0.048	527	0.105						527	0.042	527	0.053	527	0.055
527.2	0.043	527.2	0.048	527.2	0.105						527.2	0.042	527.2	0.053	527.2	0.054
527.4	0.043	527.4	0.048	527.4	0.104						527.4	0.042	527.4	0.053	527.4	0.054
527.6	0.042	527.6	0.048	527.6	0.104						527.6	0.041	527.6	0.052	527.6	0.054
527.8	0.042	527.8	0.047	527.8	0.104						527.8	0.041	527.8	0.052	527.8	0.053
528	0.042	528	0.047	528	0.103						528	0.041	528	0.052	528	0.053
528.2	0.042	528.2	0.047	528.2	0.103						528.2	0.041	528.2	0.052	528.2	0.053
528.4	0.041	528.4	0.047	528.4	0.102						528.4	0.041	528.4	0.052	528.4	0.053
528.6	0.041	528.6	0.047	528.6	0.102						528.6	0.041	528.6	0.051	528.6	0.053
528.8	0.041	528.8	0.046	528.8	0.102						528.8	0.041	528.8	0.051	528.8	0.053
529	0.041	529	0.046	529	0.101						529	0.041	529	0.051	529	0.052
529.2	0.041	529.2	0.046	529.2	0.101						529.2	0.04	529.2	0.051	529.2	0.052
529.4	0.041	529.4	0.046	529.4	0.101						529.4	0.04	529.4	0.051	529.4	0.052
529.6	0.041	529.6	0.046	529.6	0.1						529.6	0.04	529.6	0.051	529.6	0.052
529.8	0.041	529.8	0.046	529.8	0.1						529.8	0.04	529.8	0.05	529.8	0.052
530	0.04	530	0.046	530	0.099						530	0.04	530	0.05	530	0.051
530.2	0.04	530.2	0.046	530.2	0.099						530.2	0.04	530.2	0.05	530.2	0.051
530.4	0.04	530.4	0.045	530.4	0.099						530.4	0.04	530.4	0.05	530.4	0.051
530.6	0.04	530.6	0.045	530.6	0.098						530.6	0.04	530.6	0.049	530.6	0.051
530.8	0.04	530.8	0.045	530.8	0.098						530.8	0.04	530.8	0.049	530.8	0.051
531	0.04	531	0.045	531	0.098						531	0.04	531	0.049	531	0.05
531.2	0.04	531.2	0.045	531.2	0.097						531.2	0.04	531.2	0.049	531.2	0.05
531.4	0.04	531.4	0.045	531.4	0.097						531.4	0.04	531.4	0.048	531.4	0.05
531.6	0.04	531.6	0.044	531.6	0.097						531.6	0.039	531.6	0.048	531.6	0.049
531.8	0.04	531.8	0.044	531.8	0.096						531.8	0.039	531.8	0.048	531.8	0.049
532	0.04	532	0.044	532	0.096						532	0.039	532	0.048	532	0.049
532.2	0.039	532.2	0.044	532.2	0.096						532.2	0.039	532.2	0.048	532.2	0.049
532.4	0.039	532.4	0.044	532.4	0.095						532.4	0.039	532.4	0.047	532.4	0.049
532.6	0.039	532.6	0.044	532.6	0.095						532.6	0.038	532.6	0.047	532.6	0.049
532.8	0.039	532.8	0.044	532.8	0.095						532.8	0.038	532.8	0.047	532.8	0.048
533	0.039	533	0.044	533	0.094						533	0.038	533	0.047	533	0.048
533.2	0.038	533.2	0.043	533.2	0.094						533.2	0.038	533.2	0.047	533.2	0.048
533.4	0.038	533.4	0.043	533.4	0.094						533.4	0.038	533.4	0.047	533.4	0.048
533.6	0.038	533.6	0.043	533.6	0.094						533.6	0.038	533.6	0.046	533.6	0.048
533.8	0.038	533.8	0.043	533.8	0.093						533.8	0.038	533.8	0.046	533.8	0.047
534	0.038	534	0.043	534	0.093						534	0.038	534	0.046	534	0.047
534.2	0.038	534.2	0.042	534.2	0.093						534.2	0.038	534.2	0.046	534.2	0.047
534.4	0.038	534.4	0.042	534.4	0.092						534.4	0.038	534.4	0.046	534.4	0.047
534.6	0.037	534.6	0.042	534.6	0.092						534.6	0.038	534.6	0.046	534.6	0.047
534.8	0.037	534.8	0.042	534.8	0.092						534.8	0.038	534.8	0.045	534.8	0.047
535	0.037	535	0.042	535	0.092						535	0.037	535	0.045	535	0.047
535.2	0.037	535.2	0.041	535.2	0.091						535.2	0.037	535.2	0.045	535.2	0.047
535.4	0.037	535.4	0.041	535.4	0.091						535.4	0.037	535.4	0.045	535.4	0.046
535.6	0.036	535.6	0.041	535.6	0.091						535.6	0.037	535.6	0.045	535.6	0.046
535.8	0.036	535.8	0.041	535.8	0.09						535.8	0.037	535.8	0.044	535.8	0.046
536	0.036	536	0.041	536	0.09						536	0.037	536	0.044	536	0.046
536.2	0.036	536.2	0.041	536.2	0.09						536.2	0.037	536.2	0.044	536.2	0.045
536.4	0.036	536.4	0.04	536.4	0.089						536.4	0.036	536.4	0.044	536.4	0.045
536.6	0.036	536.6	0.04	536.6	0.089						536.6	0.036	536.6	0.044	536.6	0.045
536.8	0.036	536.8	0.04	536.8	0.089						536.8	0.036	536.8	0.044	536.8	0.045
537	0.036	537	0.04	537	0.089						537	0.036	537	0.043	537	0.045
537.2	0.036	537.2	0.04	537.2	0.088						537.2	0.036	537.2	0.043	537.2	0.045
537.4	0.036	537.4	0.04	537.4	0.088						537.4	0.036	537.4	0.043	537.4	0.045
537.6	0.036	537.6	0.04	537.6	0.088						537.6	0.036	537.6	0.043	537.6	0.045
537.8	0.036	537.8	0.04	537.8	0.088						537.8	0.036	537.8	0.043	537.8	0.044
538	0.035	538	0.04	538	0.087						538	0.036	538	0.043	538	0.044
538.2	0.035	538.2	0.04	538.2	0.087						538.2	0.036	538.2	0.043	538.2	0.044
538.4	0.035	538.4	0.04	538.4	0.087						538.4	0.036	538.4	0.043	538.4	0.044
538.6	0.035	538.6	0.039	538.6	0.086						538.6	0.035	538.6	0.042	538.6	0.044
538.8	0.035	538.8	0.039	538.8	0.086						538.8	0.035	538.8	0.042	538.8	0.044
539	0.034	539	0.039	539	0.085						539	0.035	539	0.042	539	0.043
539.2	0.034	539.2	0.039	539.2	0.085						539.2	0.035	539.2	0.042	539.2	0.043
539.4	0.034	539.4	0.039	539.4	0.085						539.4	0.035	539.4	0.042	539.4	0.043
539.6	0.034	539.6	0.039	539.6	0.084						539.6	0.035	539.6	0.042	539.6	0.043
539.8	0.034	539.8	0.039	539.8	0.084						539.8	0.035	539.8	0.041	539.8	0.043
540	0.034	540	0.038	540	0.084						540	0.035	540	0.041	540	0.043
540.2	0.034	540.2	0.038	540.2	0.084						540.2	0.035	540.2	0.041	540.2	0.043
540.4	0.034	540.4	0.038	540.4	0.084						540.4	0.035	540.4	0.041	540.4	0.042
540.6	0.034	540.6	0.038	540.6	0.083						540.6	0.034	540.6	0.041	540.6	0.042
540.8	0.034	540.8	0.038	540.8	0.083						540.8	0.034	540.8	0.041	540.8	0.042
541	0.033	541	0.038	541	0.083						541	0.034	541	0.041	541	0.042
541.2	0.033	541.2	0.038	541.2	0.082						541.2	0.034	541.2	0.04	541.2	0.042
541.4	0.033	541.4	0.037	541.4	0.082						541.4	0.034	541.4	0.04	541.4	0.042
541.6	0.033	541.6	0.037	541.6	0.082						541.6	0.034	541.6	0.04	541.6	0.041
541.8	0.033	541.8	0.037	541.8	0.082						541.8	0.034	541.8	0.04	541.8	0.041
542	0.033	542	0.037	542	0.082						542	0.034	542	0.04	542	0.041
542.2	0.033	542.2	0.037	542.2	0.081						542.2	0.033	542.2	0.039	542.2	0.041
542.4	0.033	542.4	0.037	542.4	0.081						542.4	0.033	542.4	0.039	542.4	0.041
542.6	0.032	542.6	0.037	542.6	0.081						542.6	0.033	542.6	0.039	542.6	0.041
542.8	0.032	542.8	0.037	542.8	0.08						542.8	0.033	542.8	0.039	542.8	0.04
543	0.032	543	0.036	543	0.08						543	0.033	543	0.039	543	0.04
543.2	0.032	543.2	0.036	543.2	0.08						543.2	0.033	543.2	0.039	543.2	0.04
543.4	0.032	543.4	0.036	543.4	0.08						543.4	0.033	543.4	0.038	543.4	0.04
543.6	0.032	543.6	0.036	543.6	0.079						543.6	0.033	543.6	0.038	543.6	0.04
543.8	0.032	543.8	0.036	543.8	0.079						543.8	0.032	543.8	0.038	543.8	0.04
544	0.032	544	0.036	544	0.079						544	0.032	544	0.038	544	0.04
544.2	0.032	544.2	0.036	544.2	0.079						544.2	0.032	544.2	0.038	544.2	0.04
544.4	0.032	544.4	0.036	544.4	0.078						544.4	0.032	544.4	0.038	544.4	0.039
544.6	0.032	544.6	0.036	544.6	0.078						544.6	0.033	544.6	0.038	544.6	0.039
544.8	0.031	544.8	0.036	544.8	0.078						544.8	0.032	544.8	0.038	544.8	0.039
545	0.031	545	0.036	545	0.077						545	0.032	545	0.038	545	0.039
545.2	0.031	545.2	0.036	545.2	0.077						545.2	0.032	545.2	0.038	545.2	0.039
545.4	0.031	545.4	0.035	545.4	0.077						545.4	0.032	545.4	0.038	545.4	0.039
545.6	0.031	545.6	0.035	545.6	0.077						545.6	0.032	545.6	0.037	545.6	0.039
545.8	0.031	545.8	0.035	545.8	0.077						545.8	0.032	545.8	0.037	545.8	0.039
546	0.031	546	0.035	546	0.077						546	0.032	546	0.037	546	0.039
546.2	0.031	546.2	0.035	546.2	0.076						546.2	0.032	546.2	0.037	546.2	0.039
546.4	0.031	546.4	0.035	546.4	0.076						546.4	0.032	546.4	0.036	546.4	0.038
546.6	0.031	546.6	0.035	546.6	0.076						546.6	0.032	546.6	0.036	546.6	0.038
546.8	0.031	546.8	0.034	546.8	0.075						546.8	0.031	546.8	0.036	546.8	0.038
547	0.03	547	0.034	547	0.075						547	0.031	547	0.036	547	0.038
547.2	0.03	547.2	0.034	547.2	0.075						547.2	0.031	547.2	0.036	547.2	0.038
547.4	0.03	547.4	0.034	547.4	0.075						547.4	0.031	547.4	0.036	547.4	0.037
547.6	0.03	547.6	0.034	547.6	0.075						547.6	0.031	547.6	0.036	547.6	0.037
547.8	0.03	547.8	0.034	547.8	0.074						547.8	0.031	547.8	0.036	547.8	0.037
548	0.03	548	0.034	548	0.074						548	0.031	548	0.036	548	0.037
548.2	0.03	548.2	0.034	548.2	0.074						548.2	0.031	548.2	0.035	548.2	0.037
548.4	0.03	548.4	0.034	548.4	0.074						548.4	0.031	548.4	0.035	548.4	0.037
548.6	0.03	548.6	0.034	548.6	0.074						548.6	0.031	548.6	0.035	548.6	0.037
548.8	0.03	548.8	0.034	548.8	0.073						548.8	0.031	548.8	0.035	548.8	0.037
549	0.03	549	0.034	549	0.073						549	0.031	549	0.035	549	0.037
549.2	0.03	549.2	0.033	549.2	0.073						549.2	0.031	549.2	0.035	549.2	0.037
549.4	0.03	549.4	0.033	549.4	0.073						549.4	0.03	549.4	0.035	549.4	0.037
549.6	0.03	549.6	0.033	549.6	0.073						549.6	0.03	549.6	0.035	549.6	0.037
549.8	0.029	549.8	0.033	549.8	0.072						549.8	0.03	549.8	0.035	549.8	0.036
550	0.029	550	0.033	550	0.072						550	0.03	550	0.035	550	0.036
550.2	0.029	550.2	0.033	550.2	0.072						550.2	0.03	550.2	0.034	550.2	0.036
550.4	0.029	550.4	0.033	550.4	0.072						550.4	0.03	550.4	0.034	550.4	0.036
550.6	0.029	550.6	0.033	550.6	0.071						550.6	0.03	550.6	0.034	550.6	0.036
550.8	0.029	550.8	0.033	550.8	0.071						550.8	0.03	550.8	0.034	550.8	0.036
551	0.029	551	0.033	551	0.071						551	0.03	551	0.034	551	0.036
551.2	0.029	551.2	0.032	551.2	0.071						551.2	0.03	551.2	0.034	551.2	0.035
551.4	0.029	551.4	0.032	551.4	0.071						551.4	0.03	551.4	0.033	551.4	0.035
551.6	0.029	551.6	0.032	551.6	0.07						551.6	0.03	551.6	0.033	551.6	0.035
551.8	0.028	551.8	0.032	551.8	0.07						551.8	0.029	551.8	0.033	551.8	0.035
552	0.028	552	0.032	552	0.07						552	0.029	552	0.033	552	0.035
552.2	0.028	552.2	0.032	552.2	0.07						552.2	0.029	552.2	0.033	552.2	0.035
552.4	0.028	552.4	0.032	552.4	0.07						552.4	0.029	552.4	0.033	552.4	0.035
552.6	0.028	552.6	0.032	552.6	0.069						552.6	0.029	552.6	0.033	552.6	0.035
552.8	0.028	552.8	0.032	552.8	0.069						552.8	0.029	552.8	0.033	552.8	0.035
553	0.028	553	0.032	553	0.069						553	0.029	553	0.033	553	0.035
553.2	0.028	553.2	0.032	553.2	0.069						553.2	0.029	553.2	0.032	553.2	0.034
553.4	0.028	553.4	0.032	553.4	0.069						553.4	0.029	553.4	0.032	553.4	0.034
553.6	0.028	553.6	0.031	553.6	0.068						553.6	0.029	553.6	0.032	553.6	0.034
553.8	0.027	553.8	0.031	553.8	0.068						553.8	0.029	553.8	0.032	553.8	0.034
554	0.027	554	0.031	554	0.068						554	0.029	554	0.032	554	0.034
554.2	0.027	554.2	0.031	554.2	0.068						554.2	0.029	554.2	0.032	554.2	0.034
554.4	0.027	554.4	0.031	554.4	0.068						554.4	0.029	554.4	0.032	554.4	0.034
554.6	0.027	554.6	0.031	554.6	0.067						554.6	0.029	554.6	0.032	554.6	0.034
554.8	0.027	554.8	0.031	554.8	0.067						554.8	0.029	554.8	0.032	554.8	0.034
555	0.027	555	0.031	555	0.067						555	0.029	555	0.032	555	0.034
555.2	0.027	555.2	0.031	555.2	0.067						555.2	0.029	555.2	0.031	555.2	0.034
555.4	0.027	555.4	0.031	555.4	0.067						555.4	0.028	555.4	0.031	555.4	0.033
555.6	0.027	555.6	0.031	555.6	0.066						555.6	0.028	555.6	0.031	555.6	0.033
555.8	0.026	555.8	0.03	555.8	0.066						555.8	0.028	555.8	0.031	555.8	0.033
556	0.026	556	0.03	556	0.066						556	0.028	556	0.031	556	0.033
556.2	0.026	556.2	0.03	556.2	0.066						556.2	0.029	556.2	0.031	556.2	0.033
556.4	0.026	556.4	0.03	556.4	0.066						556.4	0.029	556.4	0.031	556.4	0.033
556.6	0.026	556.6	0.03	556.6	0.065						556.6	0.028	556.6	0.031	556.6	0.033
556.8	0.026	556.8	0.03	556.8	0.065						556.8	0.028	556.8	0.031	556.8	0.033
557	0.026	557	0.03	557	0.065						557	0.028	557	0.031	557	0.033
557.2	0.026	557.2	0.03	557.2	0.065						557.2	0.028	557.2	0.031	557.2	0.033
557.4	0.026	557.4	0.03	557.4	0.064						557.4	0.028	557.4	0.031	557.4	0.033
557.6	0.026	557.6	0.03	557.6	0.064						557.6	0.028	557.6	0.031	557.6	0.032
557.8	0.026	557.8	0.029	557.8	0.064						557.8	0.028	557.8	0.031	557.8	0.032
558	0.025	558	0.029	558	0.064						558	0.028	558	0.03	558	0.032
558.2	0.025	558.2	0.029	558.2	0.064						558.2	0.027	558.2	0.03	558.2	0.032
558.4	0.025	558.4	0.029	558.4	0.063						558.4	0.027	558.4	0.03	558.4	0.032
558.6	0.025	558.6	0.029	558.6	0.063						558.6	0.027	558.6	0.03	558.6	0.032
558.8	0.025	558.8	0.029	558.8	0.063						558.8	0.027	558.8	0.03	558.8	0.032
559	0.025	559	0.029	559	0.063						559	0.027	559	0.03	559	0.032
559.2	0.025	559.2	0.029	559.2	0.062						559.2	0.027	559.2	0.03	559.2	0.032
559.4	0.025	559.4	0.029	559.4	0.062						559.4	0.027	559.4	0.03	559.4	0.032
559.6	0.025	559.6	0.029	559.6	0.062						559.6	0.027	559.6	0.03	559.6	0.031
559.8	0.025	559.8	0.028	559.8	0.062						559.8	0.027	559.8	0.029	559.8	0.031
560	0.025	560	0.028	560	0.062						560	0.027	560	0.03	560	0.031
560.2	0.025	560.2	0.028	560.2	0.062						560.2	0.027	560.2	0.029	560.2	0.031
560.4	0.025	560.4	0.028	560.4	0.061						560.4	0.027	560.4	0.029	560.4	0.031
560.6	0.024	560.6	0.028	560.6	0.061						560.6	0.027	560.6	0.029	560.6	0.031
560.8	0.024	560.8	0.028	560.8	0.061						560.8	0.027	560.8	0.029	560.8	0.031
561	0.024	561	0.028	561	0.061						561	0.026	561	0.029	561	0.031
561.2	0.024	561.2	0.028	561.2	0.061						561.2	0.026	561.2	0.029	561.2	0.031
561.4	0.024	561.4	0.028	561.4	0.061						561.4	0.026	561.4	0.029	561.4	0.031
561.6	0.024	561.6	0.028	561.6	0.06						561.6	0.026	561.6	0.029	561.6	0.031
561.8	0.024	561.8	0.028	561.8	0.06						561.8	0.026	561.8	0.029	561.8	0.031
562	0.024	562	0.028	562	0.06						562	0.026	562	0.029	562	0.03
562.2	0.024	562.2	0.028	562.2	0.06						562.2	0.026	562.2	0.029	562.2	0.03
562.4	0.024	562.4	0.027	562.4	0.06						562.4	0.026	562.4	0.029	562.4	0.03
562.6	0.024	562.6	0.027	562.6	0.059						562.6	0.026	562.6	0.028	562.6	0.03
562.8	0.024	562.8	0.027	562.8	0.059						562.8	0.026	562.8	0.028	562.8	0.03
563	0.023	563	0.027	563	0.059						563	0.026	563	0.028	563	0.03
563.2	0.023	563.2	0.027	563.2	0.059						563.2	0.026	563.2	0.028	563.2	0.03
563.4	0.023	563.4	0.027	563.4	0.059						563.4	0.026	563.4	0.028	563.4	0.03
563.6	0.023	563.6	0.027	563.6	0.059						563.6	0.026	563.6	0.028	563.6	0.03
563.8	0.023	563.8	0.027	563.8	0.059						563.8	0.026	563.8	0.028	563.8	0.03
564	0.023	564	0.027	564	0.058						564	0.026	564	0.028	564	0.03
564.2	0.023	564.2	0.027	564.2	0.058						564.2	0.026	564.2	0.028	564.2	0.029
564.4	0.023	564.4	0.027	564.4	0.058						564.4	0.025	564.4	0.028	564.4	0.029
564.6	0.023	564.6	0.027	564.6	0.058						564.6	0.025	564.6	0.028	564.6	0.029
564.8	0.023	564.8	0.027	564.8	0.058						564.8	0.025	564.8	0.028	564.8	0.029
565	0.023	565	0.026	565	0.058						565	0.025	565	0.028	565	0.029
565.2	0.023	565.2	0.026	565.2	0.058						565.2	0.025	565.2	0.028	565.2	0.029
565.4	0.023	565.4	0.026	565.4	0.057						565.4	0.025	565.4	0.028	565.4	0.029
565.6	0.023	565.6	0.026	565.6	0.057						565.6	0.025	565.6	0.027	565.6	0.029
565.8	0.023	565.8	0.026	565.8	0.057						565.8	0.025	565.8	0.027	565.8	0.029
566	0.023	566	0.026	566	0.057						566	0.025	566	0.027	566	0.029
566.2	0.022	566.2	0.026	566.2	0.057						566.2	0.025	566.2	0.027	566.2	0.029
566.4	0.022	566.4	0.026	566.4	0.057						566.4	0.025	566.4	0.027	566.4	0.029
566.6	0.022	566.6	0.026	566.6	0.056						566.6	0.025	566.6	0.027	566.6	0.029
566.8	0.022	566.8	0.026	566.8	0.056						566.8	0.025	566.8	0.027	566.8	0.028
567	0.022	567	0.026	567	0.056						567	0.025	567	0.027	567	0.028
567.2	0.022	567.2	0.026	567.2	0.056						567.2	0.025	567.2	0.027	567.2	0.028
567.4	0.022	567.4	0.025	567.4	0.056						567.4	0.025	567.4	0.027	567.4	0.028
567.6	0.022	567.6	0.025	567.6	0.055						567.6	0.025	567.6	0.027	567.6	0.028
567.8	0.022	567.8	0.025	567.8	0.055						567.8	0.025	567.8	0.027	567.8	0.028
568	0.022	568	0.025	568	0.055						568	0.025	568	0.026	568	0.028
568.2	0.022	568.2	0.025	568.2	0.055						568.2	0.024	568.2	0.026	568.2	0.028
568.4	0.022	568.4	0.025	568.4	0.055						568.4	0.024	568.4	0.026	568.4	0.028
568.6	0.022	568.6	0.025	568.6	0.055						568.6	0.024	568.6	0.026	568.6	0.028
568.8	0.022	568.8	0.025	568.8	0.054						568.8	0.024	568.8	0.026	568.8	0.028
569	0.022	569	0.025	569	0.054						569	0.024	569	0.026	569	0.028
569.2	0.022	569.2	0.025	569.2	0.054						569.2	0.024	569.2	0.026	569.2	0.028
569.4	0.021	569.4	0.025	569.4	0.054						569.4	0.024	569.4	0.026	569.4	0.028
569.6	0.021	569.6	0.025	569.6	0.054						569.6	0.024	569.6	0.026	569.6	0.027
569.8	0.021	569.8	0.025	569.8	0.054						569.8	0.024	569.8	0.026	569.8	0.027
570	0.021	570	0.025	570	0.054						570	0.024	570	0.026	570	0.027
570.2	0.021	570.2	0.025	570.2	0.054						570.2	0.024	570.2	0.026	570.2	0.027
570.4	0.021	570.4	0.025	570.4	0.053						570.4	0.024	570.4	0.026	570.4	0.027
570.6	0.021	570.6	0.025	570.6	0.053						570.6	0.024	570.6	0.026	570.6	0.027
570.8	0.021	570.8	0.025	570.8	0.053						570.8	0.024	570.8	0.026	570.8	0.027
571	0.021	571	0.024	571	0.053						571	0.024	571	0.026	571	0.027
571.2	0.021	571.2	0.024	571.2	0.053						571.2	0.024	571.2	0.026	571.2	0.027
571.4	0.021	571.4	0.024	571.4	0.053						571.4	0.024	571.4	0.026	571.4	0.027
571.6	0.021	571.6	0.024	571.6	0.053						571.6	0.024	571.6	0.026	571.6	0.027
571.8	0.021	571.8	0.024	571.8	0.053						571.8	0.024	571.8	0.026	571.8	0.027
572	0.021	572	0.024	572	0.053						572	0.024	572	0.026	572	0.027
572.2	0.021	572.2	0.024	572.2	0.052						572.2	0.023	572.2	0.025	572.2	0.027
572.4	0.021	572.4	0.024	572.4	0.052						572.4	0.023	572.4	0.025	572.4	0.027
572.6	0.021	572.6	0.024	572.6	0.052						572.6	0.023	572.6	0.025	572.6	0.027
572.8	0.02	572.8	0.024	572.8	0.052						572.8	0.023	572.8	0.025	572.8	0.027
573	0.02	573	0.024	573	0.052						573	0.023	573	0.025	573	0.027
573.2	0.02	573.2	0.024	573.2	0.052						573.2	0.023	573.2	0.025	573.2	0.026
573.4	0.02	573.4	0.023	573.4	0.052						573.4	0.023	573.4	0.025	573.4	0.026
573.6	0.02	573.6	0.023	573.6	0.051						573.6	0.023	573.6	0.025	573.6	0.026
573.8	0.02	573.8	0.023	573.8	0.051						573.8	0.023	573.8	0.025	573.8	0.026
574	0.02	574	0.023	574	0.051						574	0.023	574	0.025	574	0.026
574.2	0.02	574.2	0.023	574.2	0.051						574.2	0.023	574.2	0.025	574.2	0.026
574.4	0.02	574.4	0.023	574.4	0.051						574.4	0.023	574.4	0.025	574.4	0.026
574.6	0.02	574.6	0.023	574.6	0.051						574.6	0.023	574.6	0.024	574.6	0.026
574.8	0.02	574.8	0.023	574.8	0.051						574.8	0.023	574.8	0.024	574.8	0.026
575	0.02	575	0.023	575	0.051						575	0.023	575	0.024	575	0.026
575.2	0.02	575.2	0.023	575.2	0.05						575.2	0.023	575.2	0.024	575.2	0.026
575.4	0.02	575.4	0.023	575.4	0.05						575.4	0.023	575.4	0.024	575.4	0.026
575.6	0.02	575.6	0.023	575.6	0.05						575.6	0.023	575.6	0.024	575.6	0.026
575.8	0.02	575.8	0.023	575.8	0.05						575.8	0.023	575.8	0.024	575.8	0.026
576	0.02	576	0.023	576	0.05						576	0.023	576	0.024	576	0.026
576.2	0.02	576.2	0.022	576.2	0.05						576.2	0.022	576.2	0.024	576.2	0.026
576.4	0.02	576.4	0.022	576.4	0.05						576.4	0.022	576.4	0.024	576.4	0.026
576.6	0.02	576.6	0.022	576.6	0.05						576.6	0.022	576.6	0.024	576.6	0.026
576.8	0.02	576.8	0.022	576.8	0.05						576.8	0.022	576.8	0.024	576.8	0.026
577	0.02	577	0.022	577	0.049						577	0.022	577	0.024	577	0.025
577.2	0.019	577.2	0.022	577.2	0.049						577.2	0.022	577.2	0.024	577.2	0.025
577.4	0.019	577.4	0.022	577.4	0.049						577.4	0.022	577.4	0.024	577.4	0.025
577.6	0.019	577.6	0.022	577.6	0.049						577.6	0.022	577.6	0.024	577.6	0.025
577.8	0.019	577.8	0.022	577.8	0.049						577.8	0.022	577.8	0.024	577.8	0.025
578	0.019	578	0.022	578	0.049						578	0.022	578	0.023	578	0.025
578.2	0.019	578.2	0.022	578.2	0.049						578.2	0.022	578.2	0.023	578.2	0.025
578.4	0.019	578.4	0.022	578.4	0.049						578.4	0.022	578.4	0.023	578.4	0.025
578.6	0.019	578.6	0.022	578.6	0.049						578.6	0.022	578.6	0.023	578.6	0.025
578.8	0.019	578.8	0.022	578.8	0.049						578.8	0.022	578.8	0.023	578.8	0.025
579	0.019	579	0.022	579	0.049						579	0.022	579	0.023	579	0.025
579.2	0.019	579.2	0.022	579.2	0.048						579.2	0.022	579.2	0.023	579.2	0.025
579.4	0.019	579.4	0.021	579.4	0.048						579.4	0.022	579.4	0.023	579.4	0.025
579.6	0.019	579.6	0.021	579.6	0.048						579.6	0.022	579.6	0.023	579.6	0.025
579.8	0.019	579.8	0.021	579.8	0.048						579.8	0.022	579.8	0.023	579.8	0.024
580	0.019	580	0.021	580	0.048						580	0.022	580	0.023	580	0.024
580.2	0.019	580.2	0.021	580.2	0.048						580.2	0.021	580.2	0.023	580.2	0.024
580.4	0.019	580.4	0.021	580.4	0.048						580.4	0.021	580.4	0.023	580.4	0.024
580.6	0.019	580.6	0.021	580.6	0.048						580.6	0.021	580.6	0.023	580.6	0.024
580.8	0.019	580.8	0.021	580.8	0.048						580.8	0.021	580.8	0.023	580.8	0.024
581	0.019	581	0.021	581	0.048						581	0.021	581	0.023	581	0.024
581.2	0.019	581.2	0.021	581.2	0.048						581.2	0.021	581.2	0.022	581.2	0.024
581.4	0.019	581.4	0.021	581.4	0.047						581.4	0.021	581.4	0.022	581.4	0.024
581.6	0.019	581.6	0.021	581.6	0.047						581.6	0.021	581.6	0.022	581.6	0.024
581.8	0.019	581.8	0.021	581.8	0.047						581.8	0.021	581.8	0.022	581.8	0.024
582	0.019	582	0.021	582	0.047						582	0.021	582	0.022	582	0.024
582.2	0.019	582.2	0.021	582.2	0.047						582.2	0.021	582.2	0.022	582.2	0.024
582.4	0.019	582.4	0.021	582.4	0.047						582.4	0.021	582.4	0.022	582.4	0.024
582.6	0.018	582.6	0.021	582.6	0.047						582.6	0.021	582.6	0.022	582.6	0.024
582.8	0.018	582.8	0.021	582.8	0.047						582.8	0.021	582.8	0.022	582.8	0.024
583	0.018	583	0.021	583	0.047						583	0.021	583	0.022	583	0.023
583.2	0.018	583.2	0.021	583.2	0.047						583.2	0.021	583.2	0.022	583.2	0.023
583.4	0.018	583.4	0.021	583.4	0.047						583.4	0.021	583.4	0.022	583.4	0.023
583.6	0.018	583.6	0.02	583.6	0.047						583.6	0.021	583.6	0.022	583.6	0.023
583.8	0.018	583.8	0.02	583.8	0.046						583.8	0.021	583.8	0.022	583.8	0.023
584	0.018	584	0.02	584	0.046						584	0.021	584	0.022	584	0.023
584.2	0.018	584.2	0.02	584.2	0.046						584.2	0.021	584.2	0.022	584.2	0.023
584.4	0.018	584.4	0.02	584.4	0.046						584.4	0.021	584.4	0.021	584.4	0.023
584.6	0.018	584.6	0.02	584.6	0.046						584.6	0.021	584.6	0.021	584.6	0.023
584.8	0.018	584.8	0.02	584.8	0.046						584.8	0.021	584.8	0.021	584.8	0.023
585	0.018	585	0.02	585	0.046						585	0.02	585	0.021	585	0.023
585.2	0.018	585.2	0.02	585.2	0.046						585.2	0.02	585.2	0.021	585.2	0.023
585.4	0.018	585.4	0.02	585.4	0.046						585.4	0.02	585.4	0.021	585.4	0.023
585.6	0.018	585.6	0.02	585.6	0.046						585.6	0.02	585.6	0.021	585.6	0.022
585.8	0.018	585.8	0.02	585.8	0.045						585.8	0.02	585.8	0.021	585.8	0.022
586	0.018	586	0.02	586	0.045						586	0.02	586	0.021	586	0.022
586.2	0.018	586.2	0.02	586.2	0.045						586.2	0.02	586.2	0.021	586.2	0.022
586.4	0.018	586.4	0.02	586.4	0.045						586.4	0.02	586.4	0.021	586.4	0.022
586.6	0.018	586.6	0.02	586.6	0.045						586.6	0.02	586.6	0.021	586.6	0.022
586.8	0.018	586.8	0.02	586.8	0.045						586.8	0.02	586.8	0.021	586.8	0.022
587	0.018	587	0.02	587	0.045						587	0.02	587	0.021	587	0.022
587.2	0.018	587.2	0.02	587.2	0.045						587.2	0.02	587.2	0.021	587.2	0.022
587.4	0.018	587.4	0.02	587.4	0.045						587.4	0.02	587.4	0.021	587.4	0.022
587.6	0.018	587.6	0.02	587.6	0.045						587.6	0.02	587.6	0.021	587.6	0.022
587.8	0.018	587.8	0.019	587.8	0.045						587.8	0.02	587.8	0.021	587.8	0.022
588	0.018	588	0.019	588	0.045						588	0.02	588	0.021	588	0.022
588.2	0.018	588.2	0.019	588.2	0.045						588.2	0.02	588.2	0.02	588.2	0.022
588.4	0.018	588.4	0.019	588.4	0.044						588.4	0.02	588.4	0.02	588.4	0.021
588.6	0.017	588.6	0.019	588.6	0.044						588.6	0.02	588.6	0.02	588.6	0.021
588.8	0.017	588.8	0.019	588.8	0.044						588.8	0.02	588.8	0.02	588.8	0.021
589	0.017	589	0.019	589	0.044						589	0.02	589	0.02	589	0.021
589.2	0.017	589.2	0.019	589.2	0.044						589.2	0.02	589.2	0.02	589.2	0.021
589.4	0.017	589.4	0.019	589.4	0.044						589.4	0.02	589.4	0.02	589.4	0.021
589.6	0.017	589.6	0.019	589.6	0.044						589.6	0.02	589.6	0.02	589.6	0.021
589.8	0.017	589.8	0.019	589.8	0.044						589.8	0.019	589.8	0.02	589.8	0.021
590	0.017	590	0.019	590	0.044						590	0.019	590	0.02	590	0.021
590.2	0.017	590.2	0.019	590.2	0.044						590.2	0.019	590.2	0.02	590.2	0.021
590.4	0.017	590.4	0.019	590.4	0.044						590.4	0.019	590.4	0.02	590.4	0.021
590.6	0.017	590.6	0.019	590.6	0.044						590.6	0.019	590.6	0.02	590.6	0.021
590.8	0.017	590.8	0.019	590.8	0.043						590.8	0.019	590.8	0.02	590.8	0.021
591	0.017	591	0.019	591	0.043						591	0.019	591	0.02	591	0.021
591.2	0.017	591.2	0.019	591.2	0.043						591.2	0.019	591.2	0.02	591.2	0.021
591.4	0.017	591.4	0.019	591.4	0.043						591.4	0.019	591.4	0.02	591.4	0.021
591.6	0.017	591.6	0.019	591.6	0.043						591.6	0.019	591.6	0.02	591.6	0.02
591.8	0.017	591.8	0.019	591.8	0.043						591.8	0.019	591.8	0.02	591.8	0.02
592	0.017	592	0.018	592	0.043						592	0.019	592	0.02	592	0.02
592.2	0.017	592.2	0.019	592.2	0.043						592.2	0.019	592.2	0.02	592.2	0.02
592.4	0.017	592.4	0.018	592.4	0.043						592.4	0.019	592.4	0.02	592.4	0.02
592.6	0.017	592.6	0.018	592.6	0.043						592.6	0.019	592.6	0.019	592.6	0.02
592.8	0.017	592.8	0.018	592.8	0.043						592.8	0.019	592.8	0.019	592.8	0.02
593	0.017	593	0.018	593	0.043						593	0.019	593	0.019	593	0.02
593.2	0.017	593.2	0.018	593.2	0.043						593.2	0.019	593.2	0.019	593.2	0.02
593.4	0.017	593.4	0.018	593.4	0.043						593.4	0.019	593.4	0.019	593.4	0.02
593.6	0.016	593.6	0.018	593.6	0.042						593.6	0.019	593.6	0.019	593.6	0.02
593.8	0.016	593.8	0.018	593.8	0.042						593.8	0.019	593.8	0.019	593.8	0.02
594	0.016	594	0.018	594	0.042						594	0.019	594	0.019	594	0.02
594.2	0.016	594.2	0.018	594.2	0.042						594.2	0.019	594.2	0.019	594.2	0.02
594.4	0.016	594.4	0.018	594.4	0.042						594.4	0.019	594.4	0.019	594.4	0.02
594.6	0.016	594.6	0.018	594.6	0.042						594.6	0.019	594.6	0.019	594.6	0.02
594.8	0.016	594.8	0.018	594.8	0.042						594.8	0.019	594.8	0.019	594.8	0.02
595	0.016	595	0.018	595	0.042						595	0.019	595	0.019	595	0.02
595.2	0.016	595.2	0.018	595.2	0.042						595.2	0.019	595.2	0.019	595.2	0.02
595.4	0.016	595.4	0.018	595.4	0.042						595.4	0.018	595.4	0.019	595.4	0.02
595.6	0.016	595.6	0.018	595.6	0.042						595.6	0.018	595.6	0.019	595.6	0.019
595.8	0.016	595.8	0.018	595.8	0.042						595.8	0.018	595.8	0.019	595.8	0.019
596	0.016	596	0.018	596	0.042						596	0.018	596	0.019	596	0.019
596.2	0.016	596.2	0.018	596.2	0.042						596.2	0.018	596.2	0.018	596.2	0.019
596.4	0.016	596.4	0.018	596.4	0.042						596.4	0.018	596.4	0.018	596.4	0.019
596.6	0.016	596.6	0.018	596.6	0.042						596.6	0.018	596.6	0.018	596.6	0.019
596.8	0.016	596.8	0.018	596.8	0.041						596.8	0.018	596.8	0.018	596.8	0.019
597	0.016	597	0.018	597	0.041						597	0.018	597	0.018	597	0.019
597.2	0.016	597.2	0.018	597.2	0.041						597.2	0.018	597.2	0.018	597.2	0.019
597.4	0.016	597.4	0.017	597.4	0.041						597.4	0.018	597.4	0.018	597.4	0.019
597.6	0.016	597.6	0.017	597.6	0.041						597.6	0.018	597.6	0.018	597.6	0.019
597.8	0.016	597.8	0.017	597.8	0.041						597.8	0.018	597.8	0.018	597.8	0.019
598	0.016	598	0.017	598	0.041						598	0.018	598	0.018	598	0.019
598.2	0.016	598.2	0.017	598.2	0.041						598.2	0.018	598.2	0.018	598.2	0.019
598.4	0.016	598.4	0.017	598.4	0.041						598.4	0.018	598.4	0.018	598.4	0.019
598.6	0.015	598.6	0.017	598.6	0.041						598.6	0.018	598.6	0.018	598.6	0.019
598.8	0.015	598.8	0.017	598.8	0.041						598.8	0.018	598.8	0.018	598.8	0.019
599	0.015	599	0.017	599	0.041						599	0.018	599	0.018	599	0.018
599.2	0.015	599.2	0.017	599.2	0.041						599.2	0.018	599.2	0.018	599.2	0.018
599.4	0.015	599.4	0.017	599.4	0.041						599.4	0.018	599.4	0.018	599.4	0.018
599.6	0.015	599.6	0.017	599.6	0.04						599.6	0.018	599.6	0.018	599.6	0.018
599.8	0.015	599.8	0.017	599.8	0.04						599.8	0.018	599.8	0.018	599.8	0.018
600	0.015	600	0.017	600	0.04						600	0.018	600	0.018	600	0.018

## Sheet: pH
OLE													RLE
3 pH		5 pH		6 pH		8 pH		11 pH					3 pH		4 pH		6 pH		8 pH		11 pH
Wavelength nm.	Abs.	Wavelength nm.	Abs.	Wavelength nm.	Abs.	Wavelength nm.	Abs.	Wavelength nm.	Abs.				Wavelength nm.	Abs.	Wavelength nm.	Abs.	Wavelength nm.	Abs.	Wavelength nm.	Abs.	Wavelength nm.	Abs.
300	0.284	300	0.287	300	0.318	300	0.347	300	0.374				300	0.282	300	0.418	300	0.428	300	0.451	300	0.476
300.2	0.283	300.2	0.287	300.2	0.318	300.2	0.346	300.2	0.372				300.2	0.282	300.2	0.417	300.2	0.427	300.2	0.45	300.2	0.475
300.4	0.283	300.4	0.286	300.4	0.317	300.4	0.345	300.4	0.371				300.4	0.281	300.4	0.415	300.4	0.425	300.4	0.449	300.4	0.473
300.6	0.281	300.6	0.285	300.6	0.315	300.6	0.343	300.6	0.369				300.6	0.28	300.6	0.413	300.6	0.424	300.6	0.447	300.6	0.471
300.8	0.28	300.8	0.284	300.8	0.314	300.8	0.342	300.8	0.367				300.8	0.278	300.8	0.412	300.8	0.422	300.8	0.445	300.8	0.469
301	0.279	301	0.282	301	0.313	301	0.34	301	0.365				301	0.277	301	0.41	301	0.42	301	0.443	301	0.466
301.2	0.278	301.2	0.281	301.2	0.312	301.2	0.339	301.2	0.364				301.2	0.276	301.2	0.408	301.2	0.418	301.2	0.441	301.2	0.464
301.4	0.277	301.4	0.28	301.4	0.31	301.4	0.337	301.4	0.362				301.4	0.275	301.4	0.406	301.4	0.417	301.4	0.439	301.4	0.462
301.6	0.275	301.6	0.279	301.6	0.309	301.6	0.336	301.6	0.36				301.6	0.274	301.6	0.405	301.6	0.415	301.6	0.437	301.6	0.46
301.8	0.274	301.8	0.277	301.8	0.308	301.8	0.334	301.8	0.358				301.8	0.273	301.8	0.403	301.8	0.413	301.8	0.435	301.8	0.458
302	0.273	302	0.276	302	0.306	302	0.333	302	0.356				302	0.272	302	0.401	302	0.411	302	0.433	302	0.456
302.2	0.272	302.2	0.275	302.2	0.305	302.2	0.332	302.2	0.354				302.2	0.271	302.2	0.4	302.2	0.409	302.2	0.431	302.2	0.453
302.4	0.27	302.4	0.274	302.4	0.303	302.4	0.33	302.4	0.352				302.4	0.27	302.4	0.398	302.4	0.408	302.4	0.429	302.4	0.451
302.6	0.269	302.6	0.273	302.6	0.302	302.6	0.329	302.6	0.351				302.6	0.269	302.6	0.396	302.6	0.406	302.6	0.427	302.6	0.449
302.8	0.268	302.8	0.271	302.8	0.3	302.8	0.327	302.8	0.349				302.8	0.267	302.8	0.394	302.8	0.404	302.8	0.425	302.8	0.447
303	0.267	303	0.27	303	0.299	303	0.325	303	0.347				303	0.266	303	0.392	303	0.402	303	0.423	303	0.445
303.2	0.265	303.2	0.268	303.2	0.298	303.2	0.324	303.2	0.345				303.2	0.265	303.2	0.391	303.2	0.401	303.2	0.422	303.2	0.443
303.4	0.264	303.4	0.267	303.4	0.297	303.4	0.322	303.4	0.344				303.4	0.264	303.4	0.389	303.4	0.399	303.4	0.42	303.4	0.441
303.6	0.263	303.6	0.266	303.6	0.295	303.6	0.321	303.6	0.342				303.6	0.263	303.6	0.387	303.6	0.397	303.6	0.418	303.6	0.439
303.8	0.262	303.8	0.265	303.8	0.294	303.8	0.319	303.8	0.34				303.8	0.262	303.8	0.386	303.8	0.396	303.8	0.417	303.8	0.437
304	0.261	304	0.264	304	0.293	304	0.318	304	0.338				304	0.261	304	0.384	304	0.394	304	0.415	304	0.435
304.2	0.259	304.2	0.263	304.2	0.291	304.2	0.317	304.2	0.337				304.2	0.26	304.2	0.383	304.2	0.393	304.2	0.413	304.2	0.433
304.4	0.258	304.4	0.262	304.4	0.29	304.4	0.315	304.4	0.335				304.4	0.259	304.4	0.381	304.4	0.391	304.4	0.411	304.4	0.431
304.6	0.257	304.6	0.26	304.6	0.289	304.6	0.314	304.6	0.333				304.6	0.258	304.6	0.379	304.6	0.389	304.6	0.409	304.6	0.429
304.8	0.256	304.8	0.259	304.8	0.287	304.8	0.312	304.8	0.332				304.8	0.257	304.8	0.378	304.8	0.388	304.8	0.408	304.8	0.427
305	0.255	305	0.258	305	0.286	305	0.311	305	0.33				305	0.256	305	0.376	305	0.386	305	0.406	305	0.425
305.2	0.253	305.2	0.257	305.2	0.285	305.2	0.309	305.2	0.328				305.2	0.255	305.2	0.375	305.2	0.384	305.2	0.404	305.2	0.423
305.4	0.252	305.4	0.256	305.4	0.284	305.4	0.308	305.4	0.327				305.4	0.254	305.4	0.373	305.4	0.383	305.4	0.402	305.4	0.421
305.6	0.251	305.6	0.255	305.6	0.283	305.6	0.307	305.6	0.325				305.6	0.252	305.6	0.372	305.6	0.381	305.6	0.401	305.6	0.419
305.8	0.25	305.8	0.254	305.8	0.281	305.8	0.306	305.8	0.323				305.8	0.251	305.8	0.37	305.8	0.38	305.8	0.399	305.8	0.417
306	0.249	306	0.252	306	0.28	306	0.305	306	0.322				306	0.25	306	0.368	306	0.378	306	0.397	306	0.415
306.2	0.248	306.2	0.251	306.2	0.279	306.2	0.303	306.2	0.32				306.2	0.249	306.2	0.367	306.2	0.376	306.2	0.395	306.2	0.413
306.4	0.247	306.4	0.25	306.4	0.278	306.4	0.302	306.4	0.319				306.4	0.248	306.4	0.365	306.4	0.375	306.4	0.393	306.4	0.411
306.6	0.246	306.6	0.249	306.6	0.276	306.6	0.301	306.6	0.317				306.6	0.246	306.6	0.363	306.6	0.373	306.6	0.392	306.6	0.409
306.8	0.245	306.8	0.248	306.8	0.275	306.8	0.3	306.8	0.316				306.8	0.245	306.8	0.362	306.8	0.371	306.8	0.39	306.8	0.407
307	0.244	307	0.247	307	0.274	307	0.298	307	0.314				307	0.244	307	0.36	307	0.37	307	0.388	307	0.405
307.2	0.243	307.2	0.245	307.2	0.273	307.2	0.297	307.2	0.313				307.2	0.243	307.2	0.359	307.2	0.368	307.2	0.386	307.2	0.403
307.4	0.241	307.4	0.244	307.4	0.271	307.4	0.295	307.4	0.311				307.4	0.242	307.4	0.357	307.4	0.367	307.4	0.385	307.4	0.401
307.6	0.24	307.6	0.243	307.6	0.27	307.6	0.294	307.6	0.309				307.6	0.241	307.6	0.355	307.6	0.365	307.6	0.383	307.6	0.4
307.8	0.239	307.8	0.242	307.8	0.269	307.8	0.293	307.8	0.308				307.8	0.24	307.8	0.354	307.8	0.364	307.8	0.382	307.8	0.398
308	0.238	308	0.241	308	0.267	308	0.291	308	0.306				308	0.239	308	0.353	308	0.363	308	0.38	308	0.396
308.2	0.237	308.2	0.24	308.2	0.266	308.2	0.29	308.2	0.305				308.2	0.239	308.2	0.352	308.2	0.361	308.2	0.379	308.2	0.395
308.4	0.236	308.4	0.239	308.4	0.265	308.4	0.289	308.4	0.304				308.4	0.238	308.4	0.35	308.4	0.36	308.4	0.377	308.4	0.393
308.6	0.235	308.6	0.238	308.6	0.264	308.6	0.288	308.6	0.302				308.6	0.237	308.6	0.349	308.6	0.359	308.6	0.376	308.6	0.392
308.8	0.234	308.8	0.237	308.8	0.263	308.8	0.287	308.8	0.301				308.8	0.236	308.8	0.348	308.8	0.357	308.8	0.375	308.8	0.39
309	0.233	309	0.236	309	0.262	309	0.286	309	0.3				309	0.235	309	0.347	309	0.356	309	0.373	309	0.388
309.2	0.232	309.2	0.235	309.2	0.261	309.2	0.285	309.2	0.298				309.2	0.234	309.2	0.346	309.2	0.355	309.2	0.372	309.2	0.387
309.4	0.231	309.4	0.234	309.4	0.26	309.4	0.284	309.4	0.297				309.4	0.234	309.4	0.345	309.4	0.354	309.4	0.37	309.4	0.385
309.6	0.23	309.6	0.233	309.6	0.259	309.6	0.283	309.6	0.296				309.6	0.233	309.6	0.343	309.6	0.352	309.6	0.369	309.6	0.384
309.8	0.229	309.8	0.232	309.8	0.258	309.8	0.281	309.8	0.294				309.8	0.232	309.8	0.342	309.8	0.351	309.8	0.367	309.8	0.382
310	0.228	310	0.231	310	0.257	310	0.28	310	0.293				310	0.231	310	0.341	310	0.35	310	0.366	310	0.381
310.2	0.227	310.2	0.23	310.2	0.256	310.2	0.279	310.2	0.292				310.2	0.231	310.2	0.339	310.2	0.348	310.2	0.364	310.2	0.379
310.4	0.226	310.4	0.229	310.4	0.255	310.4	0.278	310.4	0.291				310.4	0.23	310.4	0.338	310.4	0.347	310.4	0.363	310.4	0.377
310.6	0.225	310.6	0.228	310.6	0.254	310.6	0.277	310.6	0.29				310.6	0.229	310.6	0.337	310.6	0.346	310.6	0.362	310.6	0.376
310.8	0.225	310.8	0.227	310.8	0.253	310.8	0.276	310.8	0.289				310.8	0.228	310.8	0.335	310.8	0.344	310.8	0.36	310.8	0.374
311	0.224	311	0.226	311	0.252	311	0.274	311	0.287				311	0.227	311	0.334	311	0.343	311	0.359	311	0.373
311.2	0.223	311.2	0.225	311.2	0.251	311.2	0.274	311.2	0.286				311.2	0.226	311.2	0.333	311.2	0.342	311.2	0.358	311.2	0.371
311.4	0.222	311.4	0.225	311.4	0.25	311.4	0.273	311.4	0.285				311.4	0.225	311.4	0.332	311.4	0.341	311.4	0.356	311.4	0.37
311.6	0.221	311.6	0.224	311.6	0.249	311.6	0.272	311.6	0.284				311.6	0.225	311.6	0.33	311.6	0.339	311.6	0.355	311.6	0.368
311.8	0.22	311.8	0.223	311.8	0.248	311.8	0.271	311.8	0.283				311.8	0.224	311.8	0.329	311.8	0.338	311.8	0.354	311.8	0.367
312	0.219	312	0.222	312	0.247	312	0.27	312	0.282				312	0.223	312	0.328	312	0.337	312	0.352	312	0.366
312.2	0.218	312.2	0.221	312.2	0.246	312.2	0.268	312.2	0.281				312.2	0.222	312.2	0.327	312.2	0.336	312.2	0.351	312.2	0.365
312.4	0.217	312.4	0.22	312.4	0.245	312.4	0.267	312.4	0.28				312.4	0.221	312.4	0.326	312.4	0.335	312.4	0.35	312.4	0.363
312.6	0.216	312.6	0.219	312.6	0.244	312.6	0.266	312.6	0.279				312.6	0.221	312.6	0.325	312.6	0.334	312.6	0.349	312.6	0.362
312.8	0.215	312.8	0.218	312.8	0.243	312.8	0.265	312.8	0.278				312.8	0.22	312.8	0.324	312.8	0.333	312.8	0.348	312.8	0.361
313	0.215	313	0.217	313	0.242	313	0.264	313	0.277				313	0.22	313	0.323	313	0.332	313	0.347	313	0.36
313.2	0.214	313.2	0.217	313.2	0.241	313.2	0.263	313.2	0.276				313.2	0.219	313.2	0.323	313.2	0.331	313.2	0.345	313.2	0.359
313.4	0.213	313.4	0.216	313.4	0.24	313.4	0.262	313.4	0.275				313.4	0.219	313.4	0.322	313.4	0.33	313.4	0.345	313.4	0.358
313.6	0.212	313.6	0.215	313.6	0.239	313.6	0.261	313.6	0.274				313.6	0.218	313.6	0.321	313.6	0.329	313.6	0.344	313.6	0.357
313.8	0.211	313.8	0.214	313.8	0.238	313.8	0.261	313.8	0.273				313.8	0.218	313.8	0.32	313.8	0.329	313.8	0.343	313.8	0.356
314	0.21	314	0.213	314	0.237	314	0.26	314	0.272				314	0.217	314	0.319	314	0.328	314	0.342	314	0.355
314.2	0.21	314.2	0.213	314.2	0.237	314.2	0.259	314.2	0.271				314.2	0.217	314.2	0.318	314.2	0.327	314.2	0.34	314.2	0.354
314.4	0.209	314.4	0.212	314.4	0.236	314.4	0.259	314.4	0.271				314.4	0.216	314.4	0.317	314.4	0.326	314.4	0.339	314.4	0.353
314.6	0.209	314.6	0.212	314.6	0.236	314.6	0.258	314.6	0.27				314.6	0.215	314.6	0.316	314.6	0.325	314.6	0.338	314.6	0.352
314.8	0.209	314.8	0.211	314.8	0.235	314.8	0.257	314.8	0.27				314.8	0.214	314.8	0.316	314.8	0.324	314.8	0.337	314.8	0.351
315	0.208	315	0.211	315	0.234	315	0.256	315	0.269				315	0.214	315	0.315	315	0.324	315	0.336	315	0.35
315.2	0.207	315.2	0.21	315.2	0.234	315.2	0.256	315.2	0.268				315.2	0.213	315.2	0.314	315.2	0.323	315.2	0.335	315.2	0.349
315.4	0.207	315.4	0.209	315.4	0.233	315.4	0.255	315.4	0.268				315.4	0.213	315.4	0.313	315.4	0.321	315.4	0.334	315.4	0.347
315.6	0.206	315.6	0.209	315.6	0.233	315.6	0.254	315.6	0.267				315.6	0.212	315.6	0.312	315.6	0.321	315.6	0.333	315.6	0.347
315.8	0.205	315.8	0.208	315.8	0.232	315.8	0.254	315.8	0.266				315.8	0.211	315.8	0.311	315.8	0.32	315.8	0.332	315.8	0.346
316	0.205	316	0.207	316	0.231	316	0.253	316	0.265				316	0.211	316	0.311	316	0.319	316	0.332	316	0.345
316.2	0.204	316.2	0.207	316.2	0.23	316.2	0.252	316.2	0.265				316.2	0.21	316.2	0.31	316.2	0.318	316.2	0.331	316.2	0.344
316.4	0.204	316.4	0.206	316.4	0.23	316.4	0.252	316.4	0.264				316.4	0.21	316.4	0.309	316.4	0.317	316.4	0.33	316.4	0.343
316.6	0.203	316.6	0.206	316.6	0.229	316.6	0.251	316.6	0.264				316.6	0.209	316.6	0.308	316.6	0.317	316.6	0.329	316.6	0.342
316.8	0.202	316.8	0.205	316.8	0.228	316.8	0.25	316.8	0.263				316.8	0.209	316.8	0.308	316.8	0.316	316.8	0.328	316.8	0.341
317	0.202	317	0.204	317	0.228	317	0.249	317	0.263				317	0.208	317	0.307	317	0.315	317	0.327	317	0.341
317.2	0.201	317.2	0.204	317.2	0.227	317.2	0.249	317.2	0.262				317.2	0.208	317.2	0.306	317.2	0.314	317.2	0.326	317.2	0.34
317.4	0.201	317.4	0.203	317.4	0.227	317.4	0.248	317.4	0.262				317.4	0.208	317.4	0.306	317.4	0.314	317.4	0.325	317.4	0.339
317.6	0.2	317.6	0.203	317.6	0.226	317.6	0.248	317.6	0.261				317.6	0.207	317.6	0.305	317.6	0.313	317.6	0.325	317.6	0.338
317.8	0.2	317.8	0.202	317.8	0.226	317.8	0.247	317.8	0.261				317.8	0.206	317.8	0.304	317.8	0.312	317.8	0.324	317.8	0.338
318	0.199	318	0.202	318	0.225	318	0.247	318	0.26				318	0.206	318	0.303	318	0.312	318	0.323	318	0.337
318.2	0.199	318.2	0.201	318.2	0.225	318.2	0.246	318.2	0.26				318.2	0.205	318.2	0.303	318.2	0.311	318.2	0.322	318.2	0.336
318.4	0.199	318.4	0.201	318.4	0.224	318.4	0.245	318.4	0.26				318.4	0.205	318.4	0.302	318.4	0.31	318.4	0.321	318.4	0.335
318.6	0.198	318.6	0.2	318.6	0.223	318.6	0.245	318.6	0.259				318.6	0.205	318.6	0.302	318.6	0.309	318.6	0.321	318.6	0.335
318.8	0.198	318.8	0.2	318.8	0.223	318.8	0.245	318.8	0.259				318.8	0.204	318.8	0.301	318.8	0.309	318.8	0.32	318.8	0.334
319	0.197	319	0.199	319	0.222	319	0.244	319	0.258				319	0.204	319	0.3	319	0.308	319	0.32	319	0.333
319.2	0.197	319.2	0.199	319.2	0.222	319.2	0.243	319.2	0.258				319.2	0.203	319.2	0.3	319.2	0.308	319.2	0.319	319.2	0.333
319.4	0.196	319.4	0.198	319.4	0.221	319.4	0.243	319.4	0.257				319.4	0.203	319.4	0.3	319.4	0.307	319.4	0.318	319.4	0.333
319.6	0.195	319.6	0.197	319.6	0.22	319.6	0.242	319.6	0.257				319.6	0.203	319.6	0.299	319.6	0.307	319.6	0.318	319.6	0.332
319.8	0.195	319.8	0.197	319.8	0.22	319.8	0.242	319.8	0.257				319.8	0.203	319.8	0.299	319.8	0.306	319.8	0.317	319.8	0.331
320	0.195	320	0.197	320	0.22	320	0.241	320	0.257				320	0.202	320	0.299	320	0.306	320	0.317	320	0.331
320.2	0.194	320.2	0.196	320.2	0.219	320.2	0.241	320.2	0.256				320.2	0.202	320.2	0.298	320.2	0.305	320.2	0.316	320.2	0.33
320.4	0.194	320.4	0.196	320.4	0.219	320.4	0.241	320.4	0.256				320.4	0.202	320.4	0.298	320.4	0.305	320.4	0.316	320.4	0.33
320.6	0.194	320.6	0.196	320.6	0.219	320.6	0.24	320.6	0.256				320.6	0.201	320.6	0.297	320.6	0.304	320.6	0.315	320.6	0.33
320.8	0.193	320.8	0.196	320.8	0.219	320.8	0.24	320.8	0.256				320.8	0.201	320.8	0.297	320.8	0.304	320.8	0.314	320.8	0.329
321	0.193	321	0.195	321	0.218	321	0.24	321	0.256				321	0.201	321	0.296	321	0.304	321	0.314	321	0.329
321.2	0.193	321.2	0.195	321.2	0.218	321.2	0.239	321.2	0.256				321.2	0.2	321.2	0.295	321.2	0.303	321.2	0.313	321.2	0.329
321.4	0.193	321.4	0.195	321.4	0.218	321.4	0.239	321.4	0.256				321.4	0.2	321.4	0.295	321.4	0.302	321.4	0.313	321.4	0.328
321.6	0.192	321.6	0.194	321.6	0.217	321.6	0.239	321.6	0.256				321.6	0.2	321.6	0.294	321.6	0.302	321.6	0.312	321.6	0.328
321.8	0.192	321.8	0.194	321.8	0.217	321.8	0.239	321.8	0.256				321.8	0.199	321.8	0.294	321.8	0.302	321.8	0.312	321.8	0.328
322	0.192	322	0.194	322	0.217	322	0.239	322	0.256				322	0.199	322	0.294	322	0.301	322	0.312	322	0.328
322.2	0.191	322.2	0.193	322.2	0.216	322.2	0.238	322.2	0.255				322.2	0.199	322.2	0.293	322.2	0.301	322.2	0.311	322.2	0.327
322.4	0.191	322.4	0.193	322.4	0.216	322.4	0.238	322.4	0.256				322.4	0.199	322.4	0.293	322.4	0.301	322.4	0.311	322.4	0.327
322.6	0.191	322.6	0.192	322.6	0.216	322.6	0.237	322.6	0.255				322.6	0.198	322.6	0.293	322.6	0.301	322.6	0.311	322.6	0.327
322.8	0.191	322.8	0.192	322.8	0.215	322.8	0.237	322.8	0.255				322.8	0.198	322.8	0.292	322.8	0.3	322.8	0.31	322.8	0.326
323	0.19	323	0.192	323	0.215	323	0.237	323	0.255				323	0.198	323	0.292	323	0.3	323	0.31	323	0.326
323.2	0.19	323.2	0.192	323.2	0.215	323.2	0.237	323.2	0.255				323.2	0.198	323.2	0.292	323.2	0.299	323.2	0.31	323.2	0.326
323.4	0.19	323.4	0.192	323.4	0.214	323.4	0.236	323.4	0.255				323.4	0.198	323.4	0.291	323.4	0.299	323.4	0.309	323.4	0.326
323.6	0.189	323.6	0.191	323.6	0.214	323.6	0.236	323.6	0.255				323.6	0.198	323.6	0.291	323.6	0.299	323.6	0.309	323.6	0.326
323.8	0.189	323.8	0.191	323.8	0.214	323.8	0.236	323.8	0.256				323.8	0.197	323.8	0.291	323.8	0.299	323.8	0.308	323.8	0.326
324	0.189	324	0.191	324	0.214	324	0.236	324	0.256				324	0.197	324	0.29	324	0.298	324	0.308	324	0.326
324.2	0.189	324.2	0.19	324.2	0.213	324.2	0.235	324.2	0.256				324.2	0.197	324.2	0.29	324.2	0.298	324.2	0.308	324.2	0.326
324.4	0.188	324.4	0.19	324.4	0.213	324.4	0.235	324.4	0.256				324.4	0.197	324.4	0.29	324.4	0.298	324.4	0.307	324.4	0.325
324.6	0.188	324.6	0.19	324.6	0.213	324.6	0.235	324.6	0.256				324.6	0.197	324.6	0.29	324.6	0.297	324.6	0.307	324.6	0.325
324.8	0.188	324.8	0.19	324.8	0.213	324.8	0.235	324.8	0.256				324.8	0.197	324.8	0.29	324.8	0.297	324.8	0.307	324.8	0.325
325	0.188	325	0.19	325	0.213	325	0.235	325	0.256				325	0.196	325	0.289	325	0.297	325	0.307	325	0.325
325.2	0.188	325.2	0.19	325.2	0.213	325.2	0.235	325.2	0.257				325.2	0.196	325.2	0.289	325.2	0.297	325.2	0.307	325.2	0.325
325.4	0.188	325.4	0.19	325.4	0.213	325.4	0.235	325.4	0.257				325.4	0.196	325.4	0.289	325.4	0.297	325.4	0.307	325.4	0.325
325.6	0.188	325.6	0.19	325.6	0.213	325.6	0.235	325.6	0.258				325.6	0.196	325.6	0.289	325.6	0.296	325.6	0.306	325.6	0.325
325.8	0.188	325.8	0.19	325.8	0.213	325.8	0.235	325.8	0.258				325.8	0.196	325.8	0.289	325.8	0.296	325.8	0.306	325.8	0.325
326	0.188	326	0.19	326	0.213	326	0.235	326	0.259				326	0.196	326	0.288	326	0.296	326	0.306	326	0.325
326.2	0.188	326.2	0.19	326.2	0.213	326.2	0.235	326.2	0.259				326.2	0.195	326.2	0.288	326.2	0.296	326.2	0.306	326.2	0.325
326.4	0.188	326.4	0.19	326.4	0.213	326.4	0.236	326.4	0.26				326.4	0.195	326.4	0.288	326.4	0.296	326.4	0.306	326.4	0.325
326.6	0.188	326.6	0.19	326.6	0.213	326.6	0.236	326.6	0.26				326.6	0.195	326.6	0.288	326.6	0.296	326.6	0.306	326.6	0.325
326.8	0.188	326.8	0.19	326.8	0.213	326.8	0.236	326.8	0.26				326.8	0.195	326.8	0.288	326.8	0.296	326.8	0.306	326.8	0.326
327	0.188	327	0.19	327	0.213	327	0.236	327	0.26				327	0.195	327	0.288	327	0.296	327	0.306	327	0.326
327.2	0.188	327.2	0.19	327.2	0.213	327.2	0.236	327.2	0.261				327.2	0.195	327.2	0.288	327.2	0.296	327.2	0.306	327.2	0.326
327.4	0.188	327.4	0.19	327.4	0.213	327.4	0.236	327.4	0.261				327.4	0.195	327.4	0.288	327.4	0.296	327.4	0.306	327.4	0.326
327.6	0.188	327.6	0.19	327.6	0.213	327.6	0.236	327.6	0.262				327.6	0.195	327.6	0.288	327.6	0.296	327.6	0.306	327.6	0.327
327.8	0.189	327.8	0.19	327.8	0.213	327.8	0.236	327.8	0.263				327.8	0.195	327.8	0.288	327.8	0.296	327.8	0.306	327.8	0.327
328	0.189	328	0.19	328	0.213	328	0.237	328	0.263				328	0.195	328	0.288	328	0.296	328	0.306	328	0.327
328.2	0.189	328.2	0.191	328.2	0.214	328.2	0.237	328.2	0.264				328.2	0.195	328.2	0.288	328.2	0.296	328.2	0.306	328.2	0.328
328.4	0.189	328.4	0.191	328.4	0.214	328.4	0.237	328.4	0.265				328.4	0.195	328.4	0.288	328.4	0.296	328.4	0.306	328.4	0.328
328.6	0.189	328.6	0.191	328.6	0.214	328.6	0.238	328.6	0.265				328.6	0.195	328.6	0.288	328.6	0.296	328.6	0.307	328.6	0.328
328.8	0.189	328.8	0.191	328.8	0.215	328.8	0.238	328.8	0.266				328.8	0.195	328.8	0.288	328.8	0.296	328.8	0.307	328.8	0.328
329	0.19	329	0.192	329	0.215	329	0.239	329	0.267				329	0.195	329	0.288	329	0.296	329	0.307	329	0.329
329.2	0.19	329.2	0.192	329.2	0.215	329.2	0.239	329.2	0.267				329.2	0.195	329.2	0.288	329.2	0.297	329.2	0.307	329.2	0.329
329.4	0.19	329.4	0.192	329.4	0.216	329.4	0.24	329.4	0.268				329.4	0.195	329.4	0.289	329.4	0.297	329.4	0.307	329.4	0.329
329.6	0.191	329.6	0.192	329.6	0.216	329.6	0.24	329.6	0.269				329.6	0.196	329.6	0.289	329.6	0.297	329.6	0.307	329.6	0.33
329.8	0.191	329.8	0.193	329.8	0.216	329.8	0.241	329.8	0.27				329.8	0.196	329.8	0.289	329.8	0.297	329.8	0.308	329.8	0.33
330	0.192	330	0.193	330	0.217	330	0.241	330	0.271				330	0.196	330	0.289	330	0.297	330	0.308	330	0.331
330.2	0.192	330.2	0.194	330.2	0.217	330.2	0.242	330.2	0.272				330.2	0.196	330.2	0.289	330.2	0.298	330.2	0.308	330.2	0.331
330.4	0.192	330.4	0.194	330.4	0.218	330.4	0.242	330.4	0.273				330.4	0.196	330.4	0.289	330.4	0.298	330.4	0.309	330.4	0.332
330.6	0.193	330.6	0.195	330.6	0.218	330.6	0.243	330.6	0.274				330.6	0.196	330.6	0.29	330.6	0.298	330.6	0.309	330.6	0.333
330.8	0.193	330.8	0.196	330.8	0.219	330.8	0.244	330.8	0.275				330.8	0.197	330.8	0.29	330.8	0.299	330.8	0.309	330.8	0.333
331	0.194	331	0.196	331	0.22	331	0.245	331	0.276				331	0.197	331	0.29	331	0.299	331	0.31	331	0.334
331.2	0.194	331.2	0.196	331.2	0.22	331.2	0.245	331.2	0.277				331.2	0.197	331.2	0.291	331.2	0.3	331.2	0.31	331.2	0.335
331.4	0.195	331.4	0.197	331.4	0.221	331.4	0.246	331.4	0.279				331.4	0.197	331.4	0.291	331.4	0.3	331.4	0.311	331.4	0.335
331.6	0.195	331.6	0.197	331.6	0.221	331.6	0.247	331.6	0.28				331.6	0.198	331.6	0.291	331.6	0.301	331.6	0.312	331.6	0.336
331.8	0.196	331.8	0.198	331.8	0.222	331.8	0.247	331.8	0.281				331.8	0.198	331.8	0.292	331.8	0.301	331.8	0.312	331.8	0.337
332	0.196	332	0.198	332	0.223	332	0.248	332	0.282				332	0.199	332	0.292	332	0.301	332	0.313	332	0.338
332.2	0.197	332.2	0.199	332.2	0.223	332.2	0.249	332.2	0.283				332.2	0.199	332.2	0.293	332.2	0.302	332.2	0.313	332.2	0.339
332.4	0.197	332.4	0.2	332.4	0.224	332.4	0.25	332.4	0.284				332.4	0.199	332.4	0.293	332.4	0.302	332.4	0.314	332.4	0.339
332.6	0.198	332.6	0.2	332.6	0.225	332.6	0.251	332.6	0.285				332.6	0.199	332.6	0.294	332.6	0.303	332.6	0.314	332.6	0.34
332.8	0.199	332.8	0.201	332.8	0.226	332.8	0.252	332.8	0.287				332.8	0.199	332.8	0.294	332.8	0.303	332.8	0.315	332.8	0.341
333	0.199	333	0.201	333	0.226	333	0.253	333	0.288				333	0.2	333	0.295	333	0.304	333	0.316	333	0.342
333.2	0.2	333.2	0.202	333.2	0.227	333.2	0.254	333.2	0.289				333.2	0.2	333.2	0.295	333.2	0.304	333.2	0.316	333.2	0.343
333.4	0.201	333.4	0.203	333.4	0.228	333.4	0.255	333.4	0.291				333.4	0.2	333.4	0.296	333.4	0.305	333.4	0.317	333.4	0.344
333.6	0.201	333.6	0.204	333.6	0.229	333.6	0.256	333.6	0.293				333.6	0.201	333.6	0.296	333.6	0.306	333.6	0.318	333.6	0.345
333.8	0.202	333.8	0.205	333.8	0.23	333.8	0.257	333.8	0.294				333.8	0.201	333.8	0.297	333.8	0.306	333.8	0.319	333.8	0.346
334	0.203	334	0.206	334	0.231	334	0.258	334	0.296				334	0.202	334	0.298	334	0.307	334	0.32	334	0.348
334.2	0.204	334.2	0.207	334.2	0.232	334.2	0.259	334.2	0.298				334.2	0.202	334.2	0.298	334.2	0.308	334.2	0.321	334.2	0.349
334.4	0.205	334.4	0.208	334.4	0.234	334.4	0.261	334.4	0.299				334.4	0.203	334.4	0.299	334.4	0.309	334.4	0.321	334.4	0.35
334.6	0.206	334.6	0.209	334.6	0.234	334.6	0.262	334.6	0.3				334.6	0.203	334.6	0.3	334.6	0.309	334.6	0.322	334.6	0.351
334.8	0.207	334.8	0.21	334.8	0.235	334.8	0.263	334.8	0.302				334.8	0.204	334.8	0.3	334.8	0.31	334.8	0.323	334.8	0.352
335	0.208	335	0.211	335	0.237	335	0.265	335	0.304				335	0.204	335	0.301	335	0.311	335	0.324	335	0.354
335.2	0.209	335.2	0.212	335.2	0.238	335.2	0.266	335.2	0.306				335.2	0.205	335.2	0.302	335.2	0.312	335.2	0.325	335.2	0.355
335.4	0.21	335.4	0.213	335.4	0.239	335.4	0.267	335.4	0.307				335.4	0.205	335.4	0.303	335.4	0.313	335.4	0.326	335.4	0.357
335.6	0.211	335.6	0.214	335.6	0.24	335.6	0.268	335.6	0.309				335.6	0.206	335.6	0.303	335.6	0.314	335.6	0.327	335.6	0.358
335.8	0.212	335.8	0.215	335.8	0.241	335.8	0.27	335.8	0.311				335.8	0.206	335.8	0.304	335.8	0.315	335.8	0.328	335.8	0.359
336	0.213	336	0.216	336	0.242	336	0.271	336	0.313				336	0.207	336	0.305	336	0.316	336	0.329	336	0.36
336.2	0.214	336.2	0.217	336.2	0.244	336.2	0.272	336.2	0.315				336.2	0.208	336.2	0.306	336.2	0.317	336.2	0.33	336.2	0.362
336.4	0.215	336.4	0.218	336.4	0.245	336.4	0.274	336.4	0.316				336.4	0.208	336.4	0.307	336.4	0.318	336.4	0.331	336.4	0.363
336.6	0.216	336.6	0.219	336.6	0.246	336.6	0.275	336.6	0.318				336.6	0.209	336.6	0.308	336.6	0.318	336.6	0.332	336.6	0.365
336.8	0.218	336.8	0.221	336.8	0.248	336.8	0.277	336.8	0.32				336.8	0.209	336.8	0.309	336.8	0.319	336.8	0.334	336.8	0.367
337	0.219	337	0.222	337	0.249	337	0.278	337	0.322				337	0.21	337	0.309	337	0.32	337	0.335	337	0.368
337.2	0.22	337.2	0.223	337.2	0.25	337.2	0.28	337.2	0.324				337.2	0.211	337.2	0.31	337.2	0.322	337.2	0.336	337.2	0.37
337.4	0.222	337.4	0.225	337.4	0.252	337.4	0.282	337.4	0.327				337.4	0.211	337.4	0.311	337.4	0.323	337.4	0.338	337.4	0.371
337.6	0.223	337.6	0.226	337.6	0.253	337.6	0.283	337.6	0.328				337.6	0.212	337.6	0.312	337.6	0.324	337.6	0.339	337.6	0.373
337.8	0.224	337.8	0.227	337.8	0.255	337.8	0.285	337.8	0.33				337.8	0.213	337.8	0.314	337.8	0.326	337.8	0.341	337.8	0.374
338	0.225	338	0.228	338	0.256	338	0.286	338	0.333				338	0.213	338	0.315	338	0.327	338	0.342	338	0.376
338.2	0.227	338.2	0.23	338.2	0.257	338.2	0.288	338.2	0.334				338.2	0.214	338.2	0.316	338.2	0.328	338.2	0.343	338.2	0.378
338.4	0.228	338.4	0.231	338.4	0.259	338.4	0.29	338.4	0.337				338.4	0.215	338.4	0.317	338.4	0.329	338.4	0.345	338.4	0.38
338.6	0.229	338.6	0.232	338.6	0.26	338.6	0.291	338.6	0.339				338.6	0.216	338.6	0.318	338.6	0.331	338.6	0.347	338.6	0.382
338.8	0.231	338.8	0.233	338.8	0.262	338.8	0.293	338.8	0.341				338.8	0.216	338.8	0.319	338.8	0.332	338.8	0.348	338.8	0.384
339	0.232	339	0.235	339	0.263	339	0.295	339	0.343				339	0.217	339	0.321	339	0.333	339	0.35	339	0.386
339.2	0.233	339.2	0.236	339.2	0.265	339.2	0.296	339.2	0.345				339.2	0.218	339.2	0.322	339.2	0.334	339.2	0.351	339.2	0.388
339.4	0.234	339.4	0.238	339.4	0.266	339.4	0.298	339.4	0.347				339.4	0.219	339.4	0.323	339.4	0.336	339.4	0.353	339.4	0.39
339.6	0.235	339.6	0.239	339.6	0.268	339.6	0.3	339.6	0.349				339.6	0.22	339.6	0.324	339.6	0.337	339.6	0.354	339.6	0.392
339.8	0.236	339.8	0.241	339.8	0.27	339.8	0.301	339.8	0.351				339.8	0.221	339.8	0.325	339.8	0.338	339.8	0.356	339.8	0.394
340	0.238	340	0.242	340	0.271	340	0.303	340	0.353				340	0.222	340	0.327	340	0.34	340	0.357	340	0.396
340.2	0.239	340.2	0.243	340.2	0.272	340.2	0.304	340.2	0.355				340.2	0.222	340.2	0.328	340.2	0.341	340.2	0.359	340.2	0.398
340.4	0.241	340.4	0.244	340.4	0.273	340.4	0.306	340.4	0.357				340.4	0.223	340.4	0.329	340.4	0.343	340.4	0.36	340.4	0.399
340.6	0.242	340.6	0.246	340.6	0.275	340.6	0.308	340.6	0.359				340.6	0.224	340.6	0.331	340.6	0.344	340.6	0.362	340.6	0.401
340.8	0.243	340.8	0.247	340.8	0.276	340.8	0.309	340.8	0.361				340.8	0.225	340.8	0.332	340.8	0.346	340.8	0.364	340.8	0.404
341	0.245	341	0.248	341	0.278	341	0.311	341	0.363				341	0.226	341	0.333	341	0.347	341	0.365	341	0.406
341.2	0.246	341.2	0.249	341.2	0.28	341.2	0.313	341.2	0.365				341.2	0.227	341.2	0.335	341.2	0.349	341.2	0.367	341.2	0.408
341.4	0.247	341.4	0.251	341.4	0.281	341.4	0.314	341.4	0.367				341.4	0.228	341.4	0.336	341.4	0.35	341.4	0.369	341.4	0.41
341.6	0.248	341.6	0.252	341.6	0.283	341.6	0.316	341.6	0.37				341.6	0.229	341.6	0.338	341.6	0.351	341.6	0.371	341.6	0.412
341.8	0.25	341.8	0.254	341.8	0.284	341.8	0.318	341.8	0.372				341.8	0.23	341.8	0.339	341.8	0.353	341.8	0.373	341.8	0.414
342	0.251	342	0.255	342	0.286	342	0.32	342	0.374				342	0.231	342	0.341	342	0.354	342	0.374	342	0.416
342.2	0.253	342.2	0.256	342.2	0.287	342.2	0.321	342.2	0.376				342.2	0.232	342.2	0.342	342.2	0.356	342.2	0.376	342.2	0.419
342.4	0.254	342.4	0.258	342.4	0.289	342.4	0.323	342.4	0.378				342.4	0.233	342.4	0.344	342.4	0.358	342.4	0.378	342.4	0.421
342.6	0.255	342.6	0.26	342.6	0.291	342.6	0.325	342.6	0.38				342.6	0.234	342.6	0.346	342.6	0.359	342.6	0.38	342.6	0.423
342.8	0.257	342.8	0.261	342.8	0.292	342.8	0.327	342.8	0.382				342.8	0.235	342.8	0.347	342.8	0.361	342.8	0.382	342.8	0.425
343	0.258	343	0.262	343	0.294	343	0.329	343	0.385				343	0.236	343	0.349	343	0.363	343	0.383	343	0.427
343.2	0.26	343.2	0.263	343.2	0.295	343.2	0.33	343.2	0.386				343.2	0.237	343.2	0.35	343.2	0.364	343.2	0.385	343.2	0.43
343.4	0.261	343.4	0.265	343.4	0.297	343.4	0.332	343.4	0.389				343.4	0.237	343.4	0.351	343.4	0.366	343.4	0.387	343.4	0.432
343.6	0.263	343.6	0.266	343.6	0.298	343.6	0.334	343.6	0.391				343.6	0.238	343.6	0.353	343.6	0.368	343.6	0.388	343.6	0.434
343.8	0.264	343.8	0.268	343.8	0.3	343.8	0.335	343.8	0.393				343.8	0.239	343.8	0.354	343.8	0.369	343.8	0.391	343.8	0.436
344	0.265	344	0.269	344	0.301	344	0.337	344	0.396				344	0.24	344	0.356	344	0.37	344	0.392	344	0.438
344.2	0.266	344.2	0.27	344.2	0.303	344.2	0.339	344.2	0.398				344.2	0.241	344.2	0.357	344.2	0.372	344.2	0.394	344.2	0.44
344.4	0.268	344.4	0.272	344.4	0.305	344.4	0.341	344.4	0.4				344.4	0.242	344.4	0.358	344.4	0.373	344.4	0.396	344.4	0.442
344.6	0.269	344.6	0.273	344.6	0.306	344.6	0.343	344.6	0.402				344.6	0.243	344.6	0.359	344.6	0.375	344.6	0.398	344.6	0.445
344.8	0.271	344.8	0.275	344.8	0.308	344.8	0.344	344.8	0.404				344.8	0.244	344.8	0.361	344.8	0.377	344.8	0.399	344.8	0.447
345	0.272	345	0.276	345	0.31	345	0.346	345	0.406				345	0.245	345	0.363	345	0.378	345	0.401	345	0.449
345.2	0.273	345.2	0.277	345.2	0.311	345.2	0.348	345.2	0.409				345.2	0.246	345.2	0.364	345.2	0.38	345.2	0.403	345.2	0.451
345.4	0.275	345.4	0.279	345.4	0.313	345.4	0.35	345.4	0.411				345.4	0.247	345.4	0.366	345.4	0.382	345.4	0.405	345.4	0.453
345.6	0.276	345.6	0.28	345.6	0.314	345.6	0.351	345.6	0.413				345.6	0.248	345.6	0.367	345.6	0.383	345.6	0.406	345.6	0.455
345.8	0.278	345.8	0.282	345.8	0.316	345.8	0.353	345.8	0.415				345.8	0.249	345.8	0.369	345.8	0.385	345.8	0.408	345.8	0.457
346	0.279	346	0.284	346	0.317	346	0.355	346	0.417				346	0.25	346	0.37	346	0.386	346	0.41	346	0.459
346.2	0.28	346.2	0.285	346.2	0.319	346.2	0.357	346.2	0.419				346.2	0.251	346.2	0.372	346.2	0.388	346.2	0.412	346.2	0.461
346.4	0.282	346.4	0.286	346.4	0.321	346.4	0.358	346.4	0.421				346.4	0.252	346.4	0.374	346.4	0.39	346.4	0.414	346.4	0.464
346.6	0.283	346.6	0.288	346.6	0.322	346.6	0.36	346.6	0.423				346.6	0.253	346.6	0.375	346.6	0.391	346.6	0.416	346.6	0.466
346.8	0.285	346.8	0.289	346.8	0.324	346.8	0.362	346.8	0.426				346.8	0.254	346.8	0.377	346.8	0.393	346.8	0.418	346.8	0.468
347	0.287	347	0.291	347	0.326	347	0.364	347	0.428				347	0.255	347	0.378	347	0.395	347	0.42	347	0.471
347.2	0.288	347.2	0.293	347.2	0.327	347.2	0.366	347.2	0.43				347.2	0.256	347.2	0.38	347.2	0.396	347.2	0.422	347.2	0.473
347.4	0.29	347.4	0.294	347.4	0.329	347.4	0.368	347.4	0.433				347.4	0.258	347.4	0.382	347.4	0.398	347.4	0.424	347.4	0.475
347.6	0.292	347.6	0.296	347.6	0.331	347.6	0.37	347.6	0.435				347.6	0.259	347.6	0.384	347.6	0.4	347.6	0.426	347.6	0.478
347.8	0.293	347.8	0.297	347.8	0.333	347.8	0.372	347.8	0.438				347.8	0.26	347.8	0.385	347.8	0.401	347.8	0.428	347.8	0.48
348	0.294	348	0.299	348	0.334	348	0.374	348	0.44				348	0.262	348	0.387	348	0.403	348	0.43	348	0.482
348.2	0.296	348.2	0.3	348.2	0.336	348.2	0.376	348.2	0.442				348.2	0.263	348.2	0.388	348.2	0.405	348.2	0.432	348.2	0.485
348.4	0.297	348.4	0.302	348.4	0.337	348.4	0.378	348.4	0.444				348.4	0.264	348.4	0.39	348.4	0.407	348.4	0.434	348.4	0.487
348.6	0.299	348.6	0.303	348.6	0.339	348.6	0.38	348.6	0.447				348.6	0.265	348.6	0.392	348.6	0.409	348.6	0.436	348.6	0.489
348.8	0.3	348.8	0.305	348.8	0.341	348.8	0.382	348.8	0.449				348.8	0.266	348.8	0.393	348.8	0.41	348.8	0.438	348.8	0.492
349	0.302	349	0.306	349	0.342	349	0.383	349	0.451				349	0.267	349	0.395	349	0.412	349	0.439	349	0.494
349.2	0.303	349.2	0.307	349.2	0.344	349.2	0.385	349.2	0.453				349.2	0.268	349.2	0.396	349.2	0.414	349.2	0.441	349.2	0.496
349.4	0.304	349.4	0.309	349.4	0.346	349.4	0.387	349.4	0.455				349.4	0.269	349.4	0.398	349.4	0.415	349.4	0.443	349.4	0.498
349.6	0.306	349.6	0.31	349.6	0.348	349.6	0.389	349.6	0.458				349.6	0.27	349.6	0.4	349.6	0.417	349.6	0.445	349.6	0.5
349.8	0.307	349.8	0.312	349.8	0.349	349.8	0.391	349.8	0.46				349.8	0.271	349.8	0.401	349.8	0.418	349.8	0.447	349.8	0.503
350	0.309	350	0.313	350	0.351	350	0.393	350	0.462				350	0.272	350	0.403	350	0.42	350	0.449	350	0.505
350.2	0.31	350.2	0.315	350.2	0.353	350.2	0.394	350.2	0.464				350.2	0.273	350.2	0.404	350.2	0.422	350.2	0.45	350.2	0.507
350.4	0.311	350.4	0.316	350.4	0.354	350.4	0.397	350.4	0.466				350.4	0.273	350.4	0.406	350.4	0.423	350.4	0.453	350.4	0.509
350.6	0.313	350.6	0.317	350.6	0.356	350.6	0.398	350.6	0.468				350.6	0.275	350.6	0.407	350.6	0.425	350.6	0.454	350.6	0.511
350.8	0.314	350.8	0.319	350.8	0.357	350.8	0.4	350.8	0.47				350.8	0.276	350.8	0.409	350.8	0.426	350.8	0.456	350.8	0.513
351	0.316	351	0.32	351	0.359	351	0.402	351	0.473				351	0.277	351	0.411	351	0.428	351	0.459	351	0.515
351.2	0.318	351.2	0.322	351.2	0.361	351.2	0.404	351.2	0.475				351.2	0.278	351.2	0.412	351.2	0.43	351.2	0.46	351.2	0.518
351.4	0.319	351.4	0.324	351.4	0.363	351.4	0.406	351.4	0.477				351.4	0.279	351.4	0.414	351.4	0.432	351.4	0.463	351.4	0.52
351.6	0.321	351.6	0.326	351.6	0.364	351.6	0.408	351.6	0.48				351.6	0.28	351.6	0.415	351.6	0.434	351.6	0.464	351.6	0.523
351.8	0.323	351.8	0.327	351.8	0.366	351.8	0.41	351.8	0.482				351.8	0.281	351.8	0.417	351.8	0.435	351.8	0.466	351.8	0.525
352	0.324	352	0.329	352	0.368	352	0.412	352	0.484				352	0.282	352	0.419	352	0.437	352	0.468	352	0.528
352.2	0.326	352.2	0.33	352.2	0.37	352.2	0.414	352.2	0.487				352.2	0.283	352.2	0.42	352.2	0.439	352.2	0.47	352.2	0.53
352.4	0.327	352.4	0.332	352.4	0.372	352.4	0.416	352.4	0.489				352.4	0.284	352.4	0.422	352.4	0.44	352.4	0.472	352.4	0.532
352.6	0.329	352.6	0.333	352.6	0.374	352.6	0.418	352.6	0.492				352.6	0.286	352.6	0.424	352.6	0.442	352.6	0.474	352.6	0.535
352.8	0.331	352.8	0.335	352.8	0.376	352.8	0.42	352.8	0.494				352.8	0.287	352.8	0.426	352.8	0.444	352.8	0.476	352.8	0.537
353	0.333	353	0.337	353	0.377	353	0.422	353	0.496				353	0.289	353	0.427	353	0.446	353	0.478	353	0.539
353.2	0.334	353.2	0.338	353.2	0.379	353.2	0.424	353.2	0.498				353.2	0.29	353.2	0.429	353.2	0.447	353.2	0.48	353.2	0.542
353.4	0.336	353.4	0.34	353.4	0.381	353.4	0.426	353.4	0.501				353.4	0.29	353.4	0.431	353.4	0.449	353.4	0.482	353.4	0.544
353.6	0.338	353.6	0.341	353.6	0.383	353.6	0.428	353.6	0.503				353.6	0.291	353.6	0.432	353.6	0.451	353.6	0.484	353.6	0.546
353.8	0.339	353.8	0.343	353.8	0.385	353.8	0.431	353.8	0.505				353.8	0.292	353.8	0.433	353.8	0.453	353.8	0.486	353.8	0.549
354	0.34	354	0.344	354	0.387	354	0.433	354	0.507				354	0.293	354	0.435	354	0.454	354	0.488	354	0.551
354.2	0.342	354.2	0.346	354.2	0.388	354.2	0.435	354.2	0.51				354.2	0.294	354.2	0.437	354.2	0.455	354.2	0.489	354.2	0.553
354.4	0.344	354.4	0.348	354.4	0.39	354.4	0.437	354.4	0.512				354.4	0.295	354.4	0.438	354.4	0.457	354.4	0.492	354.4	0.555
354.6	0.345	354.6	0.35	354.6	0.392	354.6	0.439	354.6	0.514				354.6	0.296	354.6	0.44	354.6	0.459	354.6	0.493	354.6	0.557
354.8	0.347	354.8	0.351	354.8	0.394	354.8	0.441	354.8	0.517				354.8	0.297	354.8	0.441	354.8	0.46	354.8	0.495	354.8	0.559
355	0.349	355	0.353	355	0.396	355	0.443	355	0.519				355	0.298	355	0.443	355	0.462	355	0.497	355	0.562
355.2	0.351	355.2	0.355	355.2	0.398	355.2	0.445	355.2	0.521				355.2	0.299	355.2	0.444	355.2	0.463	355.2	0.499	355.2	0.564
355.4	0.353	355.4	0.356	355.4	0.4	355.4	0.447	355.4	0.524				355.4	0.3	355.4	0.446	355.4	0.466	355.4	0.502	355.4	0.567
355.6	0.355	355.6	0.358	355.6	0.402	355.6	0.449	355.6	0.527				355.6	0.301	355.6	0.447	355.6	0.467	355.6	0.504	355.6	0.57
355.8	0.356	355.8	0.36	355.8	0.404	355.8	0.452	355.8	0.529				355.8	0.303	355.8	0.45	355.8	0.469	355.8	0.506	355.8	0.572
356	0.358	356	0.362	356	0.406	356	0.454	356	0.532				356	0.304	356	0.452	356	0.471	356	0.508	356	0.575
356.2	0.359	356.2	0.363	356.2	0.408	356.2	0.457	356.2	0.534				356.2	0.305	356.2	0.453	356.2	0.473	356.2	0.509	356.2	0.577
356.4	0.361	356.4	0.365	356.4	0.41	356.4	0.459	356.4	0.536				356.4	0.306	356.4	0.455	356.4	0.475	356.4	0.511	356.4	0.579
356.6	0.363	356.6	0.367	356.6	0.412	356.6	0.461	356.6	0.538				356.6	0.307	356.6	0.456	356.6	0.476	356.6	0.514	356.6	0.582
356.8	0.365	356.8	0.368	356.8	0.413	356.8	0.464	356.8	0.541				356.8	0.308	356.8	0.458	356.8	0.478	356.8	0.516	356.8	0.585
357	0.367	357	0.37	357	0.416	357	0.465	357	0.543				357	0.309	357	0.46	357	0.48	357	0.518	357	0.587
357.2	0.368	357.2	0.372	357.2	0.417	357.2	0.467	357.2	0.546				357.2	0.311	357.2	0.461	357.2	0.481	357.2	0.52	357.2	0.59
357.4	0.37	357.4	0.374	357.4	0.419	357.4	0.469	357.4	0.549				357.4	0.311	357.4	0.463	357.4	0.483	357.4	0.522	357.4	0.591
357.6	0.372	357.6	0.375	357.6	0.421	357.6	0.471	357.6	0.55				357.6	0.312	357.6	0.464	357.6	0.485	357.6	0.524	357.6	0.594
357.8	0.373	357.8	0.377	357.8	0.423	357.8	0.474	357.8	0.553				357.8	0.313	357.8	0.466	357.8	0.487	357.8	0.525	357.8	0.596
358	0.375	358	0.379	358	0.426	358	0.476	358	0.556				358	0.314	358	0.468	358	0.489	358	0.527	358	0.598
358.2	0.376	358.2	0.381	358.2	0.428	358.2	0.478	358.2	0.558				358.2	0.315	358.2	0.469	358.2	0.491	358.2	0.529	358.2	0.601
358.4	0.378	358.4	0.383	358.4	0.429	358.4	0.48	358.4	0.561				358.4	0.316	358.4	0.471	358.4	0.492	358.4	0.531	358.4	0.604
358.6	0.38	358.6	0.384	358.6	0.431	358.6	0.483	358.6	0.563				358.6	0.317	358.6	0.473	358.6	0.494	358.6	0.533	358.6	0.606
358.8	0.382	358.8	0.386	358.8	0.433	358.8	0.485	358.8	0.566				358.8	0.318	358.8	0.474	358.8	0.495	358.8	0.536	358.8	0.609
359	0.384	359	0.388	359	0.435	359	0.487	359	0.568				359	0.32	359	0.476	359	0.497	359	0.538	359	0.611
359.2	0.386	359.2	0.389	359.2	0.437	359.2	0.489	359.2	0.57				359.2	0.321	359.2	0.477	359.2	0.499	359.2	0.54	359.2	0.614
359.4	0.388	359.4	0.392	359.4	0.439	359.4	0.491	359.4	0.573				359.4	0.322	359.4	0.479	359.4	0.501	359.4	0.542	359.4	0.616
359.6	0.389	359.6	0.393	359.6	0.441	359.6	0.493	359.6	0.575				359.6	0.324	359.6	0.482	359.6	0.503	359.6	0.545	359.6	0.619
359.8	0.391	359.8	0.395	359.8	0.444	359.8	0.496	359.8	0.579				359.8	0.325	359.8	0.484	359.8	0.505	359.8	0.548	359.8	0.622
360	0.393	360	0.397	360	0.447	360	0.499	360	0.583				360	0.326	360	0.486	360	0.507	360	0.551	360	0.625
360.2	0.395	360.2	0.398	360.2	0.449	360.2	0.502	360.2	0.587				360.2	0.327	360.2	0.488	360.2	0.51	360.2	0.553	360.2	0.628
360.4	0.397	360.4	0.401	360.4	0.452	360.4	0.504	360.4	0.59				360.4	0.328	360.4	0.49	360.4	0.512	360.4	0.556	360.4	0.63
360.6	0.399	360.6	0.402	360.6	0.454	360.6	0.507	360.6	0.593				360.6	0.329	360.6	0.492	360.6	0.513	360.6	0.558	360.6	0.633
360.8	0.401	360.8	0.404	360.8	0.457	360.8	0.509	360.8	0.595				360.8	0.33	360.8	0.494	360.8	0.515	360.8	0.56	360.8	0.635
361	0.403	361	0.406	361	0.459	361	0.511	361	0.598				361	0.331	361	0.495	361	0.517	361	0.562	361	0.638
361.2	0.405	361.2	0.408	361.2	0.461	361.2	0.514	361.2	0.601				361.2	0.332	361.2	0.497	361.2	0.519	361.2	0.564	361.2	0.64
361.4	0.407	361.4	0.41	361.4	0.463	361.4	0.516	361.4	0.603				361.4	0.333	361.4	0.499	361.4	0.521	361.4	0.567	361.4	0.643
361.6	0.409	361.6	0.412	361.6	0.465	361.6	0.518	361.6	0.606				361.6	0.334	361.6	0.501	361.6	0.523	361.6	0.569	361.6	0.645
361.8	0.411	361.8	0.414	361.8	0.467	361.8	0.52	361.8	0.608				361.8	0.335	361.8	0.503	361.8	0.525	361.8	0.571	361.8	0.648
362	0.413	362	0.415	362	0.469	362	0.523	362	0.611				362	0.337	362	0.504	362	0.527	362	0.573	362	0.651
362.2	0.415	362.2	0.417	362.2	0.471	362.2	0.525	362.2	0.613				362.2	0.338	362.2	0.506	362.2	0.529	362.2	0.575	362.2	0.654
362.4	0.417	362.4	0.419	362.4	0.473	362.4	0.527	362.4	0.616				362.4	0.339	362.4	0.508	362.4	0.531	362.4	0.578	362.4	0.656
362.6	0.419	362.6	0.421	362.6	0.476	362.6	0.53	362.6	0.618				362.6	0.34	362.6	0.51	362.6	0.533	362.6	0.58	362.6	0.659
362.8	0.421	362.8	0.423	362.8	0.478	362.8	0.532	362.8	0.621				362.8	0.342	362.8	0.512	362.8	0.535	362.8	0.582	362.8	0.662
363	0.423	363	0.426	363	0.48	363	0.535	363	0.623				363	0.343	363	0.514	363	0.537	363	0.585	363	0.665
363.2	0.425	363.2	0.428	363.2	0.482	363.2	0.537	363.2	0.626				363.2	0.344	363.2	0.515	363.2	0.539	363.2	0.587	363.2	0.668
363.4	0.426	363.4	0.429	363.4	0.484	363.4	0.539	363.4	0.629				363.4	0.345	363.4	0.517	363.4	0.54	363.4	0.589	363.4	0.67
363.6	0.428	363.6	0.431	363.6	0.486	363.6	0.542	363.6	0.631				363.6	0.346	363.6	0.519	363.6	0.542	363.6	0.591	363.6	0.673
363.8	0.43	363.8	0.433	363.8	0.488	363.8	0.544	363.8	0.634				363.8	0.347	363.8	0.521	363.8	0.544	363.8	0.594	363.8	0.676
364	0.432	364	0.435	364	0.491	364	0.546	364	0.637				364	0.348	364	0.523	364	0.546	364	0.596	364	0.678
364.2	0.434	364.2	0.437	364.2	0.493	364.2	0.549	364.2	0.64				364.2	0.349	364.2	0.524	364.2	0.548	364.2	0.598	364.2	0.681
364.4	0.436	364.4	0.438	364.4	0.495	364.4	0.551	364.4	0.642				364.4	0.351	364.4	0.526	364.4	0.55	364.4	0.6	364.4	0.684
364.6	0.438	364.6	0.44	364.6	0.497	364.6	0.553	364.6	0.645				364.6	0.352	364.6	0.528	364.6	0.552	364.6	0.602	364.6	0.686
364.8	0.44	364.8	0.442	364.8	0.5	364.8	0.556	364.8	0.648				364.8	0.353	364.8	0.53	364.8	0.554	364.8	0.605	364.8	0.689
365	0.442	365	0.444	365	0.502	365	0.558	365	0.651				365	0.354	365	0.532	365	0.556	365	0.607	365	0.693
365.2	0.444	365.2	0.447	365.2	0.504	365.2	0.561	365.2	0.654				365.2	0.356	365.2	0.534	365.2	0.559	365.2	0.61	365.2	0.695
365.4	0.446	365.4	0.448	365.4	0.507	365.4	0.563	365.4	0.656				365.4	0.357	365.4	0.536	365.4	0.561	365.4	0.612	365.4	0.699
365.6	0.448	365.6	0.45	365.6	0.509	365.6	0.565	365.6	0.659				365.6	0.358	365.6	0.538	365.6	0.563	365.6	0.615	365.6	0.701
365.8	0.45	365.8	0.452	365.8	0.511	365.8	0.568	365.8	0.662				365.8	0.359	365.8	0.54	365.8	0.565	365.8	0.617	365.8	0.704
366	0.452	366	0.454	366	0.513	366	0.57	366	0.664				366	0.361	366	0.542	366	0.567	366	0.619	366	0.707
366.2	0.454	366.2	0.457	366.2	0.515	366.2	0.573	366.2	0.667				366.2	0.362	366.2	0.544	366.2	0.569	366.2	0.622	366.2	0.71
366.4	0.456	366.4	0.459	366.4	0.518	366.4	0.575	366.4	0.67				366.4	0.363	366.4	0.546	366.4	0.571	366.4	0.625	366.4	0.714
366.6	0.458	366.6	0.461	366.6	0.52	366.6	0.578	366.6	0.673				366.6	0.365	366.6	0.548	366.6	0.574	366.6	0.627	366.6	0.717
366.8	0.461	366.8	0.463	366.8	0.523	366.8	0.58	366.8	0.676				366.8	0.366	366.8	0.55	366.8	0.576	366.8	0.63	366.8	0.72
367	0.463	367	0.465	367	0.525	367	0.583	367	0.679				367	0.367	367	0.553	367	0.578	367	0.632	367	0.723
367.2	0.465	367.2	0.467	367.2	0.527	367.2	0.585	367.2	0.682				367.2	0.369	367.2	0.555	367.2	0.58	367.2	0.635	367.2	0.726
367.4	0.467	367.4	0.469	367.4	0.53	367.4	0.588	367.4	0.685				367.4	0.37	367.4	0.557	367.4	0.583	367.4	0.637	367.4	0.729
367.6	0.469	367.6	0.471	367.6	0.532	367.6	0.59	367.6	0.687				367.6	0.372	367.6	0.559	367.6	0.585	367.6	0.64	367.6	0.732
367.8	0.471	367.8	0.473	367.8	0.535	367.8	0.593	367.8	0.69				367.8	0.373	367.8	0.561	367.8	0.587	367.8	0.642	367.8	0.735
368	0.473	368	0.475	368	0.537	368	0.595	368	0.693				368	0.374	368	0.563	368	0.589	368	0.645	368	0.738
368.2	0.476	368.2	0.477	368.2	0.54	368.2	0.598	368.2	0.696				368.2	0.376	368.2	0.565	368.2	0.591	368.2	0.647	368.2	0.741
368.4	0.478	368.4	0.48	368.4	0.542	368.4	0.6	368.4	0.699				368.4	0.377	368.4	0.567	368.4	0.593	368.4	0.65	368.4	0.745
368.6	0.48	368.6	0.482	368.6	0.544	368.6	0.603	368.6	0.702				368.6	0.378	368.6	0.569	368.6	0.595	368.6	0.653	368.6	0.748
368.8	0.482	368.8	0.484	368.8	0.546	368.8	0.606	368.8	0.704				368.8	0.38	368.8	0.571	368.8	0.598	368.8	0.655	368.8	0.751
369	0.484	369	0.486	369	0.549	369	0.608	369	0.707				369	0.381	369	0.573	369	0.6	369	0.658	369	0.754
369.2	0.486	369.2	0.488	369.2	0.551	369.2	0.61	369.2	0.71				369.2	0.382	369.2	0.575	369.2	0.602	369.2	0.66	369.2	0.756
369.4	0.488	369.4	0.49	369.4	0.553	369.4	0.613	369.4	0.712				369.4	0.383	369.4	0.577	369.4	0.604	369.4	0.662	369.4	0.759
369.6	0.49	369.6	0.492	369.6	0.556	369.6	0.615	369.6	0.715				369.6	0.385	369.6	0.579	369.6	0.606	369.6	0.665	369.6	0.762
369.8	0.492	369.8	0.494	369.8	0.558	369.8	0.618	369.8	0.718				369.8	0.386	369.8	0.581	369.8	0.609	369.8	0.667	369.8	0.765
370	0.495	370	0.496	370	0.561	370	0.62	370	0.721				370	0.387	370	0.584	370	0.611	370	0.67	370	0.768
370.2	0.497	370.2	0.498	370.2	0.563	370.2	0.623	370.2	0.724				370.2	0.389	370.2	0.586	370.2	0.613	370.2	0.673	370.2	0.772
370.4	0.499	370.4	0.501	370.4	0.565	370.4	0.625	370.4	0.727				370.4	0.39	370.4	0.588	370.4	0.616	370.4	0.675	370.4	0.775
370.6	0.501	370.6	0.503	370.6	0.568	370.6	0.628	370.6	0.73				370.6	0.392	370.6	0.59	370.6	0.618	370.6	0.678	370.6	0.778
370.8	0.503	370.8	0.506	370.8	0.57	370.8	0.631	370.8	0.733				370.8	0.393	370.8	0.592	370.8	0.62	370.8	0.681	370.8	0.782
371	0.505	371	0.508	371	0.573	371	0.633	371	0.736				371	0.395	371	0.595	371	0.623	371	0.684	371	0.785
371.2	0.507	371.2	0.51	371.2	0.575	371.2	0.636	371.2	0.739				371.2	0.396	371.2	0.597	371.2	0.625	371.2	0.687	371.2	0.788
371.4	0.51	371.4	0.512	371.4	0.578	371.4	0.639	371.4	0.742				371.4	0.397	371.4	0.599	371.4	0.628	371.4	0.69	371.4	0.791
371.6	0.512	371.6	0.514	371.6	0.58	371.6	0.641	371.6	0.745				371.6	0.399	371.6	0.601	371.6	0.63	371.6	0.692	371.6	0.794
371.8	0.514	371.8	0.516	371.8	0.582	371.8	0.644	371.8	0.748				371.8	0.4	371.8	0.603	371.8	0.632	371.8	0.695	371.8	0.797
372	0.517	372	0.518	372	0.585	372	0.646	372	0.751				372	0.402	372	0.606	372	0.635	372	0.698	372	0.801
372.2	0.519	372.2	0.52	372.2	0.587	372.2	0.649	372.2	0.754				372.2	0.404	372.2	0.608	372.2	0.637	372.2	0.7	372.2	0.804
372.4	0.521	372.4	0.523	372.4	0.589	372.4	0.652	372.4	0.757				372.4	0.405	372.4	0.61	372.4	0.64	372.4	0.703	372.4	0.807
372.6	0.523	372.6	0.525	372.6	0.592	372.6	0.654	372.6	0.76				372.6	0.407	372.6	0.612	372.6	0.642	372.6	0.706	372.6	0.811
372.8	0.526	372.8	0.527	372.8	0.594	372.8	0.657	372.8	0.763				372.8	0.408	372.8	0.614	372.8	0.645	372.8	0.708	372.8	0.814
373	0.528	373	0.529	373	0.597	373	0.659	373	0.766				373	0.409	373	0.617	373	0.647	373	0.711	373	0.817
373.2	0.53	373.2	0.531	373.2	0.6	373.2	0.662	373.2	0.769				373.2	0.411	373.2	0.619	373.2	0.649	373.2	0.714	373.2	0.821
373.4	0.532	373.4	0.533	373.4	0.602	373.4	0.665	373.4	0.772				373.4	0.412	373.4	0.621	373.4	0.652	373.4	0.717	373.4	0.824
373.6	0.535	373.6	0.535	373.6	0.604	373.6	0.667	373.6	0.775				373.6	0.414	373.6	0.624	373.6	0.654	373.6	0.72	373.6	0.827
373.8	0.537	373.8	0.538	373.8	0.607	373.8	0.67	373.8	0.778				373.8	0.415	373.8	0.626	373.8	0.657	373.8	0.723	373.8	0.83
374	0.539	374	0.54	374	0.609	374	0.673	374	0.781				374	0.417	374	0.629	374	0.659	374	0.726	374	0.834
374.2	0.541	374.2	0.542	374.2	0.612	374.2	0.676	374.2	0.784				374.2	0.418	374.2	0.631	374.2	0.662	374.2	0.729	374.2	0.837
374.4	0.544	374.4	0.544	374.4	0.614	374.4	0.678	374.4	0.787				374.4	0.42	374.4	0.633	374.4	0.664	374.4	0.732	374.4	0.84
374.6	0.546	374.6	0.546	374.6	0.617	374.6	0.681	374.6	0.789				374.6	0.421	374.6	0.636	374.6	0.667	374.6	0.734	374.6	0.844
374.8	0.549	374.8	0.549	374.8	0.619	374.8	0.684	374.8	0.793				374.8	0.423	374.8	0.638	374.8	0.67	374.8	0.737	374.8	0.847
375	0.551	375	0.551	375	0.622	375	0.687	375	0.796				375	0.424	375	0.641	375	0.673	375	0.74	375	0.851
375.2	0.553	375.2	0.554	375.2	0.625	375.2	0.689	375.2	0.799				375.2	0.426	375.2	0.643	375.2	0.675	375.2	0.743	375.2	0.854
375.4	0.555	375.4	0.556	375.4	0.627	375.4	0.692	375.4	0.802				375.4	0.428	375.4	0.645	375.4	0.678	375.4	0.746	375.4	0.857
375.6	0.558	375.6	0.558	375.6	0.63	375.6	0.695	375.6	0.805				375.6	0.43	375.6	0.648	375.6	0.681	375.6	0.749	375.6	0.861
375.8	0.56	375.8	0.561	375.8	0.632	375.8	0.698	375.8	0.808				375.8	0.431	375.8	0.65	375.8	0.683	375.8	0.752	375.8	0.864
376	0.562	376	0.563	376	0.635	376	0.701	376	0.811				376	0.433	376	0.653	376	0.686	376	0.756	376	0.868
376.2	0.565	376.2	0.565	376.2	0.637	376.2	0.703	376.2	0.814				376.2	0.434	376.2	0.655	376.2	0.689	376.2	0.759	376.2	0.871
376.4	0.567	376.4	0.567	376.4	0.64	376.4	0.706	376.4	0.817				376.4	0.436	376.4	0.658	376.4	0.692	376.4	0.762	376.4	0.875
376.6	0.57	376.6	0.57	376.6	0.643	376.6	0.709	376.6	0.82				376.6	0.438	376.6	0.66	376.6	0.694	376.6	0.765	376.6	0.878
376.8	0.572	376.8	0.572	376.8	0.645	376.8	0.712	376.8	0.823				376.8	0.439	376.8	0.663	376.8	0.697	376.8	0.768	376.8	0.881
377	0.574	377	0.574	377	0.648	377	0.714	377	0.826				377	0.441	377	0.665	377	0.7	377	0.771	377	0.885
377.2	0.576	377.2	0.576	377.2	0.65	377.2	0.717	377.2	0.829				377.2	0.442	377.2	0.668	377.2	0.703	377.2	0.774	377.2	0.888
377.4	0.579	377.4	0.579	377.4	0.653	377.4	0.72	377.4	0.832				377.4	0.444	377.4	0.67	377.4	0.705	377.4	0.777	377.4	0.892
377.6	0.581	377.6	0.581	377.6	0.656	377.6	0.723	377.6	0.836				377.6	0.446	377.6	0.673	377.6	0.708	377.6	0.78	377.6	0.895
377.8	0.584	377.8	0.583	377.8	0.659	377.8	0.726	377.8	0.839				377.8	0.448	377.8	0.676	377.8	0.711	377.8	0.783	377.8	0.898
378	0.586	378	0.586	378	0.661	378	0.729	378	0.842				378	0.449	378	0.678	378	0.713	378	0.786	378	0.902
378.2	0.588	378.2	0.588	378.2	0.664	378.2	0.731	378.2	0.845				378.2	0.451	378.2	0.681	378.2	0.716	378.2	0.789	378.2	0.905
378.4	0.591	378.4	0.59	378.4	0.667	378.4	0.734	378.4	0.848				378.4	0.452	378.4	0.683	378.4	0.719	378.4	0.792	378.4	0.908
378.6	0.593	378.6	0.593	378.6	0.669	378.6	0.737	378.6	0.851				378.6	0.454	378.6	0.686	378.6	0.721	378.6	0.795	378.6	0.912
378.8	0.596	378.8	0.595	378.8	0.672	378.8	0.739	378.8	0.854				378.8	0.455	378.8	0.688	378.8	0.724	378.8	0.798	378.8	0.915
379	0.598	379	0.597	379	0.675	379	0.743	379	0.857				379	0.457	379	0.691	379	0.727	379	0.801	379	0.919
379.2	0.601	379.2	0.6	379.2	0.677	379.2	0.745	379.2	0.86				379.2	0.459	379.2	0.693	379.2	0.73	379.2	0.804	379.2	0.922
379.4	0.603	379.4	0.602	379.4	0.68	379.4	0.748	379.4	0.864				379.4	0.461	379.4	0.696	379.4	0.733	379.4	0.807	379.4	0.926
379.6	0.605	379.6	0.605	379.6	0.683	379.6	0.751	379.6	0.867				379.6	0.463	379.6	0.699	379.6	0.736	379.6	0.811	379.6	0.929
379.8	0.608	379.8	0.607	379.8	0.686	379.8	0.754	379.8	0.87				379.8	0.464	379.8	0.702	379.8	0.739	379.8	0.814	379.8	0.933
380	0.61	380	0.61	380	0.689	380	0.758	380	0.873				380	0.466	380	0.705	380	0.742	380	0.817	380	0.936
380.2	0.613	380.2	0.612	380.2	0.692	380.2	0.761	380.2	0.876				380.2	0.468	380.2	0.708	380.2	0.745	380.2	0.821	380.2	0.94
380.4	0.616	380.4	0.615	380.4	0.695	380.4	0.764	380.4	0.88				380.4	0.47	380.4	0.711	380.4	0.748	380.4	0.824	380.4	0.944
380.6	0.618	380.6	0.617	380.6	0.697	380.6	0.767	380.6	0.883				380.6	0.472	380.6	0.714	380.6	0.751	380.6	0.828	380.6	0.948
380.8	0.621	380.8	0.619	380.8	0.7	380.8	0.77	380.8	0.886				380.8	0.474	380.8	0.717	380.8	0.754	380.8	0.831	380.8	0.951
381	0.623	381	0.622	381	0.703	381	0.772	381	0.889				381	0.475	381	0.719	381	0.757	381	0.834	381	0.955
381.2	0.626	381.2	0.624	381.2	0.706	381.2	0.775	381.2	0.892				381.2	0.477	381.2	0.722	381.2	0.76	381.2	0.837	381.2	0.959
381.4	0.628	381.4	0.627	381.4	0.709	381.4	0.778	381.4	0.895				381.4	0.479	381.4	0.725	381.4	0.764	381.4	0.841	381.4	0.962
381.6	0.631	381.6	0.629	381.6	0.712	381.6	0.781	381.6	0.898				381.6	0.481	381.6	0.728	381.6	0.767	381.6	0.844	381.6	0.966
381.8	0.633	381.8	0.632	381.8	0.715	381.8	0.784	381.8	0.902				381.8	0.483	381.8	0.73	381.8	0.77	381.8	0.847	381.8	0.97
382	0.636	382	0.634	382	0.717	382	0.787	382	0.905				382	0.484	382	0.733	382	0.773	382	0.85	382	0.974
382.2	0.638	382.2	0.637	382.2	0.72	382.2	0.79	382.2	0.908				382.2	0.486	382.2	0.736	382.2	0.776	382.2	0.854	382.2	0.977
382.4	0.641	382.4	0.639	382.4	0.723	382.4	0.793	382.4	0.911				382.4	0.488	382.4	0.739	382.4	0.779	382.4	0.857	382.4	0.981
382.6	0.643	382.6	0.641	382.6	0.726	382.6	0.796	382.6	0.914				382.6	0.49	382.6	0.742	382.6	0.782	382.6	0.86	382.6	0.984
382.8	0.646	382.8	0.644	382.8	0.729	382.8	0.798	382.8	0.917				382.8	0.491	382.8	0.745	382.8	0.785	382.8	0.863	382.8	0.988
383	0.648	383	0.646	383	0.731	383	0.801	383	0.92				383	0.493	383	0.747	383	0.788	383	0.867	383	0.991
383.2	0.651	383.2	0.649	383.2	0.734	383.2	0.805	383.2	0.923				383.2	0.495	383.2	0.75	383.2	0.791	383.2	0.87	383.2	0.995
383.4	0.653	383.4	0.651	383.4	0.737	383.4	0.808	383.4	0.926				383.4	0.497	383.4	0.753	383.4	0.794	383.4	0.873	383.4	0.999
383.6	0.656	383.6	0.654	383.6	0.74	383.6	0.811	383.6	0.929				383.6	0.499	383.6	0.756	383.6	0.797	383.6	0.877	383.6	1.003
383.8	0.659	383.8	0.656	383.8	0.743	383.8	0.814	383.8	0.933				383.8	0.5	383.8	0.759	383.8	0.8	383.8	0.88	383.8	1.007
384	0.662	384	0.659	384	0.746	384	0.817	384	0.936				384	0.502	384	0.762	384	0.804	384	0.884	384	1.011
384.2	0.665	384.2	0.662	384.2	0.749	384.2	0.82	384.2	0.939				384.2	0.504	384.2	0.765	384.2	0.807	384.2	0.887	384.2	1.015
384.4	0.667	384.4	0.664	384.4	0.752	384.4	0.823	384.4	0.942				384.4	0.506	384.4	0.768	384.4	0.81	384.4	0.89	384.4	1.018
384.6	0.67	384.6	0.666	384.6	0.755	384.6	0.826	384.6	0.946				384.6	0.508	384.6	0.771	384.6	0.813	384.6	0.894	384.6	1.022
384.8	0.672	384.8	0.669	384.8	0.758	384.8	0.829	384.8	0.949				384.8	0.51	384.8	0.774	384.8	0.817	384.8	0.897	384.8	1.026
385	0.675	385	0.672	385	0.761	385	0.832	385	0.952				385	0.512	385	0.777	385	0.82	385	0.9	385	1.03
385.2	0.678	385.2	0.674	385.2	0.764	385.2	0.835	385.2	0.956				385.2	0.514	385.2	0.78	385.2	0.823	385.2	0.904	385.2	1.034
385.4	0.68	385.4	0.677	385.4	0.766	385.4	0.838	385.4	0.959				385.4	0.516	385.4	0.783	385.4	0.827	385.4	0.907	385.4	1.038
385.6	0.683	385.6	0.68	385.6	0.77	385.6	0.841	385.6	0.962				385.6	0.518	385.6	0.787	385.6	0.83	385.6	0.911	385.6	1.042
385.8	0.686	385.8	0.682	385.8	0.773	385.8	0.844	385.8	0.965				385.8	0.52	385.8	0.79	385.8	0.833	385.8	0.915	385.8	1.046
386	0.688	386	0.685	386	0.775	386	0.847	386	0.969				386	0.521	386	0.793	386	0.837	386	0.918	386	1.049
386.2	0.691	386.2	0.688	386.2	0.779	386.2	0.85	386.2	0.972				386.2	0.523	386.2	0.796	386.2	0.84	386.2	0.921	386.2	1.053
386.4	0.694	386.4	0.69	386.4	0.781	386.4	0.853	386.4	0.975				386.4	0.525	386.4	0.799	386.4	0.843	386.4	0.925	386.4	1.057
386.6	0.696	386.6	0.693	386.6	0.784	386.6	0.856	386.6	0.978				386.6	0.527	386.6	0.802	386.6	0.846	386.6	0.928	386.6	1.061
386.8	0.699	386.8	0.695	386.8	0.787	386.8	0.859	386.8	0.981				386.8	0.529	386.8	0.805	386.8	0.85	386.8	0.932	386.8	1.064
387	0.702	387	0.698	387	0.79	387	0.862	387	0.984				387	0.531	387	0.808	387	0.853	387	0.935	387	1.068
387.2	0.705	387.2	0.7	387.2	0.793	387.2	0.865	387.2	0.988				387.2	0.533	387.2	0.811	387.2	0.856	387.2	0.939	387.2	1.072
387.4	0.707	387.4	0.703	387.4	0.796	387.4	0.868	387.4	0.991				387.4	0.535	387.4	0.814	387.4	0.859	387.4	0.942	387.4	1.075
387.6	0.71	387.6	0.705	387.6	0.799	387.6	0.871	387.6	0.994				387.6	0.537	387.6	0.817	387.6	0.863	387.6	0.945	387.6	1.079
387.8	0.713	387.8	0.708	387.8	0.802	387.8	0.874	387.8	0.998				387.8	0.539	387.8	0.821	387.8	0.866	387.8	0.949	387.8	1.083
388	0.715	388	0.711	388	0.805	388	0.877	388	1.001				388	0.541	388	0.824	388	0.869	388	0.953	388	1.087
388.2	0.718	388.2	0.713	388.2	0.808	388.2	0.879	388.2	1.004				388.2	0.543	388.2	0.827	388.2	0.873	388.2	0.956	388.2	1.091
388.4	0.721	388.4	0.716	388.4	0.811	388.4	0.883	388.4	1.007				388.4	0.545	388.4	0.83	388.4	0.876	388.4	0.96	388.4	1.095
388.6	0.724	388.6	0.718	388.6	0.814	388.6	0.885	388.6	1.01				388.6	0.546	388.6	0.833	388.6	0.879	388.6	0.963	388.6	1.099
388.8	0.726	388.8	0.721	388.8	0.817	388.8	0.889	388.8	1.014				388.8	0.548	388.8	0.836	388.8	0.883	388.8	0.967	388.8	1.103
389	0.729	389	0.724	389	0.82	389	0.892	389	1.017				389	0.551	389	0.84	389	0.886	389	0.971	389	1.107
389.2	0.732	389.2	0.726	389.2	0.823	389.2	0.895	389.2	1.02				389.2	0.553	389.2	0.843	389.2	0.89	389.2	0.974	389.2	1.111
389.4	0.735	389.4	0.729	389.4	0.826	389.4	0.898	389.4	1.024				389.4	0.555	389.4	0.847	389.4	0.893	389.4	0.978	389.4	1.115
389.6	0.737	389.6	0.732	389.6	0.829	389.6	0.901	389.6	1.027				389.6	0.557	389.6	0.85	389.6	0.896	389.6	0.982	389.6	1.119
389.8	0.74	389.8	0.734	389.8	0.832	389.8	0.904	389.8	1.03				389.8	0.559	389.8	0.853	389.8	0.9	389.8	0.986	389.8	1.123
390	0.743	390	0.737	390	0.835	390	0.907	390	1.034				390	0.561	390	0.856	390	0.903	390	0.99	390	1.126
390.2	0.745	390.2	0.74	390.2	0.838	390.2	0.909	390.2	1.037				390.2	0.563	390.2	0.859	390.2	0.907	390.2	0.993	390.2	1.13
390.4	0.748	390.4	0.743	390.4	0.841	390.4	0.912	390.4	1.041				390.4	0.565	390.4	0.863	390.4	0.91	390.4	0.997	390.4	1.134
390.6	0.751	390.6	0.745	390.6	0.844	390.6	0.915	390.6	1.044				390.6	0.567	390.6	0.866	390.6	0.914	390.6	1	390.6	1.138
390.8	0.754	390.8	0.748	390.8	0.847	390.8	0.919	390.8	1.047				390.8	0.569	390.8	0.869	390.8	0.917	390.8	1.004	390.8	1.141
391	0.757	391	0.75	391	0.85	391	0.921	391	1.05				391	0.571	391	0.872	391	0.92	391	1.007	391	1.145
391.2	0.759	391.2	0.753	391.2	0.853	391.2	0.924	391.2	1.053				391.2	0.573	391.2	0.875	391.2	0.924	391.2	1.011	391.2	1.149
391.4	0.762	391.4	0.756	391.4	0.856	391.4	0.927	391.4	1.056				391.4	0.575	391.4	0.878	391.4	0.927	391.4	1.014	391.4	1.153
391.6	0.764	391.6	0.758	391.6	0.858	391.6	0.93	391.6	1.059				391.6	0.577	391.6	0.882	391.6	0.931	391.6	1.018	391.6	1.157
391.8	0.767	391.8	0.761	391.8	0.861	391.8	0.933	391.8	1.063				391.8	0.579	391.8	0.885	391.8	0.934	391.8	1.022	391.8	1.161
392	0.77	392	0.763	392	0.864	392	0.936	392	1.066				392	0.58	392	0.889	392	0.937	392	1.026	392	1.164
392.2	0.773	392.2	0.766	392.2	0.867	392.2	0.939	392.2	1.07				392.2	0.583	392.2	0.892	392.2	0.941	392.2	1.029	392.2	1.168
392.4	0.776	392.4	0.769	392.4	0.871	392.4	0.942	392.4	1.073				392.4	0.585	392.4	0.896	392.4	0.945	392.4	1.033	392.4	1.172
392.6	0.779	392.6	0.772	392.6	0.874	392.6	0.945	392.6	1.076				392.6	0.587	392.6	0.899	392.6	0.949	392.6	1.037	392.6	1.176
392.8	0.782	392.8	0.774	392.8	0.877	392.8	0.948	392.8	1.079				392.8	0.589	392.8	0.902	392.8	0.952	392.8	1.041	392.8	1.18
393	0.784	393	0.777	393	0.88	393	0.951	393	1.082				393	0.591	393	0.905	393	0.955	393	1.044	393	1.183
393.2	0.787	393.2	0.779	393.2	0.882	393.2	0.954	393.2	1.085				393.2	0.593	393.2	0.908	393.2	0.959	393.2	1.048	393.2	1.187
393.4	0.789	393.4	0.782	393.4	0.885	393.4	0.957	393.4	1.089				393.4	0.595	393.4	0.912	393.4	0.962	393.4	1.051	393.4	1.191
393.6	0.792	393.6	0.784	393.6	0.888	393.6	0.96	393.6	1.092				393.6	0.597	393.6	0.915	393.6	0.966	393.6	1.055	393.6	1.194
393.8	0.795	393.8	0.787	393.8	0.891	393.8	0.963	393.8	1.095				393.8	0.598	393.8	0.918	393.8	0.97	393.8	1.059	393.8	1.198
394	0.797	394	0.789	394	0.894	394	0.966	394	1.098				394	0.6	394	0.921	394	0.973	394	1.062	394	1.202
394.2	0.8	394.2	0.792	394.2	0.897	394.2	0.969	394.2	1.101				394.2	0.602	394.2	0.924	394.2	0.977	394.2	1.066	394.2	1.205
394.4	0.803	394.4	0.795	394.4	0.899	394.4	0.972	394.4	1.104				394.4	0.604	394.4	0.928	394.4	0.98	394.4	1.07	394.4	1.209
394.6	0.805	394.6	0.797	394.6	0.902	394.6	0.975	394.6	1.108				394.6	0.606	394.6	0.931	394.6	0.984	394.6	1.074	394.6	1.213
394.8	0.808	394.8	0.8	394.8	0.905	394.8	0.978	394.8	1.11				394.8	0.608	394.8	0.934	394.8	0.987	394.8	1.077	394.8	1.217
395	0.811	395	0.802	395	0.908	395	0.981	395	1.114				395	0.61	395	0.938	395	0.991	395	1.081	395	1.22
395.2	0.813	395.2	0.805	395.2	0.911	395.2	0.984	395.2	1.117				395.2	0.612	395.2	0.941	395.2	0.995	395.2	1.085	395.2	1.224
395.4	0.816	395.4	0.808	395.4	0.914	395.4	0.987	395.4	1.12				395.4	0.614	395.4	0.944	395.4	0.998	395.4	1.089	395.4	1.228
395.6	0.819	395.6	0.81	395.6	0.917	395.6	0.99	395.6	1.124				395.6	0.616	395.6	0.948	395.6	1.002	395.6	1.093	395.6	1.231
395.8	0.821	395.8	0.813	395.8	0.92	395.8	0.993	395.8	1.127				395.8	0.618	395.8	0.951	395.8	1.005	395.8	1.097	395.8	1.235
396	0.824	396	0.815	396	0.922	396	0.996	396	1.13				396	0.62	396	0.955	396	1.009	396	1.1	396	1.239
396.2	0.826	396.2	0.818	396.2	0.925	396.2	0.998	396.2	1.133				396.2	0.622	396.2	0.958	396.2	1.012	396.2	1.104	396.2	1.243
396.4	0.829	396.4	0.82	396.4	0.928	396.4	1.001	396.4	1.136				396.4	0.624	396.4	0.961	396.4	1.016	396.4	1.108	396.4	1.246
396.6	0.832	396.6	0.823	396.6	0.931	396.6	1.004	396.6	1.139				396.6	0.626	396.6	0.965	396.6	1.02	396.6	1.111	396.6	1.25
396.8	0.834	396.8	0.826	396.8	0.934	396.8	1.007	396.8	1.142				396.8	0.628	396.8	0.968	396.8	1.024	396.8	1.115	396.8	1.254
397	0.837	397	0.828	397	0.937	397	1.01	397	1.146				397	0.63	397	0.972	397	1.027	397	1.119	397	1.258
397.2	0.84	397.2	0.831	397.2	0.94	397.2	1.012	397.2	1.149				397.2	0.632	397.2	0.975	397.2	1.031	397.2	1.123	397.2	1.262
397.4	0.842	397.4	0.833	397.4	0.943	397.4	1.016	397.4	1.152				397.4	0.634	397.4	0.979	397.4	1.035	397.4	1.126	397.4	1.265
397.6	0.845	397.6	0.836	397.6	0.945	397.6	1.018	397.6	1.155				397.6	0.636	397.6	0.982	397.6	1.038	397.6	1.13	397.6	1.269
397.8	0.848	397.8	0.838	397.8	0.948	397.8	1.021	397.8	1.158				397.8	0.638	397.8	0.985	397.8	1.041	397.8	1.134	397.8	1.272
398	0.85	398	0.84	398	0.95	398	1.024	398	1.16				398	0.64	398	0.989	398	1.045	398	1.137	398	1.275
398.2	0.852	398.2	0.843	398.2	0.953	398.2	1.027	398.2	1.163				398.2	0.641	398.2	0.992	398.2	1.048	398.2	1.141	398.2	1.279
398.4	0.854	398.4	0.845	398.4	0.956	398.4	1.03	398.4	1.166				398.4	0.643	398.4	0.995	398.4	1.052	398.4	1.144	398.4	1.283
398.6	0.857	398.6	0.847	398.6	0.959	398.6	1.033	398.6	1.169				398.6	0.645	398.6	0.998	398.6	1.056	398.6	1.147	398.6	1.286
398.8	0.859	398.8	0.85	398.8	0.962	398.8	1.036	398.8	1.172				398.8	0.647	398.8	1.002	398.8	1.059	398.8	1.151	398.8	1.29
399	0.862	399	0.852	399	0.964	399	1.038	399	1.175				399	0.649	399	1.005	399	1.063	399	1.155	399	1.293
399.2	0.864	399.2	0.854	399.2	0.967	399.2	1.041	399.2	1.178				399.2	0.65	399.2	1.008	399.2	1.066	399.2	1.158	399.2	1.296
399.4	0.866	399.4	0.857	399.4	0.969	399.4	1.043	399.4	1.181				399.4	0.652	399.4	1.012	399.4	1.07	399.4	1.162	399.4	1.3
399.6	0.869	399.6	0.859	399.6	0.972	399.6	1.045	399.6	1.184				399.6	0.654	399.6	1.015	399.6	1.073	399.6	1.165	399.6	1.303
399.8	0.871	399.8	0.861	399.8	0.974	399.8	1.048	399.8	1.186				399.8	0.656	399.8	1.018	399.8	1.076	399.8	1.168	399.8	1.306
400	0.873	400	0.863	400	0.977	400	1.05	400	1.189				400	0.657	400	1.021	400	1.079	400	1.171	400	1.309
400.2	0.875	400.2	0.865	400.2	0.979	400.2	1.053	400.2	1.192				400.2	0.659	400.2	1.024	400.2	1.082	400.2	1.174	400.2	1.312
400.4	0.877	400.4	0.867	400.4	0.981	400.4	1.055	400.4	1.195				400.4	0.66	400.4	1.026	400.4	1.085	400.4	1.178	400.4	1.315
400.6	0.879	400.6	0.869	400.6	0.984	400.6	1.058	400.6	1.197				400.6	0.662	400.6	1.029	400.6	1.088	400.6	1.181	400.6	1.318
400.8	0.881	400.8	0.871	400.8	0.986	400.8	1.06	400.8	1.2				400.8	0.664	400.8	1.032	400.8	1.091	400.8	1.184	400.8	1.322
401	0.883	401	0.873	401	0.989	401	1.063	401	1.202				401	0.665	401	1.035	401	1.095	401	1.187	401	1.325
401.2	0.885	401.2	0.875	401.2	0.991	401.2	1.065	401.2	1.205				401.2	0.667	401.2	1.038	401.2	1.098	401.2	1.191	401.2	1.328
401.4	0.887	401.4	0.877	401.4	0.994	401.4	1.067	401.4	1.207				401.4	0.669	401.4	1.041	401.4	1.101	401.4	1.194	401.4	1.331
401.6	0.89	401.6	0.879	401.6	0.996	401.6	1.07	401.6	1.209				401.6	0.67	401.6	1.044	401.6	1.105	401.6	1.197	401.6	1.334
401.8	0.892	401.8	0.881	401.8	0.998	401.8	1.072	401.8	1.212				401.8	0.672	401.8	1.047	401.8	1.108	401.8	1.2	401.8	1.337
402	0.893	402	0.883	402	1.001	402	1.074	402	1.214				402	0.673	402	1.05	402	1.111	402	1.203	402	1.34
402.2	0.895	402.2	0.885	402.2	1.003	402.2	1.076	402.2	1.217				402.2	0.675	402.2	1.053	402.2	1.114	402.2	1.206	402.2	1.343
402.4	0.897	402.4	0.887	402.4	1.006	402.4	1.079	402.4	1.22				402.4	0.677	402.4	1.056	402.4	1.116	402.4	1.209	402.4	1.346
402.6	0.899	402.6	0.889	402.6	1.008	402.6	1.081	402.6	1.222				402.6	0.678	402.6	1.06	402.6	1.119	402.6	1.212	402.6	1.349
402.8	0.901	402.8	0.891	402.8	1.01	402.8	1.083	402.8	1.225				402.8	0.68	402.8	1.062	402.8	1.122	402.8	1.215	402.8	1.352
403	0.903	403	0.892	403	1.012	403	1.085	403	1.227				403	0.681	403	1.065	403	1.125	403	1.217	403	1.355
403.2	0.905	403.2	0.894	403.2	1.014	403.2	1.088	403.2	1.229				403.2	0.682	403.2	1.067	403.2	1.128	403.2	1.22	403.2	1.357
403.4	0.906	403.4	0.896	403.4	1.016	403.4	1.09	403.4	1.231				403.4	0.683	403.4	1.07	403.4	1.13	403.4	1.222	403.4	1.36
403.6	0.908	403.6	0.898	403.6	1.018	403.6	1.092	403.6	1.234				403.6	0.685	403.6	1.072	403.6	1.133	403.6	1.225	403.6	1.362
403.8	0.91	403.8	0.899	403.8	1.02	403.8	1.094	403.8	1.236				403.8	0.686	403.8	1.075	403.8	1.136	403.8	1.228	403.8	1.365
404	0.911	404	0.901	404	1.022	404	1.096	404	1.238				404	0.688	404	1.077	404	1.138	404	1.231	404	1.368
404.2	0.913	404.2	0.902	404.2	1.023	404.2	1.098	404.2	1.24				404.2	0.689	404.2	1.08	404.2	1.141	404.2	1.233	404.2	1.37
404.4	0.915	404.4	0.904	404.4	1.025	404.4	1.1	404.4	1.242				404.4	0.69	404.4	1.082	404.4	1.143	404.4	1.236	404.4	1.372
404.6	0.916	404.6	0.905	404.6	1.027	404.6	1.102	404.6	1.244				404.6	0.691	404.6	1.084	404.6	1.145	404.6	1.238	404.6	1.374
404.8	0.918	404.8	0.907	404.8	1.029	404.8	1.103	404.8	1.247				404.8	0.692	404.8	1.087	404.8	1.148	404.8	1.241	404.8	1.376
405	0.919	405	0.908	405	1.031	405	1.105	405	1.248				405	0.693	405	1.089	405	1.15	405	1.243	405	1.379
405.2	0.92	405.2	0.91	405.2	1.033	405.2	1.106	405.2	1.25				405.2	0.695	405.2	1.091	405.2	1.153	405.2	1.245	405.2	1.381
405.4	0.922	405.4	0.911	405.4	1.035	405.4	1.108	405.4	1.252				405.4	0.696	405.4	1.094	405.4	1.155	405.4	1.248	405.4	1.383
405.6	0.923	405.6	0.912	405.6	1.037	405.6	1.11	405.6	1.254				405.6	0.697	405.6	1.096	405.6	1.157	405.6	1.25	405.6	1.386
405.8	0.924	405.8	0.914	405.8	1.038	405.8	1.111	405.8	1.256				405.8	0.698	405.8	1.098	405.8	1.159	405.8	1.252	405.8	1.388
406	0.926	406	0.915	406	1.04	406	1.113	406	1.258				406	0.699	406	1.1	406	1.161	406	1.255	406	1.39
406.2	0.927	406.2	0.917	406.2	1.041	406.2	1.115	406.2	1.26				406.2	0.7	406.2	1.102	406.2	1.164	406.2	1.257	406.2	1.392
406.4	0.929	406.4	0.918	406.4	1.043	406.4	1.117	406.4	1.262				406.4	0.701	406.4	1.104	406.4	1.166	406.4	1.259	406.4	1.394
406.6	0.93	406.6	0.919	406.6	1.044	406.6	1.118	406.6	1.263				406.6	0.702	406.6	1.106	406.6	1.168	406.6	1.261	406.6	1.396
406.8	0.932	406.8	0.921	406.8	1.046	406.8	1.12	406.8	1.265				406.8	0.703	406.8	1.108	406.8	1.17	406.8	1.263	406.8	1.398
407	0.933	407	0.922	407	1.048	407	1.121	407	1.267				407	0.703	407	1.111	407	1.172	407	1.265	407	1.399
407.2	0.934	407.2	0.923	407.2	1.049	407.2	1.123	407.2	1.269				407.2	0.704	407.2	1.113	407.2	1.174	407.2	1.267	407.2	1.401
407.4	0.935	407.4	0.924	407.4	1.05	407.4	1.124	407.4	1.27				407.4	0.705	407.4	1.114	407.4	1.176	407.4	1.269	407.4	1.403
407.6	0.936	407.6	0.925	407.6	1.052	407.6	1.125	407.6	1.272				407.6	0.706	407.6	1.116	407.6	1.177	407.6	1.271	407.6	1.404
407.8	0.937	407.8	0.926	407.8	1.053	407.8	1.126	407.8	1.274				407.8	0.707	407.8	1.118	407.8	1.179	407.8	1.273	407.8	1.406
408	0.938	408	0.927	408	1.055	408	1.128	408	1.275				408	0.708	408	1.119	408	1.181	408	1.275	408	1.408
408.2	0.939	408.2	0.928	408.2	1.056	408.2	1.129	408.2	1.277				408.2	0.708	408.2	1.121	408.2	1.182	408.2	1.276	408.2	1.409
408.4	0.94	408.4	0.929	408.4	1.057	408.4	1.131	408.4	1.278				408.4	0.709	408.4	1.123	408.4	1.184	408.4	1.278	408.4	1.411
408.6	0.941	408.6	0.93	408.6	1.058	408.6	1.132	408.6	1.279				408.6	0.71	408.6	1.124	408.6	1.186	408.6	1.28	408.6	1.412
408.8	0.941	408.8	0.931	408.8	1.059	408.8	1.133	408.8	1.28				408.8	0.71	408.8	1.126	408.8	1.188	408.8	1.281	408.8	1.413
409	0.942	409	0.932	409	1.06	409	1.134	409	1.281				409	0.711	409	1.127	409	1.189	409	1.283	409	1.415
409.2	0.943	409.2	0.933	409.2	1.061	409.2	1.135	409.2	1.283				409.2	0.711	409.2	1.129	409.2	1.19	409.2	1.284	409.2	1.416
409.4	0.944	409.4	0.933	409.4	1.062	409.4	1.136	409.4	1.284				409.4	0.712	409.4	1.13	409.4	1.192	409.4	1.286	409.4	1.417
409.6	0.945	409.6	0.934	409.6	1.064	409.6	1.137	409.6	1.285				409.6	0.712	409.6	1.131	409.6	1.193	409.6	1.287	409.6	1.418
409.8	0.945	409.8	0.935	409.8	1.065	409.8	1.138	409.8	1.286				409.8	0.713	409.8	1.133	409.8	1.194	409.8	1.289	409.8	1.419
410	0.946	410	0.936	410	1.066	410	1.139	410	1.287				410	0.713	410	1.134	410	1.195	410	1.29	410	1.42
410.2	0.947	410.2	0.936	410.2	1.067	410.2	1.14	410.2	1.288				410.2	0.714	410.2	1.135	410.2	1.196	410.2	1.291	410.2	1.421
410.4	0.947	410.4	0.937	410.4	1.067	410.4	1.141	410.4	1.289				410.4	0.714	410.4	1.136	410.4	1.197	410.4	1.292	410.4	1.422
410.6	0.948	410.6	0.937	410.6	1.068	410.6	1.142	410.6	1.29				410.6	0.715	410.6	1.138	410.6	1.198	410.6	1.293	410.6	1.423
410.8	0.948	410.8	0.938	410.8	1.069	410.8	1.143	410.8	1.291				410.8	0.715	410.8	1.138	410.8	1.199	410.8	1.294	410.8	1.424
411	0.949	411	0.938	411	1.069	411	1.143	411	1.292				411	0.715	411	1.139	411	1.2	411	1.295	411	1.425
411.2	0.949	411.2	0.939	411.2	1.07	411.2	1.144	411.2	1.293				411.2	0.716	411.2	1.14	411.2	1.201	411.2	1.296	411.2	1.425
411.4	0.95	411.4	0.939	411.4	1.07	411.4	1.144	411.4	1.294				411.4	0.716	411.4	1.141	411.4	1.202	411.4	1.297	411.4	1.425
411.6	0.95	411.6	0.94	411.6	1.071	411.6	1.145	411.6	1.295				411.6	0.716	411.6	1.142	411.6	1.203	411.6	1.298	411.6	1.426
411.8	0.951	411.8	0.941	411.8	1.072	411.8	1.146	411.8	1.296				411.8	0.716	411.8	1.143	411.8	1.204	411.8	1.299	411.8	1.427
412	0.951	412	0.941	412	1.072	412	1.146	412	1.297				412	0.717	412	1.144	412	1.204	412	1.3	412	1.428
412.2	0.951	412.2	0.942	412.2	1.073	412.2	1.147	412.2	1.298				412.2	0.717	412.2	1.145	412.2	1.205	412.2	1.301	412.2	1.428
412.4	0.952	412.4	0.942	412.4	1.074	412.4	1.148	412.4	1.298				412.4	0.717	412.4	1.145	412.4	1.206	412.4	1.301	412.4	1.428
412.6	0.952	412.6	0.942	412.6	1.075	412.6	1.148	412.6	1.299				412.6	0.717	412.6	1.146	412.6	1.207	412.6	1.302	412.6	1.428
412.8	0.952	412.8	0.943	412.8	1.075	412.8	1.149	412.8	1.299				412.8	0.717	412.8	1.146	412.8	1.207	412.8	1.303	412.8	1.428
413	0.953	413	0.943	413	1.075	413	1.149	413	1.3				413	0.717	413	1.147	413	1.208	413	1.303	413	1.428
413.2	0.953	413.2	0.943	413.2	1.076	413.2	1.149	413.2	1.3				413.2	0.717	413.2	1.147	413.2	1.208	413.2	1.303	413.2	1.428
413.4	0.953	413.4	0.944	413.4	1.076	413.4	1.15	413.4	1.301				413.4	0.717	413.4	1.148	413.4	1.208	413.4	1.303	413.4	1.429
413.6	0.953	413.6	0.943	413.6	1.076	413.6	1.15	413.6	1.301				413.6	0.717	413.6	1.148	413.6	1.209	413.6	1.303	413.6	1.429
413.8	0.953	413.8	0.943	413.8	1.076	413.8	1.15	413.8	1.301				413.8	0.717	413.8	1.148	413.8	1.209	413.8	1.303	413.8	1.428
414	0.953	414	0.943	414	1.076	414	1.15	414	1.301				414	0.717	414	1.148	414	1.209	414	1.303	414	1.428
414.2	0.953	414.2	0.943	414.2	1.076	414.2	1.15	414.2	1.302				414.2	0.716	414.2	1.149	414.2	1.208	414.2	1.303	414.2	1.428
414.4	0.953	414.4	0.943	414.4	1.076	414.4	1.15	414.4	1.302				414.4	0.716	414.4	1.149	414.4	1.208	414.4	1.303	414.4	1.427
414.6	0.953	414.6	0.943	414.6	1.076	414.6	1.151	414.6	1.302				414.6	0.716	414.6	1.149	414.6	1.209	414.6	1.303	414.6	1.427
414.8	0.953	414.8	0.943	414.8	1.076	414.8	1.151	414.8	1.302				414.8	0.716	414.8	1.149	414.8	1.209	414.8	1.303	414.8	1.427
415	0.952	415	0.943	415	1.077	415	1.15	415	1.302				415	0.716	415	1.149	415	1.208	415	1.303	415	1.426
415.2	0.952	415.2	0.943	415.2	1.077	415.2	1.15	415.2	1.302				415.2	0.716	415.2	1.149	415.2	1.208	415.2	1.303	415.2	1.426
415.4	0.952	415.4	0.943	415.4	1.077	415.4	1.15	415.4	1.302				415.4	0.715	415.4	1.149	415.4	1.208	415.4	1.303	415.4	1.425
415.6	0.952	415.6	0.943	415.6	1.077	415.6	1.15	415.6	1.302				415.6	0.715	415.6	1.149	415.6	1.207	415.6	1.302	415.6	1.425
415.8	0.952	415.8	0.943	415.8	1.076	415.8	1.15	415.8	1.302				415.8	0.715	415.8	1.149	415.8	1.207	415.8	1.302	415.8	1.424
416	0.951	416	0.943	416	1.076	416	1.15	416	1.302				416	0.714	416	1.149	416	1.207	416	1.302	416	1.423
416.2	0.951	416.2	0.943	416.2	1.076	416.2	1.15	416.2	1.302				416.2	0.714	416.2	1.149	416.2	1.206	416.2	1.301	416.2	1.422
416.4	0.951	416.4	0.943	416.4	1.076	416.4	1.15	416.4	1.301				416.4	0.714	416.4	1.148	416.4	1.206	416.4	1.301	416.4	1.421
416.6	0.951	416.6	0.942	416.6	1.076	416.6	1.15	416.6	1.301				416.6	0.713	416.6	1.148	416.6	1.206	416.6	1.3	416.6	1.42
416.8	0.95	416.8	0.942	416.8	1.076	416.8	1.15	416.8	1.301				416.8	0.713	416.8	1.147	416.8	1.205	416.8	1.299	416.8	1.419
417	0.95	417	0.941	417	1.075	417	1.149	417	1.3				417	0.712	417	1.146	417	1.204	417	1.298	417	1.418
417.2	0.949	417.2	0.941	417.2	1.075	417.2	1.149	417.2	1.3				417.2	0.712	417.2	1.146	417.2	1.203	417.2	1.298	417.2	1.417
417.4	0.949	417.4	0.94	417.4	1.074	417.4	1.148	417.4	1.3				417.4	0.711	417.4	1.145	417.4	1.202	417.4	1.297	417.4	1.415
417.6	0.948	417.6	0.94	417.6	1.073	417.6	1.147	417.6	1.299				417.6	0.71	417.6	1.145	417.6	1.202	417.6	1.296	417.6	1.414
417.8	0.947	417.8	0.939	417.8	1.073	417.8	1.147	417.8	1.299				417.8	0.71	417.8	1.144	417.8	1.2	417.8	1.295	417.8	1.412
418	0.947	418	0.939	418	1.072	418	1.146	418	1.298				418	0.709	418	1.143	418	1.199	418	1.293	418	1.411
418.2	0.946	418.2	0.938	418.2	1.072	418.2	1.146	418.2	1.298				418.2	0.708	418.2	1.142	418.2	1.198	418.2	1.292	418.2	1.409
418.4	0.945	418.4	0.938	418.4	1.071	418.4	1.145	418.4	1.297				418.4	0.707	418.4	1.142	418.4	1.197	418.4	1.291	418.4	1.408
418.6	0.945	418.6	0.937	418.6	1.071	418.6	1.145	418.6	1.296				418.6	0.707	418.6	1.141	418.6	1.196	418.6	1.29	418.6	1.406
418.8	0.944	418.8	0.936	418.8	1.07	418.8	1.144	418.8	1.295				418.8	0.706	418.8	1.14	418.8	1.195	418.8	1.289	418.8	1.405
419	0.943	419	0.936	419	1.069	419	1.143	419	1.294				419	0.705	419	1.139	419	1.193	419	1.287	419	1.403
419.2	0.943	419.2	0.935	419.2	1.069	419.2	1.142	419.2	1.293				419.2	0.705	419.2	1.138	419.2	1.192	419.2	1.286	419.2	1.401
419.4	0.942	419.4	0.934	419.4	1.068	419.4	1.141	419.4	1.292				419.4	0.704	419.4	1.137	419.4	1.191	419.4	1.284	419.4	1.399
419.6	0.941	419.6	0.934	419.6	1.067	419.6	1.141	419.6	1.292				419.6	0.703	419.6	1.135	419.6	1.189	419.6	1.283	419.6	1.397
419.8	0.94	419.8	0.933	419.8	1.066	419.8	1.14	419.8	1.291				419.8	0.702	419.8	1.135	419.8	1.188	419.8	1.281	419.8	1.395
420	0.939	420	0.932	420	1.066	420	1.139	420	1.29				420	0.701	420	1.134	420	1.187	420	1.279	420	1.393
420.2	0.938	420.2	0.931	420.2	1.065	420.2	1.138	420.2	1.289				420.2	0.7	420.2	1.132	420.2	1.185	420.2	1.278	420.2	1.391
420.4	0.938	420.4	0.93	420.4	1.064	420.4	1.137	420.4	1.288				420.4	0.7	420.4	1.131	420.4	1.184	420.4	1.276	420.4	1.389
420.6	0.937	420.6	0.929	420.6	1.063	420.6	1.136	420.6	1.287				420.6	0.699	420.6	1.129	420.6	1.182	420.6	1.274	420.6	1.386
420.8	0.936	420.8	0.928	420.8	1.061	420.8	1.135	420.8	1.286				420.8	0.698	420.8	1.128	420.8	1.181	420.8	1.272	420.8	1.384
421	0.935	421	0.927	421	1.06	421	1.134	421	1.285				421	0.697	421	1.126	421	1.179	421	1.27	421	1.382
421.2	0.933	421.2	0.926	421.2	1.059	421.2	1.132	421.2	1.284				421.2	0.696	421.2	1.125	421.2	1.177	421.2	1.269	421.2	1.38
421.4	0.932	421.4	0.925	421.4	1.058	421.4	1.131	421.4	1.282				421.4	0.695	421.4	1.123	421.4	1.175	421.4	1.267	421.4	1.377
421.6	0.931	421.6	0.925	421.6	1.057	421.6	1.13	421.6	1.281				421.6	0.694	421.6	1.122	421.6	1.173	421.6	1.265	421.6	1.374
421.8	0.93	421.8	0.924	421.8	1.056	421.8	1.129	421.8	1.28				421.8	0.693	421.8	1.12	421.8	1.171	421.8	1.263	421.8	1.372
422	0.929	422	0.923	422	1.055	422	1.128	422	1.278				422	0.692	422	1.118	422	1.169	422	1.261	422	1.369
422.2	0.927	422.2	0.922	422.2	1.054	422.2	1.127	422.2	1.277				422.2	0.691	422.2	1.117	422.2	1.167	422.2	1.259	422.2	1.366
422.4	0.926	422.4	0.92	422.4	1.053	422.4	1.125	422.4	1.275				422.4	0.689	422.4	1.115	422.4	1.165	422.4	1.256	422.4	1.364
422.6	0.925	422.6	0.919	422.6	1.051	422.6	1.124	422.6	1.274				422.6	0.689	422.6	1.113	422.6	1.163	422.6	1.254	422.6	1.361
422.8	0.924	422.8	0.918	422.8	1.05	422.8	1.122	422.8	1.272				422.8	0.687	422.8	1.112	422.8	1.161	422.8	1.252	422.8	1.358
423	0.922	423	0.917	423	1.048	423	1.121	423	1.271				423	0.686	423	1.109	423	1.159	423	1.249	423	1.355
423.2	0.921	423.2	0.916	423.2	1.047	423.2	1.12	423.2	1.269				423.2	0.685	423.2	1.108	423.2	1.156	423.2	1.247	423.2	1.352
423.4	0.919	423.4	0.914	423.4	1.045	423.4	1.118	423.4	1.268				423.4	0.684	423.4	1.106	423.4	1.154	423.4	1.244	423.4	1.349
423.6	0.918	423.6	0.913	423.6	1.044	423.6	1.117	423.6	1.266				423.6	0.683	423.6	1.104	423.6	1.152	423.6	1.242	423.6	1.345
423.8	0.917	423.8	0.912	423.8	1.042	423.8	1.115	423.8	1.264				423.8	0.682	423.8	1.102	423.8	1.149	423.8	1.239	423.8	1.343
424	0.915	424	0.91	424	1.041	424	1.113	424	1.263				424	0.68	424	1.099	424	1.147	424	1.237	424	1.34
424.2	0.914	424.2	0.909	424.2	1.039	424.2	1.112	424.2	1.261				424.2	0.679	424.2	1.097	424.2	1.145	424.2	1.234	424.2	1.337
424.4	0.912	424.4	0.907	424.4	1.038	424.4	1.11	424.4	1.259				424.4	0.678	424.4	1.095	424.4	1.142	424.4	1.231	424.4	1.334
424.6	0.911	424.6	0.906	424.6	1.036	424.6	1.108	424.6	1.257				424.6	0.676	424.6	1.093	424.6	1.139	424.6	1.229	424.6	1.33
424.8	0.91	424.8	0.905	424.8	1.035	424.8	1.106	424.8	1.255				424.8	0.675	424.8	1.091	424.8	1.136	424.8	1.226	424.8	1.326
425	0.908	425	0.903	425	1.033	425	1.105	425	1.253				425	0.674	425	1.089	425	1.134	425	1.223	425	1.323
425.2	0.907	425.2	0.902	425.2	1.031	425.2	1.103	425.2	1.252				425.2	0.672	425.2	1.086	425.2	1.131	425.2	1.22	425.2	1.319
425.4	0.905	425.4	0.9	425.4	1.03	425.4	1.101	425.4	1.25				425.4	0.671	425.4	1.084	425.4	1.128	425.4	1.217	425.4	1.316
425.6	0.904	425.6	0.899	425.6	1.028	425.6	1.099	425.6	1.248				425.6	0.669	425.6	1.081	425.6	1.126	425.6	1.214	425.6	1.313
425.8	0.902	425.8	0.898	425.8	1.026	425.8	1.097	425.8	1.246				425.8	0.668	425.8	1.079	425.8	1.123	425.8	1.211	425.8	1.309
426	0.9	426	0.896	426	1.024	426	1.096	426	1.244				426	0.667	426	1.077	426	1.12	426	1.208	426	1.306
426.2	0.898	426.2	0.895	426.2	1.022	426.2	1.093	426.2	1.242				426.2	0.665	426.2	1.074	426.2	1.117	426.2	1.205	426.2	1.302
426.4	0.897	426.4	0.893	426.4	1.02	426.4	1.092	426.4	1.239				426.4	0.664	426.4	1.072	426.4	1.114	426.4	1.202	426.4	1.298
426.6	0.895	426.6	0.891	426.6	1.019	426.6	1.09	426.6	1.237				426.6	0.662	426.6	1.069	426.6	1.111	426.6	1.198	426.6	1.294
426.8	0.893	426.8	0.889	426.8	1.017	426.8	1.087	426.8	1.235				426.8	0.661	426.8	1.066	426.8	1.108	426.8	1.195	426.8	1.29
427	0.891	427	0.887	427	1.015	427	1.086	427	1.233				427	0.659	427	1.064	427	1.105	427	1.192	427	1.287
427.2	0.89	427.2	0.886	427.2	1.013	427.2	1.084	427.2	1.231				427.2	0.658	427.2	1.061	427.2	1.102	427.2	1.189	427.2	1.283
427.4	0.888	427.4	0.884	427.4	1.011	427.4	1.081	427.4	1.228				427.4	0.656	427.4	1.059	427.4	1.099	427.4	1.186	427.4	1.279
427.6	0.886	427.6	0.882	427.6	1.009	427.6	1.079	427.6	1.226				427.6	0.655	427.6	1.056	427.6	1.095	427.6	1.182	427.6	1.275
427.8	0.884	427.8	0.881	427.8	1.007	427.8	1.077	427.8	1.224				427.8	0.653	427.8	1.053	427.8	1.092	427.8	1.178	427.8	1.271
428	0.882	428	0.879	428	1.004	428	1.074	428	1.222				428	0.651	428	1.05	428	1.089	428	1.175	428	1.267
428.2	0.88	428.2	0.877	428.2	1.002	428.2	1.072	428.2	1.219				428.2	0.65	428.2	1.047	428.2	1.085	428.2	1.171	428.2	1.262
428.4	0.878	428.4	0.875	428.4	1	428.4	1.07	428.4	1.217				428.4	0.648	428.4	1.044	428.4	1.082	428.4	1.168	428.4	1.258
428.6	0.876	428.6	0.873	428.6	0.998	428.6	1.067	428.6	1.214				428.6	0.647	428.6	1.041	428.6	1.078	428.6	1.164	428.6	1.254
428.8	0.874	428.8	0.871	428.8	0.996	428.8	1.065	428.8	1.212				428.8	0.645	428.8	1.039	428.8	1.075	428.8	1.161	428.8	1.25
429	0.872	429	0.869	429	0.994	429	1.063	429	1.21				429	0.644	429	1.035	429	1.072	429	1.157	429	1.246
429.2	0.87	429.2	0.868	429.2	0.992	429.2	1.06	429.2	1.207				429.2	0.642	429.2	1.033	429.2	1.069	429.2	1.154	429.2	1.242
429.4	0.868	429.4	0.866	429.4	0.99	429.4	1.058	429.4	1.204				429.4	0.64	429.4	1.03	429.4	1.065	429.4	1.15	429.4	1.238
429.6	0.866	429.6	0.864	429.6	0.988	429.6	1.055	429.6	1.202				429.6	0.639	429.6	1.026	429.6	1.062	429.6	1.147	429.6	1.234
429.8	0.864	429.8	0.862	429.8	0.985	429.8	1.053	429.8	1.199				429.8	0.637	429.8	1.023	429.8	1.058	429.8	1.143	429.8	1.229
430	0.862	430	0.86	430	0.983	430	1.051	430	1.197				430	0.636	430	1.02	430	1.054	430	1.139	430	1.225
430.2	0.86	430.2	0.858	430.2	0.981	430.2	1.048	430.2	1.194				430.2	0.634	430.2	1.017	430.2	1.051	430.2	1.135	430.2	1.22
430.4	0.858	430.4	0.856	430.4	0.978	430.4	1.046	430.4	1.191				430.4	0.632	430.4	1.014	430.4	1.047	430.4	1.131	430.4	1.216
430.6	0.856	430.6	0.854	430.6	0.976	430.6	1.044	430.6	1.188				430.6	0.63	430.6	1.011	430.6	1.043	430.6	1.127	430.6	1.212
430.8	0.853	430.8	0.851	430.8	0.973	430.8	1.041	430.8	1.185				430.8	0.628	430.8	1.008	430.8	1.039	430.8	1.123	430.8	1.207
431	0.851	431	0.849	431	0.971	431	1.038	431	1.183				431	0.626	431	1.004	431	1.035	431	1.118	431	1.203
431.2	0.849	431.2	0.847	431.2	0.968	431.2	1.036	431.2	1.18				431.2	0.625	431.2	1.001	431.2	1.032	431.2	1.114	431.2	1.198
431.4	0.847	431.4	0.845	431.4	0.966	431.4	1.033	431.4	1.177				431.4	0.623	431.4	0.998	431.4	1.028	431.4	1.11	431.4	1.193
431.6	0.845	431.6	0.843	431.6	0.963	431.6	1.03	431.6	1.175				431.6	0.621	431.6	0.995	431.6	1.024	431.6	1.106	431.6	1.189
431.8	0.842	431.8	0.841	431.8	0.961	431.8	1.027	431.8	1.172				431.8	0.619	431.8	0.992	431.8	1.02	431.8	1.103	431.8	1.184
432	0.84	432	0.838	432	0.958	432	1.025	432	1.168				432	0.618	432	0.988	432	1.016	432	1.098	432	1.179
432.2	0.837	432.2	0.836	432.2	0.955	432.2	1.021	432.2	1.166				432.2	0.616	432.2	0.985	432.2	1.012	432.2	1.094	432.2	1.175
432.4	0.835	432.4	0.834	432.4	0.953	432.4	1.019	432.4	1.162				432.4	0.614	432.4	0.981	432.4	1.008	432.4	1.089	432.4	1.17
432.6	0.833	432.6	0.831	432.6	0.95	432.6	1.016	432.6	1.159				432.6	0.612	432.6	0.978	432.6	1.004	432.6	1.085	432.6	1.165
432.8	0.83	432.8	0.829	432.8	0.948	432.8	1.013	432.8	1.156				432.8	0.61	432.8	0.974	432.8	1	432.8	1.08	432.8	1.16
433	0.828	433	0.827	433	0.945	433	1.01	433	1.153				433	0.608	433	0.971	433	0.996	433	1.076	433	1.155
433.2	0.825	433.2	0.824	433.2	0.942	433.2	1.007	433.2	1.15				433.2	0.607	433.2	0.967	433.2	0.992	433.2	1.072	433.2	1.15
433.4	0.822	433.4	0.822	433.4	0.939	433.4	1.004	433.4	1.147				433.4	0.605	433.4	0.964	433.4	0.988	433.4	1.067	433.4	1.145
433.6	0.82	433.6	0.819	433.6	0.936	433.6	1.001	433.6	1.143				433.6	0.603	433.6	0.96	433.6	0.984	433.6	1.063	433.6	1.14
433.8	0.817	433.8	0.817	433.8	0.934	433.8	0.998	433.8	1.14				433.8	0.601	433.8	0.957	433.8	0.98	433.8	1.058	433.8	1.135
434	0.814	434	0.814	434	0.931	434	0.995	434	1.137				434	0.599	434	0.953	434	0.975	434	1.054	434	1.129
434.2	0.812	434.2	0.812	434.2	0.928	434.2	0.992	434.2	1.134				434.2	0.598	434.2	0.95	434.2	0.971	434.2	1.049	434.2	1.125
434.4	0.809	434.4	0.809	434.4	0.925	434.4	0.989	434.4	1.13				434.4	0.596	434.4	0.946	434.4	0.967	434.4	1.045	434.4	1.119
434.6	0.807	434.6	0.807	434.6	0.922	434.6	0.985	434.6	1.127				434.6	0.594	434.6	0.942	434.6	0.963	434.6	1.04	434.6	1.114
434.8	0.804	434.8	0.804	434.8	0.919	434.8	0.982	434.8	1.123				434.8	0.592	434.8	0.939	434.8	0.959	434.8	1.036	434.8	1.109
435	0.801	435	0.801	435	0.916	435	0.979	435	1.12				435	0.589	435	0.935	435	0.954	435	1.031	435	1.103
435.2	0.798	435.2	0.799	435.2	0.913	435.2	0.975	435.2	1.116				435.2	0.588	435.2	0.931	435.2	0.95	435.2	1.026	435.2	1.098
435.4	0.796	435.4	0.796	435.4	0.91	435.4	0.972	435.4	1.113				435.4	0.585	435.4	0.928	435.4	0.945	435.4	1.021	435.4	1.093
435.6	0.793	435.6	0.793	435.6	0.907	435.6	0.969	435.6	1.109				435.6	0.583	435.6	0.924	435.6	0.941	435.6	1.017	435.6	1.087
435.8	0.79	435.8	0.791	435.8	0.904	435.8	0.966	435.8	1.106				435.8	0.582	435.8	0.92	435.8	0.937	435.8	1.012	435.8	1.082
436	0.788	436	0.789	436	0.901	436	0.963	436	1.102				436	0.58	436	0.917	436	0.933	436	1.008	436	1.077
436.2	0.785	436.2	0.786	436.2	0.899	436.2	0.96	436.2	1.099				436.2	0.578	436.2	0.913	436.2	0.929	436.2	1.003	436.2	1.072
436.4	0.783	436.4	0.784	436.4	0.896	436.4	0.957	436.4	1.096				436.4	0.576	436.4	0.91	436.4	0.925	436.4	0.999	436.4	1.067
436.6	0.78	436.6	0.781	436.6	0.893	436.6	0.954	436.6	1.092				436.6	0.574	436.6	0.906	436.6	0.921	436.6	0.994	436.6	1.062
436.8	0.777	436.8	0.778	436.8	0.89	436.8	0.951	436.8	1.089				436.8	0.572	436.8	0.903	436.8	0.917	436.8	0.99	436.8	1.057
437	0.774	437	0.776	437	0.887	437	0.947	437	1.085				437	0.57	437	0.899	437	0.912	437	0.985	437	1.052
437.2	0.771	437.2	0.773	437.2	0.884	437.2	0.944	437.2	1.081				437.2	0.568	437.2	0.895	437.2	0.908	437.2	0.98	437.2	1.046
437.4	0.768	437.4	0.77	437.4	0.88	437.4	0.941	437.4	1.078				437.4	0.566	437.4	0.891	437.4	0.904	437.4	0.976	437.4	1.041
437.6	0.766	437.6	0.767	437.6	0.877	437.6	0.937	437.6	1.074				437.6	0.564	437.6	0.888	437.6	0.9	437.6	0.971	437.6	1.036
437.8	0.762	437.8	0.764	437.8	0.874	437.8	0.934	437.8	1.07				437.8	0.562	437.8	0.884	437.8	0.895	437.8	0.966	437.8	1.03
438	0.76	438	0.761	438	0.871	438	0.93	438	1.066				438	0.56	438	0.88	438	0.891	438	0.962	438	1.025
438.2	0.757	438.2	0.758	438.2	0.867	438.2	0.926	438.2	1.062				438.2	0.558	438.2	0.876	438.2	0.887	438.2	0.957	438.2	1.019
438.4	0.754	438.4	0.755	438.4	0.864	438.4	0.923	438.4	1.058				438.4	0.556	438.4	0.872	438.4	0.883	438.4	0.952	438.4	1.014
438.6	0.751	438.6	0.753	438.6	0.861	438.6	0.92	438.6	1.054				438.6	0.554	438.6	0.869	438.6	0.878	438.6	0.948	438.6	1.008
438.8	0.748	438.8	0.75	438.8	0.858	438.8	0.916	438.8	1.051				438.8	0.552	438.8	0.865	438.8	0.874	438.8	0.943	438.8	1.003
439	0.745	439	0.747	439	0.855	439	0.913	439	1.047				439	0.55	439	0.861	439	0.869	439	0.938	439	0.998
439.2	0.742	439.2	0.744	439.2	0.852	439.2	0.91	439.2	1.043				439.2	0.548	439.2	0.858	439.2	0.865	439.2	0.933	439.2	0.992
439.4	0.74	439.4	0.742	439.4	0.848	439.4	0.906	439.4	1.04				439.4	0.547	439.4	0.854	439.4	0.861	439.4	0.929	439.4	0.987
439.6	0.737	439.6	0.739	439.6	0.845	439.6	0.903	439.6	1.036				439.6	0.545	439.6	0.85	439.6	0.856	439.6	0.924	439.6	0.982
439.8	0.734	439.8	0.736	439.8	0.841	439.8	0.899	439.8	1.032				439.8	0.542	439.8	0.846	439.8	0.852	439.8	0.919	439.8	0.977
440	0.731	440	0.733	440	0.838	440	0.896	440	1.028				440	0.54	440	0.842	440	0.848	440	0.915	440	0.972
440.2	0.728	440.2	0.73	440.2	0.835	440.2	0.893	440.2	1.024				440.2	0.538	440.2	0.838	440.2	0.843	440.2	0.91	440.2	0.966
440.4	0.725	440.4	0.727	440.4	0.831	440.4	0.889	440.4	1.02				440.4	0.536	440.4	0.834	440.4	0.839	440.4	0.905	440.4	0.961
440.6	0.722	440.6	0.725	440.6	0.828	440.6	0.886	440.6	1.016				440.6	0.534	440.6	0.831	440.6	0.835	440.6	0.9	440.6	0.955
440.8	0.719	440.8	0.722	440.8	0.825	440.8	0.882	440.8	1.013				440.8	0.533	440.8	0.827	440.8	0.831	440.8	0.896	440.8	0.95
441	0.716	441	0.719	441	0.822	441	0.879	441	1.009				441	0.531	441	0.823	441	0.826	441	0.891	441	0.945
441.2	0.713	441.2	0.716	441.2	0.819	441.2	0.876	441.2	1.005				441.2	0.529	441.2	0.82	441.2	0.822	441.2	0.887	441.2	0.94
441.4	0.71	441.4	0.714	441.4	0.815	441.4	0.872	441.4	1.002				441.4	0.527	441.4	0.816	441.4	0.818	441.4	0.883	441.4	0.936
441.6	0.708	441.6	0.711	441.6	0.813	441.6	0.869	441.6	0.998				441.6	0.525	441.6	0.812	441.6	0.814	441.6	0.878	441.6	0.931
441.8	0.705	441.8	0.708	441.8	0.809	441.8	0.865	441.8	0.994				441.8	0.523	441.8	0.809	441.8	0.809	441.8	0.874	441.8	0.926
442	0.702	442	0.705	442	0.806	442	0.862	442	0.99				442	0.521	442	0.805	442	0.805	442	0.87	442	0.921
442.2	0.699	442.2	0.702	442.2	0.803	442.2	0.858	442.2	0.986				442.2	0.519	442.2	0.801	442.2	0.801	442.2	0.865	442.2	0.915
442.4	0.695	442.4	0.699	442.4	0.799	442.4	0.855	442.4	0.982				442.4	0.517	442.4	0.797	442.4	0.796	442.4	0.86	442.4	0.91
442.6	0.692	442.6	0.697	442.6	0.795	442.6	0.851	442.6	0.978				442.6	0.515	442.6	0.793	442.6	0.792	442.6	0.855	442.6	0.905
442.8	0.689	442.8	0.693	442.8	0.792	442.8	0.847	442.8	0.973				442.8	0.513	442.8	0.789	442.8	0.788	442.8	0.85	442.8	0.9
443	0.686	443	0.69	443	0.788	443	0.844	443	0.969				443	0.511	443	0.786	443	0.783	443	0.846	443	0.895
443.2	0.683	443.2	0.687	443.2	0.785	443.2	0.84	443.2	0.965				443.2	0.509	443.2	0.782	443.2	0.779	443.2	0.841	443.2	0.89
443.4	0.68	443.4	0.684	443.4	0.781	443.4	0.836	443.4	0.962				443.4	0.507	443.4	0.778	443.4	0.775	443.4	0.836	443.4	0.885
443.6	0.677	443.6	0.682	443.6	0.778	443.6	0.833	443.6	0.957				443.6	0.505	443.6	0.774	443.6	0.771	443.6	0.832	443.6	0.88
443.8	0.674	443.8	0.679	443.8	0.774	443.8	0.829	443.8	0.953				443.8	0.503	443.8	0.771	443.8	0.767	443.8	0.827	443.8	0.875
444	0.671	444	0.676	444	0.771	444	0.825	444	0.95				444	0.502	444	0.767	444	0.762	444	0.823	444	0.87
444.2	0.668	444.2	0.673	444.2	0.768	444.2	0.822	444.2	0.946				444.2	0.5	444.2	0.764	444.2	0.758	444.2	0.819	444.2	0.865
444.4	0.665	444.4	0.67	444.4	0.765	444.4	0.818	444.4	0.942				444.4	0.498	444.4	0.761	444.4	0.754	444.4	0.814	444.4	0.86
444.6	0.662	444.6	0.667	444.6	0.761	444.6	0.815	444.6	0.938				444.6	0.496	444.6	0.757	444.6	0.75	444.6	0.81	444.6	0.855
444.8	0.659	444.8	0.664	444.8	0.758	444.8	0.811	444.8	0.933				444.8	0.494	444.8	0.753	444.8	0.746	444.8	0.805	444.8	0.851
445	0.656	445	0.661	445	0.754	445	0.807	445	0.929				445	0.492	445	0.749	445	0.742	445	0.801	445	0.846
445.2	0.654	445.2	0.658	445.2	0.751	445.2	0.804	445.2	0.925				445.2	0.49	445.2	0.745	445.2	0.738	445.2	0.796	445.2	0.841
445.4	0.651	445.4	0.655	445.4	0.747	445.4	0.8	445.4	0.921				445.4	0.488	445.4	0.742	445.4	0.734	445.4	0.791	445.4	0.836
445.6	0.647	445.6	0.652	445.6	0.743	445.6	0.796	445.6	0.917				445.6	0.486	445.6	0.738	445.6	0.729	445.6	0.787	445.6	0.83
445.8	0.644	445.8	0.649	445.8	0.74	445.8	0.792	445.8	0.913				445.8	0.484	445.8	0.734	445.8	0.725	445.8	0.782	445.8	0.825
446	0.641	446	0.646	446	0.736	446	0.788	446	0.909				446	0.482	446	0.731	446	0.721	446	0.778	446	0.82
446.2	0.638	446.2	0.643	446.2	0.733	446.2	0.785	446.2	0.905				446.2	0.48	446.2	0.727	446.2	0.717	446.2	0.773	446.2	0.815
446.4	0.635	446.4	0.641	446.4	0.729	446.4	0.781	446.4	0.901				446.4	0.478	446.4	0.724	446.4	0.713	446.4	0.769	446.4	0.811
446.6	0.633	446.6	0.638	446.6	0.726	446.6	0.777	446.6	0.897				446.6	0.477	446.6	0.72	446.6	0.709	446.6	0.764	446.6	0.806
446.8	0.63	446.8	0.635	446.8	0.723	446.8	0.774	446.8	0.893				446.8	0.475	446.8	0.717	446.8	0.705	446.8	0.76	446.8	0.801
447	0.627	447	0.632	447	0.719	447	0.77	447	0.889				447	0.473	447	0.713	447	0.701	447	0.756	447	0.796
447.2	0.624	447.2	0.629	447.2	0.716	447.2	0.766	447.2	0.885				447.2	0.471	447.2	0.709	447.2	0.697	447.2	0.751	447.2	0.792
447.4	0.621	447.4	0.626	447.4	0.712	447.4	0.763	447.4	0.881				447.4	0.469	447.4	0.706	447.4	0.693	447.4	0.747	447.4	0.786
447.6	0.618	447.6	0.623	447.6	0.709	447.6	0.759	447.6	0.877				447.6	0.467	447.6	0.702	447.6	0.689	447.6	0.742	447.6	0.782
447.8	0.615	447.8	0.62	447.8	0.706	447.8	0.756	447.8	0.873				447.8	0.465	447.8	0.698	447.8	0.685	447.8	0.738	447.8	0.777
448	0.612	448	0.618	448	0.703	448	0.752	448	0.869				448	0.463	448	0.695	448	0.682	448	0.733	448	0.772
448.2	0.609	448.2	0.615	448.2	0.699	448.2	0.748	448.2	0.865				448.2	0.462	448.2	0.692	448.2	0.678	448.2	0.729	448.2	0.768
448.4	0.606	448.4	0.612	448.4	0.696	448.4	0.745	448.4	0.861				448.4	0.46	448.4	0.688	448.4	0.674	448.4	0.725	448.4	0.763
448.6	0.604	448.6	0.609	448.6	0.693	448.6	0.741	448.6	0.857				448.6	0.458	448.6	0.685	448.6	0.67	448.6	0.721	448.6	0.759
448.8	0.601	448.8	0.606	448.8	0.689	448.8	0.738	448.8	0.853				448.8	0.457	448.8	0.682	448.8	0.666	448.8	0.717	448.8	0.754
449	0.598	449	0.604	449	0.686	449	0.734	449	0.849				449	0.455	449	0.679	449	0.663	449	0.713	449	0.75
449.2	0.595	449.2	0.601	449.2	0.683	449.2	0.731	449.2	0.845				449.2	0.454	449.2	0.675	449.2	0.659	449.2	0.709	449.2	0.745
449.4	0.592	449.4	0.598	449.4	0.679	449.4	0.727	449.4	0.841				449.4	0.452	449.4	0.672	449.4	0.656	449.4	0.705	449.4	0.741
449.6	0.59	449.6	0.596	449.6	0.676	449.6	0.723	449.6	0.837				449.6	0.45	449.6	0.669	449.6	0.652	449.6	0.701	449.6	0.736
449.8	0.587	449.8	0.593	449.8	0.672	449.8	0.72	449.8	0.833				449.8	0.448	449.8	0.665	449.8	0.648	449.8	0.697	449.8	0.732
450	0.584	450	0.59	450	0.669	450	0.716	450	0.829				450	0.446	450	0.662	450	0.644	450	0.693	450	0.727
450.2	0.581	450.2	0.587	450.2	0.666	450.2	0.713	450.2	0.825				450.2	0.445	450.2	0.659	450.2	0.641	450.2	0.689	450.2	0.723
450.4	0.578	450.4	0.584	450.4	0.662	450.4	0.709	450.4	0.821				450.4	0.443	450.4	0.656	450.4	0.637	450.4	0.684	450.4	0.718
450.6	0.575	450.6	0.582	450.6	0.659	450.6	0.705	450.6	0.817				450.6	0.441	450.6	0.652	450.6	0.634	450.6	0.68	450.6	0.714
450.8	0.572	450.8	0.579	450.8	0.656	450.8	0.702	450.8	0.813				450.8	0.439	450.8	0.649	450.8	0.63	450.8	0.676	450.8	0.71
451	0.569	451	0.576	451	0.653	451	0.698	451	0.809				451	0.438	451	0.646	451	0.626	451	0.672	451	0.705
451.2	0.567	451.2	0.574	451.2	0.65	451.2	0.695	451.2	0.805				451.2	0.436	451.2	0.643	451.2	0.623	451.2	0.669	451.2	0.701
451.4	0.564	451.4	0.571	451.4	0.647	451.4	0.692	451.4	0.801				451.4	0.434	451.4	0.64	451.4	0.62	451.4	0.665	451.4	0.697
451.6	0.561	451.6	0.568	451.6	0.644	451.6	0.688	451.6	0.797				451.6	0.432	451.6	0.637	451.6	0.616	451.6	0.661	451.6	0.693
451.8	0.559	451.8	0.565	451.8	0.64	451.8	0.685	451.8	0.793				451.8	0.431	451.8	0.634	451.8	0.613	451.8	0.658	451.8	0.689
452	0.556	452	0.562	452	0.637	452	0.681	452	0.789				452	0.429	452	0.631	452	0.609	452	0.654	452	0.684
452.2	0.553	452.2	0.56	452.2	0.633	452.2	0.678	452.2	0.785				452.2	0.428	452.2	0.628	452.2	0.606	452.2	0.65	452.2	0.68
452.4	0.55	452.4	0.557	452.4	0.63	452.4	0.674	452.4	0.781				452.4	0.426	452.4	0.625	452.4	0.603	452.4	0.646	452.4	0.676
452.6	0.547	452.6	0.554	452.6	0.627	452.6	0.67	452.6	0.776				452.6	0.425	452.6	0.621	452.6	0.599	452.6	0.642	452.6	0.672
452.8	0.544	452.8	0.552	452.8	0.624	452.8	0.667	452.8	0.773				452.8	0.423	452.8	0.618	452.8	0.596	452.8	0.639	452.8	0.668
453	0.541	453	0.549	453	0.62	453	0.663	453	0.768				453	0.421	453	0.615	453	0.593	453	0.634	453	0.663
453.2	0.539	453.2	0.546	453.2	0.617	453.2	0.66	453.2	0.764				453.2	0.419	453.2	0.612	453.2	0.589	453.2	0.63	453.2	0.659
453.4	0.536	453.4	0.543	453.4	0.614	453.4	0.656	453.4	0.76				453.4	0.418	453.4	0.609	453.4	0.586	453.4	0.627	453.4	0.655
453.6	0.534	453.6	0.54	453.6	0.611	453.6	0.653	453.6	0.756				453.6	0.416	453.6	0.606	453.6	0.582	453.6	0.623	453.6	0.651
453.8	0.531	453.8	0.538	453.8	0.609	453.8	0.65	453.8	0.753				453.8	0.415	453.8	0.604	453.8	0.579	453.8	0.62	453.8	0.648
454	0.528	454	0.536	454	0.606	454	0.647	454	0.749				454	0.414	454	0.601	454	0.576	454	0.616	454	0.644
454.2	0.526	454.2	0.533	454.2	0.603	454.2	0.644	454.2	0.746				454.2	0.412	454.2	0.598	454.2	0.574	454.2	0.613	454.2	0.641
454.4	0.523	454.4	0.531	454.4	0.599	454.4	0.641	454.4	0.742				454.4	0.411	454.4	0.595	454.4	0.571	454.4	0.61	454.4	0.637
454.6	0.521	454.6	0.528	454.6	0.596	454.6	0.638	454.6	0.738				454.6	0.409	454.6	0.593	454.6	0.568	454.6	0.607	454.6	0.634
454.8	0.518	454.8	0.525	454.8	0.593	454.8	0.635	454.8	0.735				454.8	0.407	454.8	0.59	454.8	0.565	454.8	0.604	454.8	0.63
455	0.516	455	0.523	455	0.59	455	0.631	455	0.731				455	0.406	455	0.587	455	0.561	455	0.6	455	0.626
455.2	0.513	455.2	0.52	455.2	0.588	455.2	0.628	455.2	0.727				455.2	0.404	455.2	0.584	455.2	0.558	455.2	0.597	455.2	0.623
455.4	0.51	455.4	0.518	455.4	0.585	455.4	0.625	455.4	0.723				455.4	0.403	455.4	0.581	455.4	0.555	455.4	0.594	455.4	0.619
455.6	0.508	455.6	0.515	455.6	0.582	455.6	0.622	455.6	0.719				455.6	0.401	455.6	0.579	455.6	0.552	455.6	0.59	455.6	0.615
455.8	0.505	455.8	0.513	455.8	0.579	455.8	0.618	455.8	0.715				455.8	0.4	455.8	0.576	455.8	0.549	455.8	0.587	455.8	0.612
456	0.502	456	0.51	456	0.575	456	0.615	456	0.711				456	0.398	456	0.573	456	0.545	456	0.583	456	0.608
456.2	0.5	456.2	0.508	456.2	0.573	456.2	0.612	456.2	0.708				456.2	0.397	456.2	0.57	456.2	0.543	456.2	0.58	456.2	0.605
456.4	0.497	456.4	0.505	456.4	0.57	456.4	0.609	456.4	0.704				456.4	0.395	456.4	0.568	456.4	0.54	456.4	0.577	456.4	0.601
456.6	0.495	456.6	0.503	456.6	0.567	456.6	0.606	456.6	0.701				456.6	0.394	456.6	0.565	456.6	0.537	456.6	0.574	456.6	0.598
456.8	0.492	456.8	0.5	456.8	0.564	456.8	0.603	456.8	0.697				456.8	0.392	456.8	0.563	456.8	0.534	456.8	0.571	456.8	0.594
457	0.49	457	0.498	457	0.561	457	0.6	457	0.693				457	0.391	457	0.56	457	0.531	457	0.567	457	0.591
457.2	0.487	457.2	0.495	457.2	0.559	457.2	0.597	457.2	0.69				457.2	0.39	457.2	0.557	457.2	0.528	457.2	0.564	457.2	0.587
457.4	0.485	457.4	0.493	457.4	0.556	457.4	0.594	457.4	0.686				457.4	0.388	457.4	0.555	457.4	0.525	457.4	0.561	457.4	0.584
457.6	0.482	457.6	0.49	457.6	0.553	457.6	0.591	457.6	0.682				457.6	0.387	457.6	0.552	457.6	0.522	457.6	0.557	457.6	0.581
457.8	0.48	457.8	0.488	457.8	0.55	457.8	0.588	457.8	0.679				457.8	0.385	457.8	0.55	457.8	0.52	457.8	0.555	457.8	0.577
458	0.478	458	0.486	458	0.547	458	0.585	458	0.675				458	0.384	458	0.547	458	0.517	458	0.551	458	0.574
458.2	0.475	458.2	0.483	458.2	0.545	458.2	0.582	458.2	0.672				458.2	0.383	458.2	0.544	458.2	0.514	458.2	0.548	458.2	0.571
458.4	0.473	458.4	0.481	458.4	0.542	458.4	0.579	458.4	0.668				458.4	0.381	458.4	0.542	458.4	0.511	458.4	0.545	458.4	0.568
458.6	0.47	458.6	0.478	458.6	0.539	458.6	0.576	458.6	0.664				458.6	0.38	458.6	0.539	458.6	0.508	458.6	0.542	458.6	0.564
458.8	0.468	458.8	0.476	458.8	0.536	458.8	0.573	458.8	0.661				458.8	0.378	458.8	0.537	458.8	0.506	458.8	0.539	458.8	0.561
459	0.466	459	0.474	459	0.533	459	0.57	459	0.658				459	0.377	459	0.534	459	0.503	459	0.536	459	0.558
459.2	0.463	459.2	0.471	459.2	0.531	459.2	0.567	459.2	0.654				459.2	0.376	459.2	0.532	459.2	0.5	459.2	0.533	459.2	0.555
459.4	0.461	459.4	0.469	459.4	0.528	459.4	0.564	459.4	0.651				459.4	0.374	459.4	0.529	459.4	0.498	459.4	0.53	459.4	0.552
459.6	0.459	459.6	0.467	459.6	0.525	459.6	0.562	459.6	0.648				459.6	0.373	459.6	0.527	459.6	0.495	459.6	0.527	459.6	0.549
459.8	0.457	459.8	0.464	459.8	0.523	459.8	0.559	459.8	0.644				459.8	0.372	459.8	0.525	459.8	0.492	459.8	0.524	459.8	0.545
460	0.454	460	0.462	460	0.52	460	0.556	460	0.641				460	0.37	460	0.522	460	0.49	460	0.521	460	0.542
460.2	0.452	460.2	0.46	460.2	0.517	460.2	0.553	460.2	0.638				460.2	0.369	460.2	0.52	460.2	0.487	460.2	0.518	460.2	0.539
460.4	0.45	460.4	0.457	460.4	0.515	460.4	0.55	460.4	0.634				460.4	0.368	460.4	0.517	460.4	0.484	460.4	0.515	460.4	0.536
460.6	0.447	460.6	0.455	460.6	0.512	460.6	0.548	460.6	0.631				460.6	0.366	460.6	0.515	460.6	0.482	460.6	0.512	460.6	0.533
460.8	0.445	460.8	0.453	460.8	0.509	460.8	0.545	460.8	0.628				460.8	0.365	460.8	0.512	460.8	0.479	460.8	0.509	460.8	0.53
461	0.443	461	0.451	461	0.507	461	0.542	461	0.624				461	0.364	461	0.51	461	0.476	461	0.507	461	0.527
461.2	0.441	461.2	0.449	461.2	0.504	461.2	0.539	461.2	0.621				461.2	0.362	461.2	0.507	461.2	0.474	461.2	0.504	461.2	0.524
461.4	0.439	461.4	0.447	461.4	0.502	461.4	0.536	461.4	0.618				461.4	0.361	461.4	0.505	461.4	0.471	461.4	0.501	461.4	0.521
461.6	0.437	461.6	0.445	461.6	0.499	461.6	0.534	461.6	0.615				461.6	0.36	461.6	0.503	461.6	0.469	461.6	0.499	461.6	0.518
461.8	0.435	461.8	0.443	461.8	0.497	461.8	0.531	461.8	0.612				461.8	0.359	461.8	0.501	461.8	0.467	461.8	0.496	461.8	0.515
462	0.432	462	0.44	462	0.495	462	0.529	462	0.609				462	0.357	462	0.499	462	0.464	462	0.493	462	0.513
462.2	0.43	462.2	0.438	462.2	0.492	462.2	0.526	462.2	0.606				462.2	0.356	462.2	0.497	462.2	0.462	462.2	0.491	462.2	0.51
462.4	0.428	462.4	0.436	462.4	0.49	462.4	0.524	462.4	0.603				462.4	0.355	462.4	0.494	462.4	0.46	462.4	0.488	462.4	0.507
462.6	0.426	462.6	0.434	462.6	0.487	462.6	0.521	462.6	0.6				462.6	0.354	462.6	0.492	462.6	0.458	462.6	0.485	462.6	0.505
462.8	0.424	462.8	0.432	462.8	0.485	462.8	0.518	462.8	0.597				462.8	0.353	462.8	0.49	462.8	0.455	462.8	0.483	462.8	0.502
463	0.422	463	0.43	463	0.482	463	0.516	463	0.594				463	0.352	463	0.488	463	0.453	463	0.48	463	0.499
463.2	0.42	463.2	0.428	463.2	0.48	463.2	0.513	463.2	0.591				463.2	0.35	463.2	0.486	463.2	0.451	463.2	0.478	463.2	0.497
463.4	0.418	463.4	0.426	463.4	0.477	463.4	0.51	463.4	0.588				463.4	0.349	463.4	0.484	463.4	0.449	463.4	0.475	463.4	0.494
463.6	0.416	463.6	0.424	463.6	0.475	463.6	0.508	463.6	0.585				463.6	0.348	463.6	0.482	463.6	0.447	463.6	0.473	463.6	0.491
463.8	0.414	463.8	0.422	463.8	0.473	463.8	0.505	463.8	0.582				463.8	0.347	463.8	0.479	463.8	0.444	463.8	0.471	463.8	0.488
464	0.412	464	0.42	464	0.47	464	0.503	464	0.579				464	0.346	464	0.477	464	0.442	464	0.468	464	0.486
464.2	0.41	464.2	0.418	464.2	0.468	464.2	0.501	464.2	0.576				464.2	0.344	464.2	0.475	464.2	0.44	464.2	0.465	464.2	0.483
464.4	0.408	464.4	0.416	464.4	0.466	464.4	0.498	464.4	0.573				464.4	0.343	464.4	0.473	464.4	0.438	464.4	0.463	464.4	0.481
464.6	0.406	464.6	0.414	464.6	0.464	464.6	0.496	464.6	0.57				464.6	0.342	464.6	0.471	464.6	0.436	464.6	0.461	464.6	0.478
464.8	0.404	464.8	0.412	464.8	0.461	464.8	0.493	464.8	0.568				464.8	0.341	464.8	0.469	464.8	0.433	464.8	0.458	464.8	0.476
465	0.403	465	0.41	465	0.459	465	0.491	465	0.565				465	0.34	465	0.467	465	0.431	465	0.456	465	0.473
465.2	0.401	465.2	0.408	465.2	0.457	465.2	0.489	465.2	0.562				465.2	0.339	465.2	0.465	465.2	0.429	465.2	0.453	465.2	0.471
465.4	0.399	465.4	0.406	465.4	0.454	465.4	0.486	465.4	0.559				465.4	0.338	465.4	0.463	465.4	0.427	465.4	0.451	465.4	0.468
465.6	0.397	465.6	0.405	465.6	0.452	465.6	0.484	465.6	0.556				465.6	0.336	465.6	0.461	465.6	0.425	465.6	0.449	465.6	0.466
465.8	0.395	465.8	0.403	465.8	0.45	465.8	0.481	465.8	0.553				465.8	0.335	465.8	0.459	465.8	0.422	465.8	0.446	465.8	0.463
466	0.393	466	0.401	466	0.448	466	0.479	466	0.551				466	0.334	466	0.456	466	0.42	466	0.444	466	0.46
466.2	0.391	466.2	0.399	466.2	0.446	466.2	0.476	466.2	0.548				466.2	0.333	466.2	0.454	466.2	0.418	466.2	0.441	466.2	0.458
466.4	0.389	466.4	0.397	466.4	0.443	466.4	0.474	466.4	0.545				466.4	0.332	466.4	0.452	466.4	0.416	466.4	0.439	466.4	0.455
466.6	0.387	466.6	0.395	466.6	0.441	466.6	0.472	466.6	0.542				466.6	0.331	466.6	0.451	466.6	0.414	466.6	0.437	466.6	0.453
466.8	0.386	466.8	0.393	466.8	0.439	466.8	0.469	466.8	0.54				466.8	0.33	466.8	0.449	466.8	0.412	466.8	0.435	466.8	0.451
467	0.384	467	0.392	467	0.437	467	0.467	467	0.537				467	0.328	467	0.447	467	0.41	467	0.433	467	0.448
467.2	0.382	467.2	0.39	467.2	0.435	467.2	0.465	467.2	0.534				467.2	0.327	467.2	0.445	467.2	0.408	467.2	0.43	467.2	0.446
467.4	0.38	467.4	0.388	467.4	0.433	467.4	0.463	467.4	0.531				467.4	0.326	467.4	0.443	467.4	0.406	467.4	0.428	467.4	0.444
467.6	0.378	467.6	0.386	467.6	0.431	467.6	0.46	467.6	0.528				467.6	0.325	467.6	0.441	467.6	0.404	467.6	0.426	467.6	0.441
467.8	0.377	467.8	0.385	467.8	0.429	467.8	0.458	467.8	0.526				467.8	0.324	467.8	0.439	467.8	0.402	467.8	0.424	467.8	0.439
468	0.375	468	0.383	468	0.426	468	0.456	468	0.523				468	0.323	468	0.437	468	0.4	468	0.421	468	0.437
468.2	0.373	468.2	0.381	468.2	0.425	468.2	0.454	468.2	0.521				468.2	0.322	468.2	0.435	468.2	0.398	468.2	0.419	468.2	0.434
468.4	0.371	468.4	0.379	468.4	0.422	468.4	0.451	468.4	0.518				468.4	0.321	468.4	0.433	468.4	0.396	468.4	0.417	468.4	0.432
468.6	0.37	468.6	0.378	468.6	0.42	468.6	0.449	468.6	0.515				468.6	0.32	468.6	0.431	468.6	0.394	468.6	0.415	468.6	0.43
468.8	0.368	468.8	0.376	468.8	0.418	468.8	0.447	468.8	0.513				468.8	0.318	468.8	0.429	468.8	0.392	468.8	0.413	468.8	0.427
469	0.366	469	0.374	469	0.416	469	0.445	469	0.51				469	0.317	469	0.427	469	0.39	469	0.41	469	0.425
469.2	0.365	469.2	0.372	469.2	0.414	469.2	0.443	469.2	0.507				469.2	0.316	469.2	0.425	469.2	0.389	469.2	0.408	469.2	0.423
469.4	0.363	469.4	0.37	469.4	0.412	469.4	0.441	469.4	0.505				469.4	0.315	469.4	0.424	469.4	0.387	469.4	0.406	469.4	0.421
469.6	0.361	469.6	0.369	469.6	0.41	469.6	0.439	469.6	0.502				469.6	0.314	469.6	0.422	469.6	0.385	469.6	0.404	469.6	0.419
469.8	0.36	469.8	0.367	469.8	0.409	469.8	0.436	469.8	0.5				469.8	0.313	469.8	0.42	469.8	0.383	469.8	0.402	469.8	0.416
470	0.358	470	0.366	470	0.407	470	0.434	470	0.497				470	0.312	470	0.418	470	0.381	470	0.4	470	0.414
470.2	0.356	470.2	0.364	470.2	0.405	470.2	0.432	470.2	0.494				470.2	0.311	470.2	0.416	470.2	0.379	470.2	0.398	470.2	0.412
470.4	0.355	470.4	0.362	470.4	0.403	470.4	0.43	470.4	0.492				470.4	0.31	470.4	0.415	470.4	0.378	470.4	0.396	470.4	0.41
470.6	0.353	470.6	0.36	470.6	0.401	470.6	0.428	470.6	0.489				470.6	0.309	470.6	0.413	470.6	0.376	470.6	0.394	470.6	0.408
470.8	0.351	470.8	0.359	470.8	0.399	470.8	0.426	470.8	0.487				470.8	0.308	470.8	0.411	470.8	0.374	470.8	0.392	470.8	0.406
471	0.35	471	0.357	471	0.397	471	0.423	471	0.484				471	0.307	471	0.409	471	0.372	471	0.39	471	0.403
471.2	0.348	471.2	0.355	471.2	0.395	471.2	0.422	471.2	0.482				471.2	0.306	471.2	0.407	471.2	0.37	471.2	0.388	471.2	0.401
471.4	0.347	471.4	0.354	471.4	0.393	471.4	0.42	471.4	0.48				471.4	0.305	471.4	0.405	471.4	0.368	471.4	0.386	471.4	0.399
471.6	0.345	471.6	0.352	471.6	0.391	471.6	0.418	471.6	0.477				471.6	0.304	471.6	0.404	471.6	0.367	471.6	0.384	471.6	0.397
471.8	0.344	471.8	0.351	471.8	0.389	471.8	0.416	471.8	0.475				471.8	0.302	471.8	0.402	471.8	0.365	471.8	0.382	471.8	0.395
472	0.342	472	0.35	472	0.387	472	0.414	472	0.473				472	0.301	472	0.4	472	0.363	472	0.38	472	0.393
472.2	0.341	472.2	0.348	472.2	0.386	472.2	0.412	472.2	0.471				472.2	0.301	472.2	0.399	472.2	0.362	472.2	0.379	472.2	0.391
472.4	0.339	472.4	0.347	472.4	0.384	472.4	0.41	472.4	0.468				472.4	0.3	472.4	0.397	472.4	0.36	472.4	0.377	472.4	0.389
472.6	0.338	472.6	0.345	472.6	0.382	472.6	0.408	472.6	0.466				472.6	0.299	472.6	0.395	472.6	0.358	472.6	0.375	472.6	0.388
472.8	0.336	472.8	0.344	472.8	0.381	472.8	0.406	472.8	0.463				472.8	0.297	472.8	0.393	472.8	0.357	472.8	0.373	472.8	0.386
473	0.335	473	0.342	473	0.379	473	0.404	473	0.461				473	0.296	473	0.392	473	0.355	473	0.371	473	0.384
473.2	0.333	473.2	0.341	473.2	0.377	473.2	0.402	473.2	0.459				473.2	0.296	473.2	0.39	473.2	0.353	473.2	0.369	473.2	0.382
473.4	0.332	473.4	0.339	473.4	0.376	473.4	0.4	473.4	0.457				473.4	0.295	473.4	0.388	473.4	0.352	473.4	0.368	473.4	0.38
473.6	0.33	473.6	0.338	473.6	0.374	473.6	0.399	473.6	0.455				473.6	0.294	473.6	0.387	473.6	0.35	473.6	0.366	473.6	0.378
473.8	0.329	473.8	0.336	473.8	0.372	473.8	0.397	473.8	0.452				473.8	0.293	473.8	0.385	473.8	0.349	473.8	0.364	473.8	0.376
474	0.328	474	0.335	474	0.37	474	0.395	474	0.45				474	0.292	474	0.383	474	0.347	474	0.363	474	0.374
474.2	0.326	474.2	0.333	474.2	0.369	474.2	0.393	474.2	0.448				474.2	0.291	474.2	0.382	474.2	0.345	474.2	0.361	474.2	0.372
474.4	0.325	474.4	0.332	474.4	0.367	474.4	0.392	474.4	0.446				474.4	0.29	474.4	0.38	474.4	0.344	474.4	0.359	474.4	0.371
474.6	0.324	474.6	0.331	474.6	0.365	474.6	0.39	474.6	0.444				474.6	0.289	474.6	0.379	474.6	0.342	474.6	0.357	474.6	0.369
474.8	0.322	474.8	0.329	474.8	0.364	474.8	0.388	474.8	0.441				474.8	0.288	474.8	0.377	474.8	0.341	474.8	0.356	474.8	0.367
475	0.321	475	0.328	475	0.362	475	0.386	475	0.439				475	0.287	475	0.375	475	0.339	475	0.354	475	0.365
475.2	0.319	475.2	0.327	475.2	0.361	475.2	0.385	475.2	0.437				475.2	0.286	475.2	0.374	475.2	0.337	475.2	0.352	475.2	0.364
475.4	0.318	475.4	0.325	475.4	0.359	475.4	0.383	475.4	0.435				475.4	0.285	475.4	0.372	475.4	0.336	475.4	0.351	475.4	0.362
475.6	0.317	475.6	0.324	475.6	0.358	475.6	0.381	475.6	0.433				475.6	0.284	475.6	0.371	475.6	0.334	475.6	0.349	475.6	0.36
475.8	0.315	475.8	0.323	475.8	0.356	475.8	0.379	475.8	0.431				475.8	0.283	475.8	0.369	475.8	0.333	475.8	0.348	475.8	0.358
476	0.314	476	0.321	476	0.355	476	0.378	476	0.429				476	0.282	476	0.368	476	0.332	476	0.346	476	0.356
476.2	0.313	476.2	0.32	476.2	0.353	476.2	0.376	476.2	0.427				476.2	0.281	476.2	0.366	476.2	0.33	476.2	0.344	476.2	0.355
476.4	0.312	476.4	0.318	476.4	0.351	476.4	0.375	476.4	0.425				476.4	0.28	476.4	0.364	476.4	0.329	476.4	0.343	476.4	0.353
476.6	0.31	476.6	0.317	476.6	0.35	476.6	0.373	476.6	0.423				476.6	0.279	476.6	0.363	476.6	0.327	476.6	0.341	476.6	0.351
476.8	0.309	476.8	0.316	476.8	0.348	476.8	0.372	476.8	0.421				476.8	0.278	476.8	0.361	476.8	0.326	476.8	0.339	476.8	0.35
477	0.308	477	0.315	477	0.347	477	0.37	477	0.42				477	0.277	477	0.36	477	0.324	477	0.338	477	0.348
477.2	0.306	477.2	0.313	477.2	0.346	477.2	0.368	477.2	0.418				477.2	0.276	477.2	0.359	477.2	0.323	477.2	0.336	477.2	0.347
477.4	0.305	477.4	0.312	477.4	0.344	477.4	0.367	477.4	0.416				477.4	0.275	477.4	0.357	477.4	0.321	477.4	0.335	477.4	0.345
477.6	0.304	477.6	0.311	477.6	0.343	477.6	0.365	477.6	0.414				477.6	0.274	477.6	0.355	477.6	0.32	477.6	0.333	477.6	0.343
477.8	0.303	477.8	0.31	477.8	0.342	477.8	0.363	477.8	0.412				477.8	0.273	477.8	0.354	477.8	0.318	477.8	0.332	477.8	0.342
478	0.302	478	0.309	478	0.34	478	0.362	478	0.41				478	0.272	478	0.352	478	0.317	478	0.33	478	0.34
478.2	0.301	478.2	0.308	478.2	0.339	478.2	0.36	478.2	0.408				478.2	0.271	478.2	0.351	478.2	0.315	478.2	0.329	478.2	0.339
478.4	0.299	478.4	0.306	478.4	0.337	478.4	0.359	478.4	0.406				478.4	0.27	478.4	0.35	478.4	0.314	478.4	0.327	478.4	0.337
478.6	0.298	478.6	0.305	478.6	0.336	478.6	0.358	478.6	0.405				478.6	0.269	478.6	0.348	478.6	0.313	478.6	0.326	478.6	0.335
478.8	0.297	478.8	0.304	478.8	0.334	478.8	0.356	478.8	0.403				478.8	0.269	478.8	0.347	478.8	0.311	478.8	0.324	478.8	0.334
479	0.295	479	0.302	479	0.333	479	0.355	479	0.401				479	0.268	479	0.345	479	0.31	479	0.323	479	0.332
479.2	0.294	479.2	0.301	479.2	0.332	479.2	0.353	479.2	0.399				479.2	0.267	479.2	0.344	479.2	0.309	479.2	0.321	479.2	0.331
479.4	0.293	479.4	0.3	479.4	0.33	479.4	0.352	479.4	0.397				479.4	0.266	479.4	0.343	479.4	0.307	479.4	0.32	479.4	0.329
479.6	0.292	479.6	0.299	479.6	0.329	479.6	0.35	479.6	0.396				479.6	0.265	479.6	0.341	479.6	0.306	479.6	0.318	479.6	0.328
479.8	0.291	479.8	0.298	479.8	0.328	479.8	0.349	479.8	0.394				479.8	0.264	479.8	0.34	479.8	0.305	479.8	0.317	479.8	0.326
480	0.29	480	0.297	480	0.327	480	0.348	480	0.392				480	0.263	480	0.338	480	0.303	480	0.315	480	0.325
480.2	0.289	480.2	0.296	480.2	0.325	480.2	0.346	480.2	0.391				480.2	0.262	480.2	0.337	480.2	0.302	480.2	0.314	480.2	0.323
480.4	0.288	480.4	0.295	480.4	0.324	480.4	0.345	480.4	0.389				480.4	0.262	480.4	0.335	480.4	0.301	480.4	0.313	480.4	0.322
480.6	0.287	480.6	0.294	480.6	0.323	480.6	0.343	480.6	0.387				480.6	0.261	480.6	0.334	480.6	0.3	480.6	0.311	480.6	0.32
480.8	0.286	480.8	0.292	480.8	0.321	480.8	0.342	480.8	0.385				480.8	0.26	480.8	0.333	480.8	0.298	480.8	0.31	480.8	0.319
481	0.284	481	0.291	481	0.32	481	0.34	481	0.384				481	0.259	481	0.332	481	0.297	481	0.308	481	0.318
481.2	0.283	481.2	0.29	481.2	0.319	481.2	0.339	481.2	0.382				481.2	0.258	481.2	0.33	481.2	0.296	481.2	0.307	481.2	0.316
481.4	0.282	481.4	0.289	481.4	0.317	481.4	0.338	481.4	0.38				481.4	0.257	481.4	0.329	481.4	0.294	481.4	0.306	481.4	0.315
481.6	0.281	481.6	0.288	481.6	0.316	481.6	0.336	481.6	0.379				481.6	0.256	481.6	0.328	481.6	0.293	481.6	0.305	481.6	0.314
481.8	0.28	481.8	0.287	481.8	0.315	481.8	0.335	481.8	0.377				481.8	0.255	481.8	0.326	481.8	0.292	481.8	0.303	481.8	0.312
482	0.279	482	0.285	482	0.313	482	0.334	482	0.375				482	0.254	482	0.325	482	0.291	482	0.302	482	0.31
482.2	0.278	482.2	0.284	482.2	0.312	482.2	0.332	482.2	0.374				482.2	0.253	482.2	0.324	482.2	0.289	482.2	0.301	482.2	0.309
482.4	0.276	482.4	0.283	482.4	0.311	482.4	0.331	482.4	0.372				482.4	0.252	482.4	0.322	482.4	0.288	482.4	0.299	482.4	0.307
482.6	0.276	482.6	0.282	482.6	0.31	482.6	0.33	482.6	0.371				482.6	0.252	482.6	0.321	482.6	0.287	482.6	0.298	482.6	0.306
482.8	0.274	482.8	0.281	482.8	0.309	482.8	0.328	482.8	0.369				482.8	0.251	482.8	0.319	482.8	0.285	482.8	0.297	482.8	0.305
483	0.273	483	0.28	483	0.307	483	0.327	483	0.368				483	0.25	483	0.318	483	0.284	483	0.295	483	0.303
483.2	0.272	483.2	0.279	483.2	0.306	483.2	0.325	483.2	0.366				483.2	0.249	483.2	0.316	483.2	0.283	483.2	0.294	483.2	0.302
483.4	0.271	483.4	0.278	483.4	0.305	483.4	0.324	483.4	0.364				483.4	0.248	483.4	0.315	483.4	0.281	483.4	0.292	483.4	0.301
483.6	0.27	483.6	0.277	483.6	0.304	483.6	0.323	483.6	0.363				483.6	0.247	483.6	0.314	483.6	0.28	483.6	0.291	483.6	0.299
483.8	0.269	483.8	0.276	483.8	0.303	483.8	0.322	483.8	0.361				483.8	0.246	483.8	0.313	483.8	0.279	483.8	0.29	483.8	0.298
484	0.268	484	0.275	484	0.302	484	0.32	484	0.36				484	0.245	484	0.311	484	0.278	484	0.288	484	0.297
484.2	0.267	484.2	0.274	484.2	0.301	484.2	0.319	484.2	0.358				484.2	0.245	484.2	0.31	484.2	0.277	484.2	0.287	484.2	0.295
484.4	0.266	484.4	0.273	484.4	0.3	484.4	0.318	484.4	0.357				484.4	0.244	484.4	0.309	484.4	0.276	484.4	0.286	484.4	0.294
484.6	0.265	484.6	0.272	484.6	0.298	484.6	0.317	484.6	0.355				484.6	0.243	484.6	0.308	484.6	0.274	484.6	0.285	484.6	0.293
484.8	0.264	484.8	0.271	484.8	0.297	484.8	0.316	484.8	0.354				484.8	0.242	484.8	0.307	484.8	0.273	484.8	0.284	484.8	0.292
485	0.263	485	0.27	485	0.296	485	0.314	485	0.352				485	0.241	485	0.306	485	0.272	485	0.282	485	0.29
485.2	0.262	485.2	0.269	485.2	0.295	485.2	0.313	485.2	0.351				485.2	0.24	485.2	0.304	485.2	0.271	485.2	0.281	485.2	0.289
485.4	0.261	485.4	0.268	485.4	0.294	485.4	0.312	485.4	0.349				485.4	0.239	485.4	0.303	485.4	0.27	485.4	0.28	485.4	0.288
485.6	0.26	485.6	0.267	485.6	0.292	485.6	0.311	485.6	0.348				485.6	0.238	485.6	0.302	485.6	0.269	485.6	0.278	485.6	0.286
485.8	0.259	485.8	0.266	485.8	0.291	485.8	0.309	485.8	0.346				485.8	0.238	485.8	0.301	485.8	0.267	485.8	0.277	485.8	0.285
486	0.258	486	0.265	486	0.29	486	0.308	486	0.345				486	0.237	486	0.299	486	0.266	486	0.276	486	0.284
486.2	0.257	486.2	0.264	486.2	0.289	486.2	0.307	486.2	0.344				486.2	0.236	486.2	0.298	486.2	0.265	486.2	0.275	486.2	0.282
486.4	0.256	486.4	0.263	486.4	0.288	486.4	0.306	486.4	0.342				486.4	0.235	486.4	0.297	486.4	0.264	486.4	0.274	486.4	0.281
486.6	0.255	486.6	0.262	486.6	0.287	486.6	0.305	486.6	0.341				486.6	0.234	486.6	0.296	486.6	0.263	486.6	0.273	486.6	0.28
486.8	0.254	486.8	0.261	486.8	0.286	486.8	0.304	486.8	0.34				486.8	0.233	486.8	0.294	486.8	0.261	486.8	0.271	486.8	0.279
487	0.253	487	0.26	487	0.285	487	0.303	487	0.339				487	0.233	487	0.294	487	0.26	487	0.27	487	0.277
487.2	0.252	487.2	0.259	487.2	0.284	487.2	0.302	487.2	0.337				487.2	0.232	487.2	0.292	487.2	0.259	487.2	0.269	487.2	0.276
487.4	0.251	487.4	0.258	487.4	0.283	487.4	0.301	487.4	0.336				487.4	0.231	487.4	0.291	487.4	0.258	487.4	0.268	487.4	0.275
487.6	0.25	487.6	0.257	487.6	0.282	487.6	0.3	487.6	0.335				487.6	0.23	487.6	0.29	487.6	0.257	487.6	0.266	487.6	0.274
487.8	0.25	487.8	0.256	487.8	0.281	487.8	0.298	487.8	0.333				487.8	0.229	487.8	0.289	487.8	0.256	487.8	0.265	487.8	0.273
488	0.249	488	0.256	488	0.28	488	0.297	488	0.332				488	0.228	488	0.288	488	0.255	488	0.264	488	0.271
488.2	0.248	488.2	0.255	488.2	0.278	488.2	0.296	488.2	0.33				488.2	0.227	488.2	0.287	488.2	0.254	488.2	0.263	488.2	0.27
488.4	0.247	488.4	0.254	488.4	0.277	488.4	0.295	488.4	0.329				488.4	0.227	488.4	0.285	488.4	0.253	488.4	0.262	488.4	0.269
488.6	0.246	488.6	0.253	488.6	0.276	488.6	0.294	488.6	0.328				488.6	0.226	488.6	0.284	488.6	0.251	488.6	0.261	488.6	0.268
488.8	0.245	488.8	0.251	488.8	0.276	488.8	0.293	488.8	0.327				488.8	0.225	488.8	0.283	488.8	0.25	488.8	0.26	488.8	0.266
489	0.244	489	0.251	489	0.275	489	0.292	489	0.326				489	0.224	489	0.281	489	0.249	489	0.258	489	0.265
489.2	0.243	489.2	0.25	489.2	0.274	489.2	0.291	489.2	0.324				489.2	0.223	489.2	0.28	489.2	0.248	489.2	0.257	489.2	0.264
489.4	0.242	489.4	0.249	489.4	0.273	489.4	0.29	489.4	0.323				489.4	0.222	489.4	0.279	489.4	0.247	489.4	0.256	489.4	0.263
489.6	0.241	489.6	0.248	489.6	0.272	489.6	0.289	489.6	0.322				489.6	0.221	489.6	0.278	489.6	0.246	489.6	0.255	489.6	0.262
489.8	0.241	489.8	0.247	489.8	0.271	489.8	0.288	489.8	0.321				489.8	0.221	489.8	0.277	489.8	0.245	489.8	0.254	489.8	0.261
490	0.24	490	0.246	490	0.27	490	0.287	490	0.32				490	0.22	490	0.276	490	0.243	490	0.253	490	0.259
490.2	0.239	490.2	0.245	490.2	0.269	490.2	0.286	490.2	0.318				490.2	0.219	490.2	0.275	490.2	0.242	490.2	0.252	490.2	0.258
490.4	0.238	490.4	0.244	490.4	0.268	490.4	0.285	490.4	0.317				490.4	0.218	490.4	0.274	490.4	0.241	490.4	0.251	490.4	0.257
490.6	0.237	490.6	0.244	490.6	0.267	490.6	0.284	490.6	0.316				490.6	0.217	490.6	0.273	490.6	0.24	490.6	0.25	490.6	0.256
490.8	0.236	490.8	0.243	490.8	0.266	490.8	0.282	490.8	0.314				490.8	0.216	490.8	0.271	490.8	0.239	490.8	0.249	490.8	0.255
491	0.235	491	0.242	491	0.265	491	0.282	491	0.313				491	0.216	491	0.27	491	0.238	491	0.247	491	0.254
491.2	0.234	491.2	0.241	491.2	0.264	491.2	0.28	491.2	0.312				491.2	0.215	491.2	0.269	491.2	0.237	491.2	0.246	491.2	0.253
491.4	0.233	491.4	0.24	491.4	0.263	491.4	0.279	491.4	0.311				491.4	0.214	491.4	0.268	491.4	0.236	491.4	0.245	491.4	0.252
491.6	0.232	491.6	0.239	491.6	0.262	491.6	0.278	491.6	0.31				491.6	0.213	491.6	0.267	491.6	0.235	491.6	0.244	491.6	0.25
491.8	0.232	491.8	0.238	491.8	0.261	491.8	0.277	491.8	0.309				491.8	0.212	491.8	0.266	491.8	0.234	491.8	0.243	491.8	0.249
492	0.231	492	0.237	492	0.26	492	0.276	492	0.308				492	0.211	492	0.265	492	0.233	492	0.242	492	0.248
492.2	0.23	492.2	0.237	492.2	0.259	492.2	0.275	492.2	0.306				492.2	0.211	492.2	0.264	492.2	0.232	492.2	0.241	492.2	0.247
492.4	0.229	492.4	0.236	492.4	0.258	492.4	0.274	492.4	0.305				492.4	0.21	492.4	0.262	492.4	0.231	492.4	0.24	492.4	0.246
492.6	0.228	492.6	0.235	492.6	0.257	492.6	0.273	492.6	0.304				492.6	0.209	492.6	0.261	492.6	0.23	492.6	0.238	492.6	0.245
492.8	0.227	492.8	0.234	492.8	0.256	492.8	0.272	492.8	0.303				492.8	0.208	492.8	0.26	492.8	0.229	492.8	0.238	492.8	0.244
493	0.227	493	0.233	493	0.255	493	0.271	493	0.302				493	0.207	493	0.259	493	0.228	493	0.236	493	0.242
493.2	0.226	493.2	0.232	493.2	0.254	493.2	0.27	493.2	0.301				493.2	0.207	493.2	0.258	493.2	0.227	493.2	0.236	493.2	0.242
493.4	0.225	493.4	0.231	493.4	0.253	493.4	0.269	493.4	0.3				493.4	0.206	493.4	0.257	493.4	0.226	493.4	0.235	493.4	0.241
493.6	0.224	493.6	0.23	493.6	0.252	493.6	0.268	493.6	0.298				493.6	0.205	493.6	0.256	493.6	0.225	493.6	0.234	493.6	0.24
493.8	0.223	493.8	0.23	493.8	0.251	493.8	0.267	493.8	0.297				493.8	0.205	493.8	0.255	493.8	0.224	493.8	0.233	493.8	0.239
494	0.222	494	0.229	494	0.25	494	0.266	494	0.296				494	0.204	494	0.254	494	0.223	494	0.231	494	0.238
494.2	0.221	494.2	0.228	494.2	0.25	494.2	0.265	494.2	0.295				494.2	0.203	494.2	0.253	494.2	0.222	494.2	0.23	494.2	0.237
494.4	0.22	494.4	0.227	494.4	0.249	494.4	0.264	494.4	0.294				494.4	0.202	494.4	0.252	494.4	0.221	494.4	0.23	494.4	0.235
494.6	0.22	494.6	0.226	494.6	0.248	494.6	0.263	494.6	0.293				494.6	0.201	494.6	0.251	494.6	0.22	494.6	0.229	494.6	0.235
494.8	0.219	494.8	0.226	494.8	0.247	494.8	0.262	494.8	0.292				494.8	0.201	494.8	0.25	494.8	0.219	494.8	0.228	494.8	0.233
495	0.218	495	0.225	495	0.246	495	0.261	495	0.291				495	0.2	495	0.249	495	0.218	495	0.227	495	0.232
495.2	0.217	495.2	0.224	495.2	0.245	495.2	0.261	495.2	0.29				495.2	0.199	495.2	0.248	495.2	0.217	495.2	0.226	495.2	0.232
495.4	0.216	495.4	0.223	495.4	0.244	495.4	0.26	495.4	0.289				495.4	0.199	495.4	0.247	495.4	0.216	495.4	0.225	495.4	0.23
495.6	0.215	495.6	0.222	495.6	0.243	495.6	0.259	495.6	0.287				495.6	0.198	495.6	0.246	495.6	0.215	495.6	0.224	495.6	0.229
495.8	0.215	495.8	0.221	495.8	0.242	495.8	0.258	495.8	0.286				495.8	0.197	495.8	0.245	495.8	0.214	495.8	0.223	495.8	0.228
496	0.214	496	0.221	496	0.241	496	0.257	496	0.285				496	0.196	496	0.243	496	0.213	496	0.222	496	0.227
496.2	0.213	496.2	0.22	496.2	0.24	496.2	0.256	496.2	0.284				496.2	0.195	496.2	0.243	496.2	0.212	496.2	0.221	496.2	0.226
496.4	0.213	496.4	0.219	496.4	0.24	496.4	0.255	496.4	0.283				496.4	0.194	496.4	0.242	496.4	0.211	496.4	0.22	496.4	0.225
496.6	0.212	496.6	0.218	496.6	0.239	496.6	0.254	496.6	0.282				496.6	0.194	496.6	0.24	496.6	0.21	496.6	0.219	496.6	0.224
496.8	0.211	496.8	0.218	496.8	0.238	496.8	0.253	496.8	0.281				496.8	0.193	496.8	0.239	496.8	0.209	496.8	0.218	496.8	0.223
497	0.21	497	0.217	497	0.238	497	0.252	497	0.28				497	0.192	497	0.238	497	0.208	497	0.217	497	0.223
497.2	0.209	497.2	0.216	497.2	0.237	497.2	0.252	497.2	0.28				497.2	0.191	497.2	0.237	497.2	0.208	497.2	0.216	497.2	0.221
497.4	0.209	497.4	0.215	497.4	0.236	497.4	0.251	497.4	0.278				497.4	0.191	497.4	0.236	497.4	0.207	497.4	0.215	497.4	0.22
497.6	0.208	497.6	0.215	497.6	0.235	497.6	0.25	497.6	0.277				497.6	0.19	497.6	0.235	497.6	0.206	497.6	0.214	497.6	0.219
497.8	0.207	497.8	0.214	497.8	0.234	497.8	0.249	497.8	0.276				497.8	0.189	497.8	0.235	497.8	0.205	497.8	0.213	497.8	0.218
498	0.206	498	0.213	498	0.233	498	0.248	498	0.275				498	0.189	498	0.234	498	0.204	498	0.212	498	0.218
498.2	0.206	498.2	0.212	498.2	0.232	498.2	0.247	498.2	0.274				498.2	0.188	498.2	0.233	498.2	0.203	498.2	0.211	498.2	0.217
498.4	0.205	498.4	0.211	498.4	0.231	498.4	0.246	498.4	0.273				498.4	0.187	498.4	0.232	498.4	0.202	498.4	0.21	498.4	0.216
498.6	0.204	498.6	0.21	498.6	0.23	498.6	0.245	498.6	0.272				498.6	0.186	498.6	0.231	498.6	0.201	498.6	0.209	498.6	0.215
498.8	0.203	498.8	0.21	498.8	0.229	498.8	0.244	498.8	0.271				498.8	0.186	498.8	0.23	498.8	0.2	498.8	0.209	498.8	0.214
499	0.202	499	0.209	499	0.228	499	0.243	499	0.27				499	0.185	499	0.229	499	0.2	499	0.208	499	0.213
499.2	0.202	499.2	0.208	499.2	0.227	499.2	0.243	499.2	0.269				499.2	0.184	499.2	0.228	499.2	0.199	499.2	0.207	499.2	0.212
499.4	0.201	499.4	0.208	499.4	0.227	499.4	0.242	499.4	0.268				499.4	0.184	499.4	0.227	499.4	0.198	499.4	0.206	499.4	0.211
499.6	0.2	499.6	0.207	499.6	0.226	499.6	0.241	499.6	0.267				499.6	0.183	499.6	0.226	499.6	0.197	499.6	0.205	499.6	0.21
499.8	0.2	499.8	0.206	499.8	0.225	499.8	0.24	499.8	0.267				499.8	0.182	499.8	0.225	499.8	0.196	499.8	0.205	499.8	0.209
500	0.199	500	0.205	500	0.224	500	0.239	500	0.265				500	0.182	500	0.224	500	0.196	500	0.204	500	0.208
500.2	0.198	500.2	0.205	500.2	0.224	500.2	0.238	500.2	0.265				500.2	0.181	500.2	0.223	500.2	0.195	500.2	0.203	500.2	0.208
500.4	0.197	500.4	0.204	500.4	0.223	500.4	0.237	500.4	0.264				500.4	0.18	500.4	0.222	500.4	0.194	500.4	0.202	500.4	0.207
500.6	0.196	500.6	0.203	500.6	0.222	500.6	0.237	500.6	0.263				500.6	0.179	500.6	0.221	500.6	0.193	500.6	0.201	500.6	0.206
500.8	0.196	500.8	0.203	500.8	0.221	500.8	0.236	500.8	0.262				500.8	0.179	500.8	0.22	500.8	0.192	500.8	0.2	500.8	0.205
501	0.195	501	0.202	501	0.22	501	0.235	501	0.261				501	0.178	501	0.22	501	0.191	501	0.199	501	0.204
501.2	0.194	501.2	0.201	501.2	0.22	501.2	0.234	501.2	0.26				501.2	0.177	501.2	0.219	501.2	0.19	501.2	0.199	501.2	0.203
501.4	0.194	501.4	0.2	501.4	0.219	501.4	0.233	501.4	0.259				501.4	0.177	501.4	0.218	501.4	0.189	501.4	0.198	501.4	0.202
501.6	0.193	501.6	0.199	501.6	0.218	501.6	0.232	501.6	0.258				501.6	0.176	501.6	0.217	501.6	0.189	501.6	0.197	501.6	0.201
501.8	0.193	501.8	0.199	501.8	0.217	501.8	0.232	501.8	0.257				501.8	0.175	501.8	0.216	501.8	0.188	501.8	0.196	501.8	0.2
502	0.192	502	0.198	502	0.217	502	0.231	502	0.257				502	0.175	502	0.215	502	0.187	502	0.195	502	0.2
502.2	0.191	502.2	0.197	502.2	0.216	502.2	0.23	502.2	0.256				502.2	0.174	502.2	0.214	502.2	0.186	502.2	0.194	502.2	0.199
502.4	0.19	502.4	0.197	502.4	0.215	502.4	0.229	502.4	0.255				502.4	0.173	502.4	0.214	502.4	0.186	502.4	0.194	502.4	0.198
502.6	0.19	502.6	0.196	502.6	0.214	502.6	0.229	502.6	0.254				502.6	0.173	502.6	0.213	502.6	0.185	502.6	0.193	502.6	0.197
502.8	0.189	502.8	0.195	502.8	0.214	502.8	0.228	502.8	0.253				502.8	0.172	502.8	0.212	502.8	0.184	502.8	0.192	502.8	0.196
503	0.188	503	0.195	503	0.213	503	0.227	503	0.252				503	0.171	503	0.211	503	0.183	503	0.191	503	0.196
503.2	0.188	503.2	0.194	503.2	0.212	503.2	0.226	503.2	0.251				503.2	0.171	503.2	0.21	503.2	0.182	503.2	0.191	503.2	0.195
503.4	0.187	503.4	0.193	503.4	0.211	503.4	0.225	503.4	0.25				503.4	0.17	503.4	0.209	503.4	0.182	503.4	0.19	503.4	0.194
503.6	0.186	503.6	0.193	503.6	0.21	503.6	0.225	503.6	0.249				503.6	0.169	503.6	0.208	503.6	0.181	503.6	0.189	503.6	0.193
503.8	0.185	503.8	0.192	503.8	0.209	503.8	0.224	503.8	0.249				503.8	0.169	503.8	0.208	503.8	0.18	503.8	0.188	503.8	0.192
504	0.185	504	0.191	504	0.209	504	0.223	504	0.248				504	0.168	504	0.207	504	0.179	504	0.187	504	0.191
504.2	0.184	504.2	0.19	504.2	0.208	504.2	0.222	504.2	0.247				504.2	0.168	504.2	0.206	504.2	0.179	504.2	0.186	504.2	0.191
504.4	0.183	504.4	0.19	504.4	0.207	504.4	0.221	504.4	0.246				504.4	0.167	504.4	0.205	504.4	0.178	504.4	0.185	504.4	0.19
504.6	0.183	504.6	0.189	504.6	0.206	504.6	0.22	504.6	0.245				504.6	0.166	504.6	0.204	504.6	0.177	504.6	0.185	504.6	0.189
504.8	0.182	504.8	0.188	504.8	0.205	504.8	0.219	504.8	0.244				504.8	0.166	504.8	0.203	504.8	0.176	504.8	0.184	504.8	0.188
505	0.181	505	0.188	505	0.205	505	0.219	505	0.243				505	0.165	505	0.202	505	0.175	505	0.183	505	0.187
505.2	0.181	505.2	0.187	505.2	0.204	505.2	0.218	505.2	0.243				505.2	0.164	505.2	0.201	505.2	0.175	505.2	0.182	505.2	0.187
505.4	0.18	505.4	0.186	505.4	0.203	505.4	0.217	505.4	0.242				505.4	0.164	505.4	0.2	505.4	0.174	505.4	0.182	505.4	0.186
505.6	0.179	505.6	0.186	505.6	0.203	505.6	0.217	505.6	0.241				505.6	0.163	505.6	0.199	505.6	0.173	505.6	0.181	505.6	0.185
505.8	0.179	505.8	0.185	505.8	0.202	505.8	0.216	505.8	0.24				505.8	0.162	505.8	0.199	505.8	0.172	505.8	0.18	505.8	0.184
506	0.178	506	0.184	506	0.201	506	0.215	506	0.239				506	0.162	506	0.198	506	0.172	506	0.179	506	0.183
506.2	0.177	506.2	0.184	506.2	0.2	506.2	0.214	506.2	0.238				506.2	0.161	506.2	0.197	506.2	0.171	506.2	0.179	506.2	0.183
506.4	0.177	506.4	0.183	506.4	0.2	506.4	0.213	506.4	0.238				506.4	0.16	506.4	0.196	506.4	0.17	506.4	0.178	506.4	0.182
506.6	0.176	506.6	0.182	506.6	0.199	506.6	0.213	506.6	0.237				506.6	0.16	506.6	0.195	506.6	0.169	506.6	0.177	506.6	0.181
506.8	0.175	506.8	0.181	506.8	0.198	506.8	0.212	506.8	0.236				506.8	0.159	506.8	0.194	506.8	0.169	506.8	0.176	506.8	0.18
507	0.175	507	0.181	507	0.197	507	0.211	507	0.235				507	0.158	507	0.193	507	0.168	507	0.175	507	0.179
507.2	0.174	507.2	0.18	507.2	0.197	507.2	0.21	507.2	0.234				507.2	0.158	507.2	0.193	507.2	0.167	507.2	0.175	507.2	0.179
507.4	0.173	507.4	0.18	507.4	0.196	507.4	0.21	507.4	0.233				507.4	0.157	507.4	0.192	507.4	0.167	507.4	0.174	507.4	0.178
507.6	0.173	507.6	0.179	507.6	0.195	507.6	0.209	507.6	0.232				507.6	0.157	507.6	0.191	507.6	0.166	507.6	0.173	507.6	0.177
507.8	0.172	507.8	0.178	507.8	0.194	507.8	0.208	507.8	0.232				507.8	0.156	507.8	0.19	507.8	0.165	507.8	0.172	507.8	0.176
508	0.171	508	0.177	508	0.194	508	0.207	508	0.231				508	0.156	508	0.189	508	0.165	508	0.172	508	0.176
508.2	0.171	508.2	0.177	508.2	0.193	508.2	0.207	508.2	0.23				508.2	0.155	508.2	0.189	508.2	0.164	508.2	0.171	508.2	0.175
508.4	0.17	508.4	0.176	508.4	0.192	508.4	0.206	508.4	0.229				508.4	0.154	508.4	0.188	508.4	0.163	508.4	0.17	508.4	0.174
508.6	0.169	508.6	0.175	508.6	0.191	508.6	0.205	508.6	0.228				508.6	0.154	508.6	0.187	508.6	0.163	508.6	0.17	508.6	0.174
508.8	0.168	508.8	0.175	508.8	0.19	508.8	0.204	508.8	0.227				508.8	0.153	508.8	0.186	508.8	0.162	508.8	0.169	508.8	0.173
509	0.168	509	0.174	509	0.19	509	0.203	509	0.226				509	0.152	509	0.185	509	0.161	509	0.168	509	0.172
509.2	0.167	509.2	0.173	509.2	0.189	509.2	0.202	509.2	0.225				509.2	0.152	509.2	0.184	509.2	0.16	509.2	0.167	509.2	0.171
509.4	0.167	509.4	0.173	509.4	0.188	509.4	0.202	509.4	0.224				509.4	0.151	509.4	0.184	509.4	0.16	509.4	0.167	509.4	0.171
509.6	0.166	509.6	0.172	509.6	0.187	509.6	0.201	509.6	0.224				509.6	0.151	509.6	0.183	509.6	0.159	509.6	0.166	509.6	0.17
509.8	0.165	509.8	0.171	509.8	0.187	509.8	0.2	509.8	0.223				509.8	0.15	509.8	0.182	509.8	0.158	509.8	0.165	509.8	0.169
510	0.165	510	0.171	510	0.186	510	0.199	510	0.222				510	0.149	510	0.181	510	0.157	510	0.164	510	0.168
510.2	0.164	510.2	0.17	510.2	0.185	510.2	0.199	510.2	0.221				510.2	0.149	510.2	0.18	510.2	0.157	510.2	0.164	510.2	0.168
510.4	0.163	510.4	0.169	510.4	0.185	510.4	0.198	510.4	0.22				510.4	0.148	510.4	0.18	510.4	0.156	510.4	0.163	510.4	0.167
510.6	0.163	510.6	0.169	510.6	0.184	510.6	0.197	510.6	0.22				510.6	0.147	510.6	0.179	510.6	0.155	510.6	0.162	510.6	0.166
510.8	0.162	510.8	0.168	510.8	0.183	510.8	0.197	510.8	0.219				510.8	0.147	510.8	0.178	510.8	0.155	510.8	0.162	510.8	0.166
511	0.161	511	0.167	511	0.182	511	0.196	511	0.218				511	0.146	511	0.177	511	0.154	511	0.161	511	0.165
511.2	0.161	511.2	0.167	511.2	0.182	511.2	0.195	511.2	0.217				511.2	0.146	511.2	0.176	511.2	0.154	511.2	0.16	511.2	0.164
511.4	0.16	511.4	0.166	511.4	0.181	511.4	0.194	511.4	0.216				511.4	0.145	511.4	0.176	511.4	0.153	511.4	0.159	511.4	0.163
511.6	0.16	511.6	0.165	511.6	0.18	511.6	0.194	511.6	0.215				511.6	0.145	511.6	0.175	511.6	0.152	511.6	0.159	511.6	0.163
511.8	0.159	511.8	0.165	511.8	0.179	511.8	0.193	511.8	0.215				511.8	0.144	511.8	0.174	511.8	0.151	511.8	0.158	511.8	0.162
512	0.158	512	0.164	512	0.179	512	0.192	512	0.214				512	0.144	512	0.173	512	0.151	512	0.157	512	0.161
512.2	0.158	512.2	0.163	512.2	0.178	512.2	0.191	512.2	0.213				512.2	0.143	512.2	0.173	512.2	0.15	512.2	0.157	512.2	0.161
512.4	0.157	512.4	0.163	512.4	0.177	512.4	0.191	512.4	0.212				512.4	0.142	512.4	0.172	512.4	0.149	512.4	0.156	512.4	0.16
512.6	0.156	512.6	0.162	512.6	0.177	512.6	0.19	512.6	0.211				512.6	0.142	512.6	0.171	512.6	0.149	512.6	0.155	512.6	0.159
512.8	0.156	512.8	0.162	512.8	0.176	512.8	0.189	512.8	0.211				512.8	0.141	512.8	0.17	512.8	0.148	512.8	0.155	512.8	0.159
513	0.155	513	0.161	513	0.175	513	0.189	513	0.21				513	0.14	513	0.169	513	0.147	513	0.154	513	0.158
513.2	0.155	513.2	0.161	513.2	0.175	513.2	0.188	513.2	0.209				513.2	0.14	513.2	0.168	513.2	0.147	513.2	0.153	513.2	0.157
513.4	0.154	513.4	0.16	513.4	0.174	513.4	0.187	513.4	0.208				513.4	0.139	513.4	0.168	513.4	0.146	513.4	0.152	513.4	0.156
513.6	0.153	513.6	0.159	513.6	0.173	513.6	0.186	513.6	0.208				513.6	0.139	513.6	0.167	513.6	0.145	513.6	0.152	513.6	0.156
513.8	0.153	513.8	0.159	513.8	0.172	513.8	0.186	513.8	0.207				513.8	0.138	513.8	0.166	513.8	0.145	513.8	0.151	513.8	0.155
514	0.152	514	0.158	514	0.172	514	0.185	514	0.206				514	0.137	514	0.165	514	0.144	514	0.15	514	0.154
514.2	0.152	514.2	0.157	514.2	0.171	514.2	0.184	514.2	0.205				514.2	0.137	514.2	0.165	514.2	0.143	514.2	0.15	514.2	0.154
514.4	0.151	514.4	0.157	514.4	0.17	514.4	0.183	514.4	0.204				514.4	0.136	514.4	0.164	514.4	0.143	514.4	0.149	514.4	0.153
514.6	0.15	514.6	0.156	514.6	0.17	514.6	0.183	514.6	0.203				514.6	0.136	514.6	0.164	514.6	0.142	514.6	0.149	514.6	0.153
514.8	0.15	514.8	0.155	514.8	0.169	514.8	0.182	514.8	0.203				514.8	0.135	514.8	0.163	514.8	0.142	514.8	0.148	514.8	0.152
515	0.149	515	0.155	515	0.168	515	0.181	515	0.202				515	0.135	515	0.162	515	0.141	515	0.147	515	0.151
515.2	0.149	515.2	0.154	515.2	0.167	515.2	0.181	515.2	0.201				515.2	0.134	515.2	0.162	515.2	0.141	515.2	0.147	515.2	0.151
515.4	0.148	515.4	0.154	515.4	0.167	515.4	0.18	515.4	0.201				515.4	0.134	515.4	0.161	515.4	0.14	515.4	0.146	515.4	0.15
515.6	0.147	515.6	0.153	515.6	0.166	515.6	0.179	515.6	0.2				515.6	0.133	515.6	0.16	515.6	0.139	515.6	0.145	515.6	0.149
515.8	0.147	515.8	0.152	515.8	0.166	515.8	0.179	515.8	0.199				515.8	0.132	515.8	0.159	515.8	0.139	515.8	0.145	515.8	0.149
516	0.146	516	0.152	516	0.165	516	0.178	516	0.198				516	0.132	516	0.159	516	0.138	516	0.144	516	0.148
516.2	0.146	516.2	0.151	516.2	0.164	516.2	0.177	516.2	0.197				516.2	0.131	516.2	0.158	516.2	0.138	516.2	0.143	516.2	0.148
516.4	0.145	516.4	0.151	516.4	0.163	516.4	0.176	516.4	0.197				516.4	0.131	516.4	0.157	516.4	0.137	516.4	0.143	516.4	0.147
516.6	0.144	516.6	0.15	516.6	0.163	516.6	0.176	516.6	0.196				516.6	0.13	516.6	0.156	516.6	0.136	516.6	0.142	516.6	0.146
516.8	0.144	516.8	0.149	516.8	0.162	516.8	0.175	516.8	0.195				516.8	0.13	516.8	0.156	516.8	0.136	516.8	0.141	516.8	0.146
517	0.143	517	0.149	517	0.161	517	0.174	517	0.194				517	0.129	517	0.155	517	0.135	517	0.141	517	0.145
517.2	0.143	517.2	0.148	517.2	0.161	517.2	0.174	517.2	0.194				517.2	0.129	517.2	0.154	517.2	0.134	517.2	0.14	517.2	0.145
517.4	0.142	517.4	0.148	517.4	0.16	517.4	0.173	517.4	0.193				517.4	0.128	517.4	0.154	517.4	0.134	517.4	0.14	517.4	0.144
517.6	0.142	517.6	0.147	517.6	0.16	517.6	0.172	517.6	0.192				517.6	0.128	517.6	0.153	517.6	0.133	517.6	0.139	517.6	0.143
517.8	0.141	517.8	0.146	517.8	0.159	517.8	0.172	517.8	0.191				517.8	0.127	517.8	0.152	517.8	0.133	517.8	0.138	517.8	0.143
518	0.14	518	0.146	518	0.158	518	0.171	518	0.191				518	0.127	518	0.152	518	0.132	518	0.138	518	0.142
518.2	0.14	518.2	0.145	518.2	0.158	518.2	0.17	518.2	0.19				518.2	0.126	518.2	0.151	518.2	0.132	518.2	0.137	518.2	0.141
518.4	0.139	518.4	0.145	518.4	0.157	518.4	0.17	518.4	0.189				518.4	0.125	518.4	0.15	518.4	0.131	518.4	0.136	518.4	0.141
518.6	0.139	518.6	0.144	518.6	0.156	518.6	0.169	518.6	0.188				518.6	0.125	518.6	0.15	518.6	0.13	518.6	0.136	518.6	0.14
518.8	0.138	518.8	0.143	518.8	0.155	518.8	0.168	518.8	0.188				518.8	0.125	518.8	0.149	518.8	0.13	518.8	0.135	518.8	0.14
519	0.137	519	0.143	519	0.155	519	0.168	519	0.187				519	0.124	519	0.148	519	0.129	519	0.135	519	0.139
519.2	0.137	519.2	0.142	519.2	0.154	519.2	0.167	519.2	0.186				519.2	0.123	519.2	0.148	519.2	0.129	519.2	0.134	519.2	0.139
519.4	0.136	519.4	0.142	519.4	0.154	519.4	0.166	519.4	0.185				519.4	0.123	519.4	0.147	519.4	0.128	519.4	0.134	519.4	0.138
519.6	0.136	519.6	0.141	519.6	0.153	519.6	0.165	519.6	0.185				519.6	0.122	519.6	0.146	519.6	0.128	519.6	0.133	519.6	0.138
519.8	0.135	519.8	0.14	519.8	0.152	519.8	0.165	519.8	0.184				519.8	0.122	519.8	0.146	519.8	0.127	519.8	0.133	519.8	0.137
520	0.135	520	0.14	520	0.151	520	0.164	520	0.183				520	0.122	520	0.145	520	0.127	520	0.132	520	0.137
520.2	0.134	520.2	0.139	520.2	0.151	520.2	0.163	520.2	0.182				520.2	0.121	520.2	0.144	520.2	0.126	520.2	0.131	520.2	0.136
520.4	0.133	520.4	0.139	520.4	0.15	520.4	0.163	520.4	0.182				520.4	0.121	520.4	0.144	520.4	0.125	520.4	0.131	520.4	0.135
520.6	0.133	520.6	0.138	520.6	0.15	520.6	0.162	520.6	0.181				520.6	0.12	520.6	0.143	520.6	0.125	520.6	0.13	520.6	0.135
520.8	0.132	520.8	0.138	520.8	0.149	520.8	0.162	520.8	0.18				520.8	0.12	520.8	0.143	520.8	0.124	520.8	0.13	520.8	0.134
521	0.132	521	0.137	521	0.148	521	0.161	521	0.18				521	0.119	521	0.142	521	0.124	521	0.129	521	0.134
521.2	0.131	521.2	0.137	521.2	0.148	521.2	0.16	521.2	0.179				521.2	0.119	521.2	0.141	521.2	0.123	521.2	0.129	521.2	0.133
521.4	0.131	521.4	0.136	521.4	0.147	521.4	0.16	521.4	0.178				521.4	0.118	521.4	0.141	521.4	0.123	521.4	0.128	521.4	0.133
521.6	0.13	521.6	0.135	521.6	0.147	521.6	0.159	521.6	0.178				521.6	0.118	521.6	0.14	521.6	0.123	521.6	0.128	521.6	0.132
521.8	0.13	521.8	0.135	521.8	0.146	521.8	0.159	521.8	0.177				521.8	0.117	521.8	0.14	521.8	0.122	521.8	0.127	521.8	0.132
522	0.129	522	0.134	522	0.146	522	0.158	522	0.177				522	0.117	522	0.139	522	0.122	522	0.127	522	0.131
522.2	0.129	522.2	0.134	522.2	0.145	522.2	0.157	522.2	0.176				522.2	0.116	522.2	0.138	522.2	0.121	522.2	0.126	522.2	0.131
522.4	0.128	522.4	0.133	522.4	0.144	522.4	0.157	522.4	0.175				522.4	0.115	522.4	0.138	522.4	0.12	522.4	0.125	522.4	0.13
522.6	0.128	522.6	0.133	522.6	0.144	522.6	0.156	522.6	0.174				522.6	0.115	522.6	0.137	522.6	0.12	522.6	0.125	522.6	0.13
522.8	0.127	522.8	0.132	522.8	0.143	522.8	0.155	522.8	0.173				522.8	0.115	522.8	0.137	522.8	0.119	522.8	0.124	522.8	0.129
523	0.126	523	0.132	523	0.142	523	0.154	523	0.173				523	0.114	523	0.136	523	0.119	523	0.124	523	0.129
523.2	0.126	523.2	0.131	523.2	0.142	523.2	0.154	523.2	0.172				523.2	0.114	523.2	0.135	523.2	0.118	523.2	0.123	523.2	0.128
523.4	0.125	523.4	0.13	523.4	0.141	523.4	0.153	523.4	0.171				523.4	0.113	523.4	0.135	523.4	0.118	523.4	0.123	523.4	0.128
523.6	0.125	523.6	0.13	523.6	0.14	523.6	0.153	523.6	0.17				523.6	0.113	523.6	0.134	523.6	0.117	523.6	0.122	523.6	0.127
523.8	0.124	523.8	0.129	523.8	0.14	523.8	0.152	523.8	0.17				523.8	0.112	523.8	0.133	523.8	0.117	523.8	0.122	523.8	0.126
524	0.124	524	0.129	524	0.139	524	0.151	524	0.169				524	0.112	524	0.133	524	0.116	524	0.121	524	0.126
524.2	0.123	524.2	0.128	524.2	0.139	524.2	0.151	524.2	0.168				524.2	0.111	524.2	0.132	524.2	0.116	524.2	0.12	524.2	0.126
524.4	0.123	524.4	0.128	524.4	0.138	524.4	0.15	524.4	0.168				524.4	0.111	524.4	0.132	524.4	0.116	524.4	0.12	524.4	0.125
524.6	0.122	524.6	0.127	524.6	0.137	524.6	0.149	524.6	0.167				524.6	0.11	524.6	0.131	524.6	0.115	524.6	0.12	524.6	0.124
524.8	0.122	524.8	0.127	524.8	0.137	524.8	0.149	524.8	0.167				524.8	0.11	524.8	0.131	524.8	0.115	524.8	0.119	524.8	0.124
525	0.121	525	0.126	525	0.136	525	0.148	525	0.166				525	0.11	525	0.13	525	0.114	525	0.119	525	0.123
525.2	0.121	525.2	0.126	525.2	0.136	525.2	0.148	525.2	0.165				525.2	0.109	525.2	0.13	525.2	0.114	525.2	0.118	525.2	0.123
525.4	0.12	525.4	0.125	525.4	0.135	525.4	0.147	525.4	0.165				525.4	0.109	525.4	0.129	525.4	0.113	525.4	0.117	525.4	0.122
525.6	0.12	525.6	0.125	525.6	0.135	525.6	0.146	525.6	0.164				525.6	0.108	525.6	0.128	525.6	0.113	525.6	0.117	525.6	0.122
525.8	0.119	525.8	0.124	525.8	0.134	525.8	0.146	525.8	0.163				525.8	0.108	525.8	0.128	525.8	0.112	525.8	0.117	525.8	0.122
526	0.118	526	0.123	526	0.133	526	0.145	526	0.163				526	0.108	526	0.127	526	0.112	526	0.116	526	0.121
526.2	0.118	526.2	0.123	526.2	0.133	526.2	0.145	526.2	0.162				526.2	0.107	526.2	0.127	526.2	0.111	526.2	0.116	526.2	0.121
526.4	0.118	526.4	0.123	526.4	0.132	526.4	0.144	526.4	0.161				526.4	0.107	526.4	0.126	526.4	0.111	526.4	0.115	526.4	0.12
526.6	0.117	526.6	0.122	526.6	0.132	526.6	0.144	526.6	0.161				526.6	0.106	526.6	0.126	526.6	0.11	526.6	0.115	526.6	0.12
526.8	0.116	526.8	0.122	526.8	0.131	526.8	0.143	526.8	0.16				526.8	0.106	526.8	0.125	526.8	0.11	526.8	0.114	526.8	0.119
527	0.116	527	0.121	527	0.13	527	0.142	527	0.159				527	0.105	527	0.125	527	0.11	527	0.114	527	0.119
527.2	0.115	527.2	0.12	527.2	0.13	527.2	0.142	527.2	0.158				527.2	0.105	527.2	0.124	527.2	0.109	527.2	0.113	527.2	0.119
527.4	0.115	527.4	0.12	527.4	0.129	527.4	0.141	527.4	0.158				527.4	0.105	527.4	0.124	527.4	0.109	527.4	0.112	527.4	0.118
527.6	0.115	527.6	0.119	527.6	0.129	527.6	0.141	527.6	0.157				527.6	0.104	527.6	0.123	527.6	0.108	527.6	0.112	527.6	0.118
527.8	0.114	527.8	0.119	527.8	0.128	527.8	0.14	527.8	0.157				527.8	0.104	527.8	0.122	527.8	0.108	527.8	0.112	527.8	0.117
528	0.114	528	0.118	528	0.128	528	0.139	528	0.156				528	0.103	528	0.122	528	0.107	528	0.111	528	0.117
528.2	0.113	528.2	0.118	528.2	0.127	528.2	0.139	528.2	0.155				528.2	0.103	528.2	0.122	528.2	0.107	528.2	0.11	528.2	0.116
528.4	0.113	528.4	0.117	528.4	0.127	528.4	0.138	528.4	0.155				528.4	0.102	528.4	0.121	528.4	0.106	528.4	0.11	528.4	0.116
528.6	0.112	528.6	0.117	528.6	0.126	528.6	0.138	528.6	0.154				528.6	0.102	528.6	0.121	528.6	0.106	528.6	0.109	528.6	0.115
528.8	0.112	528.8	0.116	528.8	0.126	528.8	0.137	528.8	0.154				528.8	0.101	528.8	0.12	528.8	0.106	528.8	0.109	528.8	0.115
529	0.111	529	0.116	529	0.125	529	0.137	529	0.153				529	0.101	529	0.119	529	0.105	529	0.109	529	0.114
529.2	0.111	529.2	0.115	529.2	0.125	529.2	0.136	529.2	0.152				529.2	0.101	529.2	0.119	529.2	0.105	529.2	0.108	529.2	0.114
529.4	0.11	529.4	0.115	529.4	0.124	529.4	0.136	529.4	0.152				529.4	0.1	529.4	0.118	529.4	0.104	529.4	0.108	529.4	0.113
529.6	0.11	529.6	0.115	529.6	0.124	529.6	0.135	529.6	0.151				529.6	0.1	529.6	0.118	529.6	0.104	529.6	0.107	529.6	0.113
529.8	0.11	529.8	0.114	529.8	0.123	529.8	0.135	529.8	0.151				529.8	0.1	529.8	0.117	529.8	0.104	529.8	0.107	529.8	0.113
530	0.109	530	0.114	530	0.123	530	0.134	530	0.15				530	0.099	530	0.117	530	0.103	530	0.106	530	0.112
530.2	0.109	530.2	0.113	530.2	0.122	530.2	0.134	530.2	0.149				530.2	0.099	530.2	0.116	530.2	0.103	530.2	0.106	530.2	0.112
530.4	0.108	530.4	0.113	530.4	0.122	530.4	0.133	530.4	0.149				530.4	0.099	530.4	0.116	530.4	0.102	530.4	0.105	530.4	0.112
530.6	0.108	530.6	0.112	530.6	0.121	530.6	0.132	530.6	0.148				530.6	0.098	530.6	0.115	530.6	0.102	530.6	0.105	530.6	0.111
530.8	0.107	530.8	0.112	530.8	0.121	530.8	0.132	530.8	0.148				530.8	0.098	530.8	0.115	530.8	0.101	530.8	0.104	530.8	0.111
531	0.107	531	0.111	531	0.12	531	0.131	531	0.147				531	0.097	531	0.115	531	0.101	531	0.104	531	0.11
531.2	0.106	531.2	0.111	531.2	0.12	531.2	0.131	531.2	0.146				531.2	0.097	531.2	0.114	531.2	0.101	531.2	0.104	531.2	0.11
531.4	0.106	531.4	0.11	531.4	0.119	531.4	0.13	531.4	0.146				531.4	0.097	531.4	0.114	531.4	0.1	531.4	0.103	531.4	0.109
531.6	0.105	531.6	0.11	531.6	0.119	531.6	0.129	531.6	0.145				531.6	0.096	531.6	0.113	531.6	0.1	531.6	0.103	531.6	0.109
531.8	0.105	531.8	0.109	531.8	0.118	531.8	0.129	531.8	0.145				531.8	0.096	531.8	0.113	531.8	0.1	531.8	0.102	531.8	0.109
532	0.105	532	0.109	532	0.118	532	0.128	532	0.144				532	0.095	532	0.112	532	0.1	532	0.102	532	0.108
532.2	0.104	532.2	0.109	532.2	0.117	532.2	0.128	532.2	0.144				532.2	0.095	532.2	0.112	532.2	0.099	532.2	0.102	532.2	0.108
532.4	0.104	532.4	0.108	532.4	0.117	532.4	0.127	532.4	0.143				532.4	0.095	532.4	0.111	532.4	0.099	532.4	0.101	532.4	0.108
532.6	0.103	532.6	0.108	532.6	0.116	532.6	0.127	532.6	0.143				532.6	0.094	532.6	0.111	532.6	0.098	532.6	0.101	532.6	0.107
532.8	0.103	532.8	0.107	532.8	0.116	532.8	0.127	532.8	0.142				532.8	0.094	532.8	0.11	532.8	0.098	532.8	0.1	532.8	0.107
533	0.103	533	0.107	533	0.115	533	0.126	533	0.141				533	0.094	533	0.11	533	0.097	533	0.1	533	0.107
533.2	0.102	533.2	0.107	533.2	0.115	533.2	0.126	533.2	0.141				533.2	0.093	533.2	0.11	533.2	0.097	533.2	0.1	533.2	0.106
533.4	0.102	533.4	0.106	533.4	0.114	533.4	0.125	533.4	0.14				533.4	0.093	533.4	0.109	533.4	0.097	533.4	0.099	533.4	0.106
533.6	0.101	533.6	0.106	533.6	0.114	533.6	0.125	533.6	0.14				533.6	0.092	533.6	0.109	533.6	0.096	533.6	0.099	533.6	0.105
533.8	0.101	533.8	0.105	533.8	0.113	533.8	0.124	533.8	0.139				533.8	0.092	533.8	0.108	533.8	0.096	533.8	0.098	533.8	0.105
534	0.1	534	0.105	534	0.113	534	0.124	534	0.139				534	0.092	534	0.108	534	0.096	534	0.098	534	0.104
534.2	0.1	534.2	0.105	534.2	0.113	534.2	0.123	534.2	0.138				534.2	0.092	534.2	0.108	534.2	0.095	534.2	0.097	534.2	0.104
534.4	0.1	534.4	0.104	534.4	0.112	534.4	0.123	534.4	0.138				534.4	0.091	534.4	0.107	534.4	0.095	534.4	0.097	534.4	0.104
534.6	0.099	534.6	0.103	534.6	0.112	534.6	0.122	534.6	0.137				534.6	0.091	534.6	0.107	534.6	0.095	534.6	0.097	534.6	0.104
534.8	0.099	534.8	0.103	534.8	0.112	534.8	0.122	534.8	0.137				534.8	0.09	534.8	0.107	534.8	0.095	534.8	0.096	534.8	0.103
535	0.098	535	0.102	535	0.111	535	0.121	535	0.136				535	0.09	535	0.106	535	0.094	535	0.096	535	0.103
535.2	0.098	535.2	0.102	535.2	0.11	535.2	0.121	535.2	0.135				535.2	0.09	535.2	0.106	535.2	0.094	535.2	0.096	535.2	0.103
535.4	0.098	535.4	0.102	535.4	0.11	535.4	0.12	535.4	0.135				535.4	0.089	535.4	0.106	535.4	0.094	535.4	0.096	535.4	0.102
535.6	0.097	535.6	0.101	535.6	0.109	535.6	0.119	535.6	0.134				535.6	0.089	535.6	0.105	535.6	0.093	535.6	0.095	535.6	0.102
535.8	0.097	535.8	0.101	535.8	0.109	535.8	0.119	535.8	0.134				535.8	0.089	535.8	0.105	535.8	0.093	535.8	0.095	535.8	0.102
536	0.096	536	0.1	536	0.108	536	0.119	536	0.133				536	0.089	536	0.104	536	0.093	536	0.094	536	0.101
536.2	0.096	536.2	0.1	536.2	0.108	536.2	0.118	536.2	0.133				536.2	0.088	536.2	0.104	536.2	0.092	536.2	0.094	536.2	0.101
536.4	0.095	536.4	0.1	536.4	0.107	536.4	0.117	536.4	0.132				536.4	0.088	536.4	0.104	536.4	0.092	536.4	0.093	536.4	0.101
536.6	0.095	536.6	0.1	536.6	0.107	536.6	0.117	536.6	0.132				536.6	0.088	536.6	0.103	536.6	0.092	536.6	0.093	536.6	0.1
536.8	0.095	536.8	0.099	536.8	0.107	536.8	0.116	536.8	0.131				536.8	0.088	536.8	0.103	536.8	0.091	536.8	0.093	536.8	0.1
537	0.094	537	0.099	537	0.106	537	0.116	537	0.131				537	0.087	537	0.103	537	0.091	537	0.092	537	0.1
537.2	0.094	537.2	0.098	537.2	0.106	537.2	0.116	537.2	0.13				537.2	0.087	537.2	0.102	537.2	0.091	537.2	0.092	537.2	0.099
537.4	0.094	537.4	0.098	537.4	0.106	537.4	0.115	537.4	0.13				537.4	0.086	537.4	0.102	537.4	0.09	537.4	0.092	537.4	0.099
537.6	0.093	537.6	0.097	537.6	0.105	537.6	0.115	537.6	0.129				537.6	0.086	537.6	0.102	537.6	0.09	537.6	0.091	537.6	0.098
537.8	0.093	537.8	0.097	537.8	0.105	537.8	0.114	537.8	0.128				537.8	0.086	537.8	0.101	537.8	0.09	537.8	0.091	537.8	0.098
538	0.092	538	0.096	538	0.104	538	0.114	538	0.128				538	0.085	538	0.101	538	0.089	538	0.091	538	0.098
538.2	0.092	538.2	0.096	538.2	0.104	538.2	0.113	538.2	0.127				538.2	0.085	538.2	0.1	538.2	0.089	538.2	0.09	538.2	0.098
538.4	0.092	538.4	0.096	538.4	0.103	538.4	0.113	538.4	0.127				538.4	0.085	538.4	0.1	538.4	0.089	538.4	0.09	538.4	0.097
538.6	0.091	538.6	0.095	538.6	0.103	538.6	0.112	538.6	0.126				538.6	0.084	538.6	0.099	538.6	0.088	538.6	0.09	538.6	0.097
538.8	0.091	538.8	0.095	538.8	0.102	538.8	0.112	538.8	0.126				538.8	0.084	538.8	0.099	538.8	0.088	538.8	0.089	538.8	0.096
539	0.09	539	0.095	539	0.102	539	0.112	539	0.125				539	0.084	539	0.099	539	0.088	539	0.089	539	0.096
539.2	0.09	539.2	0.094	539.2	0.101	539.2	0.111	539.2	0.125				539.2	0.083	539.2	0.098	539.2	0.087	539.2	0.088	539.2	0.095
539.4	0.089	539.4	0.094	539.4	0.101	539.4	0.11	539.4	0.124				539.4	0.083	539.4	0.098	539.4	0.087	539.4	0.088	539.4	0.095
539.6	0.089	539.6	0.093	539.6	0.101	539.6	0.11	539.6	0.124				539.6	0.083	539.6	0.098	539.6	0.087	539.6	0.088	539.6	0.095
539.8	0.089	539.8	0.093	539.8	0.1	539.8	0.109	539.8	0.123				539.8	0.083	539.8	0.097	539.8	0.086	539.8	0.087	539.8	0.095
540	0.088	540	0.093	540	0.1	540	0.109	540	0.123				540	0.082	540	0.097	540	0.086	540	0.087	540	0.094
540.2	0.088	540.2	0.092	540.2	0.1	540.2	0.109	540.2	0.122				540.2	0.082	540.2	0.097	540.2	0.086	540.2	0.087	540.2	0.094
540.4	0.088	540.4	0.092	540.4	0.099	540.4	0.108	540.4	0.122				540.4	0.081	540.4	0.096	540.4	0.086	540.4	0.086	540.4	0.094
540.6	0.087	540.6	0.091	540.6	0.099	540.6	0.108	540.6	0.121				540.6	0.081	540.6	0.096	540.6	0.085	540.6	0.086	540.6	0.093
540.8	0.087	540.8	0.091	540.8	0.099	540.8	0.107	540.8	0.121				540.8	0.081	540.8	0.096	540.8	0.085	540.8	0.086	540.8	0.093
541	0.086	541	0.09	541	0.098	541	0.107	541	0.12				541	0.08	541	0.096	541	0.085	541	0.085	541	0.093
541.2	0.086	541.2	0.09	541.2	0.097	541.2	0.106	541.2	0.12				541.2	0.08	541.2	0.095	541.2	0.084	541.2	0.085	541.2	0.093
541.4	0.086	541.4	0.09	541.4	0.097	541.4	0.106	541.4	0.119				541.4	0.08	541.4	0.095	541.4	0.084	541.4	0.085	541.4	0.092
541.6	0.085	541.6	0.089	541.6	0.096	541.6	0.105	541.6	0.119				541.6	0.08	541.6	0.095	541.6	0.084	541.6	0.084	541.6	0.092
541.8	0.085	541.8	0.089	541.8	0.096	541.8	0.105	541.8	0.118				541.8	0.079	541.8	0.094	541.8	0.084	541.8	0.084	541.8	0.092
542	0.085	542	0.089	542	0.095	542	0.104	542	0.118				542	0.079	542	0.094	542	0.083	542	0.084	542	0.091
542.2	0.084	542.2	0.088	542.2	0.095	542.2	0.104	542.2	0.117				542.2	0.079	542.2	0.094	542.2	0.083	542.2	0.084	542.2	0.091
542.4	0.084	542.4	0.088	542.4	0.095	542.4	0.104	542.4	0.117				542.4	0.079	542.4	0.093	542.4	0.083	542.4	0.083	542.4	0.091
542.6	0.083	542.6	0.087	542.6	0.094	542.6	0.103	542.6	0.116				542.6	0.078	542.6	0.093	542.6	0.082	542.6	0.083	542.6	0.09
542.8	0.083	542.8	0.087	542.8	0.094	542.8	0.103	542.8	0.116				542.8	0.078	542.8	0.093	542.8	0.082	542.8	0.083	542.8	0.09
543	0.083	543	0.087	543	0.094	543	0.103	543	0.115				543	0.077	543	0.092	543	0.082	543	0.082	543	0.09
543.2	0.082	543.2	0.086	543.2	0.093	543.2	0.102	543.2	0.115				543.2	0.077	543.2	0.092	543.2	0.081	543.2	0.082	543.2	0.089
543.4	0.082	543.4	0.086	543.4	0.093	543.4	0.102	543.4	0.114				543.4	0.077	543.4	0.092	543.4	0.081	543.4	0.082	543.4	0.089
543.6	0.082	543.6	0.086	543.6	0.093	543.6	0.101	543.6	0.114				543.6	0.077	543.6	0.091	543.6	0.081	543.6	0.081	543.6	0.089
543.8	0.081	543.8	0.085	543.8	0.092	543.8	0.101	543.8	0.114				543.8	0.076	543.8	0.091	543.8	0.08	543.8	0.081	543.8	0.088
544	0.081	544	0.085	544	0.092	544	0.1	544	0.113				544	0.076	544	0.09	544	0.08	544	0.081	544	0.088
544.2	0.081	544.2	0.085	544.2	0.092	544.2	0.1	544.2	0.113				544.2	0.076	544.2	0.09	544.2	0.08	544.2	0.08	544.2	0.088
544.4	0.08	544.4	0.084	544.4	0.091	544.4	0.1	544.4	0.112				544.4	0.076	544.4	0.09	544.4	0.08	544.4	0.08	544.4	0.087
544.6	0.08	544.6	0.084	544.6	0.091	544.6	0.099	544.6	0.112				544.6	0.075	544.6	0.089	544.6	0.079	544.6	0.08	544.6	0.087
544.8	0.08	544.8	0.083	544.8	0.09	544.8	0.099	544.8	0.111				544.8	0.075	544.8	0.089	544.8	0.079	544.8	0.08	544.8	0.087
545	0.079	545	0.083	545	0.09	545	0.098	545	0.111				545	0.075	545	0.089	545	0.079	545	0.08	545	0.087
545.2	0.079	545.2	0.083	545.2	0.089	545.2	0.098	545.2	0.11				545.2	0.074	545.2	0.089	545.2	0.079	545.2	0.079	545.2	0.087
545.4	0.079	545.4	0.082	545.4	0.089	545.4	0.098	545.4	0.11				545.4	0.074	545.4	0.088	545.4	0.078	545.4	0.079	545.4	0.086
545.6	0.078	545.6	0.082	545.6	0.089	545.6	0.097	545.6	0.109				545.6	0.074	545.6	0.088	545.6	0.078	545.6	0.079	545.6	0.086
545.8	0.078	545.8	0.082	545.8	0.088	545.8	0.097	545.8	0.109				545.8	0.074	545.8	0.088	545.8	0.078	545.8	0.079	545.8	0.086
546	0.077	546	0.081	546	0.088	546	0.096	546	0.108				546	0.073	546	0.087	546	0.078	546	0.078	546	0.085
546.2	0.077	546.2	0.081	546.2	0.088	546.2	0.096	546.2	0.108				546.2	0.073	546.2	0.087	546.2	0.078	546.2	0.078	546.2	0.085
546.4	0.077	546.4	0.081	546.4	0.087	546.4	0.096	546.4	0.107				546.4	0.073	546.4	0.087	546.4	0.077	546.4	0.078	546.4	0.085
546.6	0.076	546.6	0.08	546.6	0.087	546.6	0.095	546.6	0.107				546.6	0.073	546.6	0.086	546.6	0.077	546.6	0.077	546.6	0.085
546.8	0.076	546.8	0.08	546.8	0.086	546.8	0.095	546.8	0.106				546.8	0.072	546.8	0.086	546.8	0.077	546.8	0.077	546.8	0.084
547	0.076	547	0.079	547	0.086	547	0.094	547	0.106				547	0.072	547	0.086	547	0.076	547	0.077	547	0.084
547.2	0.076	547.2	0.079	547.2	0.086	547.2	0.094	547.2	0.106				547.2	0.072	547.2	0.086	547.2	0.076	547.2	0.077	547.2	0.084
547.4	0.075	547.4	0.079	547.4	0.085	547.4	0.093	547.4	0.105				547.4	0.072	547.4	0.085	547.4	0.076	547.4	0.076	547.4	0.083
547.6	0.075	547.6	0.078	547.6	0.085	547.6	0.093	547.6	0.105				547.6	0.071	547.6	0.085	547.6	0.075	547.6	0.076	547.6	0.083
547.8	0.075	547.8	0.078	547.8	0.085	547.8	0.092	547.8	0.104				547.8	0.071	547.8	0.085	547.8	0.075	547.8	0.076	547.8	0.083
548	0.074	548	0.078	548	0.084	548	0.092	548	0.104				548	0.071	548	0.084	548	0.075	548	0.075	548	0.083
548.2	0.074	548.2	0.077	548.2	0.084	548.2	0.092	548.2	0.103				548.2	0.071	548.2	0.084	548.2	0.075	548.2	0.075	548.2	0.083
548.4	0.074	548.4	0.077	548.4	0.084	548.4	0.092	548.4	0.103				548.4	0.07	548.4	0.084	548.4	0.074	548.4	0.075	548.4	0.082
548.6	0.073	548.6	0.077	548.6	0.083	548.6	0.091	548.6	0.102				548.6	0.07	548.6	0.084	548.6	0.074	548.6	0.075	548.6	0.082
548.8	0.073	548.8	0.076	548.8	0.083	548.8	0.091	548.8	0.102				548.8	0.07	548.8	0.083	548.8	0.074	548.8	0.075	548.8	0.082
549	0.073	549	0.076	549	0.082	549	0.09	549	0.102				549	0.07	549	0.083	549	0.074	549	0.074	549	0.081
549.2	0.072	549.2	0.076	549.2	0.082	549.2	0.09	549.2	0.101				549.2	0.069	549.2	0.083	549.2	0.074	549.2	0.074	549.2	0.081
549.4	0.072	549.4	0.076	549.4	0.082	549.4	0.09	549.4	0.101				549.4	0.069	549.4	0.082	549.4	0.073	549.4	0.074	549.4	0.081
549.6	0.072	549.6	0.075	549.6	0.081	549.6	0.089	549.6	0.1				549.6	0.069	549.6	0.082	549.6	0.073	549.6	0.074	549.6	0.08
549.8	0.071	549.8	0.075	549.8	0.081	549.8	0.089	549.8	0.1				549.8	0.068	549.8	0.082	549.8	0.073	549.8	0.073	549.8	0.08
550	0.071	550	0.074	550	0.08	550	0.088	550	0.099				550	0.068	550	0.082	550	0.072	550	0.073	550	0.08
550.2	0.071	550.2	0.074	550.2	0.08	550.2	0.088	550.2	0.099				550.2	0.068	550.2	0.081	550.2	0.072	550.2	0.073	550.2	0.08
550.4	0.07	550.4	0.074	550.4	0.08	550.4	0.087	550.4	0.098				550.4	0.068	550.4	0.081	550.4	0.072	550.4	0.073	550.4	0.08
550.6	0.07	550.6	0.073	550.6	0.079	550.6	0.087	550.6	0.098				550.6	0.068	550.6	0.081	550.6	0.072	550.6	0.072	550.6	0.079
550.8	0.07	550.8	0.073	550.8	0.079	550.8	0.086	550.8	0.098				550.8	0.067	550.8	0.081	550.8	0.072	550.8	0.072	550.8	0.079
551	0.069	551	0.073	551	0.079	551	0.086	551	0.097				551	0.067	551	0.08	551	0.071	551	0.072	551	0.079
551.2	0.069	551.2	0.072	551.2	0.078	551.2	0.086	551.2	0.097				551.2	0.067	551.2	0.08	551.2	0.071	551.2	0.072	551.2	0.079
551.4	0.069	551.4	0.072	551.4	0.078	551.4	0.085	551.4	0.096				551.4	0.067	551.4	0.08	551.4	0.071	551.4	0.071	551.4	0.079
551.6	0.069	551.6	0.072	551.6	0.078	551.6	0.085	551.6	0.096				551.6	0.067	551.6	0.079	551.6	0.071	551.6	0.071	551.6	0.078
551.8	0.068	551.8	0.071	551.8	0.077	551.8	0.085	551.8	0.096				551.8	0.066	551.8	0.079	551.8	0.07	551.8	0.071	551.8	0.078
552	0.068	552	0.071	552	0.077	552	0.084	552	0.095				552	0.066	552	0.079	552	0.07	552	0.071	552	0.078
552.2	0.068	552.2	0.071	552.2	0.077	552.2	0.084	552.2	0.095				552.2	0.066	552.2	0.079	552.2	0.07	552.2	0.07	552.2	0.077
552.4	0.068	552.4	0.071	552.4	0.076	552.4	0.084	552.4	0.094				552.4	0.066	552.4	0.078	552.4	0.07	552.4	0.07	552.4	0.077
552.6	0.067	552.6	0.07	552.6	0.076	552.6	0.083	552.6	0.094				552.6	0.066	552.6	0.078	552.6	0.069	552.6	0.07	552.6	0.077
552.8	0.067	552.8	0.07	552.8	0.076	552.8	0.083	552.8	0.094				552.8	0.065	552.8	0.078	552.8	0.069	552.8	0.07	552.8	0.077
553	0.067	553	0.07	553	0.075	553	0.083	553	0.093				553	0.065	553	0.077	553	0.069	553	0.069	553	0.076
553.2	0.066	553.2	0.069	553.2	0.075	553.2	0.082	553.2	0.093				553.2	0.065	553.2	0.077	553.2	0.069	553.2	0.069	553.2	0.076
553.4	0.066	553.4	0.069	553.4	0.075	553.4	0.082	553.4	0.092				553.4	0.064	553.4	0.077	553.4	0.068	553.4	0.069	553.4	0.076
553.6	0.066	553.6	0.069	553.6	0.074	553.6	0.082	553.6	0.092				553.6	0.064	553.6	0.077	553.6	0.068	553.6	0.069	553.6	0.076
553.8	0.065	553.8	0.068	553.8	0.074	553.8	0.081	553.8	0.092				553.8	0.064	553.8	0.077	553.8	0.068	553.8	0.069	553.8	0.076
554	0.065	554	0.068	554	0.074	554	0.081	554	0.091				554	0.064	554	0.076	554	0.068	554	0.069	554	0.075
554.2	0.065	554.2	0.068	554.2	0.074	554.2	0.081	554.2	0.091				554.2	0.064	554.2	0.076	554.2	0.067	554.2	0.068	554.2	0.075
554.4	0.065	554.4	0.067	554.4	0.073	554.4	0.08	554.4	0.091				554.4	0.063	554.4	0.076	554.4	0.067	554.4	0.068	554.4	0.075
554.6	0.064	554.6	0.067	554.6	0.073	554.6	0.08	554.6	0.09				554.6	0.063	554.6	0.076	554.6	0.067	554.6	0.068	554.6	0.075
554.8	0.064	554.8	0.067	554.8	0.073	554.8	0.08	554.8	0.09				554.8	0.063	554.8	0.075	554.8	0.067	554.8	0.068	554.8	0.075
555	0.064	555	0.067	555	0.072	555	0.079	555	0.09				555	0.063	555	0.075	555	0.067	555	0.067	555	0.074
555.2	0.064	555.2	0.067	555.2	0.072	555.2	0.079	555.2	0.089				555.2	0.062	555.2	0.075	555.2	0.066	555.2	0.067	555.2	0.074
555.4	0.063	555.4	0.066	555.4	0.072	555.4	0.079	555.4	0.089				555.4	0.062	555.4	0.074	555.4	0.066	555.4	0.067	555.4	0.074
555.6	0.063	555.6	0.066	555.6	0.072	555.6	0.078	555.6	0.088				555.6	0.062	555.6	0.074	555.6	0.066	555.6	0.067	555.6	0.073
555.8	0.063	555.8	0.066	555.8	0.071	555.8	0.078	555.8	0.088				555.8	0.062	555.8	0.074	555.8	0.066	555.8	0.067	555.8	0.073
556	0.062	556	0.065	556	0.071	556	0.078	556	0.088				556	0.062	556	0.073	556	0.065	556	0.066	556	0.073
556.2	0.062	556.2	0.065	556.2	0.07	556.2	0.077	556.2	0.087				556.2	0.061	556.2	0.073	556.2	0.065	556.2	0.066	556.2	0.073
556.4	0.062	556.4	0.065	556.4	0.07	556.4	0.077	556.4	0.087				556.4	0.061	556.4	0.073	556.4	0.065	556.4	0.066	556.4	0.073
556.6	0.061	556.6	0.064	556.6	0.07	556.6	0.077	556.6	0.087				556.6	0.061	556.6	0.073	556.6	0.065	556.6	0.066	556.6	0.072
556.8	0.061	556.8	0.064	556.8	0.069	556.8	0.076	556.8	0.086				556.8	0.061	556.8	0.072	556.8	0.065	556.8	0.066	556.8	0.072
557	0.061	557	0.064	557	0.069	557	0.076	557	0.086				557	0.06	557	0.072	557	0.064	557	0.065	557	0.072
557.2	0.061	557.2	0.064	557.2	0.069	557.2	0.076	557.2	0.085				557.2	0.06	557.2	0.072	557.2	0.064	557.2	0.065	557.2	0.072
557.4	0.06	557.4	0.063	557.4	0.069	557.4	0.075	557.4	0.085				557.4	0.06	557.4	0.072	557.4	0.064	557.4	0.065	557.4	0.072
557.6	0.06	557.6	0.063	557.6	0.068	557.6	0.075	557.6	0.085				557.6	0.06	557.6	0.071	557.6	0.064	557.6	0.065	557.6	0.072
557.8	0.06	557.8	0.063	557.8	0.068	557.8	0.075	557.8	0.084				557.8	0.06	557.8	0.071	557.8	0.063	557.8	0.065	557.8	0.071
558	0.059	558	0.063	558	0.068	558	0.074	558	0.084				558	0.059	558	0.071	558	0.063	558	0.064	558	0.071
558.2	0.059	558.2	0.062	558.2	0.067	558.2	0.074	558.2	0.084				558.2	0.059	558.2	0.071	558.2	0.063	558.2	0.064	558.2	0.071
558.4	0.059	558.4	0.062	558.4	0.067	558.4	0.074	558.4	0.083				558.4	0.059	558.4	0.071	558.4	0.063	558.4	0.064	558.4	0.071
558.6	0.059	558.6	0.062	558.6	0.067	558.6	0.074	558.6	0.083				558.6	0.059	558.6	0.071	558.6	0.063	558.6	0.064	558.6	0.071
558.8	0.059	558.8	0.061	558.8	0.067	558.8	0.073	558.8	0.083				558.8	0.059	558.8	0.07	558.8	0.062	558.8	0.064	558.8	0.07
559	0.058	559	0.061	559	0.066	559	0.073	559	0.083				559	0.059	559	0.07	559	0.062	559	0.063	559	0.07
559.2	0.058	559.2	0.061	559.2	0.066	559.2	0.073	559.2	0.082				559.2	0.058	559.2	0.07	559.2	0.062	559.2	0.063	559.2	0.07
559.4	0.058	559.4	0.061	559.4	0.066	559.4	0.073	559.4	0.082				559.4	0.058	559.4	0.069	559.4	0.062	559.4	0.063	559.4	0.07
559.6	0.058	559.6	0.061	559.6	0.066	559.6	0.072	559.6	0.082				559.6	0.058	559.6	0.069	559.6	0.062	559.6	0.063	559.6	0.069
559.8	0.058	559.8	0.061	559.8	0.066	559.8	0.072	559.8	0.081				559.8	0.058	559.8	0.069	559.8	0.061	559.8	0.063	559.8	0.069
560	0.057	560	0.06	560	0.065	560	0.072	560	0.081				560	0.057	560	0.069	560	0.061	560	0.062	560	0.069
560.2	0.057	560.2	0.06	560.2	0.065	560.2	0.072	560.2	0.081				560.2	0.057	560.2	0.068	560.2	0.061	560.2	0.062	560.2	0.069
560.4	0.057	560.4	0.06	560.4	0.065	560.4	0.071	560.4	0.08				560.4	0.057	560.4	0.068	560.4	0.06	560.4	0.062	560.4	0.069
560.6	0.057	560.6	0.06	560.6	0.064	560.6	0.071	560.6	0.08				560.6	0.057	560.6	0.068	560.6	0.06	560.6	0.062	560.6	0.068
560.8	0.056	560.8	0.059	560.8	0.064	560.8	0.071	560.8	0.08				560.8	0.057	560.8	0.068	560.8	0.06	560.8	0.062	560.8	0.068
561	0.056	561	0.059	561	0.064	561	0.071	561	0.079				561	0.057	561	0.067	561	0.06	561	0.062	561	0.068
561.2	0.056	561.2	0.059	561.2	0.064	561.2	0.07	561.2	0.079				561.2	0.057	561.2	0.067	561.2	0.06	561.2	0.062	561.2	0.068
561.4	0.056	561.4	0.058	561.4	0.063	561.4	0.07	561.4	0.079				561.4	0.056	561.4	0.067	561.4	0.06	561.4	0.061	561.4	0.068
561.6	0.056	561.6	0.058	561.6	0.063	561.6	0.069	561.6	0.078				561.6	0.056	561.6	0.067	561.6	0.06	561.6	0.061	561.6	0.068
561.8	0.055	561.8	0.058	561.8	0.063	561.8	0.069	561.8	0.078				561.8	0.056	561.8	0.067	561.8	0.06	561.8	0.061	561.8	0.067
562	0.055	562	0.058	562	0.062	562	0.069	562	0.078				562	0.056	562	0.067	562	0.059	562	0.061	562	0.067
562.2	0.055	562.2	0.057	562.2	0.062	562.2	0.069	562.2	0.077				562.2	0.056	562.2	0.066	562.2	0.059	562.2	0.061	562.2	0.067
562.4	0.055	562.4	0.057	562.4	0.062	562.4	0.068	562.4	0.077				562.4	0.056	562.4	0.066	562.4	0.059	562.4	0.06	562.4	0.067
562.6	0.054	562.6	0.057	562.6	0.062	562.6	0.068	562.6	0.077				562.6	0.055	562.6	0.066	562.6	0.059	562.6	0.06	562.6	0.067
562.8	0.054	562.8	0.057	562.8	0.061	562.8	0.067	562.8	0.076				562.8	0.055	562.8	0.066	562.8	0.058	562.8	0.06	562.8	0.066
563	0.054	563	0.057	563	0.061	563	0.067	563	0.076				563	0.055	563	0.065	563	0.058	563	0.06	563	0.066
563.2	0.054	563.2	0.056	563.2	0.061	563.2	0.067	563.2	0.076				563.2	0.054	563.2	0.065	563.2	0.058	563.2	0.06	563.2	0.066
563.4	0.053	563.4	0.056	563.4	0.061	563.4	0.067	563.4	0.075				563.4	0.054	563.4	0.065	563.4	0.058	563.4	0.059	563.4	0.066
563.6	0.053	563.6	0.056	563.6	0.06	563.6	0.066	563.6	0.075				563.6	0.054	563.6	0.064	563.6	0.058	563.6	0.059	563.6	0.066
563.8	0.053	563.8	0.056	563.8	0.06	563.8	0.066	563.8	0.075				563.8	0.054	563.8	0.064	563.8	0.058	563.8	0.059	563.8	0.065
564	0.053	564	0.055	564	0.06	564	0.066	564	0.075				564	0.054	564	0.064	564	0.057	564	0.059	564	0.065
564.2	0.052	564.2	0.055	564.2	0.06	564.2	0.066	564.2	0.074				564.2	0.054	564.2	0.064	564.2	0.057	564.2	0.059	564.2	0.065
564.4	0.052	564.4	0.055	564.4	0.059	564.4	0.066	564.4	0.074				564.4	0.053	564.4	0.064	564.4	0.057	564.4	0.059	564.4	0.065
564.6	0.052	564.6	0.055	564.6	0.059	564.6	0.065	564.6	0.074				564.6	0.053	564.6	0.063	564.6	0.057	564.6	0.058	564.6	0.065
564.8	0.052	564.8	0.055	564.8	0.059	564.8	0.065	564.8	0.073				564.8	0.053	564.8	0.063	564.8	0.057	564.8	0.058	564.8	0.064
565	0.052	565	0.054	565	0.059	565	0.065	565	0.073				565	0.053	565	0.063	565	0.056	565	0.058	565	0.064
565.2	0.051	565.2	0.054	565.2	0.058	565.2	0.065	565.2	0.073				565.2	0.053	565.2	0.063	565.2	0.056	565.2	0.058	565.2	0.064
565.4	0.051	565.4	0.054	565.4	0.058	565.4	0.064	565.4	0.072				565.4	0.053	565.4	0.063	565.4	0.056	565.4	0.058	565.4	0.064
565.6	0.051	565.6	0.054	565.6	0.058	565.6	0.064	565.6	0.072				565.6	0.052	565.6	0.062	565.6	0.056	565.6	0.058	565.6	0.064
565.8	0.051	565.8	0.054	565.8	0.058	565.8	0.064	565.8	0.072				565.8	0.052	565.8	0.062	565.8	0.056	565.8	0.057	565.8	0.064
566	0.05	566	0.053	566	0.058	566	0.064	566	0.072				566	0.052	566	0.062	566	0.055	566	0.057	566	0.063
566.2	0.05	566.2	0.053	566.2	0.057	566.2	0.063	566.2	0.071				566.2	0.052	566.2	0.062	566.2	0.055	566.2	0.057	566.2	0.063
566.4	0.05	566.4	0.053	566.4	0.057	566.4	0.063	566.4	0.071				566.4	0.052	566.4	0.062	566.4	0.055	566.4	0.057	566.4	0.063
566.6	0.05	566.6	0.053	566.6	0.057	566.6	0.063	566.6	0.071				566.6	0.052	566.6	0.061	566.6	0.055	566.6	0.057	566.6	0.063
566.8	0.05	566.8	0.053	566.8	0.057	566.8	0.063	566.8	0.071				566.8	0.051	566.8	0.061	566.8	0.055	566.8	0.057	566.8	0.063
567	0.05	567	0.052	567	0.056	567	0.062	567	0.07				567	0.051	567	0.061	567	0.054	567	0.056	567	0.063
567.2	0.049	567.2	0.052	567.2	0.056	567.2	0.062	567.2	0.07				567.2	0.051	567.2	0.061	567.2	0.054	567.2	0.056	567.2	0.062
567.4	0.049	567.4	0.052	567.4	0.056	567.4	0.062	567.4	0.07				567.4	0.051	567.4	0.061	567.4	0.054	567.4	0.056	567.4	0.062
567.6	0.049	567.6	0.052	567.6	0.056	567.6	0.062	567.6	0.069				567.6	0.051	567.6	0.061	567.6	0.054	567.6	0.056	567.6	0.062
567.8	0.049	567.8	0.051	567.8	0.055	567.8	0.061	567.8	0.069				567.8	0.051	567.8	0.06	567.8	0.054	567.8	0.056	567.8	0.062
568	0.049	568	0.051	568	0.055	568	0.061	568	0.069				568	0.05	568	0.06	568	0.054	568	0.056	568	0.062
568.2	0.048	568.2	0.051	568.2	0.055	568.2	0.061	568.2	0.069				568.2	0.05	568.2	0.06	568.2	0.054	568.2	0.055	568.2	0.062
568.4	0.048	568.4	0.051	568.4	0.055	568.4	0.061	568.4	0.068				568.4	0.05	568.4	0.06	568.4	0.053	568.4	0.055	568.4	0.061
568.6	0.048	568.6	0.051	568.6	0.055	568.6	0.06	568.6	0.068				568.6	0.05	568.6	0.06	568.6	0.053	568.6	0.055	568.6	0.061
568.8	0.048	568.8	0.05	568.8	0.054	568.8	0.06	568.8	0.068				568.8	0.05	568.8	0.059	568.8	0.053	568.8	0.055	568.8	0.061
569	0.048	569	0.05	569	0.054	569	0.06	569	0.068				569	0.05	569	0.059	569	0.053	569	0.055	569	0.061
569.2	0.047	569.2	0.05	569.2	0.054	569.2	0.06	569.2	0.067				569.2	0.049	569.2	0.059	569.2	0.053	569.2	0.055	569.2	0.061
569.4	0.047	569.4	0.05	569.4	0.054	569.4	0.06	569.4	0.067				569.4	0.049	569.4	0.059	569.4	0.053	569.4	0.055	569.4	0.061
569.6	0.047	569.6	0.05	569.6	0.053	569.6	0.059	569.6	0.067				569.6	0.049	569.6	0.059	569.6	0.053	569.6	0.055	569.6	0.06
569.8	0.047	569.8	0.049	569.8	0.053	569.8	0.059	569.8	0.066				569.8	0.049	569.8	0.058	569.8	0.052	569.8	0.054	569.8	0.06
570	0.046	570	0.049	570	0.053	570	0.059	570	0.066				570	0.049	570	0.058	570	0.052	570	0.054	570	0.06
570.2	0.046	570.2	0.049	570.2	0.053	570.2	0.058	570.2	0.066				570.2	0.049	570.2	0.058	570.2	0.052	570.2	0.054	570.2	0.06
570.4	0.046	570.4	0.049	570.4	0.053	570.4	0.058	570.4	0.066				570.4	0.048	570.4	0.058	570.4	0.052	570.4	0.054	570.4	0.06
570.6	0.046	570.6	0.049	570.6	0.052	570.6	0.058	570.6	0.066				570.6	0.048	570.6	0.058	570.6	0.052	570.6	0.054	570.6	0.06
570.8	0.046	570.8	0.048	570.8	0.052	570.8	0.058	570.8	0.065				570.8	0.048	570.8	0.058	570.8	0.052	570.8	0.054	570.8	0.059
571	0.046	571	0.048	571	0.052	571	0.058	571	0.065				571	0.048	571	0.057	571	0.052	571	0.054	571	0.059
571.2	0.046	571.2	0.048	571.2	0.052	571.2	0.058	571.2	0.065				571.2	0.048	571.2	0.057	571.2	0.051	571.2	0.053	571.2	0.059
571.4	0.045	571.4	0.048	571.4	0.052	571.4	0.057	571.4	0.065				571.4	0.048	571.4	0.057	571.4	0.051	571.4	0.053	571.4	0.059
571.6	0.045	571.6	0.048	571.6	0.051	571.6	0.057	571.6	0.064				571.6	0.048	571.6	0.057	571.6	0.051	571.6	0.053	571.6	0.059
571.8	0.045	571.8	0.048	571.8	0.051	571.8	0.057	571.8	0.064				571.8	0.047	571.8	0.057	571.8	0.051	571.8	0.053	571.8	0.059
572	0.045	572	0.047	572	0.051	572	0.057	572	0.064				572	0.047	572	0.056	572	0.051	572	0.053	572	0.059
572.2	0.045	572.2	0.047	572.2	0.051	572.2	0.056	572.2	0.064				572.2	0.047	572.2	0.056	572.2	0.051	572.2	0.053	572.2	0.059
572.4	0.044	572.4	0.047	572.4	0.051	572.4	0.056	572.4	0.063				572.4	0.047	572.4	0.056	572.4	0.05	572.4	0.052	572.4	0.058
572.6	0.044	572.6	0.047	572.6	0.05	572.6	0.056	572.6	0.063				572.6	0.047	572.6	0.056	572.6	0.05	572.6	0.052	572.6	0.058
572.8	0.044	572.8	0.047	572.8	0.05	572.8	0.056	572.8	0.063				572.8	0.047	572.8	0.056	572.8	0.05	572.8	0.052	572.8	0.058
573	0.044	573	0.046	573	0.05	573	0.056	573	0.063				573	0.047	573	0.056	573	0.05	573	0.052	573	0.058
573.2	0.044	573.2	0.046	573.2	0.05	573.2	0.055	573.2	0.063				573.2	0.046	573.2	0.055	573.2	0.05	573.2	0.052	573.2	0.058
573.4	0.044	573.4	0.046	573.4	0.05	573.4	0.055	573.4	0.062				573.4	0.046	573.4	0.055	573.4	0.05	573.4	0.052	573.4	0.058
573.6	0.043	573.6	0.046	573.6	0.05	573.6	0.055	573.6	0.062				573.6	0.046	573.6	0.055	573.6	0.05	573.6	0.052	573.6	0.057
573.8	0.043	573.8	0.046	573.8	0.05	573.8	0.055	573.8	0.062				573.8	0.046	573.8	0.055	573.8	0.049	573.8	0.051	573.8	0.057
574	0.043	574	0.046	574	0.049	574	0.055	574	0.062				574	0.046	574	0.055	574	0.049	574	0.051	574	0.057
574.2	0.043	574.2	0.046	574.2	0.049	574.2	0.055	574.2	0.061				574.2	0.046	574.2	0.054	574.2	0.049	574.2	0.051	574.2	0.057
574.4	0.043	574.4	0.045	574.4	0.049	574.4	0.054	574.4	0.061				574.4	0.046	574.4	0.054	574.4	0.049	574.4	0.051	574.4	0.057
574.6	0.043	574.6	0.045	574.6	0.049	574.6	0.054	574.6	0.061				574.6	0.045	574.6	0.054	574.6	0.049	574.6	0.051	574.6	0.057
574.8	0.042	574.8	0.045	574.8	0.049	574.8	0.054	574.8	0.061				574.8	0.045	574.8	0.054	574.8	0.049	574.8	0.051	574.8	0.057
575	0.042	575	0.045	575	0.048	575	0.054	575	0.06				575	0.045	575	0.054	575	0.049	575	0.051	575	0.056
575.2	0.042	575.2	0.045	575.2	0.048	575.2	0.054	575.2	0.06				575.2	0.045	575.2	0.054	575.2	0.049	575.2	0.05	575.2	0.056
575.4	0.042	575.4	0.044	575.4	0.048	575.4	0.053	575.4	0.06				575.4	0.045	575.4	0.054	575.4	0.048	575.4	0.05	575.4	0.056
575.6	0.042	575.6	0.044	575.6	0.048	575.6	0.053	575.6	0.06				575.6	0.045	575.6	0.053	575.6	0.048	575.6	0.05	575.6	0.056
575.8	0.041	575.8	0.044	575.8	0.048	575.8	0.053	575.8	0.059				575.8	0.045	575.8	0.053	575.8	0.048	575.8	0.05	575.8	0.056
576	0.041	576	0.044	576	0.047	576	0.053	576	0.059				576	0.044	576	0.053	576	0.048	576	0.05	576	0.056
576.2	0.041	576.2	0.044	576.2	0.047	576.2	0.052	576.2	0.059				576.2	0.044	576.2	0.053	576.2	0.048	576.2	0.05	576.2	0.056
576.4	0.041	576.4	0.044	576.4	0.047	576.4	0.052	576.4	0.059				576.4	0.044	576.4	0.053	576.4	0.048	576.4	0.05	576.4	0.055
576.6	0.041	576.6	0.044	576.6	0.047	576.6	0.052	576.6	0.059				576.6	0.044	576.6	0.052	576.6	0.048	576.6	0.05	576.6	0.055
576.8	0.041	576.8	0.043	576.8	0.047	576.8	0.052	576.8	0.058				576.8	0.044	576.8	0.052	576.8	0.048	576.8	0.049	576.8	0.055
577	0.04	577	0.043	577	0.046	577	0.052	577	0.058				577	0.044	577	0.052	577	0.048	577	0.049	577	0.055
577.2	0.04	577.2	0.043	577.2	0.046	577.2	0.052	577.2	0.058				577.2	0.044	577.2	0.052	577.2	0.047	577.2	0.049	577.2	0.055
577.4	0.04	577.4	0.043	577.4	0.046	577.4	0.051	577.4	0.058				577.4	0.043	577.4	0.052	577.4	0.047	577.4	0.049	577.4	0.055
577.6	0.04	577.6	0.043	577.6	0.046	577.6	0.051	577.6	0.057				577.6	0.043	577.6	0.052	577.6	0.047	577.6	0.049	577.6	0.055
577.8	0.04	577.8	0.043	577.8	0.046	577.8	0.051	577.8	0.057				577.8	0.043	577.8	0.051	577.8	0.047	577.8	0.049	577.8	0.054
578	0.04	578	0.042	578	0.046	578	0.051	578	0.057				578	0.043	578	0.051	578	0.047	578	0.049	578	0.054
578.2	0.039	578.2	0.042	578.2	0.046	578.2	0.051	578.2	0.057				578.2	0.043	578.2	0.051	578.2	0.047	578.2	0.049	578.2	0.054
578.4	0.039	578.4	0.042	578.4	0.045	578.4	0.051	578.4	0.057				578.4	0.043	578.4	0.051	578.4	0.047	578.4	0.049	578.4	0.054
578.6	0.039	578.6	0.042	578.6	0.045	578.6	0.05	578.6	0.056				578.6	0.043	578.6	0.051	578.6	0.046	578.6	0.049	578.6	0.054
578.8	0.039	578.8	0.042	578.8	0.045	578.8	0.05	578.8	0.056				578.8	0.043	578.8	0.051	578.8	0.046	578.8	0.048	578.8	0.054
579	0.039	579	0.041	579	0.045	579	0.05	579	0.056				579	0.042	579	0.051	579	0.046	579	0.048	579	0.054
579.2	0.039	579.2	0.041	579.2	0.044	579.2	0.05	579.2	0.056				579.2	0.042	579.2	0.05	579.2	0.046	579.2	0.048	579.2	0.054
579.4	0.039	579.4	0.041	579.4	0.044	579.4	0.05	579.4	0.055				579.4	0.042	579.4	0.05	579.4	0.046	579.4	0.048	579.4	0.053
579.6	0.038	579.6	0.041	579.6	0.044	579.6	0.049	579.6	0.055				579.6	0.042	579.6	0.05	579.6	0.046	579.6	0.048	579.6	0.053
579.8	0.038	579.8	0.041	579.8	0.044	579.8	0.049	579.8	0.055				579.8	0.042	579.8	0.05	579.8	0.046	579.8	0.048	579.8	0.053
580	0.038	580	0.041	580	0.044	580	0.049	580	0.055				580	0.042	580	0.05	580	0.046	580	0.048	580	0.053
580.2	0.038	580.2	0.041	580.2	0.044	580.2	0.049	580.2	0.055				580.2	0.042	580.2	0.05	580.2	0.046	580.2	0.048	580.2	0.053
580.4	0.038	580.4	0.04	580.4	0.044	580.4	0.049	580.4	0.055				580.4	0.042	580.4	0.049	580.4	0.045	580.4	0.048	580.4	0.053
580.6	0.038	580.6	0.04	580.6	0.044	580.6	0.049	580.6	0.054				580.6	0.042	580.6	0.049	580.6	0.045	580.6	0.048	580.6	0.053
580.8	0.038	580.8	0.04	580.8	0.043	580.8	0.048	580.8	0.054				580.8	0.042	580.8	0.049	580.8	0.045	580.8	0.048	580.8	0.053
581	0.037	581	0.04	581	0.043	581	0.048	581	0.054				581	0.041	581	0.049	581	0.045	581	0.047	581	0.053
581.2	0.037	581.2	0.04	581.2	0.043	581.2	0.048	581.2	0.054				581.2	0.041	581.2	0.049	581.2	0.045	581.2	0.047	581.2	0.052
581.4	0.037	581.4	0.04	581.4	0.043	581.4	0.048	581.4	0.054				581.4	0.041	581.4	0.049	581.4	0.045	581.4	0.047	581.4	0.052
581.6	0.037	581.6	0.04	581.6	0.043	581.6	0.048	581.6	0.053				581.6	0.041	581.6	0.049	581.6	0.045	581.6	0.047	581.6	0.052
581.8	0.037	581.8	0.039	581.8	0.043	581.8	0.047	581.8	0.053				581.8	0.041	581.8	0.048	581.8	0.045	581.8	0.047	581.8	0.052
582	0.037	582	0.039	582	0.042	582	0.047	582	0.053				582	0.041	582	0.048	582	0.044	582	0.047	582	0.052
582.2	0.037	582.2	0.039	582.2	0.042	582.2	0.047	582.2	0.053				582.2	0.041	582.2	0.048	582.2	0.044	582.2	0.046	582.2	0.052
582.4	0.036	582.4	0.039	582.4	0.042	582.4	0.047	582.4	0.053				582.4	0.04	582.4	0.048	582.4	0.044	582.4	0.046	582.4	0.052
582.6	0.036	582.6	0.039	582.6	0.042	582.6	0.047	582.6	0.052				582.6	0.04	582.6	0.048	582.6	0.044	582.6	0.046	582.6	0.051
582.8	0.036	582.8	0.039	582.8	0.042	582.8	0.047	582.8	0.052				582.8	0.04	582.8	0.048	582.8	0.044	582.8	0.046	582.8	0.051
583	0.036	583	0.039	583	0.042	583	0.047	583	0.052				583	0.04	583	0.047	583	0.044	583	0.046	583	0.051
583.2	0.036	583.2	0.038	583.2	0.041	583.2	0.046	583.2	0.052				583.2	0.04	583.2	0.047	583.2	0.044	583.2	0.046	583.2	0.051
583.4	0.036	583.4	0.038	583.4	0.041	583.4	0.046	583.4	0.052				583.4	0.04	583.4	0.047	583.4	0.044	583.4	0.046	583.4	0.051
583.6	0.036	583.6	0.038	583.6	0.041	583.6	0.046	583.6	0.051				583.6	0.04	583.6	0.047	583.6	0.044	583.6	0.046	583.6	0.051
583.8	0.035	583.8	0.038	583.8	0.041	583.8	0.046	583.8	0.051				583.8	0.04	583.8	0.047	583.8	0.043	583.8	0.046	583.8	0.051
584	0.035	584	0.038	584	0.041	584	0.046	584	0.051				584	0.039	584	0.047	584	0.043	584	0.045	584	0.051
584.2	0.035	584.2	0.038	584.2	0.041	584.2	0.046	584.2	0.051				584.2	0.039	584.2	0.047	584.2	0.043	584.2	0.045	584.2	0.05
584.4	0.035	584.4	0.038	584.4	0.041	584.4	0.045	584.4	0.051				584.4	0.039	584.4	0.046	584.4	0.043	584.4	0.045	584.4	0.05
584.6	0.035	584.6	0.037	584.6	0.04	584.6	0.045	584.6	0.051				584.6	0.039	584.6	0.046	584.6	0.043	584.6	0.045	584.6	0.05
584.8	0.035	584.8	0.037	584.8	0.04	584.8	0.045	584.8	0.05				584.8	0.039	584.8	0.046	584.8	0.043	584.8	0.045	584.8	0.05
585	0.035	585	0.037	585	0.04	585	0.045	585	0.05				585	0.039	585	0.046	585	0.043	585	0.045	585	0.05
585.2	0.035	585.2	0.037	585.2	0.04	585.2	0.045	585.2	0.05				585.2	0.039	585.2	0.046	585.2	0.043	585.2	0.045	585.2	0.05
585.4	0.034	585.4	0.037	585.4	0.04	585.4	0.045	585.4	0.05				585.4	0.039	585.4	0.046	585.4	0.042	585.4	0.045	585.4	0.05
585.6	0.034	585.6	0.037	585.6	0.04	585.6	0.045	585.6	0.05				585.6	0.039	585.6	0.046	585.6	0.042	585.6	0.044	585.6	0.05
585.8	0.034	585.8	0.037	585.8	0.04	585.8	0.045	585.8	0.05				585.8	0.038	585.8	0.045	585.8	0.042	585.8	0.044	585.8	0.049
586	0.034	586	0.037	586	0.04	586	0.044	586	0.05				586	0.038	586	0.045	586	0.042	586	0.044	586	0.049
586.2	0.034	586.2	0.037	586.2	0.039	586.2	0.044	586.2	0.049				586.2	0.038	586.2	0.045	586.2	0.042	586.2	0.044	586.2	0.049
586.4	0.034	586.4	0.036	586.4	0.039	586.4	0.044	586.4	0.049				586.4	0.038	586.4	0.045	586.4	0.042	586.4	0.044	586.4	0.049
586.6	0.034	586.6	0.036	586.6	0.039	586.6	0.044	586.6	0.049				586.6	0.038	586.6	0.045	586.6	0.042	586.6	0.044	586.6	0.049
586.8	0.034	586.8	0.036	586.8	0.039	586.8	0.044	586.8	0.049				586.8	0.038	586.8	0.045	586.8	0.042	586.8	0.044	586.8	0.049
587	0.034	587	0.036	587	0.039	587	0.044	587	0.049				587	0.038	587	0.045	587	0.041	587	0.044	587	0.049
587.2	0.033	587.2	0.036	587.2	0.039	587.2	0.044	587.2	0.048				587.2	0.038	587.2	0.045	587.2	0.041	587.2	0.044	587.2	0.049
587.4	0.033	587.4	0.036	587.4	0.039	587.4	0.043	587.4	0.048				587.4	0.038	587.4	0.044	587.4	0.041	587.4	0.044	587.4	0.049
587.6	0.033	587.6	0.036	587.6	0.039	587.6	0.043	587.6	0.048				587.6	0.037	587.6	0.044	587.6	0.041	587.6	0.043	587.6	0.048
587.8	0.033	587.8	0.036	587.8	0.038	587.8	0.043	587.8	0.048				587.8	0.037	587.8	0.044	587.8	0.041	587.8	0.043	587.8	0.048
588	0.033	588	0.035	588	0.038	588	0.043	588	0.048				588	0.037	588	0.044	588	0.041	588	0.043	588	0.048
588.2	0.033	588.2	0.035	588.2	0.038	588.2	0.043	588.2	0.048				588.2	0.037	588.2	0.044	588.2	0.041	588.2	0.043	588.2	0.048
588.4	0.033	588.4	0.035	588.4	0.038	588.4	0.043	588.4	0.047				588.4	0.037	588.4	0.044	588.4	0.041	588.4	0.043	588.4	0.048
588.6	0.033	588.6	0.035	588.6	0.038	588.6	0.042	588.6	0.047				588.6	0.037	588.6	0.044	588.6	0.04	588.6	0.043	588.6	0.048
588.8	0.032	588.8	0.035	588.8	0.038	588.8	0.042	588.8	0.047				588.8	0.037	588.8	0.043	588.8	0.04	588.8	0.043	588.8	0.048
589	0.032	589	0.035	589	0.038	589	0.042	589	0.047				589	0.037	589	0.043	589	0.04	589	0.043	589	0.047
589.2	0.032	589.2	0.035	589.2	0.037	589.2	0.042	589.2	0.047				589.2	0.037	589.2	0.043	589.2	0.04	589.2	0.043	589.2	0.047
589.4	0.032	589.4	0.035	589.4	0.037	589.4	0.042	589.4	0.047				589.4	0.036	589.4	0.043	589.4	0.04	589.4	0.043	589.4	0.047
589.6	0.032	589.6	0.034	589.6	0.037	589.6	0.042	589.6	0.046				589.6	0.036	589.6	0.043	589.6	0.04	589.6	0.042	589.6	0.047
589.8	0.032	589.8	0.034	589.8	0.037	589.8	0.042	589.8	0.046				589.8	0.036	589.8	0.043	589.8	0.04	589.8	0.042	589.8	0.047
590	0.032	590	0.034	590	0.037	590	0.042	590	0.046				590	0.036	590	0.043	590	0.04	590	0.042	590	0.047
590.2	0.032	590.2	0.034	590.2	0.037	590.2	0.041	590.2	0.046				590.2	0.036	590.2	0.043	590.2	0.039	590.2	0.042	590.2	0.047
590.4	0.032	590.4	0.034	590.4	0.037	590.4	0.041	590.4	0.046				590.4	0.036	590.4	0.043	590.4	0.039	590.4	0.042	590.4	0.047
590.6	0.031	590.6	0.034	590.6	0.037	590.6	0.041	590.6	0.046				590.6	0.036	590.6	0.043	590.6	0.039	590.6	0.042	590.6	0.047
590.8	0.031	590.8	0.034	590.8	0.036	590.8	0.041	590.8	0.045				590.8	0.036	590.8	0.042	590.8	0.039	590.8	0.042	590.8	0.046
591	0.031	591	0.034	591	0.036	591	0.041	591	0.045				591	0.036	591	0.042	591	0.039	591	0.042	591	0.046
591.2	0.031	591.2	0.034	591.2	0.036	591.2	0.041	591.2	0.045				591.2	0.036	591.2	0.042	591.2	0.039	591.2	0.042	591.2	0.046
591.4	0.031	591.4	0.033	591.4	0.036	591.4	0.041	591.4	0.045				591.4	0.036	591.4	0.042	591.4	0.039	591.4	0.042	591.4	0.046
591.6	0.031	591.6	0.033	591.6	0.036	591.6	0.04	591.6	0.045				591.6	0.036	591.6	0.042	591.6	0.039	591.6	0.041	591.6	0.046
591.8	0.031	591.8	0.033	591.8	0.036	591.8	0.04	591.8	0.045				591.8	0.035	591.8	0.042	591.8	0.039	591.8	0.041	591.8	0.046
592	0.031	592	0.033	592	0.035	592	0.04	592	0.044				592	0.035	592	0.042	592	0.038	592	0.041	592	0.046
592.2	0.03	592.2	0.033	592.2	0.035	592.2	0.04	592.2	0.044				592.2	0.035	592.2	0.041	592.2	0.038	592.2	0.041	592.2	0.046
592.4	0.03	592.4	0.033	592.4	0.035	592.4	0.04	592.4	0.044				592.4	0.035	592.4	0.041	592.4	0.038	592.4	0.041	592.4	0.046
592.6	0.03	592.6	0.033	592.6	0.035	592.6	0.04	592.6	0.044				592.6	0.035	592.6	0.041	592.6	0.038	592.6	0.041	592.6	0.046
592.8	0.03	592.8	0.033	592.8	0.035	592.8	0.04	592.8	0.044				592.8	0.035	592.8	0.041	592.8	0.038	592.8	0.041	592.8	0.045
593	0.03	593	0.033	593	0.035	593	0.04	593	0.044				593	0.035	593	0.041	593	0.038	593	0.041	593	0.045
593.2	0.03	593.2	0.032	593.2	0.035	593.2	0.039	593.2	0.044				593.2	0.035	593.2	0.041	593.2	0.038	593.2	0.041	593.2	0.045
593.4	0.03	593.4	0.032	593.4	0.035	593.4	0.039	593.4	0.044				593.4	0.035	593.4	0.041	593.4	0.038	593.4	0.04	593.4	0.045
593.6	0.03	593.6	0.032	593.6	0.035	593.6	0.039	593.6	0.043				593.6	0.035	593.6	0.041	593.6	0.038	593.6	0.04	593.6	0.045
593.8	0.03	593.8	0.032	593.8	0.035	593.8	0.039	593.8	0.043				593.8	0.035	593.8	0.041	593.8	0.038	593.8	0.04	593.8	0.045
594	0.03	594	0.032	594	0.035	594	0.039	594	0.043				594	0.034	594	0.041	594	0.037	594	0.04	594	0.045
594.2	0.03	594.2	0.032	594.2	0.034	594.2	0.039	594.2	0.043				594.2	0.034	594.2	0.041	594.2	0.037	594.2	0.04	594.2	0.045
594.4	0.029	594.4	0.032	594.4	0.034	594.4	0.039	594.4	0.043				594.4	0.034	594.4	0.04	594.4	0.037	594.4	0.04	594.4	0.045
594.6	0.029	594.6	0.032	594.6	0.034	594.6	0.039	594.6	0.042				594.6	0.034	594.6	0.04	594.6	0.037	594.6	0.04	594.6	0.044
594.8	0.029	594.8	0.032	594.8	0.034	594.8	0.039	594.8	0.042				594.8	0.034	594.8	0.04	594.8	0.037	594.8	0.04	594.8	0.044
595	0.029	595	0.032	595	0.034	595	0.038	595	0.042				595	0.034	595	0.04	595	0.037	595	0.04	595	0.044
595.2	0.029	595.2	0.032	595.2	0.034	595.2	0.038	595.2	0.042				595.2	0.034	595.2	0.04	595.2	0.037	595.2	0.04	595.2	0.044
595.4	0.029	595.4	0.031	595.4	0.034	595.4	0.038	595.4	0.042				595.4	0.034	595.4	0.04	595.4	0.037	595.4	0.039	595.4	0.044
595.6	0.029	595.6	0.031	595.6	0.034	595.6	0.038	595.6	0.042				595.6	0.034	595.6	0.04	595.6	0.037	595.6	0.039	595.6	0.044
595.8	0.029	595.8	0.031	595.8	0.034	595.8	0.038	595.8	0.042				595.8	0.034	595.8	0.039	595.8	0.037	595.8	0.039	595.8	0.044
596	0.029	596	0.031	596	0.033	596	0.038	596	0.042				596	0.033	596	0.039	596	0.036	596	0.039	596	0.044
596.2	0.029	596.2	0.031	596.2	0.033	596.2	0.038	596.2	0.042				596.2	0.033	596.2	0.039	596.2	0.036	596.2	0.039	596.2	0.044
596.4	0.028	596.4	0.031	596.4	0.033	596.4	0.038	596.4	0.041				596.4	0.033	596.4	0.039	596.4	0.036	596.4	0.039	596.4	0.043
596.6	0.028	596.6	0.031	596.6	0.033	596.6	0.038	596.6	0.041				596.6	0.033	596.6	0.039	596.6	0.036	596.6	0.039	596.6	0.043
596.8	0.028	596.8	0.031	596.8	0.033	596.8	0.038	596.8	0.041				596.8	0.033	596.8	0.039	596.8	0.036	596.8	0.039	596.8	0.043
597	0.028	597	0.031	597	0.033	597	0.037	597	0.041				597	0.033	597	0.039	597	0.036	597	0.039	597	0.043
597.2	0.028	597.2	0.031	597.2	0.033	597.2	0.037	597.2	0.041				597.2	0.033	597.2	0.039	597.2	0.036	597.2	0.039	597.2	0.043
597.4	0.028	597.4	0.031	597.4	0.033	597.4	0.037	597.4	0.041				597.4	0.033	597.4	0.039	597.4	0.036	597.4	0.039	597.4	0.043
597.6	0.028	597.6	0.031	597.6	0.033	597.6	0.037	597.6	0.041				597.6	0.033	597.6	0.039	597.6	0.036	597.6	0.039	597.6	0.043
597.8	0.028	597.8	0.03	597.8	0.033	597.8	0.037	597.8	0.04				597.8	0.033	597.8	0.039	597.8	0.036	597.8	0.039	597.8	0.043
598	0.028	598	0.03	598	0.033	598	0.037	598	0.04				598	0.033	598	0.038	598	0.036	598	0.038	598	0.043
598.2	0.028	598.2	0.03	598.2	0.032	598.2	0.037	598.2	0.04				598.2	0.033	598.2	0.038	598.2	0.036	598.2	0.038	598.2	0.043
598.4	0.028	598.4	0.03	598.4	0.032	598.4	0.037	598.4	0.04				598.4	0.033	598.4	0.038	598.4	0.035	598.4	0.038	598.4	0.043
598.6	0.028	598.6	0.03	598.6	0.032	598.6	0.037	598.6	0.04				598.6	0.032	598.6	0.038	598.6	0.035	598.6	0.038	598.6	0.042
598.8	0.028	598.8	0.03	598.8	0.032	598.8	0.036	598.8	0.04				598.8	0.032	598.8	0.038	598.8	0.035	598.8	0.038	598.8	0.042
599	0.027	599	0.03	599	0.032	599	0.036	599	0.04				599	0.032	599	0.038	599	0.035	599	0.038	599	0.042
599.2	0.027	599.2	0.03	599.2	0.032	599.2	0.036	599.2	0.04				599.2	0.032	599.2	0.038	599.2	0.035	599.2	0.038	599.2	0.042
599.4	0.027	599.4	0.03	599.4	0.032	599.4	0.036	599.4	0.04				599.4	0.032	599.4	0.038	599.4	0.035	599.4	0.038	599.4	0.042
599.6	0.027	599.6	0.03	599.6	0.032	599.6	0.036	599.6	0.039				599.6	0.032	599.6	0.038	599.6	0.035	599.6	0.038	599.6	0.042
599.8	0.027	599.8	0.029	599.8	0.031	599.8	0.036	599.8	0.039				599.8	0.032	599.8	0.037	599.8	0.035	599.8	0.038	599.8	0.042
600	0.027	600	0.029	600	0.031	600	0.036	600	0.039				600	0.032	600	0.037	600	0.035	600	0.037	600	0.042

## Sheet: Temperature
OLE								RLE
20 ˚C		40 ˚C		80 ˚C				20 ˚C		40 ˚C		80 ˚C
Wavelength nm.	Abs.	Wavelength nm.	Abs.	Wavelength nm.	Abs.			Wavelength nm.	Abs.	Wavelength nm.	Abs.	Wavelength nm.	Abs.
300	0.356	300	0.474	300	0.629			300	0.421	300	0.536	300	0.591
300.2	0.355	300.2	0.473	300.2	0.628			300.2	0.421	300.2	0.535	300.2	0.59
300.4	0.354	300.4	0.471	300.4	0.626			300.4	0.419	300.4	0.533	300.4	0.589
300.6	0.353	300.6	0.469	300.6	0.624			300.6	0.418	300.6	0.531	300.6	0.586
300.8	0.352	300.8	0.467	300.8	0.621			300.8	0.416	300.8	0.529	300.8	0.584
301	0.35	301	0.464	301	0.619			301	0.415	301	0.527	301	0.582
301.2	0.349	301.2	0.462	301.2	0.617			301.2	0.413	301.2	0.524	301.2	0.579
301.4	0.348	301.4	0.46	301.4	0.614			301.4	0.411	301.4	0.522	301.4	0.577
301.6	0.346	301.6	0.457	301.6	0.612			301.6	0.409	301.6	0.52	301.6	0.575
301.8	0.345	301.8	0.455	301.8	0.609			301.8	0.407	301.8	0.517	301.8	0.573
302	0.343	302	0.453	302	0.607			302	0.406	302	0.515	302	0.57
302.2	0.342	302.2	0.451	302.2	0.604			302.2	0.404	302.2	0.513	302.2	0.568
302.4	0.341	302.4	0.448	302.4	0.602			302.4	0.402	302.4	0.51	302.4	0.566
302.6	0.339	302.6	0.446	302.6	0.599			302.6	0.401	302.6	0.508	302.6	0.564
302.8	0.338	302.8	0.444	302.8	0.597			302.8	0.399	302.8	0.506	302.8	0.562
303	0.337	303	0.442	303	0.595			303	0.398	303	0.504	303	0.56
303.2	0.336	303.2	0.44	303.2	0.592			303.2	0.396	303.2	0.502	303.2	0.558
303.4	0.335	303.4	0.437	303.4	0.59			303.4	0.394	303.4	0.5	303.4	0.556
303.6	0.333	303.6	0.436	303.6	0.588			303.6	0.393	303.6	0.498	303.6	0.554
303.8	0.332	303.8	0.433	303.8	0.585			303.8	0.391	303.8	0.496	303.8	0.552
304	0.331	304	0.431	304	0.583			304	0.39	304	0.494	304	0.549
304.2	0.33	304.2	0.429	304.2	0.581			304.2	0.388	304.2	0.492	304.2	0.548
304.4	0.328	304.4	0.427	304.4	0.578			304.4	0.386	304.4	0.489	304.4	0.546
304.6	0.327	304.6	0.425	304.6	0.576			304.6	0.385	304.6	0.487	304.6	0.543
304.8	0.326	304.8	0.423	304.8	0.574			304.8	0.383	304.8	0.485	304.8	0.542
305	0.325	305	0.421	305	0.572			305	0.382	305	0.483	305	0.539
305.2	0.324	305.2	0.419	305.2	0.57			305.2	0.38	305.2	0.481	305.2	0.537
305.4	0.323	305.4	0.417	305.4	0.567			305.4	0.379	305.4	0.479	305.4	0.536
305.6	0.322	305.6	0.415	305.6	0.565			305.6	0.377	305.6	0.477	305.6	0.533
305.8	0.321	305.8	0.413	305.8	0.562			305.8	0.375	305.8	0.475	305.8	0.532
306	0.32	306	0.41	306	0.56			306	0.373	306	0.472	306	0.53
306.2	0.318	306.2	0.408	306.2	0.557			306.2	0.372	306.2	0.47	306.2	0.527
306.4	0.317	306.4	0.406	306.4	0.555			306.4	0.37	306.4	0.469	306.4	0.526
306.6	0.316	306.6	0.404	306.6	0.553			306.6	0.369	306.6	0.467	306.6	0.524
306.8	0.315	306.8	0.403	306.8	0.551			306.8	0.367	306.8	0.465	306.8	0.522
307	0.314	307	0.401	307	0.549			307	0.366	307	0.463	307	0.52
307.2	0.313	307.2	0.399	307.2	0.547			307.2	0.364	307.2	0.462	307.2	0.519
307.4	0.311	307.4	0.397	307.4	0.545			307.4	0.363	307.4	0.46	307.4	0.517
307.6	0.31	307.6	0.396	307.6	0.543			307.6	0.361	307.6	0.458	307.6	0.515
307.8	0.309	307.8	0.394	307.8	0.541			307.8	0.36	307.8	0.456	307.8	0.514
308	0.308	308	0.392	308	0.539			308	0.358	308	0.454	308	0.512
308.2	0.307	308.2	0.39	308.2	0.537			308.2	0.357	308.2	0.452	308.2	0.51
308.4	0.306	308.4	0.388	308.4	0.535			308.4	0.356	308.4	0.45	308.4	0.509
308.6	0.305	308.6	0.387	308.6	0.534			308.6	0.355	308.6	0.449	308.6	0.507
308.8	0.304	308.8	0.385	308.8	0.532			308.8	0.353	308.8	0.447	308.8	0.505
309	0.303	309	0.384	309	0.53			309	0.352	309	0.446	309	0.504
309.2	0.302	309.2	0.382	309.2	0.528			309.2	0.351	309.2	0.444	309.2	0.502
309.4	0.301	309.4	0.38	309.4	0.526			309.4	0.35	309.4	0.442	309.4	0.5
309.6	0.3	309.6	0.378	309.6	0.524			309.6	0.348	309.6	0.441	309.6	0.499
309.8	0.299	309.8	0.377	309.8	0.522			309.8	0.347	309.8	0.439	309.8	0.498
310	0.298	310	0.375	310	0.521			310	0.345	310	0.438	310	0.496
310.2	0.297	310.2	0.373	310.2	0.519			310.2	0.344	310.2	0.436	310.2	0.495
310.4	0.296	310.4	0.372	310.4	0.517			310.4	0.343	310.4	0.435	310.4	0.493
310.6	0.295	310.6	0.37	310.6	0.515			310.6	0.342	310.6	0.433	310.6	0.491
310.8	0.294	310.8	0.369	310.8	0.514			310.8	0.34	310.8	0.431	310.8	0.49
311	0.293	311	0.367	311	0.512			311	0.339	311	0.43	311	0.488
311.2	0.292	311.2	0.366	311.2	0.511			311.2	0.338	311.2	0.428	311.2	0.486
311.4	0.292	311.4	0.365	311.4	0.509			311.4	0.337	311.4	0.427	311.4	0.485
311.6	0.291	311.6	0.363	311.6	0.508			311.6	0.336	311.6	0.425	311.6	0.484
311.8	0.29	311.8	0.362	311.8	0.506			311.8	0.334	311.8	0.424	311.8	0.483
312	0.289	312	0.361	312	0.505			312	0.333	312	0.423	312	0.481
312.2	0.288	312.2	0.36	312.2	0.503			312.2	0.332	312.2	0.421	312.2	0.48
312.4	0.287	312.4	0.358	312.4	0.502			312.4	0.331	312.4	0.42	312.4	0.479
312.6	0.286	312.6	0.357	312.6	0.501			312.6	0.33	312.6	0.419	312.6	0.477
312.8	0.286	312.8	0.356	312.8	0.5			312.8	0.329	312.8	0.418	312.8	0.476
313	0.285	313	0.355	313	0.499			313	0.328	313	0.417	313	0.475
313.2	0.285	313.2	0.354	313.2	0.498			313.2	0.327	313.2	0.415	313.2	0.474
313.4	0.284	313.4	0.353	313.4	0.496			313.4	0.326	313.4	0.414	313.4	0.472
313.6	0.284	313.6	0.352	313.6	0.495			313.6	0.326	313.6	0.413	313.6	0.471
313.8	0.283	313.8	0.351	313.8	0.494			313.8	0.325	313.8	0.412	313.8	0.47
314	0.283	314	0.35	314	0.493			314	0.324	314	0.411	314	0.469
314.2	0.282	314.2	0.349	314.2	0.491			314.2	0.323	314.2	0.41	314.2	0.468
314.4	0.282	314.4	0.348	314.4	0.49			314.4	0.322	314.4	0.409	314.4	0.467
314.6	0.281	314.6	0.347	314.6	0.489			314.6	0.321	314.6	0.408	314.6	0.466
314.8	0.281	314.8	0.346	314.8	0.488			314.8	0.32	314.8	0.407	314.8	0.465
315	0.28	315	0.345	315	0.487			315	0.32	315	0.406	315	0.464
315.2	0.279	315.2	0.344	315.2	0.486			315.2	0.319	315.2	0.405	315.2	0.463
315.4	0.279	315.4	0.343	315.4	0.485			315.4	0.318	315.4	0.404	315.4	0.462
315.6	0.279	315.6	0.342	315.6	0.484			315.6	0.318	315.6	0.402	315.6	0.461
315.8	0.278	315.8	0.342	315.8	0.483			315.8	0.317	315.8	0.401	315.8	0.46
316	0.278	316	0.341	316	0.483			316	0.317	316	0.4	316	0.459
316.2	0.278	316.2	0.34	316.2	0.482			316.2	0.316	316.2	0.4	316.2	0.458
316.4	0.277	316.4	0.34	316.4	0.481			316.4	0.315	316.4	0.399	316.4	0.457
316.6	0.277	316.6	0.339	316.6	0.48			316.6	0.315	316.6	0.399	316.6	0.457
316.8	0.277	316.8	0.338	316.8	0.479			316.8	0.314	316.8	0.398	316.8	0.456
317	0.277	317	0.338	317	0.479			317	0.314	317	0.397	317	0.455
317.2	0.276	317.2	0.337	317.2	0.478			317.2	0.313	317.2	0.396	317.2	0.454
317.4	0.276	317.4	0.336	317.4	0.477			317.4	0.313	317.4	0.396	317.4	0.454
317.6	0.276	317.6	0.336	317.6	0.476			317.6	0.312	317.6	0.395	317.6	0.453
317.8	0.276	317.8	0.335	317.8	0.476			317.8	0.312	317.8	0.394	317.8	0.452
318	0.276	318	0.335	318	0.475			318	0.312	318	0.393	318	0.452
318.2	0.276	318.2	0.335	318.2	0.475			318.2	0.311	318.2	0.393	318.2	0.451
318.4	0.276	318.4	0.334	318.4	0.474			318.4	0.311	318.4	0.392	318.4	0.45
318.6	0.275	318.6	0.334	318.6	0.474			318.6	0.31	318.6	0.391	318.6	0.449
318.8	0.275	318.8	0.334	318.8	0.473			318.8	0.31	318.8	0.391	318.8	0.449
319	0.275	319	0.333	319	0.473			319	0.309	319	0.39	319	0.448
319.2	0.275	319.2	0.333	319.2	0.472			319.2	0.309	319.2	0.39	319.2	0.448
319.4	0.275	319.4	0.332	319.4	0.472			319.4	0.309	319.4	0.389	319.4	0.447
319.6	0.275	319.6	0.332	319.6	0.472			319.6	0.309	319.6	0.389	319.6	0.446
319.8	0.275	319.8	0.332	319.8	0.471			319.8	0.308	319.8	0.388	319.8	0.446
320	0.275	320	0.331	320	0.471			320	0.308	320	0.387	320	0.445
320.2	0.275	320.2	0.331	320.2	0.471			320.2	0.308	320.2	0.386	320.2	0.445
320.4	0.276	320.4	0.331	320.4	0.471			320.4	0.308	320.4	0.386	320.4	0.444
320.6	0.276	320.6	0.331	320.6	0.47			320.6	0.307	320.6	0.385	320.6	0.444
320.8	0.276	320.8	0.331	320.8	0.47			320.8	0.307	320.8	0.385	320.8	0.444
321	0.276	321	0.33	321	0.47			321	0.307	321	0.385	321	0.443
321.2	0.276	321.2	0.33	321.2	0.47			321.2	0.307	321.2	0.385	321.2	0.443
321.4	0.276	321.4	0.33	321.4	0.469			321.4	0.307	321.4	0.385	321.4	0.443
321.6	0.276	321.6	0.33	321.6	0.469			321.6	0.306	321.6	0.384	321.6	0.442
321.8	0.277	321.8	0.33	321.8	0.469			321.8	0.306	321.8	0.384	321.8	0.442
322	0.277	322	0.33	322	0.469			322	0.306	322	0.384	322	0.441
322.2	0.277	322.2	0.329	322.2	0.469			322.2	0.306	322.2	0.383	322.2	0.441
322.4	0.277	322.4	0.33	322.4	0.469			322.4	0.306	322.4	0.383	322.4	0.441
322.6	0.277	322.6	0.329	322.6	0.469			322.6	0.306	322.6	0.383	322.6	0.441
322.8	0.277	322.8	0.329	322.8	0.469			322.8	0.306	322.8	0.383	322.8	0.441
323	0.277	323	0.329	323	0.468			323	0.306	323	0.383	323	0.441
323.2	0.277	323.2	0.329	323.2	0.468			323.2	0.306	323.2	0.382	323.2	0.441
323.4	0.278	323.4	0.329	323.4	0.468			323.4	0.305	323.4	0.382	323.4	0.44
323.6	0.278	323.6	0.329	323.6	0.468			323.6	0.305	323.6	0.382	323.6	0.44
323.8	0.278	323.8	0.33	323.8	0.468			323.8	0.305	323.8	0.381	323.8	0.44
324	0.278	324	0.33	324	0.469			324	0.305	324	0.381	324	0.439
324.2	0.279	324.2	0.33	324.2	0.469			324.2	0.305	324.2	0.381	324.2	0.439
324.4	0.279	324.4	0.33	324.4	0.469			324.4	0.305	324.4	0.381	324.4	0.439
324.6	0.279	324.6	0.331	324.6	0.469			324.6	0.305	324.6	0.381	324.6	0.438
324.8	0.28	324.8	0.331	324.8	0.469			324.8	0.305	324.8	0.381	324.8	0.438
325	0.28	325	0.331	325	0.47			325	0.305	325	0.381	325	0.438
325.2	0.28	325.2	0.332	325.2	0.47			325.2	0.305	325.2	0.38	325.2	0.438
325.4	0.28	325.4	0.332	325.4	0.47			325.4	0.305	325.4	0.38	325.4	0.438
325.6	0.281	325.6	0.332	325.6	0.47			325.6	0.305	325.6	0.38	325.6	0.438
325.8	0.281	325.8	0.333	325.8	0.47			325.8	0.305	325.8	0.38	325.8	0.438
326	0.281	326	0.333	326	0.47			326	0.305	326	0.38	326	0.438
326.2	0.281	326.2	0.333	326.2	0.471			326.2	0.305	326.2	0.38	326.2	0.438
326.4	0.282	326.4	0.334	326.4	0.471			326.4	0.305	326.4	0.38	326.4	0.438
326.6	0.282	326.6	0.334	326.6	0.471			326.6	0.305	326.6	0.38	326.6	0.437
326.8	0.282	326.8	0.335	326.8	0.471			326.8	0.305	326.8	0.38	326.8	0.437
327	0.283	327	0.335	327	0.472			327	0.305	327	0.38	327	0.438
327.2	0.283	327.2	0.336	327.2	0.472			327.2	0.305	327.2	0.38	327.2	0.438
327.4	0.283	327.4	0.336	327.4	0.473			327.4	0.305	327.4	0.38	327.4	0.438
327.6	0.283	327.6	0.337	327.6	0.473			327.6	0.305	327.6	0.38	327.6	0.438
327.8	0.283	327.8	0.337	327.8	0.473			327.8	0.305	327.8	0.38	327.8	0.438
328	0.284	328	0.338	328	0.474			328	0.305	328	0.381	328	0.438
328.2	0.284	328.2	0.338	328.2	0.474			328.2	0.305	328.2	0.381	328.2	0.438
328.4	0.284	328.4	0.339	328.4	0.475			328.4	0.305	328.4	0.381	328.4	0.439
328.6	0.285	328.6	0.34	328.6	0.475			328.6	0.305	328.6	0.382	328.6	0.439
328.8	0.285	328.8	0.34	328.8	0.476			328.8	0.305	328.8	0.382	328.8	0.439
329	0.285	329	0.341	329	0.476			329	0.306	329	0.382	329	0.439
329.2	0.286	329.2	0.342	329.2	0.477			329.2	0.306	329.2	0.383	329.2	0.44
329.4	0.286	329.4	0.343	329.4	0.477			329.4	0.306	329.4	0.383	329.4	0.44
329.6	0.286	329.6	0.344	329.6	0.478			329.6	0.306	329.6	0.383	329.6	0.441
329.8	0.286	329.8	0.345	329.8	0.479			329.8	0.306	329.8	0.383	329.8	0.441
330	0.287	330	0.346	330	0.48			330	0.306	330	0.384	330	0.441
330.2	0.287	330.2	0.347	330.2	0.481			330.2	0.306	330.2	0.384	330.2	0.441
330.4	0.287	330.4	0.348	330.4	0.482			330.4	0.306	330.4	0.384	330.4	0.441
330.6	0.288	330.6	0.349	330.6	0.482			330.6	0.306	330.6	0.385	330.6	0.442
330.8	0.288	330.8	0.35	330.8	0.483			330.8	0.306	330.8	0.385	330.8	0.442
331	0.289	331	0.351	331	0.484			331	0.305	331	0.386	331	0.443
331.2	0.289	331.2	0.352	331.2	0.485			331.2	0.305	331.2	0.386	331.2	0.443
331.4	0.289	331.4	0.353	331.4	0.486			331.4	0.305	331.4	0.387	331.4	0.443
331.6	0.289	331.6	0.353	331.6	0.487			331.6	0.305	331.6	0.387	331.6	0.443
331.8	0.289	331.8	0.355	331.8	0.488			331.8	0.305	331.8	0.388	331.8	0.444
332	0.289	332	0.356	332	0.488			332	0.305	332	0.388	332	0.445
332.2	0.29	332.2	0.357	332.2	0.489			332.2	0.305	332.2	0.389	332.2	0.445
332.4	0.29	332.4	0.358	332.4	0.49			332.4	0.305	332.4	0.389	332.4	0.446
332.6	0.29	332.6	0.359	332.6	0.491			332.6	0.306	332.6	0.39	332.6	0.447
332.8	0.29	332.8	0.361	332.8	0.492			332.8	0.306	332.8	0.39	332.8	0.447
333	0.291	333	0.362	333	0.493			333	0.306	333	0.391	333	0.448
333.2	0.291	333.2	0.363	333.2	0.494			333.2	0.306	333.2	0.392	333.2	0.448
333.4	0.291	333.4	0.365	333.4	0.495			333.4	0.306	333.4	0.393	333.4	0.449
333.6	0.292	333.6	0.366	333.6	0.497			333.6	0.306	333.6	0.394	333.6	0.449
333.8	0.292	333.8	0.368	333.8	0.498			333.8	0.306	333.8	0.395	333.8	0.45
334	0.292	334	0.369	334	0.499			334	0.306	334	0.395	334	0.451
334.2	0.293	334.2	0.371	334.2	0.5			334.2	0.306	334.2	0.396	334.2	0.452
334.4	0.293	334.4	0.372	334.4	0.502			334.4	0.306	334.4	0.397	334.4	0.453
334.6	0.293	334.6	0.373	334.6	0.503			334.6	0.306	334.6	0.397	334.6	0.454
334.8	0.294	334.8	0.375	334.8	0.504			334.8	0.306	334.8	0.398	334.8	0.454
335	0.294	335	0.377	335	0.506			335	0.306	335	0.399	335	0.455
335.2	0.294	335.2	0.378	335.2	0.507			335.2	0.306	335.2	0.4	335.2	0.457
335.4	0.294	335.4	0.38	335.4	0.508			335.4	0.306	335.4	0.401	335.4	0.457
335.6	0.295	335.6	0.381	335.6	0.51			335.6	0.306	335.6	0.402	335.6	0.458
335.8	0.295	335.8	0.383	335.8	0.511			335.8	0.306	335.8	0.403	335.8	0.459
336	0.296	336	0.385	336	0.513			336	0.306	336	0.404	336	0.46
336.2	0.296	336.2	0.386	336.2	0.515			336.2	0.306	336.2	0.405	336.2	0.461
336.4	0.296	336.4	0.388	336.4	0.516			336.4	0.306	336.4	0.407	336.4	0.462
336.6	0.296	336.6	0.39	336.6	0.518			336.6	0.306	336.6	0.408	336.6	0.463
336.8	0.296	336.8	0.392	336.8	0.52			336.8	0.306	336.8	0.409	336.8	0.464
337	0.297	337	0.394	337	0.521			337	0.306	337	0.41	337	0.465
337.2	0.297	337.2	0.395	337.2	0.523			337.2	0.306	337.2	0.411	337.2	0.467
337.4	0.297	337.4	0.397	337.4	0.525			337.4	0.307	337.4	0.413	337.4	0.468
337.6	0.297	337.6	0.398	337.6	0.526			337.6	0.307	337.6	0.414	337.6	0.469
337.8	0.297	337.8	0.4	337.8	0.528			337.8	0.306	337.8	0.415	337.8	0.47
338	0.298	338	0.402	338	0.53			338	0.307	338	0.416	338	0.472
338.2	0.298	338.2	0.404	338.2	0.532			338.2	0.307	338.2	0.417	338.2	0.473
338.4	0.299	338.4	0.406	338.4	0.534			338.4	0.307	338.4	0.418	338.4	0.474
338.6	0.299	338.6	0.408	338.6	0.536			338.6	0.307	338.6	0.419	338.6	0.476
338.8	0.299	338.8	0.41	338.8	0.538			338.8	0.307	338.8	0.421	338.8	0.477
339	0.3	339	0.412	339	0.54			339	0.307	339	0.423	339	0.479
339.2	0.3	339.2	0.414	339.2	0.543			339.2	0.307	339.2	0.424	339.2	0.48
339.4	0.301	339.4	0.416	339.4	0.545			339.4	0.307	339.4	0.426	339.4	0.482
339.6	0.301	339.6	0.417	339.6	0.547			339.6	0.307	339.6	0.427	339.6	0.483
339.8	0.301	339.8	0.419	339.8	0.549			339.8	0.307	339.8	0.429	339.8	0.485
340	0.302	340	0.421	340	0.551			340	0.307	340	0.43	340	0.486
340.2	0.302	340.2	0.423	340.2	0.553			340.2	0.307	340.2	0.431	340.2	0.488
340.4	0.302	340.4	0.424	340.4	0.555			340.4	0.307	340.4	0.433	340.4	0.49
340.6	0.302	340.6	0.426	340.6	0.558			340.6	0.307	340.6	0.435	340.6	0.491
340.8	0.303	340.8	0.428	340.8	0.56			340.8	0.308	340.8	0.436	340.8	0.493
341	0.303	341	0.43	341	0.562			341	0.308	341	0.438	341	0.495
341.2	0.303	341.2	0.431	341.2	0.564			341.2	0.308	341.2	0.439	341.2	0.496
341.4	0.304	341.4	0.433	341.4	0.567			341.4	0.308	341.4	0.441	341.4	0.498
341.6	0.304	341.6	0.435	341.6	0.569			341.6	0.308	341.6	0.443	341.6	0.5
341.8	0.304	341.8	0.437	341.8	0.572			341.8	0.308	341.8	0.445	341.8	0.502
342	0.304	342	0.439	342	0.575			342	0.308	342	0.447	342	0.503
342.2	0.304	342.2	0.441	342.2	0.577			342.2	0.309	342.2	0.449	342.2	0.505
342.4	0.305	342.4	0.443	342.4	0.58			342.4	0.309	342.4	0.45	342.4	0.507
342.6	0.305	342.6	0.445	342.6	0.582			342.6	0.309	342.6	0.452	342.6	0.509
342.8	0.306	342.8	0.447	342.8	0.585			342.8	0.309	342.8	0.454	342.8	0.512
343	0.306	343	0.449	343	0.587			343	0.309	343	0.456	343	0.514
343.2	0.306	343.2	0.451	343.2	0.59			343.2	0.309	343.2	0.458	343.2	0.516
343.4	0.307	343.4	0.453	343.4	0.592			343.4	0.309	343.4	0.46	343.4	0.518
343.6	0.307	343.6	0.455	343.6	0.595			343.6	0.309	343.6	0.462	343.6	0.52
343.8	0.308	343.8	0.456	343.8	0.597			343.8	0.309	343.8	0.464	343.8	0.522
344	0.308	344	0.458	344	0.6			344	0.309	344	0.465	344	0.524
344.2	0.308	344.2	0.46	344.2	0.603			344.2	0.309	344.2	0.468	344.2	0.525
344.4	0.308	344.4	0.461	344.4	0.606			344.4	0.309	344.4	0.47	344.4	0.528
344.6	0.309	344.6	0.463	344.6	0.608			344.6	0.309	344.6	0.472	344.6	0.53
344.8	0.309	344.8	0.465	344.8	0.611			344.8	0.309	344.8	0.474	344.8	0.532
345	0.309	345	0.467	345	0.614			345	0.309	345	0.476	345	0.535
345.2	0.31	345.2	0.469	345.2	0.617			345.2	0.309	345.2	0.478	345.2	0.537
345.4	0.31	345.4	0.471	345.4	0.619			345.4	0.309	345.4	0.48	345.4	0.539
345.6	0.31	345.6	0.472	345.6	0.622			345.6	0.309	345.6	0.482	345.6	0.541
345.8	0.31	345.8	0.474	345.8	0.625			345.8	0.309	345.8	0.484	345.8	0.544
346	0.31	346	0.475	346	0.628			346	0.31	346	0.486	346	0.546
346.2	0.311	346.2	0.477	346.2	0.631			346.2	0.31	346.2	0.488	346.2	0.548
346.4	0.311	346.4	0.479	346.4	0.634			346.4	0.31	346.4	0.49	346.4	0.551
346.6	0.312	346.6	0.481	346.6	0.637			346.6	0.31	346.6	0.492	346.6	0.553
346.8	0.312	346.8	0.483	346.8	0.639			346.8	0.31	346.8	0.494	346.8	0.556
347	0.312	347	0.485	347	0.642			347	0.31	347	0.496	347	0.558
347.2	0.313	347.2	0.487	347.2	0.646			347.2	0.311	347.2	0.499	347.2	0.561
347.4	0.313	347.4	0.489	347.4	0.649			347.4	0.311	347.4	0.501	347.4	0.563
347.6	0.313	347.6	0.49	347.6	0.652			347.6	0.31	347.6	0.504	347.6	0.566
347.8	0.314	347.8	0.492	347.8	0.655			347.8	0.311	347.8	0.506	347.8	0.569
348	0.314	348	0.493	348	0.658			348	0.311	348	0.508	348	0.571
348.2	0.314	348.2	0.495	348.2	0.661			348.2	0.311	348.2	0.51	348.2	0.574
348.4	0.314	348.4	0.496	348.4	0.664			348.4	0.311	348.4	0.512	348.4	0.576
348.6	0.314	348.6	0.498	348.6	0.666			348.6	0.311	348.6	0.514	348.6	0.578
348.8	0.315	348.8	0.5	348.8	0.669			348.8	0.311	348.8	0.517	348.8	0.581
349	0.315	349	0.501	349	0.672			349	0.312	349	0.519	349	0.583
349.2	0.315	349.2	0.504	349.2	0.675			349.2	0.312	349.2	0.521	349.2	0.586
349.4	0.315	349.4	0.505	349.4	0.678			349.4	0.311	349.4	0.524	349.4	0.588
349.6	0.316	349.6	0.507	349.6	0.682			349.6	0.311	349.6	0.526	349.6	0.59
349.8	0.316	349.8	0.509	349.8	0.685			349.8	0.311	349.8	0.528	349.8	0.593
350	0.316	350	0.51	350	0.688			350	0.311	350	0.53	350	0.596
350.2	0.316	350.2	0.512	350.2	0.691			350.2	0.311	350.2	0.532	350.2	0.598
350.4	0.317	350.4	0.514	350.4	0.694			350.4	0.311	350.4	0.534	350.4	0.601
350.6	0.317	350.6	0.515	350.6	0.697			350.6	0.312	350.6	0.536	350.6	0.604
350.8	0.317	350.8	0.517	350.8	0.7			350.8	0.312	350.8	0.539	350.8	0.606
351	0.318	351	0.518	351	0.703			351	0.312	351	0.541	351	0.608
351.2	0.318	351.2	0.521	351.2	0.706			351.2	0.312	351.2	0.543	351.2	0.611
351.4	0.318	351.4	0.522	351.4	0.709			351.4	0.312	351.4	0.546	351.4	0.614
351.6	0.318	351.6	0.523	351.6	0.713			351.6	0.312	351.6	0.548	351.6	0.617
351.8	0.319	351.8	0.525	351.8	0.716			351.8	0.313	351.8	0.55	351.8	0.62
352	0.319	352	0.526	352	0.719			352	0.313	352	0.553	352	0.622
352.2	0.319	352.2	0.528	352.2	0.722			352.2	0.313	352.2	0.555	352.2	0.625
352.4	0.319	352.4	0.53	352.4	0.725			352.4	0.313	352.4	0.557	352.4	0.628
352.6	0.319	352.6	0.532	352.6	0.728			352.6	0.313	352.6	0.56	352.6	0.631
352.8	0.319	352.8	0.534	352.8	0.731			352.8	0.313	352.8	0.562	352.8	0.634
353	0.319	353	0.536	353	0.735			353	0.313	353	0.565	353	0.637
353.2	0.32	353.2	0.538	353.2	0.738			353.2	0.313	353.2	0.568	353.2	0.64
353.4	0.32	353.4	0.539	353.4	0.742			353.4	0.314	353.4	0.57	353.4	0.643
353.6	0.32	353.6	0.541	353.6	0.745			353.6	0.314	353.6	0.572	353.6	0.645
353.8	0.321	353.8	0.542	353.8	0.748			353.8	0.314	353.8	0.575	353.8	0.648
354	0.321	354	0.544	354	0.751			354	0.314	354	0.577	354	0.651
354.2	0.322	354.2	0.546	354.2	0.753			354.2	0.314	354.2	0.579	354.2	0.654
354.4	0.322	354.4	0.547	354.4	0.757			354.4	0.314	354.4	0.581	354.4	0.657
354.6	0.322	354.6	0.549	354.6	0.76			354.6	0.314	354.6	0.584	354.6	0.66
354.8	0.322	354.8	0.551	354.8	0.764			354.8	0.314	354.8	0.586	354.8	0.663
355	0.322	355	0.552	355	0.767			355	0.314	355	0.589	355	0.666
355.2	0.322	355.2	0.554	355.2	0.77			355.2	0.314	355.2	0.591	355.2	0.669
355.4	0.322	355.4	0.556	355.4	0.774			355.4	0.314	355.4	0.593	355.4	0.672
355.6	0.323	355.6	0.557	355.6	0.777			355.6	0.315	355.6	0.596	355.6	0.675
355.8	0.323	355.8	0.559	355.8	0.781			355.8	0.315	355.8	0.598	355.8	0.679
356	0.323	356	0.561	356	0.784			356	0.315	356	0.601	356	0.682
356.2	0.323	356.2	0.564	356.2	0.788			356.2	0.315	356.2	0.603	356.2	0.685
356.4	0.324	356.4	0.565	356.4	0.792			356.4	0.315	356.4	0.606	356.4	0.688
356.6	0.324	356.6	0.567	356.6	0.795			356.6	0.316	356.6	0.608	356.6	0.691
356.8	0.324	356.8	0.568	356.8	0.798			356.8	0.316	356.8	0.611	356.8	0.694
357	0.324	357	0.57	357	0.801			357	0.316	357	0.613	357	0.697
357.2	0.325	357.2	0.572	357.2	0.805			357.2	0.316	357.2	0.616	357.2	0.7
357.4	0.325	357.4	0.573	357.4	0.808			357.4	0.316	357.4	0.618	357.4	0.703
357.6	0.325	357.6	0.575	357.6	0.811			357.6	0.316	357.6	0.621	357.6	0.707
357.8	0.325	357.8	0.577	357.8	0.815			357.8	0.316	357.8	0.623	357.8	0.71
358	0.325	358	0.579	358	0.819			358	0.316	358	0.626	358	0.713
358.2	0.325	358.2	0.581	358.2	0.822			358.2	0.316	358.2	0.628	358.2	0.717
358.4	0.326	358.4	0.582	358.4	0.826			358.4	0.316	358.4	0.631	358.4	0.72
358.6	0.326	358.6	0.584	358.6	0.829			358.6	0.317	358.6	0.634	358.6	0.723
358.8	0.326	358.8	0.586	358.8	0.833			358.8	0.317	358.8	0.636	358.8	0.726
359	0.326	359	0.588	359	0.837			359	0.317	359	0.64	359	0.729
359.2	0.326	359.2	0.589	359.2	0.839			359.2	0.316	359.2	0.642	359.2	0.732
359.4	0.327	359.4	0.591	359.4	0.843			359.4	0.316	359.4	0.645	359.4	0.735
359.6	0.327	359.6	0.593	359.6	0.847			359.6	0.316	359.6	0.648	359.6	0.738
359.8	0.329	359.8	0.595	359.8	0.85			359.8	0.316	359.8	0.65	359.8	0.743
360	0.33	360	0.597	360	0.855			360	0.316	360	0.652	360	0.747
360.2	0.332	360.2	0.599	360.2	0.858			360.2	0.315	360.2	0.654	360.2	0.751
360.4	0.333	360.4	0.601	360.4	0.862			360.4	0.315	360.4	0.656	360.4	0.756
360.6	0.333	360.6	0.603	360.6	0.865			360.6	0.315	360.6	0.659	360.6	0.759
360.8	0.333	360.8	0.605	360.8	0.868			360.8	0.315	360.8	0.661	360.8	0.763
361	0.333	361	0.606	361	0.872			361	0.315	361	0.664	361	0.766
361.2	0.333	361.2	0.608	361.2	0.875			361.2	0.315	361.2	0.667	361.2	0.77
361.4	0.332	361.4	0.61	361.4	0.879			361.4	0.315	361.4	0.67	361.4	0.773
361.6	0.332	361.6	0.612	361.6	0.883			361.6	0.315	361.6	0.672	361.6	0.776
361.8	0.332	361.8	0.613	361.8	0.886			361.8	0.315	361.8	0.675	361.8	0.78
362	0.333	362	0.615	362	0.89			362	0.315	362	0.678	362	0.783
362.2	0.333	362.2	0.617	362.2	0.894			362.2	0.316	362.2	0.681	362.2	0.787
362.4	0.333	362.4	0.619	362.4	0.898			362.4	0.316	362.4	0.684	362.4	0.79
362.6	0.333	362.6	0.621	362.6	0.902			362.6	0.316	362.6	0.687	362.6	0.794
362.8	0.333	362.8	0.623	362.8	0.905			362.8	0.316	362.8	0.69	362.8	0.798
363	0.333	363	0.625	363	0.909			363	0.316	363	0.693	363	0.801
363.2	0.333	363.2	0.626	363.2	0.912			363.2	0.316	363.2	0.695	363.2	0.804
363.4	0.333	363.4	0.628	363.4	0.916			363.4	0.316	363.4	0.698	363.4	0.808
363.6	0.333	363.6	0.63	363.6	0.92			363.6	0.316	363.6	0.701	363.6	0.811
363.8	0.333	363.8	0.631	363.8	0.923			363.8	0.316	363.8	0.704	363.8	0.815
364	0.333	364	0.633	364	0.927			364	0.316	364	0.706	364	0.818
364.2	0.333	364.2	0.635	364.2	0.93			364.2	0.316	364.2	0.709	364.2	0.821
364.4	0.333	364.4	0.637	364.4	0.934			364.4	0.316	364.4	0.712	364.4	0.825
364.6	0.333	364.6	0.638	364.6	0.938			364.6	0.316	364.6	0.715	364.6	0.828
364.8	0.333	364.8	0.641	364.8	0.942			364.8	0.316	364.8	0.718	364.8	0.832
365	0.332	365	0.642	365	0.946			365	0.316	365	0.721	365	0.836
365.2	0.332	365.2	0.644	365.2	0.95			365.2	0.316	365.2	0.724	365.2	0.84
365.4	0.332	365.4	0.646	365.4	0.954			365.4	0.316	365.4	0.728	365.4	0.844
365.6	0.332	365.6	0.648	365.6	0.958			365.6	0.316	365.6	0.731	365.6	0.847
365.8	0.332	365.8	0.65	365.8	0.962			365.8	0.317	365.8	0.734	365.8	0.851
366	0.332	366	0.652	366	0.966			366	0.317	366	0.737	366	0.855
366.2	0.332	366.2	0.653	366.2	0.97			366.2	0.317	366.2	0.74	366.2	0.859
366.4	0.332	366.4	0.655	366.4	0.974			366.4	0.317	366.4	0.744	366.4	0.863
366.6	0.332	366.6	0.657	366.6	0.978			366.6	0.317	366.6	0.747	366.6	0.866
366.8	0.332	366.8	0.659	366.8	0.982			366.8	0.317	366.8	0.75	366.8	0.87
367	0.332	367	0.661	367	0.987			367	0.317	367	0.753	367	0.874
367.2	0.331	367.2	0.663	367.2	0.991			367.2	0.317	367.2	0.756	367.2	0.878
367.4	0.331	367.4	0.665	367.4	0.995			367.4	0.317	367.4	0.759	367.4	0.882
367.6	0.331	367.6	0.667	367.6	1			367.6	0.317	367.6	0.762	367.6	0.886
367.8	0.331	367.8	0.668	367.8	1.004			367.8	0.318	367.8	0.766	367.8	0.89
368	0.331	368	0.67	368	1.008			368	0.318	368	0.769	368	0.894
368.2	0.331	368.2	0.672	368.2	1.012			368.2	0.318	368.2	0.772	368.2	0.897
368.4	0.331	368.4	0.674	368.4	1.016			368.4	0.318	368.4	0.775	368.4	0.901
368.6	0.331	368.6	0.676	368.6	1.02			368.6	0.318	368.6	0.779	368.6	0.905
368.8	0.331	368.8	0.677	368.8	1.024			368.8	0.318	368.8	0.781	368.8	0.908
369	0.331	369	0.679	369	1.028			369	0.318	369	0.785	369	0.912
369.2	0.33	369.2	0.681	369.2	1.033			369.2	0.318	369.2	0.788	369.2	0.916
369.4	0.33	369.4	0.683	369.4	1.037			369.4	0.318	369.4	0.791	369.4	0.919
369.6	0.33	369.6	0.685	369.6	1.041			369.6	0.318	369.6	0.794	369.6	0.923
369.8	0.33	369.8	0.687	369.8	1.046			369.8	0.318	369.8	0.798	369.8	0.927
370	0.329	370	0.688	370	1.05			370	0.319	370	0.801	370	0.931
370.2	0.329	370.2	0.69	370.2	1.055			370.2	0.319	370.2	0.805	370.2	0.935
370.4	0.329	370.4	0.692	370.4	1.059			370.4	0.319	370.4	0.808	370.4	0.939
370.6	0.329	370.6	0.694	370.6	1.064			370.6	0.319	370.6	0.811	370.6	0.943
370.8	0.329	370.8	0.696	370.8	1.068			370.8	0.319	370.8	0.815	370.8	0.947
371	0.329	371	0.698	371	1.073			371	0.319	371	0.818	371	0.951
371.2	0.329	371.2	0.7	371.2	1.076			371.2	0.319	371.2	0.821	371.2	0.955
371.4	0.329	371.4	0.702	371.4	1.081			371.4	0.319	371.4	0.824	371.4	0.959
371.6	0.329	371.6	0.703	371.6	1.085			371.6	0.319	371.6	0.827	371.6	0.962
371.8	0.329	371.8	0.705	371.8	1.09			371.8	0.319	371.8	0.83	371.8	0.966
372	0.328	372	0.707	372	1.095			372	0.319	372	0.834	372	0.971
372.2	0.328	372.2	0.709	372.2	1.099			372.2	0.32	372.2	0.837	372.2	0.975
372.4	0.328	372.4	0.711	372.4	1.104			372.4	0.32	372.4	0.84	372.4	0.979
372.6	0.328	372.6	0.713	372.6	1.108			372.6	0.32	372.6	0.844	372.6	0.984
372.8	0.328	372.8	0.715	372.8	1.113			372.8	0.32	372.8	0.847	372.8	0.988
373	0.328	373	0.717	373	1.117			373	0.32	373	0.851	373	0.992
373.2	0.328	373.2	0.718	373.2	1.122			373.2	0.32	373.2	0.854	373.2	0.997
373.4	0.327	373.4	0.72	373.4	1.127			373.4	0.32	373.4	0.858	373.4	1.001
373.6	0.327	373.6	0.722	373.6	1.131			373.6	0.32	373.6	0.861	373.6	1.005
373.8	0.327	373.8	0.724	373.8	1.136			373.8	0.32	373.8	0.865	373.8	1.009
374	0.327	374	0.726	374	1.141			374	0.32	374	0.868	374	1.014
374.2	0.326	374.2	0.728	374.2	1.145			374.2	0.32	374.2	0.871	374.2	1.018
374.4	0.326	374.4	0.73	374.4	1.149			374.4	0.32	374.4	0.875	374.4	1.022
374.6	0.326	374.6	0.731	374.6	1.154			374.6	0.32	374.6	0.878	374.6	1.026
374.8	0.326	374.8	0.733	374.8	1.159			374.8	0.32	374.8	0.882	374.8	1.03
375	0.325	375	0.735	375	1.164			375	0.32	375	0.886	375	1.035
375.2	0.325	375.2	0.737	375.2	1.169			375.2	0.32	375.2	0.889	375.2	1.039
375.4	0.325	375.4	0.739	375.4	1.173			375.4	0.32	375.4	0.892	375.4	1.044
375.6	0.324	375.6	0.741	375.6	1.178			375.6	0.32	375.6	0.896	375.6	1.048
375.8	0.324	375.8	0.743	375.8	1.183			375.8	0.32	375.8	0.899	375.8	1.053
376	0.324	376	0.745	376	1.188			376	0.32	376	0.903	376	1.057
376.2	0.324	376.2	0.747	376.2	1.193			376.2	0.321	376.2	0.907	376.2	1.062
376.4	0.324	376.4	0.748	376.4	1.197			376.4	0.32	376.4	0.91	376.4	1.066
376.6	0.323	376.6	0.75	376.6	1.202			376.6	0.321	376.6	0.914	376.6	1.07
376.8	0.323	376.8	0.752	376.8	1.207			376.8	0.32	376.8	0.917	376.8	1.074
377	0.323	377	0.754	377	1.211			377	0.32	377	0.921	377	1.079
377.2	0.323	377.2	0.756	377.2	1.216			377.2	0.32	377.2	0.924	377.2	1.083
377.4	0.323	377.4	0.758	377.4	1.222			377.4	0.32	377.4	0.928	377.4	1.088
377.6	0.322	377.6	0.76	377.6	1.226			377.6	0.32	377.6	0.931	377.6	1.092
377.8	0.322	377.8	0.762	377.8	1.231			377.8	0.32	377.8	0.935	377.8	1.096
378	0.322	378	0.764	378	1.235			378	0.32	378	0.938	378	1.101
378.2	0.321	378.2	0.765	378.2	1.24			378.2	0.32	378.2	0.942	378.2	1.105
378.4	0.321	378.4	0.767	378.4	1.244			378.4	0.32	378.4	0.945	378.4	1.109
378.6	0.321	378.6	0.769	378.6	1.249			378.6	0.321	378.6	0.949	378.6	1.114
378.8	0.321	378.8	0.771	378.8	1.254			378.8	0.32	378.8	0.952	378.8	1.118
379	0.32	379	0.772	379	1.259			379	0.321	379	0.956	379	1.123
379.2	0.32	379.2	0.774	379.2	1.264			379.2	0.32	379.2	0.96	379.2	1.128
379.4	0.32	379.4	0.776	379.4	1.269			379.4	0.32	379.4	0.964	379.4	1.132
379.6	0.32	379.6	0.778	379.6	1.274			379.6	0.32	379.6	0.967	379.6	1.137
379.8	0.319	379.8	0.78	379.8	1.279			379.8	0.32	379.8	0.971	379.8	1.141
380	0.319	380	0.782	380	1.284			380	0.321	380	0.975	380	1.146
380.2	0.318	380.2	0.784	380.2	1.289			380.2	0.321	380.2	0.979	380.2	1.15
380.4	0.318	380.4	0.786	380.4	1.294			380.4	0.321	380.4	0.983	380.4	1.155
380.6	0.318	380.6	0.788	380.6	1.299			380.6	0.321	380.6	0.986	380.6	1.159
380.8	0.317	380.8	0.79	380.8	1.304			380.8	0.32	380.8	0.99	380.8	1.164
381	0.317	381	0.792	381	1.309			381	0.32	381	0.994	381	1.169
381.2	0.317	381.2	0.793	381.2	1.314			381.2	0.32	381.2	0.998	381.2	1.173
381.4	0.317	381.4	0.795	381.4	1.319			381.4	0.32	381.4	1.002	381.4	1.178
381.6	0.317	381.6	0.797	381.6	1.324			381.6	0.32	381.6	1.006	381.6	1.182
381.8	0.316	381.8	0.799	381.8	1.33			381.8	0.32	381.8	1.009	381.8	1.187
382	0.316	382	0.801	382	1.335			382	0.32	382	1.013	382	1.191
382.2	0.316	382.2	0.803	382.2	1.34			382.2	0.32	382.2	1.017	382.2	1.196
382.4	0.316	382.4	0.805	382.4	1.345			382.4	0.32	382.4	1.021	382.4	1.2
382.6	0.316	382.6	0.807	382.6	1.35			382.6	0.32	382.6	1.025	382.6	1.205
382.8	0.315	382.8	0.809	382.8	1.355			382.8	0.32	382.8	1.029	382.8	1.209
383	0.315	383	0.811	383	1.36			383	0.32	383	1.033	383	1.213
383.2	0.314	383.2	0.812	383.2	1.366			383.2	0.32	383.2	1.036	383.2	1.218
383.4	0.314	383.4	0.814	383.4	1.37			383.4	0.32	383.4	1.04	383.4	1.222
383.6	0.314	383.6	0.816	383.6	1.375			383.6	0.32	383.6	1.044	383.6	1.227
383.8	0.313	383.8	0.818	383.8	1.38			383.8	0.32	383.8	1.048	383.8	1.232
384	0.313	384	0.82	384	1.386			384	0.32	384	1.052	384	1.236
384.2	0.312	384.2	0.821	384.2	1.39			384.2	0.32	384.2	1.056	384.2	1.241
384.4	0.312	384.4	0.823	384.4	1.395			384.4	0.32	384.4	1.06	384.4	1.245
384.6	0.312	384.6	0.825	384.6	1.4			384.6	0.32	384.6	1.064	384.6	1.25
384.8	0.311	384.8	0.827	384.8	1.405			384.8	0.32	384.8	1.068	384.8	1.254
385	0.311	385	0.829	385	1.41			385	0.32	385	1.072	385	1.259
385.2	0.311	385.2	0.831	385.2	1.415			385.2	0.32	385.2	1.076	385.2	1.263
385.4	0.311	385.4	0.833	385.4	1.421			385.4	0.32	385.4	1.08	385.4	1.268
385.6	0.31	385.6	0.835	385.6	1.425			385.6	0.32	385.6	1.083	385.6	1.272
385.8	0.31	385.8	0.837	385.8	1.43			385.8	0.32	385.8	1.087	385.8	1.277
386	0.31	386	0.839	386	1.435			386	0.32	386	1.091	386	1.281
386.2	0.31	386.2	0.841	386.2	1.44			386.2	0.32	386.2	1.095	386.2	1.286
386.4	0.31	386.4	0.843	386.4	1.445			386.4	0.32	386.4	1.099	386.4	1.29
386.6	0.309	386.6	0.844	386.6	1.45			386.6	0.319	386.6	1.103	386.6	1.295
386.8	0.309	386.8	0.846	386.8	1.455			386.8	0.319	386.8	1.107	386.8	1.299
387	0.309	387	0.848	387	1.459			387	0.319	387	1.11	387	1.303
387.2	0.308	387.2	0.85	387.2	1.463			387.2	0.319	387.2	1.114	387.2	1.307
387.4	0.308	387.4	0.851	387.4	1.468			387.4	0.319	387.4	1.117	387.4	1.311
387.6	0.308	387.6	0.853	387.6	1.472			387.6	0.319	387.6	1.121	387.6	1.315
387.8	0.307	387.8	0.855	387.8	1.477			387.8	0.319	387.8	1.125	387.8	1.319
388	0.307	388	0.856	388	1.482			388	0.319	388	1.128	388	1.324
388.2	0.306	388.2	0.858	388.2	1.486			388.2	0.319	388.2	1.132	388.2	1.328
388.4	0.306	388.4	0.86	388.4	1.491			388.4	0.318	388.4	1.136	388.4	1.332
388.6	0.305	388.6	0.862	388.6	1.495			388.6	0.318	388.6	1.139	388.6	1.336
388.8	0.305	388.8	0.864	388.8	1.5			388.8	0.318	388.8	1.143	388.8	1.34
389	0.305	389	0.866	389	1.504			389	0.318	389	1.147	389	1.345
389.2	0.304	389.2	0.867	389.2	1.508			389.2	0.318	389.2	1.15	389.2	1.349
389.4	0.304	389.4	0.869	389.4	1.513			389.4	0.318	389.4	1.154	389.4	1.353
389.6	0.304	389.6	0.871	389.6	1.518			389.6	0.318	389.6	1.158	389.6	1.358
389.8	0.303	389.8	0.873	389.8	1.522			389.8	0.318	389.8	1.162	389.8	1.362
390	0.303	390	0.875	390	1.527			390	0.317	390	1.166	390	1.366
390.2	0.303	390.2	0.877	390.2	1.531			390.2	0.317	390.2	1.169	390.2	1.37
390.4	0.302	390.4	0.878	390.4	1.535			390.4	0.317	390.4	1.173	390.4	1.374
390.6	0.302	390.6	0.88	390.6	1.54			390.6	0.317	390.6	1.176	390.6	1.378
390.8	0.302	390.8	0.882	390.8	1.544			390.8	0.317	390.8	1.179	390.8	1.382
391	0.301	391	0.883	391	1.547			391	0.317	391	1.183	391	1.385
391.2	0.301	391.2	0.885	391.2	1.551			391.2	0.317	391.2	1.186	391.2	1.389
391.4	0.301	391.4	0.887	391.4	1.555			391.4	0.316	391.4	1.19	391.4	1.394
391.6	0.3	391.6	0.889	391.6	1.559			391.6	0.316	391.6	1.194	391.6	1.397
391.8	0.3	391.8	0.891	391.8	1.563			391.8	0.316	391.8	1.197	391.8	1.401
392	0.299	392	0.893	392	1.568			392	0.316	392	1.2	392	1.405
392.2	0.299	392.2	0.894	392.2	1.572			392.2	0.316	392.2	1.204	392.2	1.408
392.4	0.299	392.4	0.896	392.4	1.576			392.4	0.315	392.4	1.208	392.4	1.412
392.6	0.298	392.6	0.898	392.6	1.58			392.6	0.315	392.6	1.211	392.6	1.416
392.8	0.298	392.8	0.9	392.8	1.584			392.8	0.315	392.8	1.214	392.8	1.42
393	0.297	393	0.902	393	1.588			393	0.315	393	1.218	393	1.424
393.2	0.297	393.2	0.904	393.2	1.592			393.2	0.314	393.2	1.221	393.2	1.427
393.4	0.297	393.4	0.905	393.4	1.595			393.4	0.314	393.4	1.224	393.4	1.431
393.6	0.296	393.6	0.907	393.6	1.599			393.6	0.314	393.6	1.227	393.6	1.434
393.8	0.295	393.8	0.908	393.8	1.603			393.8	0.314	393.8	1.23	393.8	1.437
394	0.295	394	0.91	394	1.606			394	0.314	394	1.233	394	1.44
394.2	0.294	394.2	0.911	394.2	1.61			394.2	0.314	394.2	1.237	394.2	1.444
394.4	0.294	394.4	0.913	394.4	1.614			394.4	0.314	394.4	1.24	394.4	1.447
394.6	0.294	394.6	0.915	394.6	1.617			394.6	0.313	394.6	1.243	394.6	1.451
394.8	0.293	394.8	0.917	394.8	1.621			394.8	0.313	394.8	1.246	394.8	1.454
395	0.293	395	0.919	395	1.624			395	0.313	395	1.249	395	1.457
395.2	0.292	395.2	0.92	395.2	1.627			395.2	0.313	395.2	1.252	395.2	1.46
395.4	0.292	395.4	0.922	395.4	1.631			395.4	0.313	395.4	1.255	395.4	1.463
395.6	0.292	395.6	0.924	395.6	1.634			395.6	0.313	395.6	1.259	395.6	1.467
395.8	0.291	395.8	0.926	395.8	1.637			395.8	0.312	395.8	1.262	395.8	1.47
396	0.291	396	0.927	396	1.64			396	0.312	396	1.265	396	1.473
396.2	0.29	396.2	0.929	396.2	1.643			396.2	0.312	396.2	1.268	396.2	1.476
396.4	0.29	396.4	0.931	396.4	1.646			396.4	0.312	396.4	1.271	396.4	1.479
396.6	0.29	396.6	0.933	396.6	1.649			396.6	0.312	396.6	1.274	396.6	1.482
396.8	0.289	396.8	0.934	396.8	1.652			396.8	0.311	396.8	1.277	396.8	1.485
397	0.289	397	0.936	397	1.656			397	0.311	397	1.279	397	1.488
397.2	0.288	397.2	0.938	397.2	1.659			397.2	0.311	397.2	1.283	397.2	1.491
397.4	0.288	397.4	0.94	397.4	1.662			397.4	0.31	397.4	1.286	397.4	1.493
397.6	0.287	397.6	0.941	397.6	1.665			397.6	0.31	397.6	1.289	397.6	1.496
397.8	0.287	397.8	0.943	397.8	1.668			397.8	0.31	397.8	1.292	397.8	1.498
398	0.286	398	0.944	398	1.67			398	0.31	398	1.295	398	1.501
398.2	0.286	398.2	0.946	398.2	1.673			398.2	0.309	398.2	1.297	398.2	1.503
398.4	0.285	398.4	0.948	398.4	1.675			398.4	0.309	398.4	1.3	398.4	1.505
398.6	0.285	398.6	0.949	398.6	1.677			398.6	0.309	398.6	1.303	398.6	1.508
398.8	0.284	398.8	0.951	398.8	1.679			398.8	0.309	398.8	1.305	398.8	1.51
399	0.284	399	0.953	399	1.682			399	0.308	399	1.308	399	1.512
399.2	0.283	399.2	0.954	399.2	1.684			399.2	0.308	399.2	1.311	399.2	1.514
399.4	0.283	399.4	0.956	399.4	1.687			399.4	0.308	399.4	1.313	399.4	1.516
399.6	0.282	399.6	0.957	399.6	1.689			399.6	0.307	399.6	1.315	399.6	1.518
399.8	0.282	399.8	0.959	399.8	1.691			399.8	0.307	399.8	1.317	399.8	1.52
400	0.282	400	0.96	400	1.693			400	0.307	400	1.319	400	1.522
400.2	0.281	400.2	0.962	400.2	1.695			400.2	0.307	400.2	1.321	400.2	1.524
400.4	0.281	400.4	0.963	400.4	1.697			400.4	0.306	400.4	1.323	400.4	1.525
400.6	0.28	400.6	0.965	400.6	1.699			400.6	0.306	400.6	1.325	400.6	1.527
400.8	0.28	400.8	0.966	400.8	1.7			400.8	0.306	400.8	1.328	400.8	1.529
401	0.279	401	0.968	401	1.702			401	0.306	401	1.33	401	1.53
401.2	0.278	401.2	0.969	401.2	1.704			401.2	0.305	401.2	1.332	401.2	1.532
401.4	0.278	401.4	0.971	401.4	1.705			401.4	0.305	401.4	1.334	401.4	1.533
401.6	0.277	401.6	0.972	401.6	1.707			401.6	0.305	401.6	1.336	401.6	1.535
401.8	0.277	401.8	0.974	401.8	1.708			401.8	0.305	401.8	1.338	401.8	1.536
402	0.277	402	0.975	402	1.709			402	0.304	402	1.34	402	1.538
402.2	0.276	402.2	0.976	402.2	1.711			402.2	0.304	402.2	1.342	402.2	1.539
402.4	0.276	402.4	0.978	402.4	1.712			402.4	0.304	402.4	1.344	402.4	1.54
402.6	0.275	402.6	0.979	402.6	1.713			402.6	0.303	402.6	1.345	402.6	1.541
402.8	0.275	402.8	0.981	402.8	1.714			402.8	0.303	402.8	1.347	402.8	1.542
403	0.274	403	0.982	403	1.715			403	0.303	403	1.349	403	1.543
403.2	0.273	403.2	0.984	403.2	1.716			403.2	0.302	403.2	1.35	403.2	1.544
403.4	0.273	403.4	0.985	403.4	1.717			403.4	0.302	403.4	1.351	403.4	1.544
403.6	0.273	403.6	0.986	403.6	1.718			403.6	0.301	403.6	1.353	403.6	1.545
403.8	0.272	403.8	0.988	403.8	1.719			403.8	0.301	403.8	1.354	403.8	1.546
404	0.272	404	0.989	404	1.72			404	0.301	404	1.355	404	1.546
404.2	0.271	404.2	0.99	404.2	1.72			404.2	0.3	404.2	1.357	404.2	1.547
404.4	0.271	404.4	0.992	404.4	1.721			404.4	0.3	404.4	1.358	404.4	1.547
404.6	0.27	404.6	0.993	404.6	1.721			404.6	0.3	404.6	1.359	404.6	1.547
404.8	0.27	404.8	0.995	404.8	1.722			404.8	0.299	404.8	1.36	404.8	1.548
405	0.27	405	0.996	405	1.722			405	0.299	405	1.361	405	1.548
405.2	0.269	405.2	0.997	405.2	1.722			405.2	0.299	405.2	1.362	405.2	1.548
405.4	0.269	405.4	0.999	405.4	1.723			405.4	0.299	405.4	1.363	405.4	1.549
405.6	0.268	405.6	0.999	405.6	1.723			405.6	0.298	405.6	1.364	405.6	1.549
405.8	0.268	405.8	1	405.8	1.723			405.8	0.298	405.8	1.365	405.8	1.549
406	0.267	406	1.001	406	1.722			406	0.298	406	1.366	406	1.548
406.2	0.266	406.2	1.003	406.2	1.722			406.2	0.297	406.2	1.367	406.2	1.548
406.4	0.266	406.4	1.004	406.4	1.722			406.4	0.297	406.4	1.368	406.4	1.548
406.6	0.266	406.6	1.005	406.6	1.722			406.6	0.296	406.6	1.369	406.6	1.548
406.8	0.265	406.8	1.006	406.8	1.722			406.8	0.296	406.8	1.37	406.8	1.547
407	0.265	407	1.007	407	1.722			407	0.296	407	1.37	407	1.547
407.2	0.264	407.2	1.008	407.2	1.722			407.2	0.295	407.2	1.371	407.2	1.546
407.4	0.264	407.4	1.009	407.4	1.721			407.4	0.295	407.4	1.371	407.4	1.546
407.6	0.263	407.6	1.01	407.6	1.721			407.6	0.294	407.6	1.371	407.6	1.545
407.8	0.263	407.8	1.011	407.8	1.72			407.8	0.294	407.8	1.371	407.8	1.544
408	0.262	408	1.012	408	1.719			408	0.294	408	1.371	408	1.544
408.2	0.262	408.2	1.013	408.2	1.719			408.2	0.293	408.2	1.372	408.2	1.543
408.4	0.261	408.4	1.014	408.4	1.718			408.4	0.293	408.4	1.372	408.4	1.542
408.6	0.261	408.6	1.015	408.6	1.718			408.6	0.292	408.6	1.372	408.6	1.541
408.8	0.26	408.8	1.016	408.8	1.716			408.8	0.292	408.8	1.373	408.8	1.54
409	0.26	409	1.017	409	1.715			409	0.292	409	1.372	409	1.539
409.2	0.26	409.2	1.018	409.2	1.714			409.2	0.291	409.2	1.372	409.2	1.537
409.4	0.259	409.4	1.019	409.4	1.713			409.4	0.291	409.4	1.372	409.4	1.536
409.6	0.259	409.6	1.02	409.6	1.712			409.6	0.29	409.6	1.372	409.6	1.534
409.8	0.258	409.8	1.02	409.8	1.71			409.8	0.29	409.8	1.372	409.8	1.533
410	0.258	410	1.021	410	1.709			410	0.289	410	1.371	410	1.532
410.2	0.257	410.2	1.022	410.2	1.707			410.2	0.289	410.2	1.371	410.2	1.53
410.4	0.257	410.4	1.023	410.4	1.706			410.4	0.288	410.4	1.371	410.4	1.528
410.6	0.256	410.6	1.024	410.6	1.704			410.6	0.288	410.6	1.37	410.6	1.527
410.8	0.256	410.8	1.024	410.8	1.702			410.8	0.288	410.8	1.37	410.8	1.524
411	0.255	411	1.025	411	1.7			411	0.287	411	1.369	411	1.522
411.2	0.255	411.2	1.025	411.2	1.699			411.2	0.287	411.2	1.369	411.2	1.52
411.4	0.254	411.4	1.026	411.4	1.697			411.4	0.286	411.4	1.368	411.4	1.518
411.6	0.254	411.6	1.027	411.6	1.695			411.6	0.286	411.6	1.367	411.6	1.516
411.8	0.254	411.8	1.028	411.8	1.692			411.8	0.286	411.8	1.366	411.8	1.514
412	0.253	412	1.028	412	1.69			412	0.285	412	1.365	412	1.512
412.2	0.253	412.2	1.029	412.2	1.688			412.2	0.285	412.2	1.364	412.2	1.509
412.4	0.252	412.4	1.029	412.4	1.686			412.4	0.284	412.4	1.363	412.4	1.507
412.6	0.251	412.6	1.03	412.6	1.684			412.6	0.284	412.6	1.363	412.6	1.504
412.8	0.251	412.8	1.03	412.8	1.681			412.8	0.284	412.8	1.361	412.8	1.502
413	0.251	413	1.031	413	1.678			413	0.283	413	1.36	413	1.5
413.2	0.25	413.2	1.031	413.2	1.676			413.2	0.283	413.2	1.359	413.2	1.497
413.4	0.25	413.4	1.032	413.4	1.673			413.4	0.282	413.4	1.357	413.4	1.494
413.6	0.25	413.6	1.032	413.6	1.671			413.6	0.281	413.6	1.356	413.6	1.491
413.8	0.249	413.8	1.033	413.8	1.669			413.8	0.281	413.8	1.354	413.8	1.488
414	0.249	414	1.033	414	1.666			414	0.28	414	1.352	414	1.485
414.2	0.249	414.2	1.034	414.2	1.663			414.2	0.28	414.2	1.351	414.2	1.482
414.4	0.248	414.4	1.034	414.4	1.66			414.4	0.28	414.4	1.349	414.4	1.479
414.6	0.248	414.6	1.034	414.6	1.657			414.6	0.279	414.6	1.347	414.6	1.476
414.8	0.248	414.8	1.035	414.8	1.653			414.8	0.279	414.8	1.346	414.8	1.472
415	0.247	415	1.035	415	1.65			415	0.278	415	1.344	415	1.468
415.2	0.247	415.2	1.035	415.2	1.647			415.2	0.278	415.2	1.342	415.2	1.465
415.4	0.246	415.4	1.035	415.4	1.644			415.4	0.277	415.4	1.34	415.4	1.462
415.6	0.246	415.6	1.036	415.6	1.64			415.6	0.277	415.6	1.338	415.6	1.458
415.8	0.245	415.8	1.036	415.8	1.637			415.8	0.276	415.8	1.336	415.8	1.454
416	0.245	416	1.036	416	1.633			416	0.276	416	1.334	416	1.451
416.2	0.244	416.2	1.036	416.2	1.629			416.2	0.275	416.2	1.332	416.2	1.447
416.4	0.244	416.4	1.036	416.4	1.625			416.4	0.275	416.4	1.33	416.4	1.443
416.6	0.244	416.6	1.036	416.6	1.621			416.6	0.274	416.6	1.327	416.6	1.439
416.8	0.243	416.8	1.037	416.8	1.617			416.8	0.274	416.8	1.325	416.8	1.435
417	0.243	417	1.037	417	1.613			417	0.274	417	1.322	417	1.431
417.2	0.242	417.2	1.037	417.2	1.609			417.2	0.274	417.2	1.319	417.2	1.426
417.4	0.242	417.4	1.037	417.4	1.605			417.4	0.273	417.4	1.317	417.4	1.422
417.6	0.242	417.6	1.037	417.6	1.601			417.6	0.273	417.6	1.314	417.6	1.418
417.8	0.241	417.8	1.037	417.8	1.597			417.8	0.272	417.8	1.311	417.8	1.413
418	0.241	418	1.037	418	1.592			418	0.272	418	1.309	418	1.409
418.2	0.241	418.2	1.037	418.2	1.588			418.2	0.271	418.2	1.305	418.2	1.404
418.4	0.24	418.4	1.037	418.4	1.584			418.4	0.271	418.4	1.303	418.4	1.4
418.6	0.24	418.6	1.037	418.6	1.58			418.6	0.271	418.6	1.299	418.6	1.396
418.8	0.24	418.8	1.037	418.8	1.576			418.8	0.27	418.8	1.297	418.8	1.391
419	0.239	419	1.037	419	1.571			419	0.269	419	1.294	419	1.386
419.2	0.239	419.2	1.036	419.2	1.566			419.2	0.269	419.2	1.291	419.2	1.382
419.4	0.238	419.4	1.036	419.4	1.562			419.4	0.268	419.4	1.287	419.4	1.377
419.6	0.238	419.6	1.036	419.6	1.557			419.6	0.268	419.6	1.284	419.6	1.372
419.8	0.237	419.8	1.036	419.8	1.552			419.8	0.267	419.8	1.28	419.8	1.366
420	0.237	420	1.036	420	1.547			420	0.267	420	1.277	420	1.361
420.2	0.236	420.2	1.035	420.2	1.541			420.2	0.267	420.2	1.273	420.2	1.356
420.4	0.236	420.4	1.035	420.4	1.536			420.4	0.266	420.4	1.27	420.4	1.351
420.6	0.236	420.6	1.035	420.6	1.531			420.6	0.266	420.6	1.266	420.6	1.345
420.8	0.236	420.8	1.034	420.8	1.527			420.8	0.265	420.8	1.262	420.8	1.34
421	0.235	421	1.034	421	1.521			421	0.264	421	1.258	421	1.335
421.2	0.235	421.2	1.033	421.2	1.516			421.2	0.264	421.2	1.254	421.2	1.329
421.4	0.235	421.4	1.033	421.4	1.511			421.4	0.263	421.4	1.25	421.4	1.324
421.6	0.234	421.6	1.033	421.6	1.506			421.6	0.263	421.6	1.246	421.6	1.318
421.8	0.234	421.8	1.032	421.8	1.501			421.8	0.262	421.8	1.242	421.8	1.313
422	0.233	422	1.032	422	1.495			422	0.262	422	1.238	422	1.307
422.2	0.233	422.2	1.031	422.2	1.49			422.2	0.261	422.2	1.234	422.2	1.301
422.4	0.233	422.4	1.031	422.4	1.484			422.4	0.261	422.4	1.23	422.4	1.296
422.6	0.232	422.6	1.03	422.6	1.478			422.6	0.26	422.6	1.226	422.6	1.29
422.8	0.232	422.8	1.029	422.8	1.472			422.8	0.26	422.8	1.221	422.8	1.284
423	0.232	423	1.029	423	1.467			423	0.259	423	1.217	423	1.278
423.2	0.232	423.2	1.028	423.2	1.461			423.2	0.259	423.2	1.213	423.2	1.272
423.4	0.231	423.4	1.027	423.4	1.456			423.4	0.258	423.4	1.209	423.4	1.267
423.6	0.231	423.6	1.026	423.6	1.45			423.6	0.258	423.6	1.205	423.6	1.26
423.8	0.23	423.8	1.025	423.8	1.444			423.8	0.257	423.8	1.2	423.8	1.255
424	0.23	424	1.025	424	1.438			424	0.257	424	1.196	424	1.249
424.2	0.229	424.2	1.024	424.2	1.432			424.2	0.257	424.2	1.191	424.2	1.243
424.4	0.229	424.4	1.023	424.4	1.426			424.4	0.256	424.4	1.186	424.4	1.237
424.6	0.229	424.6	1.022	424.6	1.42			424.6	0.256	424.6	1.182	424.6	1.231
424.8	0.229	424.8	1.021	424.8	1.414			424.8	0.255	424.8	1.177	424.8	1.225
425	0.228	425	1.021	425	1.408			425	0.255	425	1.172	425	1.219
425.2	0.228	425.2	1.02	425.2	1.401			425.2	0.254	425.2	1.167	425.2	1.213
425.4	0.228	425.4	1.019	425.4	1.395			425.4	0.253	425.4	1.162	425.4	1.207
425.6	0.227	425.6	1.018	425.6	1.389			425.6	0.253	425.6	1.158	425.6	1.2
425.8	0.227	425.8	1.017	425.8	1.382			425.8	0.253	425.8	1.152	425.8	1.194
426	0.227	426	1.016	426	1.376			426	0.252	426	1.148	426	1.188
426.2	0.226	426.2	1.014	426.2	1.37			426.2	0.252	426.2	1.142	426.2	1.181
426.4	0.226	426.4	1.013	426.4	1.364			426.4	0.251	426.4	1.137	426.4	1.176
426.6	0.225	426.6	1.012	426.6	1.358			426.6	0.251	426.6	1.132	426.6	1.169
426.8	0.225	426.8	1.011	426.8	1.352			426.8	0.25	426.8	1.127	426.8	1.163
427	0.225	427	1.01	427	1.345			427	0.25	427	1.122	427	1.157
427.2	0.225	427.2	1.009	427.2	1.338			427.2	0.249	427.2	1.117	427.2	1.15
427.4	0.224	427.4	1.008	427.4	1.331			427.4	0.249	427.4	1.111	427.4	1.143
427.6	0.224	427.6	1.007	427.6	1.324			427.6	0.248	427.6	1.105	427.6	1.137
427.8	0.224	427.8	1.005	427.8	1.318			427.8	0.248	427.8	1.1	427.8	1.131
428	0.223	428	1.004	428	1.311			428	0.247	428	1.095	428	1.124
428.2	0.223	428.2	1.002	428.2	1.305			428.2	0.247	428.2	1.089	428.2	1.118
428.4	0.223	428.4	1.001	428.4	1.298			428.4	0.247	428.4	1.084	428.4	1.111
428.6	0.222	428.6	1	428.6	1.291			428.6	0.246	428.6	1.078	428.6	1.104
428.8	0.222	428.8	0.998	428.8	1.285			428.8	0.246	428.8	1.073	428.8	1.098
429	0.222	429	0.997	429	1.278			429	0.245	429	1.067	429	1.091
429.2	0.221	429.2	0.996	429.2	1.272			429.2	0.245	429.2	1.062	429.2	1.085
429.4	0.221	429.4	0.994	429.4	1.265			429.4	0.244	429.4	1.056	429.4	1.078
429.6	0.221	429.6	0.993	429.6	1.258			429.6	0.244	429.6	1.051	429.6	1.072
429.8	0.22	429.8	0.991	429.8	1.252			429.8	0.243	429.8	1.045	429.8	1.065
430	0.22	430	0.99	430	1.245			430	0.243	430	1.039	430	1.057
430.2	0.22	430.2	0.988	430.2	1.238			430.2	0.243	430.2	1.033	430.2	1.051
430.4	0.219	430.4	0.987	430.4	1.231			430.4	0.242	430.4	1.027	430.4	1.044
430.6	0.219	430.6	0.985	430.6	1.224			430.6	0.241	430.6	1.021	430.6	1.037
430.8	0.219	430.8	0.983	430.8	1.217			430.8	0.241	430.8	1.015	430.8	1.031
431	0.218	431	0.982	431	1.211			431	0.24	431	1.009	431	1.024
431.2	0.218	431.2	0.98	431.2	1.204			431.2	0.24	431.2	1.003	431.2	1.017
431.4	0.218	431.4	0.978	431.4	1.198			431.4	0.24	431.4	0.998	431.4	1.01
431.6	0.217	431.6	0.976	431.6	1.191			431.6	0.239	431.6	0.992	431.6	1.003
431.8	0.217	431.8	0.975	431.8	1.184			431.8	0.239	431.8	0.986	431.8	0.997
432	0.217	432	0.973	432	1.177			432	0.239	432	0.98	432	0.99
432.2	0.216	432.2	0.971	432.2	1.17			432.2	0.238	432.2	0.974	432.2	0.983
432.4	0.216	432.4	0.969	432.4	1.163			432.4	0.237	432.4	0.967	432.4	0.976
432.6	0.216	432.6	0.967	432.6	1.156			432.6	0.237	432.6	0.962	432.6	0.97
432.8	0.215	432.8	0.965	432.8	1.149			432.8	0.236	432.8	0.955	432.8	0.963
433	0.215	433	0.964	433	1.141			433	0.236	433	0.949	433	0.956
433.2	0.215	433.2	0.962	433.2	1.134			433.2	0.236	433.2	0.943	433.2	0.949
433.4	0.214	433.4	0.96	433.4	1.127			433.4	0.235	433.4	0.937	433.4	0.942
433.6	0.214	433.6	0.959	433.6	1.12			433.6	0.235	433.6	0.931	433.6	0.935
433.8	0.214	433.8	0.957	433.8	1.113			433.8	0.235	433.8	0.925	433.8	0.929
434	0.214	434	0.955	434	1.106			434	0.234	434	0.919	434	0.922
434.2	0.213	434.2	0.953	434.2	1.1			434.2	0.234	434.2	0.913	434.2	0.916
434.4	0.213	434.4	0.951	434.4	1.093			434.4	0.233	434.4	0.907	434.4	0.909
434.6	0.212	434.6	0.949	434.6	1.085			434.6	0.233	434.6	0.9	434.6	0.902
434.8	0.212	434.8	0.947	434.8	1.078			434.8	0.232	434.8	0.894	434.8	0.895
435	0.212	435	0.945	435	1.071			435	0.232	435	0.888	435	0.888
435.2	0.211	435.2	0.943	435.2	1.064			435.2	0.231	435.2	0.881	435.2	0.882
435.4	0.211	435.4	0.941	435.4	1.057			435.4	0.231	435.4	0.875	435.4	0.875
435.6	0.211	435.6	0.939	435.6	1.05			435.6	0.231	435.6	0.87	435.6	0.869
435.8	0.21	435.8	0.937	435.8	1.043			435.8	0.23	435.8	0.864	435.8	0.862
436	0.21	436	0.935	436	1.037			436	0.23	436	0.858	436	0.856
436.2	0.21	436.2	0.933	436.2	1.03			436.2	0.229	436.2	0.852	436.2	0.85
436.4	0.209	436.4	0.932	436.4	1.024			436.4	0.229	436.4	0.846	436.4	0.843
436.6	0.209	436.6	0.93	436.6	1.017			436.6	0.228	436.6	0.841	436.6	0.837
436.8	0.209	436.8	0.928	436.8	1.011			436.8	0.228	436.8	0.835	436.8	0.831
437	0.209	437	0.926	437	1.004			437	0.228	437	0.829	437	0.825
437.2	0.208	437.2	0.924	437.2	0.997			437.2	0.227	437.2	0.822	437.2	0.818
437.4	0.208	437.4	0.922	437.4	0.991			437.4	0.227	437.4	0.816	437.4	0.812
437.6	0.208	437.6	0.92	437.6	0.984			437.6	0.227	437.6	0.81	437.6	0.805
437.8	0.208	437.8	0.918	437.8	0.978			437.8	0.227	437.8	0.804	437.8	0.799
438	0.207	438	0.916	438	0.971			438	0.226	438	0.798	438	0.793
438.2	0.207	438.2	0.914	438.2	0.964			438.2	0.226	438.2	0.792	438.2	0.786
438.4	0.207	438.4	0.912	438.4	0.958			438.4	0.226	438.4	0.786	438.4	0.78
438.6	0.207	438.6	0.91	438.6	0.951			438.6	0.225	438.6	0.78	438.6	0.774
438.8	0.206	438.8	0.908	438.8	0.945			438.8	0.225	438.8	0.774	438.8	0.768
439	0.206	439	0.905	439	0.939			439	0.225	439	0.768	439	0.762
439.2	0.206	439.2	0.903	439.2	0.932			439.2	0.224	439.2	0.762	439.2	0.756
439.4	0.205	439.4	0.901	439.4	0.926			439.4	0.224	439.4	0.756	439.4	0.75
439.6	0.205	439.6	0.899	439.6	0.92			439.6	0.223	439.6	0.751	439.6	0.744
439.8	0.205	439.8	0.897	439.8	0.914			439.8	0.223	439.8	0.745	439.8	0.738
440	0.204	440	0.895	440	0.908			440	0.223	440	0.739	440	0.732
440.2	0.204	440.2	0.893	440.2	0.902			440.2	0.222	440.2	0.733	440.2	0.726
440.4	0.204	440.4	0.891	440.4	0.896			440.4	0.222	440.4	0.727	440.4	0.72
440.6	0.204	440.6	0.889	440.6	0.89			440.6	0.222	440.6	0.722	440.6	0.714
440.8	0.203	440.8	0.887	440.8	0.884			440.8	0.221	440.8	0.716	440.8	0.709
441	0.203	441	0.885	441	0.878			441	0.221	441	0.711	441	0.703
441.2	0.202	441.2	0.882	441.2	0.872			441.2	0.22	441.2	0.705	441.2	0.697
441.4	0.202	441.4	0.88	441.4	0.866			441.4	0.22	441.4	0.7	441.4	0.692
441.6	0.202	441.6	0.878	441.6	0.86			441.6	0.22	441.6	0.694	441.6	0.686
441.8	0.202	441.8	0.876	441.8	0.854			441.8	0.219	441.8	0.689	441.8	0.681
442	0.201	442	0.874	442	0.848			442	0.219	442	0.683	442	0.675
442.2	0.201	442.2	0.872	442.2	0.842			442.2	0.219	442.2	0.678	442.2	0.67
442.4	0.201	442.4	0.87	442.4	0.836			442.4	0.219	442.4	0.672	442.4	0.665
442.6	0.2	442.6	0.868	442.6	0.83			442.6	0.218	442.6	0.667	442.6	0.659
442.8	0.2	442.8	0.865	442.8	0.825			442.8	0.218	442.8	0.661	442.8	0.654
443	0.2	443	0.863	443	0.819			443	0.218	443	0.656	443	0.648
443.2	0.2	443.2	0.861	443.2	0.813			443.2	0.217	443.2	0.651	443.2	0.643
443.4	0.199	443.4	0.859	443.4	0.808			443.4	0.217	443.4	0.646	443.4	0.638
443.6	0.199	443.6	0.857	443.6	0.802			443.6	0.217	443.6	0.641	443.6	0.633
443.8	0.199	443.8	0.855	443.8	0.796			443.8	0.217	443.8	0.636	443.8	0.628
444	0.199	444	0.853	444	0.791			444	0.216	444	0.631	444	0.623
444.2	0.199	444.2	0.85	444.2	0.785			444.2	0.216	444.2	0.626	444.2	0.618
444.4	0.198	444.4	0.848	444.4	0.78			444.4	0.216	444.4	0.621	444.4	0.613
444.6	0.198	444.6	0.846	444.6	0.774			444.6	0.216	444.6	0.616	444.6	0.608
444.8	0.198	444.8	0.843	444.8	0.769			444.8	0.215	444.8	0.611	444.8	0.603
445	0.198	445	0.841	445	0.763			445	0.215	445	0.605	445	0.598
445.2	0.197	445.2	0.839	445.2	0.758			445.2	0.214	445.2	0.6	445.2	0.593
445.4	0.197	445.4	0.837	445.4	0.752			445.4	0.214	445.4	0.595	445.4	0.588
445.6	0.197	445.6	0.835	445.6	0.747			445.6	0.214	445.6	0.59	445.6	0.583
445.8	0.197	445.8	0.832	445.8	0.741			445.8	0.214	445.8	0.586	445.8	0.579
446	0.197	446	0.83	446	0.736			446	0.213	446	0.581	446	0.574
446.2	0.196	446.2	0.828	446.2	0.731			446.2	0.213	446.2	0.576	446.2	0.569
446.4	0.196	446.4	0.826	446.4	0.726			446.4	0.213	446.4	0.572	446.4	0.565
446.6	0.196	446.6	0.824	446.6	0.721			446.6	0.213	446.6	0.567	446.6	0.56
446.8	0.196	446.8	0.822	446.8	0.717			446.8	0.213	446.8	0.562	446.8	0.556
447	0.195	447	0.819	447	0.712			447	0.212	447	0.558	447	0.551
447.2	0.195	447.2	0.817	447.2	0.706			447.2	0.212	447.2	0.553	447.2	0.547
447.4	0.195	447.4	0.815	447.4	0.701			447.4	0.212	447.4	0.549	447.4	0.542
447.6	0.195	447.6	0.812	447.6	0.696			447.6	0.211	447.6	0.544	447.6	0.538
447.8	0.195	447.8	0.81	447.8	0.691			447.8	0.211	447.8	0.54	447.8	0.533
448	0.194	448	0.808	448	0.687			448	0.211	448	0.535	448	0.529
448.2	0.194	448.2	0.805	448.2	0.681			448.2	0.211	448.2	0.53	448.2	0.524
448.4	0.194	448.4	0.803	448.4	0.677			448.4	0.211	448.4	0.526	448.4	0.52
448.6	0.194	448.6	0.801	448.6	0.672			448.6	0.211	448.6	0.522	448.6	0.515
448.8	0.193	448.8	0.799	448.8	0.667			448.8	0.21	448.8	0.518	448.8	0.511
449	0.193	449	0.796	449	0.663			449	0.21	449	0.513	449	0.507
449.2	0.193	449.2	0.794	449.2	0.658			449.2	0.21	449.2	0.509	449.2	0.503
449.4	0.192	449.4	0.791	449.4	0.653			449.4	0.21	449.4	0.505	449.4	0.499
449.6	0.192	449.6	0.789	449.6	0.648			449.6	0.21	449.6	0.5	449.6	0.494
449.8	0.192	449.8	0.787	449.8	0.644			449.8	0.21	449.8	0.496	449.8	0.49
450	0.192	450	0.784	450	0.64			450	0.209	450	0.492	450	0.486
450.2	0.191	450.2	0.782	450.2	0.635			450.2	0.209	450.2	0.487	450.2	0.482
450.4	0.191	450.4	0.78	450.4	0.631			450.4	0.209	450.4	0.484	450.4	0.478
450.6	0.191	450.6	0.778	450.6	0.627			450.6	0.208	450.6	0.479	450.6	0.474
450.8	0.191	450.8	0.776	450.8	0.623			450.8	0.208	450.8	0.476	450.8	0.471
451	0.191	451	0.774	451	0.619			451	0.208	451	0.472	451	0.467
451.2	0.191	451.2	0.771	451.2	0.615			451.2	0.208	451.2	0.468	451.2	0.463
451.4	0.19	451.4	0.769	451.4	0.611			451.4	0.208	451.4	0.464	451.4	0.459
451.6	0.19	451.6	0.767	451.6	0.607			451.6	0.208	451.6	0.46	451.6	0.456
451.8	0.19	451.8	0.765	451.8	0.603			451.8	0.207	451.8	0.457	451.8	0.452
452	0.19	452	0.763	452	0.599			452	0.207	452	0.453	452	0.449
452.2	0.19	452.2	0.761	452.2	0.595			452.2	0.207	452.2	0.449	452.2	0.445
452.4	0.189	452.4	0.758	452.4	0.591			452.4	0.207	452.4	0.445	452.4	0.441
452.6	0.189	452.6	0.756	452.6	0.587			452.6	0.206	452.6	0.441	452.6	0.438
452.8	0.189	452.8	0.754	452.8	0.583			452.8	0.206	452.8	0.437	452.8	0.434
453	0.189	453	0.751	453	0.579			453	0.206	453	0.433	453	0.431
453.2	0.189	453.2	0.749	453.2	0.575			453.2	0.206	453.2	0.43	453.2	0.427
453.4	0.188	453.4	0.747	453.4	0.571			453.4	0.206	453.4	0.426	453.4	0.423
453.6	0.188	453.6	0.744	453.6	0.567			453.6	0.206	453.6	0.422	453.6	0.42
453.8	0.188	453.8	0.742	453.8	0.563			453.8	0.206	453.8	0.419	453.8	0.417
454	0.187	454	0.74	454	0.56			454	0.205	454	0.416	454	0.414
454.2	0.187	454.2	0.737	454.2	0.556			454.2	0.205	454.2	0.413	454.2	0.41
454.4	0.187	454.4	0.735	454.4	0.552			454.4	0.205	454.4	0.409	454.4	0.407
454.6	0.187	454.6	0.733	454.6	0.549			454.6	0.205	454.6	0.406	454.6	0.404
454.8	0.186	454.8	0.731	454.8	0.545			454.8	0.205	454.8	0.403	454.8	0.4
455	0.186	455	0.728	455	0.542			455	0.205	455	0.399	455	0.398
455.2	0.186	455.2	0.726	455.2	0.538			455.2	0.205	455.2	0.396	455.2	0.394
455.4	0.186	455.4	0.724	455.4	0.534			455.4	0.205	455.4	0.393	455.4	0.391
455.6	0.186	455.6	0.722	455.6	0.531			455.6	0.204	455.6	0.39	455.6	0.388
455.8	0.185	455.8	0.72	455.8	0.527			455.8	0.204	455.8	0.386	455.8	0.385
456	0.185	456	0.717	456	0.524			456	0.204	456	0.383	456	0.382
456.2	0.185	456.2	0.715	456.2	0.521			456.2	0.204	456.2	0.38	456.2	0.379
456.4	0.185	456.4	0.713	456.4	0.518			456.4	0.204	456.4	0.377	456.4	0.377
456.6	0.185	456.6	0.711	456.6	0.514			456.6	0.204	456.6	0.374	456.6	0.374
456.8	0.185	456.8	0.709	456.8	0.511			456.8	0.204	456.8	0.371	456.8	0.371
457	0.184	457	0.707	457	0.508			457	0.204	457	0.368	457	0.368
457.2	0.184	457.2	0.705	457.2	0.505			457.2	0.204	457.2	0.366	457.2	0.365
457.4	0.184	457.4	0.703	457.4	0.502			457.4	0.204	457.4	0.363	457.4	0.363
457.6	0.184	457.6	0.7	457.6	0.498			457.6	0.204	457.6	0.36	457.6	0.36
457.8	0.184	457.8	0.698	457.8	0.495			457.8	0.203	457.8	0.357	457.8	0.358
458	0.184	458	0.696	458	0.492			458	0.203	458	0.354	458	0.355
458.2	0.183	458.2	0.693	458.2	0.489			458.2	0.203	458.2	0.351	458.2	0.352
458.4	0.183	458.4	0.691	458.4	0.485			458.4	0.203	458.4	0.348	458.4	0.349
458.6	0.183	458.6	0.689	458.6	0.482			458.6	0.203	458.6	0.345	458.6	0.346
458.8	0.182	458.8	0.687	458.8	0.479			458.8	0.203	458.8	0.343	458.8	0.344
459	0.182	459	0.685	459	0.476			459	0.203	459	0.341	459	0.342
459.2	0.182	459.2	0.683	459.2	0.474			459.2	0.203	459.2	0.338	459.2	0.339
459.4	0.182	459.4	0.681	459.4	0.471			459.4	0.203	459.4	0.335	459.4	0.337
459.6	0.182	459.6	0.679	459.6	0.468			459.6	0.203	459.6	0.333	459.6	0.334
459.8	0.182	459.8	0.677	459.8	0.465			459.8	0.203	459.8	0.33	459.8	0.332
460	0.182	460	0.675	460	0.462			460	0.203	460	0.328	460	0.33
460.2	0.182	460.2	0.672	460.2	0.46			460.2	0.202	460.2	0.325	460.2	0.327
460.4	0.181	460.4	0.671	460.4	0.457			460.4	0.202	460.4	0.323	460.4	0.325
460.6	0.181	460.6	0.669	460.6	0.454			460.6	0.202	460.6	0.32	460.6	0.322
460.8	0.181	460.8	0.667	460.8	0.452			460.8	0.202	460.8	0.318	460.8	0.32
461	0.181	461	0.665	461	0.449			461	0.202	461	0.316	461	0.318
461.2	0.181	461.2	0.662	461.2	0.446			461.2	0.202	461.2	0.313	461.2	0.316
461.4	0.181	461.4	0.66	461.4	0.443			461.4	0.202	461.4	0.311	461.4	0.314
461.6	0.18	461.6	0.658	461.6	0.441			461.6	0.202	461.6	0.309	461.6	0.312
461.8	0.18	461.8	0.656	461.8	0.438			461.8	0.202	461.8	0.306	461.8	0.31
462	0.179	462	0.654	462	0.436			462	0.202	462	0.304	462	0.308
462.2	0.179	462.2	0.652	462.2	0.433			462.2	0.202	462.2	0.302	462.2	0.306
462.4	0.179	462.4	0.65	462.4	0.431			462.4	0.202	462.4	0.3	462.4	0.304
462.6	0.179	462.6	0.648	462.6	0.428			462.6	0.202	462.6	0.298	462.6	0.302
462.8	0.178	462.8	0.646	462.8	0.426			462.8	0.201	462.8	0.296	462.8	0.3
463	0.178	463	0.644	463	0.423			463	0.201	463	0.294	463	0.298
463.2	0.178	463.2	0.642	463.2	0.421			463.2	0.201	463.2	0.292	463.2	0.296
463.4	0.178	463.4	0.64	463.4	0.418			463.4	0.201	463.4	0.289	463.4	0.294
463.6	0.178	463.6	0.638	463.6	0.416			463.6	0.201	463.6	0.287	463.6	0.292
463.8	0.178	463.8	0.636	463.8	0.414			463.8	0.201	463.8	0.285	463.8	0.29
464	0.178	464	0.634	464	0.411			464	0.201	464	0.283	464	0.288
464.2	0.178	464.2	0.632	464.2	0.409			464.2	0.201	464.2	0.281	464.2	0.286
464.4	0.177	464.4	0.63	464.4	0.407			464.4	0.201	464.4	0.279	464.4	0.285
464.6	0.177	464.6	0.628	464.6	0.405			464.6	0.201	464.6	0.277	464.6	0.283
464.8	0.177	464.8	0.627	464.8	0.403			464.8	0.201	464.8	0.276	464.8	0.281
465	0.177	465	0.625	465	0.401			465	0.201	465	0.274	465	0.279
465.2	0.177	465.2	0.623	465.2	0.398			465.2	0.201	465.2	0.272	465.2	0.277
465.4	0.177	465.4	0.621	465.4	0.396			465.4	0.201	465.4	0.27	465.4	0.276
465.6	0.177	465.6	0.619	465.6	0.394			465.6	0.201	465.6	0.268	465.6	0.274
465.8	0.176	465.8	0.617	465.8	0.392			465.8	0.201	465.8	0.266	465.8	0.272
466	0.176	466	0.615	466	0.39			466	0.201	466	0.264	466	0.271
466.2	0.176	466.2	0.613	466.2	0.387			466.2	0.2	466.2	0.263	466.2	0.269
466.4	0.176	466.4	0.611	466.4	0.385			466.4	0.2	466.4	0.261	466.4	0.267
466.6	0.175	466.6	0.609	466.6	0.383			466.6	0.2	466.6	0.259	466.6	0.266
466.8	0.175	466.8	0.607	466.8	0.381			466.8	0.2	466.8	0.257	466.8	0.264
467	0.175	467	0.605	467	0.379			467	0.2	467	0.256	467	0.262
467.2	0.175	467.2	0.603	467.2	0.377			467.2	0.2	467.2	0.254	467.2	0.261
467.4	0.175	467.4	0.601	467.4	0.375			467.4	0.2	467.4	0.252	467.4	0.259
467.6	0.174	467.6	0.599	467.6	0.373			467.6	0.2	467.6	0.25	467.6	0.258
467.8	0.174	467.8	0.597	467.8	0.371			467.8	0.2	467.8	0.249	467.8	0.256
468	0.174	468	0.595	468	0.369			468	0.2	468	0.247	468	0.254
468.2	0.174	468.2	0.593	468.2	0.367			468.2	0.2	468.2	0.245	468.2	0.253
468.4	0.174	468.4	0.591	468.4	0.365			468.4	0.2	468.4	0.243	468.4	0.251
468.6	0.174	468.6	0.59	468.6	0.363			468.6	0.2	468.6	0.242	468.6	0.249
468.8	0.174	468.8	0.588	468.8	0.361			468.8	0.2	468.8	0.24	468.8	0.248
469	0.173	469	0.586	469	0.359			469	0.2	469	0.238	469	0.246
469.2	0.173	469.2	0.584	469.2	0.357			469.2	0.2	469.2	0.237	469.2	0.245
469.4	0.173	469.4	0.582	469.4	0.356			469.4	0.2	469.4	0.235	469.4	0.244
469.6	0.173	469.6	0.58	469.6	0.354			469.6	0.2	469.6	0.234	469.6	0.242
469.8	0.173	469.8	0.578	469.8	0.352			469.8	0.2	469.8	0.232	469.8	0.241
470	0.173	470	0.576	470	0.35			470	0.2	470	0.231	470	0.239
470.2	0.172	470.2	0.574	470.2	0.348			470.2	0.2	470.2	0.229	470.2	0.238
470.4	0.172	470.4	0.572	470.4	0.346			470.4	0.199	470.4	0.228	470.4	0.237
470.6	0.172	470.6	0.57	470.6	0.344			470.6	0.199	470.6	0.226	470.6	0.235
470.8	0.172	470.8	0.569	470.8	0.343			470.8	0.199	470.8	0.225	470.8	0.234
471	0.172	471	0.567	471	0.341			471	0.199	471	0.223	471	0.233
471.2	0.172	471.2	0.565	471.2	0.339			471.2	0.2	471.2	0.222	471.2	0.231
471.4	0.172	471.4	0.563	471.4	0.338			471.4	0.2	471.4	0.22	471.4	0.23
471.6	0.171	471.6	0.561	471.6	0.336			471.6	0.2	471.6	0.219	471.6	0.229
471.8	0.171	471.8	0.559	471.8	0.334			471.8	0.199	471.8	0.217	471.8	0.227
472	0.171	472	0.558	472	0.333			472	0.199	472	0.216	472	0.226
472.2	0.171	472.2	0.556	472.2	0.331			472.2	0.199	472.2	0.215	472.2	0.225
472.4	0.171	472.4	0.554	472.4	0.33			472.4	0.199	472.4	0.213	472.4	0.224
472.6	0.171	472.6	0.552	472.6	0.328			472.6	0.199	472.6	0.212	472.6	0.223
472.8	0.171	472.8	0.55	472.8	0.327			472.8	0.199	472.8	0.211	472.8	0.221
473	0.171	473	0.549	473	0.325			473	0.199	473	0.209	473	0.22
473.2	0.17	473.2	0.547	473.2	0.324			473.2	0.199	473.2	0.208	473.2	0.219
473.4	0.17	473.4	0.545	473.4	0.322			473.4	0.199	473.4	0.207	473.4	0.218
473.6	0.17	473.6	0.543	473.6	0.321			473.6	0.199	473.6	0.206	473.6	0.216
473.8	0.17	473.8	0.541	473.8	0.319			473.8	0.199	473.8	0.204	473.8	0.215
474	0.17	474	0.54	474	0.318			474	0.199	474	0.203	474	0.214
474.2	0.17	474.2	0.538	474.2	0.316			474.2	0.199	474.2	0.202	474.2	0.213
474.4	0.169	474.4	0.536	474.4	0.315			474.4	0.199	474.4	0.201	474.4	0.212
474.6	0.169	474.6	0.535	474.6	0.313			474.6	0.199	474.6	0.199	474.6	0.211
474.8	0.169	474.8	0.533	474.8	0.312			474.8	0.199	474.8	0.198	474.8	0.21
475	0.169	475	0.531	475	0.31			475	0.199	475	0.197	475	0.209
475.2	0.169	475.2	0.529	475.2	0.309			475.2	0.199	475.2	0.196	475.2	0.208
475.4	0.168	475.4	0.527	475.4	0.308			475.4	0.199	475.4	0.195	475.4	0.207
475.6	0.168	475.6	0.526	475.6	0.306			475.6	0.199	475.6	0.194	475.6	0.206
475.8	0.168	475.8	0.524	475.8	0.305			475.8	0.199	475.8	0.193	475.8	0.205
476	0.168	476	0.522	476	0.303			476	0.199	476	0.191	476	0.204
476.2	0.168	476.2	0.52	476.2	0.302			476.2	0.199	476.2	0.19	476.2	0.203
476.4	0.168	476.4	0.519	476.4	0.301			476.4	0.199	476.4	0.189	476.4	0.202
476.6	0.168	476.6	0.517	476.6	0.299			476.6	0.199	476.6	0.188	476.6	0.201
476.8	0.167	476.8	0.516	476.8	0.298			476.8	0.199	476.8	0.187	476.8	0.2
477	0.167	477	0.514	477	0.297			477	0.199	477	0.186	477	0.199
477.2	0.167	477.2	0.512	477.2	0.296			477.2	0.199	477.2	0.185	477.2	0.198
477.4	0.167	477.4	0.511	477.4	0.295			477.4	0.199	477.4	0.184	477.4	0.197
477.6	0.167	477.6	0.509	477.6	0.293			477.6	0.198	477.6	0.183	477.6	0.196
477.8	0.166	477.8	0.508	477.8	0.292			477.8	0.198	477.8	0.182	477.8	0.195
478	0.166	478	0.506	478	0.291			478	0.198	478	0.18	478	0.194
478.2	0.166	478.2	0.504	478.2	0.289			478.2	0.198	478.2	0.179	478.2	0.193
478.4	0.166	478.4	0.503	478.4	0.288			478.4	0.198	478.4	0.178	478.4	0.192
478.6	0.166	478.6	0.501	478.6	0.287			478.6	0.198	478.6	0.178	478.6	0.191
478.8	0.166	478.8	0.499	478.8	0.286			478.8	0.199	478.8	0.177	478.8	0.19
479	0.166	479	0.497	479	0.284			479	0.199	479	0.176	479	0.189
479.2	0.165	479.2	0.496	479.2	0.283			479.2	0.199	479.2	0.175	479.2	0.188
479.4	0.165	479.4	0.494	479.4	0.282			479.4	0.199	479.4	0.174	479.4	0.187
479.6	0.165	479.6	0.492	479.6	0.281			479.6	0.199	479.6	0.173	479.6	0.187
479.8	0.165	479.8	0.491	479.8	0.28			479.8	0.199	479.8	0.172	479.8	0.186
480	0.165	480	0.489	480	0.279			480	0.198	480	0.171	480	0.185
480.2	0.164	480.2	0.488	480.2	0.277			480.2	0.198	480.2	0.17	480.2	0.184
480.4	0.164	480.4	0.486	480.4	0.276			480.4	0.199	480.4	0.169	480.4	0.183
480.6	0.164	480.6	0.485	480.6	0.275			480.6	0.199	480.6	0.168	480.6	0.183
480.8	0.164	480.8	0.483	480.8	0.274			480.8	0.199	480.8	0.167	480.8	0.182
481	0.163	481	0.481	481	0.273			481	0.199	481	0.167	481	0.181
481.2	0.163	481.2	0.48	481.2	0.272			481.2	0.199	481.2	0.166	481.2	0.18
481.4	0.163	481.4	0.478	481.4	0.27			481.4	0.199	481.4	0.165	481.4	0.179
481.6	0.163	481.6	0.477	481.6	0.269			481.6	0.199	481.6	0.164	481.6	0.179
481.8	0.162	481.8	0.475	481.8	0.268			481.8	0.198	481.8	0.163	481.8	0.178
482	0.162	482	0.473	482	0.267			482	0.198	482	0.162	482	0.177
482.2	0.162	482.2	0.472	482.2	0.266			482.2	0.198	482.2	0.161	482.2	0.176
482.4	0.162	482.4	0.47	482.4	0.265			482.4	0.199	482.4	0.16	482.4	0.176
482.6	0.162	482.6	0.469	482.6	0.264			482.6	0.199	482.6	0.16	482.6	0.175
482.8	0.162	482.8	0.467	482.8	0.263			482.8	0.198	482.8	0.159	482.8	0.174
483	0.161	483	0.466	483	0.262			483	0.199	483	0.158	483	0.174
483.2	0.161	483.2	0.464	483.2	0.261			483.2	0.198	483.2	0.157	483.2	0.173
483.4	0.161	483.4	0.463	483.4	0.26			483.4	0.198	483.4	0.156	483.4	0.172
483.6	0.161	483.6	0.461	483.6	0.259			483.6	0.198	483.6	0.155	483.6	0.172
483.8	0.161	483.8	0.459	483.8	0.258			483.8	0.198	483.8	0.155	483.8	0.171
484	0.16	484	0.458	484	0.257			484	0.198	484	0.154	484	0.17
484.2	0.16	484.2	0.456	484.2	0.256			484.2	0.199	484.2	0.153	484.2	0.169
484.4	0.16	484.4	0.455	484.4	0.255			484.4	0.198	484.4	0.152	484.4	0.169
484.6	0.159	484.6	0.453	484.6	0.254			484.6	0.198	484.6	0.152	484.6	0.168
484.8	0.159	484.8	0.452	484.8	0.252			484.8	0.198	484.8	0.151	484.8	0.167
485	0.158	485	0.45	485	0.251			485	0.198	485	0.15	485	0.166
485.2	0.158	485.2	0.449	485.2	0.25			485.2	0.198	485.2	0.15	485.2	0.165
485.4	0.158	485.4	0.447	485.4	0.25			485.4	0.198	485.4	0.149	485.4	0.165
485.6	0.157	485.6	0.446	485.6	0.249			485.6	0.198	485.6	0.148	485.6	0.164
485.8	0.157	485.8	0.444	485.8	0.248			485.8	0.198	485.8	0.147	485.8	0.163
486	0.157	486	0.443	486	0.247			486	0.198	486	0.146	486	0.163
486.2	0.157	486.2	0.441	486.2	0.246			486.2	0.198	486.2	0.146	486.2	0.162
486.4	0.156	486.4	0.44	486.4	0.245			486.4	0.198	486.4	0.145	486.4	0.162
486.6	0.156	486.6	0.439	486.6	0.244			486.6	0.198	486.6	0.145	486.6	0.161
486.8	0.156	486.8	0.437	486.8	0.243			486.8	0.198	486.8	0.144	486.8	0.161
487	0.156	487	0.436	487	0.242			487	0.198	487	0.144	487	0.16
487.2	0.155	487.2	0.434	487.2	0.241			487.2	0.198	487.2	0.143	487.2	0.159
487.4	0.155	487.4	0.433	487.4	0.24			487.4	0.198	487.4	0.142	487.4	0.159
487.6	0.155	487.6	0.432	487.6	0.239			487.6	0.198	487.6	0.141	487.6	0.158
487.8	0.154	487.8	0.43	487.8	0.239			487.8	0.198	487.8	0.141	487.8	0.157
488	0.154	488	0.429	488	0.238			488	0.198	488	0.14	488	0.157
488.2	0.154	488.2	0.427	488.2	0.237			488.2	0.198	488.2	0.139	488.2	0.156
488.4	0.153	488.4	0.426	488.4	0.236			488.4	0.198	488.4	0.139	488.4	0.156
488.6	0.153	488.6	0.425	488.6	0.235			488.6	0.198	488.6	0.138	488.6	0.155
488.8	0.152	488.8	0.423	488.8	0.234			488.8	0.198	488.8	0.137	488.8	0.154
489	0.152	489	0.422	489	0.233			489	0.198	489	0.137	489	0.154
489.2	0.152	489.2	0.42	489.2	0.232			489.2	0.198	489.2	0.136	489.2	0.153
489.4	0.151	489.4	0.419	489.4	0.231			489.4	0.198	489.4	0.135	489.4	0.152
489.6	0.151	489.6	0.418	489.6	0.23			489.6	0.198	489.6	0.135	489.6	0.152
489.8	0.151	489.8	0.416	489.8	0.23			489.8	0.198	489.8	0.134	489.8	0.151
490	0.15	490	0.415	490	0.229			490	0.198	490	0.134	490	0.151
490.2	0.15	490.2	0.414	490.2	0.228			490.2	0.198	490.2	0.133	490.2	0.15
490.4	0.15	490.4	0.412	490.4	0.227			490.4	0.198	490.4	0.133	490.4	0.15
490.6	0.149	490.6	0.411	490.6	0.226			490.6	0.198	490.6	0.132	490.6	0.149
490.8	0.149	490.8	0.41	490.8	0.226			490.8	0.197	490.8	0.131	490.8	0.148
491	0.149	491	0.408	491	0.225			491	0.198	491	0.131	491	0.148
491.2	0.148	491.2	0.407	491.2	0.224			491.2	0.197	491.2	0.13	491.2	0.147
491.4	0.148	491.4	0.406	491.4	0.223			491.4	0.197	491.4	0.129	491.4	0.147
491.6	0.147	491.6	0.405	491.6	0.222			491.6	0.197	491.6	0.129	491.6	0.146
491.8	0.147	491.8	0.404	491.8	0.221			491.8	0.197	491.8	0.128	491.8	0.146
492	0.147	492	0.402	492	0.221			492	0.197	492	0.128	492	0.145
492.2	0.146	492.2	0.401	492.2	0.22			492.2	0.197	492.2	0.127	492.2	0.145
492.4	0.146	492.4	0.4	492.4	0.219			492.4	0.197	492.4	0.127	492.4	0.144
492.6	0.146	492.6	0.398	492.6	0.218			492.6	0.197	492.6	0.126	492.6	0.144
492.8	0.145	492.8	0.397	492.8	0.218			492.8	0.197	492.8	0.125	492.8	0.143
493	0.145	493	0.396	493	0.217			493	0.197	493	0.125	493	0.143
493.2	0.145	493.2	0.395	493.2	0.216			493.2	0.197	493.2	0.124	493.2	0.142
493.4	0.144	493.4	0.394	493.4	0.215			493.4	0.197	493.4	0.124	493.4	0.142
493.6	0.144	493.6	0.392	493.6	0.215			493.6	0.197	493.6	0.123	493.6	0.141
493.8	0.144	493.8	0.391	493.8	0.214			493.8	0.197	493.8	0.123	493.8	0.141
494	0.143	494	0.39	494	0.213			494	0.197	494	0.123	494	0.14
494.2	0.143	494.2	0.389	494.2	0.212			494.2	0.197	494.2	0.122	494.2	0.14
494.4	0.143	494.4	0.388	494.4	0.212			494.4	0.197	494.4	0.122	494.4	0.139
494.6	0.142	494.6	0.386	494.6	0.211			494.6	0.198	494.6	0.121	494.6	0.139
494.8	0.142	494.8	0.385	494.8	0.21			494.8	0.197	494.8	0.12	494.8	0.139
495	0.142	495	0.384	495	0.209			495	0.198	495	0.12	495	0.138
495.2	0.141	495.2	0.383	495.2	0.209			495.2	0.197	495.2	0.119	495.2	0.138
495.4	0.141	495.4	0.382	495.4	0.208			495.4	0.197	495.4	0.119	495.4	0.137
495.6	0.14	495.6	0.381	495.6	0.207			495.6	0.197	495.6	0.119	495.6	0.137
495.8	0.14	495.8	0.379	495.8	0.207			495.8	0.197	495.8	0.118	495.8	0.136
496	0.14	496	0.378	496	0.206			496	0.197	496	0.118	496	0.136
496.2	0.139	496.2	0.377	496.2	0.205			496.2	0.197	496.2	0.117	496.2	0.135
496.4	0.139	496.4	0.376	496.4	0.204			496.4	0.197	496.4	0.117	496.4	0.135
496.6	0.138	496.6	0.375	496.6	0.204			496.6	0.197	496.6	0.116	496.6	0.135
496.8	0.138	496.8	0.374	496.8	0.203			496.8	0.197	496.8	0.116	496.8	0.134
497	0.138	497	0.372	497	0.202			497	0.197	497	0.115	497	0.134
497.2	0.137	497.2	0.371	497.2	0.202			497.2	0.197	497.2	0.115	497.2	0.133
497.4	0.137	497.4	0.371	497.4	0.201			497.4	0.197	497.4	0.115	497.4	0.133
497.6	0.137	497.6	0.369	497.6	0.2			497.6	0.197	497.6	0.114	497.6	0.132
497.8	0.136	497.8	0.368	497.8	0.199			497.8	0.197	497.8	0.114	497.8	0.132
498	0.136	498	0.367	498	0.199			498	0.197	498	0.113	498	0.131
498.2	0.136	498.2	0.366	498.2	0.198			498.2	0.197	498.2	0.113	498.2	0.131
498.4	0.135	498.4	0.365	498.4	0.197			498.4	0.197	498.4	0.112	498.4	0.131
498.6	0.135	498.6	0.364	498.6	0.197			498.6	0.197	498.6	0.112	498.6	0.13
498.8	0.135	498.8	0.363	498.8	0.196			498.8	0.197	498.8	0.111	498.8	0.13
499	0.134	499	0.362	499	0.196			499	0.197	499	0.111	499	0.129
499.2	0.134	499.2	0.361	499.2	0.195			499.2	0.197	499.2	0.11	499.2	0.129
499.4	0.134	499.4	0.36	499.4	0.194			499.4	0.197	499.4	0.11	499.4	0.128
499.6	0.133	499.6	0.359	499.6	0.194			499.6	0.197	499.6	0.11	499.6	0.128
499.8	0.133	499.8	0.358	499.8	0.193			499.8	0.197	499.8	0.109	499.8	0.127
500	0.132	500	0.357	500	0.192			500	0.197	500	0.109	500	0.127
500.2	0.132	500.2	0.356	500.2	0.192			500.2	0.197	500.2	0.109	500.2	0.127
500.4	0.132	500.4	0.355	500.4	0.191			500.4	0.196	500.4	0.108	500.4	0.126
500.6	0.131	500.6	0.354	500.6	0.191			500.6	0.196	500.6	0.108	500.6	0.126
500.8	0.131	500.8	0.353	500.8	0.19			500.8	0.196	500.8	0.107	500.8	0.126
501	0.131	501	0.352	501	0.189			501	0.196	501	0.107	501	0.125
501.2	0.13	501.2	0.351	501.2	0.189			501.2	0.196	501.2	0.106	501.2	0.125
501.4	0.13	501.4	0.35	501.4	0.188			501.4	0.196	501.4	0.106	501.4	0.124
501.6	0.13	501.6	0.349	501.6	0.188			501.6	0.196	501.6	0.106	501.6	0.124
501.8	0.13	501.8	0.348	501.8	0.187			501.8	0.196	501.8	0.106	501.8	0.124
502	0.129	502	0.347	502	0.187			502	0.196	502	0.105	502	0.123
502.2	0.129	502.2	0.346	502.2	0.186			502.2	0.196	502.2	0.105	502.2	0.123
502.4	0.129	502.4	0.345	502.4	0.186			502.4	0.196	502.4	0.104	502.4	0.123
502.6	0.128	502.6	0.344	502.6	0.185			502.6	0.196	502.6	0.104	502.6	0.122
502.8	0.128	502.8	0.343	502.8	0.184			502.8	0.196	502.8	0.104	502.8	0.122
503	0.128	503	0.342	503	0.184			503	0.196	503	0.103	503	0.121
503.2	0.127	503.2	0.341	503.2	0.183			503.2	0.196	503.2	0.103	503.2	0.121
503.4	0.127	503.4	0.34	503.4	0.183			503.4	0.196	503.4	0.103	503.4	0.121
503.6	0.127	503.6	0.339	503.6	0.182			503.6	0.196	503.6	0.102	503.6	0.12
503.8	0.126	503.8	0.338	503.8	0.181			503.8	0.196	503.8	0.102	503.8	0.12
504	0.126	504	0.337	504	0.181			504	0.196	504	0.102	504	0.119
504.2	0.126	504.2	0.336	504.2	0.18			504.2	0.196	504.2	0.101	504.2	0.119
504.4	0.125	504.4	0.335	504.4	0.18			504.4	0.196	504.4	0.101	504.4	0.119
504.6	0.125	504.6	0.334	504.6	0.179			504.6	0.196	504.6	0.1	504.6	0.118
504.8	0.125	504.8	0.333	504.8	0.178			504.8	0.196	504.8	0.1	504.8	0.118
505	0.125	505	0.333	505	0.178			505	0.196	505	0.1	505	0.118
505.2	0.125	505.2	0.332	505.2	0.177			505.2	0.196	505.2	0.099	505.2	0.117
505.4	0.124	505.4	0.331	505.4	0.177			505.4	0.196	505.4	0.099	505.4	0.117
505.6	0.124	505.6	0.33	505.6	0.177			505.6	0.196	505.6	0.099	505.6	0.117
505.8	0.124	505.8	0.329	505.8	0.176			505.8	0.196	505.8	0.098	505.8	0.116
506	0.124	506	0.328	506	0.176			506	0.196	506	0.098	506	0.116
506.2	0.123	506.2	0.327	506.2	0.175			506.2	0.195	506.2	0.098	506.2	0.116
506.4	0.123	506.4	0.326	506.4	0.174			506.4	0.196	506.4	0.097	506.4	0.115
506.6	0.123	506.6	0.326	506.6	0.174			506.6	0.195	506.6	0.097	506.6	0.115
506.8	0.123	506.8	0.325	506.8	0.173			506.8	0.195	506.8	0.097	506.8	0.115
507	0.122	507	0.324	507	0.173			507	0.196	507	0.096	507	0.114
507.2	0.122	507.2	0.323	507.2	0.172			507.2	0.195	507.2	0.096	507.2	0.114
507.4	0.122	507.4	0.322	507.4	0.172			507.4	0.195	507.4	0.096	507.4	0.113
507.6	0.122	507.6	0.321	507.6	0.171			507.6	0.195	507.6	0.096	507.6	0.113
507.8	0.121	507.8	0.32	507.8	0.171			507.8	0.195	507.8	0.095	507.8	0.113
508	0.121	508	0.319	508	0.17			508	0.195	508	0.095	508	0.112
508.2	0.121	508.2	0.319	508.2	0.17			508.2	0.195	508.2	0.094	508.2	0.112
508.4	0.121	508.4	0.318	508.4	0.169			508.4	0.195	508.4	0.094	508.4	0.112
508.6	0.12	508.6	0.317	508.6	0.169			508.6	0.195	508.6	0.094	508.6	0.111
508.8	0.12	508.8	0.316	508.8	0.168			508.8	0.195	508.8	0.094	508.8	0.111
509	0.12	509	0.315	509	0.167			509	0.195	509	0.093	509	0.111
509.2	0.12	509.2	0.314	509.2	0.167			509.2	0.195	509.2	0.093	509.2	0.11
509.4	0.12	509.4	0.313	509.4	0.167			509.4	0.195	509.4	0.092	509.4	0.11
509.6	0.12	509.6	0.312	509.6	0.166			509.6	0.195	509.6	0.092	509.6	0.11
509.8	0.12	509.8	0.311	509.8	0.166			509.8	0.195	509.8	0.092	509.8	0.109
510	0.119	510	0.311	510	0.165			510	0.195	510	0.092	510	0.109
510.2	0.119	510.2	0.31	510.2	0.165			510.2	0.195	510.2	0.091	510.2	0.109
510.4	0.119	510.4	0.309	510.4	0.164			510.4	0.195	510.4	0.091	510.4	0.108
510.6	0.119	510.6	0.308	510.6	0.164			510.6	0.195	510.6	0.091	510.6	0.108
510.8	0.118	510.8	0.307	510.8	0.163			510.8	0.195	510.8	0.09	510.8	0.108
511	0.118	511	0.306	511	0.163			511	0.195	511	0.09	511	0.107
511.2	0.118	511.2	0.306	511.2	0.162			511.2	0.195	511.2	0.09	511.2	0.107
511.4	0.118	511.4	0.305	511.4	0.161			511.4	0.195	511.4	0.09	511.4	0.107
511.6	0.118	511.6	0.304	511.6	0.161			511.6	0.195	511.6	0.089	511.6	0.106
511.8	0.118	511.8	0.303	511.8	0.16			511.8	0.195	511.8	0.089	511.8	0.106
512	0.117	512	0.302	512	0.16			512	0.195	512	0.089	512	0.106
512.2	0.117	512.2	0.301	512.2	0.159			512.2	0.195	512.2	0.089	512.2	0.105
512.4	0.117	512.4	0.3	512.4	0.159			512.4	0.195	512.4	0.088	512.4	0.105
512.6	0.117	512.6	0.3	512.6	0.159			512.6	0.195	512.6	0.088	512.6	0.105
512.8	0.117	512.8	0.299	512.8	0.158			512.8	0.195	512.8	0.088	512.8	0.104
513	0.117	513	0.298	513	0.158			513	0.195	513	0.088	513	0.104
513.2	0.117	513.2	0.297	513.2	0.157			513.2	0.194	513.2	0.087	513.2	0.104
513.4	0.116	513.4	0.296	513.4	0.157			513.4	0.194	513.4	0.087	513.4	0.104
513.6	0.116	513.6	0.296	513.6	0.156			513.6	0.194	513.6	0.087	513.6	0.103
513.8	0.116	513.8	0.295	513.8	0.156			513.8	0.194	513.8	0.086	513.8	0.103
514	0.116	514	0.294	514	0.155			514	0.194	514	0.086	514	0.102
514.2	0.116	514.2	0.293	514.2	0.155			514.2	0.194	514.2	0.086	514.2	0.102
514.4	0.116	514.4	0.292	514.4	0.154			514.4	0.194	514.4	0.086	514.4	0.102
514.6	0.116	514.6	0.292	514.6	0.154			514.6	0.194	514.6	0.085	514.6	0.102
514.8	0.116	514.8	0.291	514.8	0.153			514.8	0.194	514.8	0.085	514.8	0.101
515	0.116	515	0.29	515	0.153			515	0.194	515	0.085	515	0.101
515.2	0.116	515.2	0.289	515.2	0.153			515.2	0.194	515.2	0.085	515.2	0.101
515.4	0.116	515.4	0.289	515.4	0.152			515.4	0.194	515.4	0.085	515.4	0.101
515.6	0.116	515.6	0.288	515.6	0.152			515.6	0.194	515.6	0.084	515.6	0.1
515.8	0.115	515.8	0.287	515.8	0.151			515.8	0.194	515.8	0.084	515.8	0.1
516	0.115	516	0.286	516	0.151			516	0.194	516	0.084	516	0.1
516.2	0.115	516.2	0.286	516.2	0.151			516.2	0.194	516.2	0.084	516.2	0.099
516.4	0.115	516.4	0.285	516.4	0.15			516.4	0.194	516.4	0.083	516.4	0.099
516.6	0.115	516.6	0.284	516.6	0.15			516.6	0.194	516.6	0.083	516.6	0.099
516.8	0.115	516.8	0.283	516.8	0.149			516.8	0.194	516.8	0.083	516.8	0.098
517	0.115	517	0.283	517	0.148			517	0.194	517	0.082	517	0.098
517.2	0.114	517.2	0.282	517.2	0.148			517.2	0.194	517.2	0.082	517.2	0.098
517.4	0.114	517.4	0.281	517.4	0.148			517.4	0.194	517.4	0.082	517.4	0.098
517.6	0.114	517.6	0.28	517.6	0.147			517.6	0.194	517.6	0.082	517.6	0.097
517.8	0.114	517.8	0.279	517.8	0.147			517.8	0.194	517.8	0.082	517.8	0.097
518	0.114	518	0.279	518	0.146			518	0.194	518	0.081	518	0.097
518.2	0.114	518.2	0.278	518.2	0.146			518.2	0.194	518.2	0.081	518.2	0.097
518.4	0.114	518.4	0.277	518.4	0.146			518.4	0.194	518.4	0.081	518.4	0.096
518.6	0.114	518.6	0.276	518.6	0.145			518.6	0.194	518.6	0.081	518.6	0.096
518.8	0.114	518.8	0.276	518.8	0.145			518.8	0.194	518.8	0.08	518.8	0.096
519	0.114	519	0.275	519	0.144			519	0.194	519	0.08	519	0.096
519.2	0.114	519.2	0.274	519.2	0.144			519.2	0.194	519.2	0.08	519.2	0.095
519.4	0.114	519.4	0.273	519.4	0.143			519.4	0.193	519.4	0.079	519.4	0.095
519.6	0.114	519.6	0.272	519.6	0.143			519.6	0.193	519.6	0.079	519.6	0.095
519.8	0.113	519.8	0.272	519.8	0.142			519.8	0.193	519.8	0.079	519.8	0.094
520	0.113	520	0.271	520	0.142			520	0.193	520	0.079	520	0.094
520.2	0.113	520.2	0.27	520.2	0.142			520.2	0.193	520.2	0.079	520.2	0.094
520.4	0.113	520.4	0.27	520.4	0.141			520.4	0.193	520.4	0.079	520.4	0.094
520.6	0.113	520.6	0.269	520.6	0.141			520.6	0.193	520.6	0.078	520.6	0.093
520.8	0.113	520.8	0.268	520.8	0.14			520.8	0.194	520.8	0.078	520.8	0.093
521	0.113	521	0.268	521	0.14			521	0.194	521	0.078	521	0.093
521.2	0.113	521.2	0.267	521.2	0.14			521.2	0.193	521.2	0.078	521.2	0.093
521.4	0.113	521.4	0.266	521.4	0.139			521.4	0.194	521.4	0.078	521.4	0.093
521.6	0.113	521.6	0.266	521.6	0.139			521.6	0.194	521.6	0.077	521.6	0.093
521.8	0.113	521.8	0.265	521.8	0.139			521.8	0.194	521.8	0.077	521.8	0.092
522	0.113	522	0.264	522	0.138			522	0.194	522	0.077	522	0.092
522.2	0.113	522.2	0.264	522.2	0.138			522.2	0.193	522.2	0.077	522.2	0.092
522.4	0.113	522.4	0.263	522.4	0.137			522.4	0.193	522.4	0.077	522.4	0.092
522.6	0.113	522.6	0.262	522.6	0.137			522.6	0.193	522.6	0.077	522.6	0.092
522.8	0.112	522.8	0.261	522.8	0.137			522.8	0.193	522.8	0.076	522.8	0.091
523	0.112	523	0.261	523	0.136			523	0.193	523	0.076	523	0.091
523.2	0.112	523.2	0.26	523.2	0.136			523.2	0.193	523.2	0.076	523.2	0.091
523.4	0.112	523.4	0.259	523.4	0.135			523.4	0.193	523.4	0.076	523.4	0.091
523.6	0.112	523.6	0.258	523.6	0.135			523.6	0.193	523.6	0.076	523.6	0.09
523.8	0.112	523.8	0.258	523.8	0.135			523.8	0.193	523.8	0.075	523.8	0.09
524	0.112	524	0.257	524	0.134			524	0.193	524	0.075	524	0.09
524.2	0.112	524.2	0.256	524.2	0.134			524.2	0.193	524.2	0.075	524.2	0.09
524.4	0.112	524.4	0.256	524.4	0.133			524.4	0.193	524.4	0.075	524.4	0.09
524.6	0.112	524.6	0.255	524.6	0.133			524.6	0.193	524.6	0.075	524.6	0.089
524.8	0.112	524.8	0.254	524.8	0.133			524.8	0.193	524.8	0.074	524.8	0.089
525	0.112	525	0.254	525	0.132			525	0.193	525	0.074	525	0.089
525.2	0.112	525.2	0.253	525.2	0.132			525.2	0.193	525.2	0.074	525.2	0.089
525.4	0.112	525.4	0.252	525.4	0.132			525.4	0.193	525.4	0.074	525.4	0.088
525.6	0.112	525.6	0.251	525.6	0.131			525.6	0.193	525.6	0.074	525.6	0.088
525.8	0.112	525.8	0.251	525.8	0.131			525.8	0.193	525.8	0.074	525.8	0.088
526	0.112	526	0.25	526	0.131			526	0.193	526	0.074	526	0.088
526.2	0.112	526.2	0.25	526.2	0.13			526.2	0.193	526.2	0.073	526.2	0.087
526.4	0.112	526.4	0.249	526.4	0.13			526.4	0.193	526.4	0.073	526.4	0.087
526.6	0.112	526.6	0.248	526.6	0.13			526.6	0.193	526.6	0.073	526.6	0.087
526.8	0.112	526.8	0.248	526.8	0.129			526.8	0.193	526.8	0.073	526.8	0.087
527	0.112	527	0.247	527	0.129			527	0.193	527	0.072	527	0.087
527.2	0.112	527.2	0.246	527.2	0.129			527.2	0.193	527.2	0.072	527.2	0.087
527.4	0.112	527.4	0.246	527.4	0.128			527.4	0.193	527.4	0.072	527.4	0.086
527.6	0.112	527.6	0.245	527.6	0.128			527.6	0.193	527.6	0.072	527.6	0.086
527.8	0.112	527.8	0.244	527.8	0.127			527.8	0.192	527.8	0.072	527.8	0.086
528	0.112	528	0.244	528	0.127			528	0.192	528	0.072	528	0.086
528.2	0.112	528.2	0.243	528.2	0.127			528.2	0.192	528.2	0.072	528.2	0.086
528.4	0.112	528.4	0.242	528.4	0.126			528.4	0.192	528.4	0.071	528.4	0.085
528.6	0.112	528.6	0.241	528.6	0.126			528.6	0.192	528.6	0.071	528.6	0.085
528.8	0.112	528.8	0.241	528.8	0.126			528.8	0.192	528.8	0.071	528.8	0.085
529	0.112	529	0.24	529	0.126			529	0.192	529	0.071	529	0.085
529.2	0.112	529.2	0.24	529.2	0.125			529.2	0.192	529.2	0.071	529.2	0.085
529.4	0.112	529.4	0.24	529.4	0.125			529.4	0.192	529.4	0.071	529.4	0.084
529.6	0.112	529.6	0.239	529.6	0.124			529.6	0.192	529.6	0.07	529.6	0.084
529.8	0.112	529.8	0.238	529.8	0.124			529.8	0.192	529.8	0.07	529.8	0.084
530	0.112	530	0.238	530	0.124			530	0.192	530	0.07	530	0.083
530.2	0.112	530.2	0.237	530.2	0.123			530.2	0.192	530.2	0.07	530.2	0.083
530.4	0.112	530.4	0.236	530.4	0.123			530.4	0.191	530.4	0.07	530.4	0.083
530.6	0.112	530.6	0.236	530.6	0.123			530.6	0.191	530.6	0.07	530.6	0.083
530.8	0.112	530.8	0.235	530.8	0.122			530.8	0.191	530.8	0.069	530.8	0.083
531	0.112	531	0.234	531	0.122			531	0.191	531	0.069	531	0.082
531.2	0.112	531.2	0.234	531.2	0.122			531.2	0.191	531.2	0.069	531.2	0.082
531.4	0.112	531.4	0.233	531.4	0.121			531.4	0.191	531.4	0.069	531.4	0.082
531.6	0.112	531.6	0.232	531.6	0.121			531.6	0.191	531.6	0.069	531.6	0.082
531.8	0.112	531.8	0.232	531.8	0.121			531.8	0.191	531.8	0.069	531.8	0.082
532	0.112	532	0.231	532	0.12			532	0.191	532	0.069	532	0.082
532.2	0.112	532.2	0.231	532.2	0.12			532.2	0.191	532.2	0.068	532.2	0.081
532.4	0.112	532.4	0.23	532.4	0.12			532.4	0.191	532.4	0.068	532.4	0.081
532.6	0.112	532.6	0.229	532.6	0.12			532.6	0.191	532.6	0.068	532.6	0.081
532.8	0.112	532.8	0.229	532.8	0.119			532.8	0.191	532.8	0.068	532.8	0.081
533	0.112	533	0.228	533	0.119			533	0.19	533	0.068	533	0.081
533.2	0.112	533.2	0.228	533.2	0.118			533.2	0.19	533.2	0.067	533.2	0.08
533.4	0.112	533.4	0.227	533.4	0.118			533.4	0.19	533.4	0.067	533.4	0.08
533.6	0.112	533.6	0.226	533.6	0.118			533.6	0.19	533.6	0.067	533.6	0.08
533.8	0.112	533.8	0.226	533.8	0.117			533.8	0.19	533.8	0.067	533.8	0.08
534	0.112	534	0.225	534	0.117			534	0.19	534	0.067	534	0.079
534.2	0.112	534.2	0.225	534.2	0.117			534.2	0.19	534.2	0.067	534.2	0.079
534.4	0.112	534.4	0.224	534.4	0.117			534.4	0.19	534.4	0.067	534.4	0.079
534.6	0.112	534.6	0.224	534.6	0.116			534.6	0.19	534.6	0.067	534.6	0.079
534.8	0.113	534.8	0.223	534.8	0.116			534.8	0.19	534.8	0.067	534.8	0.079
535	0.113	535	0.222	535	0.116			535	0.19	535	0.067	535	0.079
535.2	0.113	535.2	0.222	535.2	0.115			535.2	0.19	535.2	0.066	535.2	0.078
535.4	0.113	535.4	0.221	535.4	0.115			535.4	0.19	535.4	0.066	535.4	0.078
535.6	0.113	535.6	0.22	535.6	0.115			535.6	0.19	535.6	0.066	535.6	0.078
535.8	0.113	535.8	0.22	535.8	0.115			535.8	0.19	535.8	0.066	535.8	0.078
536	0.113	536	0.219	536	0.114			536	0.19	536	0.066	536	0.077
536.2	0.113	536.2	0.219	536.2	0.114			536.2	0.19	536.2	0.066	536.2	0.077
536.4	0.113	536.4	0.218	536.4	0.114			536.4	0.19	536.4	0.066	536.4	0.077
536.6	0.113	536.6	0.218	536.6	0.114			536.6	0.19	536.6	0.066	536.6	0.077
536.8	0.113	536.8	0.217	536.8	0.113			536.8	0.19	536.8	0.066	536.8	0.077
537	0.114	537	0.216	537	0.113			537	0.19	537	0.066	537	0.077
537.2	0.114	537.2	0.216	537.2	0.112			537.2	0.19	537.2	0.065	537.2	0.077
537.4	0.114	537.4	0.215	537.4	0.112			537.4	0.19	537.4	0.065	537.4	0.076
537.6	0.114	537.6	0.214	537.6	0.112			537.6	0.19	537.6	0.065	537.6	0.076
537.8	0.114	537.8	0.214	537.8	0.111			537.8	0.189	537.8	0.065	537.8	0.076
538	0.114	538	0.213	538	0.111			538	0.189	538	0.065	538	0.076
538.2	0.114	538.2	0.213	538.2	0.111			538.2	0.189	538.2	0.064	538.2	0.076
538.4	0.114	538.4	0.212	538.4	0.111			538.4	0.189	538.4	0.064	538.4	0.076
538.6	0.114	538.6	0.211	538.6	0.111			538.6	0.189	538.6	0.064	538.6	0.075
538.8	0.114	538.8	0.211	538.8	0.11			538.8	0.189	538.8	0.064	538.8	0.075
539	0.114	539	0.21	539	0.11			539	0.189	539	0.064	539	0.075
539.2	0.114	539.2	0.21	539.2	0.11			539.2	0.188	539.2	0.064	539.2	0.074
539.4	0.114	539.4	0.209	539.4	0.11			539.4	0.188	539.4	0.064	539.4	0.074
539.6	0.115	539.6	0.209	539.6	0.109			539.6	0.188	539.6	0.064	539.6	0.074
539.8	0.115	539.8	0.208	539.8	0.109			539.8	0.188	539.8	0.063	539.8	0.074
540	0.115	540	0.208	540	0.109			540	0.188	540	0.063	540	0.074
540.2	0.115	540.2	0.207	540.2	0.108			540.2	0.188	540.2	0.063	540.2	0.074
540.4	0.115	540.4	0.206	540.4	0.108			540.4	0.188	540.4	0.063	540.4	0.073
540.6	0.115	540.6	0.206	540.6	0.108			540.6	0.188	540.6	0.063	540.6	0.073
540.8	0.115	540.8	0.206	540.8	0.108			540.8	0.188	540.8	0.063	540.8	0.073
541	0.115	541	0.205	541	0.107			541	0.187	541	0.063	541	0.073
541.2	0.115	541.2	0.204	541.2	0.107			541.2	0.187	541.2	0.063	541.2	0.073
541.4	0.115	541.4	0.204	541.4	0.107			541.4	0.187	541.4	0.062	541.4	0.073
541.6	0.116	541.6	0.203	541.6	0.106			541.6	0.187	541.6	0.062	541.6	0.073
541.8	0.116	541.8	0.202	541.8	0.106			541.8	0.187	541.8	0.062	541.8	0.072
542	0.116	542	0.202	542	0.106			542	0.187	542	0.062	542	0.072
542.2	0.116	542.2	0.201	542.2	0.106			542.2	0.187	542.2	0.062	542.2	0.072
542.4	0.116	542.4	0.201	542.4	0.105			542.4	0.187	542.4	0.062	542.4	0.072
542.6	0.116	542.6	0.2	542.6	0.105			542.6	0.187	542.6	0.062	542.6	0.071
542.8	0.116	542.8	0.2	542.8	0.105			542.8	0.187	542.8	0.062	542.8	0.071
543	0.116	543	0.199	543	0.105			543	0.187	543	0.061	543	0.071
543.2	0.116	543.2	0.199	543.2	0.104			543.2	0.187	543.2	0.061	543.2	0.071
543.4	0.116	543.4	0.198	543.4	0.104			543.4	0.187	543.4	0.061	543.4	0.071
543.6	0.117	543.6	0.197	543.6	0.104			543.6	0.186	543.6	0.061	543.6	0.071
543.8	0.117	543.8	0.197	543.8	0.104			543.8	0.186	543.8	0.061	543.8	0.071
544	0.117	544	0.196	544	0.104			544	0.186	544	0.06	544	0.07
544.2	0.117	544.2	0.196	544.2	0.103			544.2	0.186	544.2	0.06	544.2	0.07
544.4	0.117	544.4	0.195	544.4	0.103			544.4	0.186	544.4	0.06	544.4	0.07
544.6	0.117	544.6	0.195	544.6	0.103			544.6	0.186	544.6	0.06	544.6	0.07
544.8	0.117	544.8	0.194	544.8	0.103			544.8	0.185	544.8	0.06	544.8	0.07
545	0.117	545	0.193	545	0.102			545	0.185	545	0.06	545	0.069
545.2	0.117	545.2	0.193	545.2	0.102			545.2	0.185	545.2	0.06	545.2	0.069
545.4	0.117	545.4	0.192	545.4	0.102			545.4	0.185	545.4	0.06	545.4	0.069
545.6	0.117	545.6	0.192	545.6	0.101			545.6	0.185	545.6	0.06	545.6	0.069
545.8	0.117	545.8	0.191	545.8	0.101			545.8	0.185	545.8	0.059	545.8	0.069
546	0.117	546	0.191	546	0.101			546	0.185	546	0.059	546	0.069
546.2	0.117	546.2	0.19	546.2	0.101			546.2	0.185	546.2	0.059	546.2	0.069
546.4	0.118	546.4	0.19	546.4	0.1			546.4	0.185	546.4	0.059	546.4	0.068
546.6	0.118	546.6	0.19	546.6	0.1			546.6	0.185	546.6	0.059	546.6	0.068
546.8	0.118	546.8	0.189	546.8	0.1			546.8	0.185	546.8	0.058	546.8	0.068
547	0.118	547	0.189	547	0.1			547	0.185	547	0.058	547	0.068
547.2	0.118	547.2	0.188	547.2	0.1			547.2	0.184	547.2	0.058	547.2	0.068
547.4	0.118	547.4	0.187	547.4	0.099			547.4	0.184	547.4	0.058	547.4	0.068
547.6	0.118	547.6	0.187	547.6	0.099			547.6	0.184	547.6	0.058	547.6	0.068
547.8	0.118	547.8	0.186	547.8	0.099			547.8	0.184	547.8	0.058	547.8	0.067
548	0.118	548	0.186	548	0.099			548	0.184	548	0.058	548	0.067
548.2	0.118	548.2	0.185	548.2	0.098			548.2	0.184	548.2	0.058	548.2	0.067
548.4	0.118	548.4	0.185	548.4	0.098			548.4	0.184	548.4	0.058	548.4	0.067
548.6	0.118	548.6	0.184	548.6	0.098			548.6	0.184	548.6	0.057	548.6	0.067
548.8	0.118	548.8	0.183	548.8	0.097			548.8	0.184	548.8	0.057	548.8	0.067
549	0.118	549	0.183	549	0.097			549	0.184	549	0.057	549	0.067
549.2	0.118	549.2	0.182	549.2	0.097			549.2	0.184	549.2	0.057	549.2	0.067
549.4	0.118	549.4	0.182	549.4	0.097			549.4	0.183	549.4	0.057	549.4	0.067
549.6	0.118	549.6	0.181	549.6	0.097			549.6	0.183	549.6	0.057	549.6	0.066
549.8	0.118	549.8	0.181	549.8	0.096			549.8	0.183	549.8	0.056	549.8	0.066
550	0.118	550	0.181	550	0.096			550	0.183	550	0.056	550	0.066
550.2	0.118	550.2	0.18	550.2	0.096			550.2	0.183	550.2	0.056	550.2	0.066
550.4	0.118	550.4	0.18	550.4	0.096			550.4	0.183	550.4	0.056	550.4	0.065
550.6	0.118	550.6	0.179	550.6	0.096			550.6	0.183	550.6	0.056	550.6	0.065
550.8	0.118	550.8	0.179	550.8	0.096			550.8	0.183	550.8	0.056	550.8	0.065
551	0.118	551	0.178	551	0.095			551	0.183	551	0.055	551	0.065
551.2	0.118	551.2	0.178	551.2	0.095			551.2	0.183	551.2	0.055	551.2	0.065
551.4	0.118	551.4	0.177	551.4	0.095			551.4	0.183	551.4	0.055	551.4	0.065
551.6	0.118	551.6	0.177	551.6	0.095			551.6	0.183	551.6	0.055	551.6	0.065
551.8	0.118	551.8	0.176	551.8	0.094			551.8	0.183	551.8	0.055	551.8	0.065
552	0.118	552	0.176	552	0.094			552	0.182	552	0.055	552	0.065
552.2	0.118	552.2	0.175	552.2	0.094			552.2	0.182	552.2	0.055	552.2	0.065
552.4	0.118	552.4	0.175	552.4	0.094			552.4	0.182	552.4	0.055	552.4	0.064
552.6	0.118	552.6	0.174	552.6	0.093			552.6	0.182	552.6	0.055	552.6	0.064
552.8	0.118	552.8	0.174	552.8	0.093			552.8	0.182	552.8	0.055	552.8	0.064
553	0.118	553	0.173	553	0.093			553	0.182	553	0.054	553	0.064
553.2	0.118	553.2	0.173	553.2	0.093			553.2	0.182	553.2	0.054	553.2	0.064
553.4	0.118	553.4	0.172	553.4	0.093			553.4	0.182	553.4	0.054	553.4	0.064
553.6	0.118	553.6	0.172	553.6	0.093			553.6	0.182	553.6	0.054	553.6	0.063
553.8	0.118	553.8	0.171	553.8	0.092			553.8	0.182	553.8	0.054	553.8	0.063
554	0.118	554	0.171	554	0.092			554	0.182	554	0.054	554	0.063
554.2	0.118	554.2	0.17	554.2	0.092			554.2	0.181	554.2	0.054	554.2	0.063
554.4	0.118	554.4	0.17	554.4	0.092			554.4	0.181	554.4	0.054	554.4	0.063
554.6	0.118	554.6	0.169	554.6	0.092			554.6	0.181	554.6	0.054	554.6	0.063
554.8	0.118	554.8	0.169	554.8	0.091			554.8	0.181	554.8	0.054	554.8	0.063
555	0.118	555	0.168	555	0.091			555	0.181	555	0.053	555	0.063
555.2	0.118	555.2	0.168	555.2	0.091			555.2	0.181	555.2	0.053	555.2	0.063
555.4	0.118	555.4	0.167	555.4	0.091			555.4	0.181	555.4	0.053	555.4	0.063
555.6	0.118	555.6	0.167	555.6	0.091			555.6	0.181	555.6	0.053	555.6	0.063
555.8	0.118	555.8	0.167	555.8	0.09			555.8	0.181	555.8	0.053	555.8	0.062
556	0.118	556	0.166	556	0.09			556	0.181	556	0.053	556	0.062
556.2	0.118	556.2	0.166	556.2	0.09			556.2	0.181	556.2	0.053	556.2	0.062
556.4	0.118	556.4	0.165	556.4	0.09			556.4	0.18	556.4	0.053	556.4	0.062
556.6	0.118	556.6	0.165	556.6	0.09			556.6	0.18	556.6	0.052	556.6	0.062
556.8	0.118	556.8	0.164	556.8	0.089			556.8	0.18	556.8	0.052	556.8	0.062
557	0.118	557	0.164	557	0.089			557	0.18	557	0.052	557	0.062
557.2	0.118	557.2	0.164	557.2	0.089			557.2	0.18	557.2	0.052	557.2	0.062
557.4	0.117	557.4	0.163	557.4	0.089			557.4	0.18	557.4	0.052	557.4	0.061
557.6	0.117	557.6	0.163	557.6	0.089			557.6	0.18	557.6	0.052	557.6	0.061
557.8	0.118	557.8	0.162	557.8	0.089			557.8	0.18	557.8	0.052	557.8	0.061
558	0.118	558	0.162	558	0.088			558	0.18	558	0.052	558	0.061
558.2	0.118	558.2	0.161	558.2	0.088			558.2	0.18	558.2	0.052	558.2	0.061
558.4	0.117	558.4	0.161	558.4	0.088			558.4	0.179	558.4	0.052	558.4	0.061
558.6	0.117	558.6	0.16	558.6	0.088			558.6	0.179	558.6	0.051	558.6	0.061
558.8	0.117	558.8	0.16	558.8	0.087			558.8	0.179	558.8	0.051	558.8	0.061
559	0.117	559	0.159	559	0.087			559	0.179	559	0.051	559	0.061
559.2	0.117	559.2	0.159	559.2	0.087			559.2	0.179	559.2	0.051	559.2	0.061
559.4	0.117	559.4	0.159	559.4	0.087			559.4	0.179	559.4	0.051	559.4	0.06
559.6	0.117	559.6	0.158	559.6	0.087			559.6	0.179	559.6	0.051	559.6	0.06
559.8	0.117	559.8	0.158	559.8	0.087			559.8	0.179	559.8	0.051	559.8	0.06
560	0.117	560	0.157	560	0.086			560	0.179	560	0.051	560	0.06
560.2	0.117	560.2	0.157	560.2	0.086			560.2	0.179	560.2	0.05	560.2	0.06
560.4	0.117	560.4	0.156	560.4	0.086			560.4	0.179	560.4	0.05	560.4	0.06
560.6	0.117	560.6	0.156	560.6	0.086			560.6	0.178	560.6	0.05	560.6	0.06
560.8	0.117	560.8	0.155	560.8	0.086			560.8	0.178	560.8	0.05	560.8	0.06
561	0.117	561	0.155	561	0.085			561	0.178	561	0.05	561	0.059
561.2	0.117	561.2	0.154	561.2	0.085			561.2	0.178	561.2	0.05	561.2	0.059
561.4	0.117	561.4	0.154	561.4	0.085			561.4	0.178	561.4	0.05	561.4	0.059
561.6	0.117	561.6	0.154	561.6	0.085			561.6	0.178	561.6	0.05	561.6	0.059
561.8	0.117	561.8	0.153	561.8	0.085			561.8	0.178	561.8	0.05	561.8	0.059
562	0.117	562	0.153	562	0.085			562	0.178	562	0.049	562	0.059
562.2	0.117	562.2	0.152	562.2	0.084			562.2	0.178	562.2	0.049	562.2	0.059
562.4	0.117	562.4	0.152	562.4	0.084			562.4	0.178	562.4	0.049	562.4	0.059
562.6	0.117	562.6	0.152	562.6	0.084			562.6	0.178	562.6	0.049	562.6	0.058
562.8	0.117	562.8	0.151	562.8	0.084			562.8	0.178	562.8	0.049	562.8	0.058
563	0.117	563	0.151	563	0.084			563	0.178	563	0.049	563	0.058
563.2	0.117	563.2	0.15	563.2	0.083			563.2	0.177	563.2	0.049	563.2	0.058
563.4	0.117	563.4	0.15	563.4	0.083			563.4	0.177	563.4	0.049	563.4	0.058
563.6	0.117	563.6	0.149	563.6	0.083			563.6	0.177	563.6	0.048	563.6	0.058
563.8	0.117	563.8	0.149	563.8	0.083			563.8	0.177	563.8	0.048	563.8	0.058
564	0.117	564	0.149	564	0.083			564	0.177	564	0.048	564	0.057
564.2	0.117	564.2	0.148	564.2	0.083			564.2	0.177	564.2	0.048	564.2	0.057
564.4	0.117	564.4	0.148	564.4	0.083			564.4	0.177	564.4	0.048	564.4	0.057
564.6	0.117	564.6	0.148	564.6	0.082			564.6	0.177	564.6	0.048	564.6	0.057
564.8	0.117	564.8	0.147	564.8	0.082			564.8	0.177	564.8	0.048	564.8	0.057
565	0.117	565	0.147	565	0.082			565	0.177	565	0.048	565	0.057
565.2	0.117	565.2	0.146	565.2	0.082			565.2	0.177	565.2	0.048	565.2	0.057
565.4	0.117	565.4	0.146	565.4	0.082			565.4	0.177	565.4	0.047	565.4	0.056
565.6	0.117	565.6	0.145	565.6	0.081			565.6	0.176	565.6	0.047	565.6	0.056
565.8	0.117	565.8	0.145	565.8	0.081			565.8	0.176	565.8	0.047	565.8	0.056
566	0.117	566	0.145	566	0.081			566	0.176	566	0.047	566	0.056
566.2	0.117	566.2	0.144	566.2	0.081			566.2	0.176	566.2	0.047	566.2	0.056
566.4	0.117	566.4	0.144	566.4	0.081			566.4	0.176	566.4	0.047	566.4	0.056
566.6	0.117	566.6	0.144	566.6	0.081			566.6	0.176	566.6	0.047	566.6	0.056
566.8	0.117	566.8	0.143	566.8	0.08			566.8	0.176	566.8	0.046	566.8	0.055
567	0.117	567	0.143	567	0.08			567	0.176	567	0.046	567	0.055
567.2	0.117	567.2	0.143	567.2	0.08			567.2	0.175	567.2	0.046	567.2	0.055
567.4	0.117	567.4	0.142	567.4	0.08			567.4	0.175	567.4	0.046	567.4	0.055
567.6	0.117	567.6	0.142	567.6	0.08			567.6	0.175	567.6	0.046	567.6	0.055
567.8	0.117	567.8	0.142	567.8	0.08			567.8	0.175	567.8	0.046	567.8	0.055
568	0.117	568	0.141	568	0.08			568	0.175	568	0.046	568	0.055
568.2	0.118	568.2	0.141	568.2	0.08			568.2	0.175	568.2	0.046	568.2	0.055
568.4	0.118	568.4	0.141	568.4	0.079			568.4	0.175	568.4	0.046	568.4	0.055
568.6	0.118	568.6	0.14	568.6	0.079			568.6	0.175	568.6	0.046	568.6	0.055
568.8	0.118	568.8	0.14	568.8	0.079			568.8	0.175	568.8	0.045	568.8	0.054
569	0.118	569	0.14	569	0.079			569	0.175	569	0.045	569	0.054
569.2	0.118	569.2	0.139	569.2	0.078			569.2	0.175	569.2	0.045	569.2	0.054
569.4	0.118	569.4	0.139	569.4	0.078			569.4	0.175	569.4	0.045	569.4	0.054
569.6	0.118	569.6	0.139	569.6	0.078			569.6	0.175	569.6	0.045	569.6	0.054
569.8	0.118	569.8	0.138	569.8	0.078			569.8	0.175	569.8	0.045	569.8	0.054
570	0.118	570	0.138	570	0.078			570	0.174	570	0.045	570	0.054
570.2	0.118	570.2	0.138	570.2	0.077			570.2	0.174	570.2	0.045	570.2	0.053
570.4	0.118	570.4	0.137	570.4	0.077			570.4	0.174	570.4	0.045	570.4	0.053
570.6	0.119	570.6	0.137	570.6	0.077			570.6	0.174	570.6	0.044	570.6	0.053
570.8	0.119	570.8	0.137	570.8	0.077			570.8	0.174	570.8	0.044	570.8	0.053
571	0.119	571	0.137	571	0.077			571	0.174	571	0.044	571	0.053
571.2	0.119	571.2	0.136	571.2	0.077			571.2	0.174	571.2	0.044	571.2	0.053
571.4	0.119	571.4	0.136	571.4	0.077			571.4	0.173	571.4	0.044	571.4	0.053
571.6	0.119	571.6	0.136	571.6	0.076			571.6	0.173	571.6	0.044	571.6	0.053
571.8	0.119	571.8	0.136	571.8	0.076			571.8	0.173	571.8	0.044	571.8	0.052
572	0.119	572	0.135	572	0.076			572	0.173	572	0.044	572	0.052
572.2	0.12	572.2	0.135	572.2	0.076			572.2	0.173	572.2	0.043	572.2	0.052
572.4	0.12	572.4	0.135	572.4	0.076			572.4	0.173	572.4	0.043	572.4	0.052
572.6	0.12	572.6	0.134	572.6	0.076			572.6	0.173	572.6	0.043	572.6	0.052
572.8	0.12	572.8	0.134	572.8	0.075			572.8	0.173	572.8	0.043	572.8	0.052
573	0.12	573	0.134	573	0.075			573	0.173	573	0.043	573	0.052
573.2	0.12	573.2	0.133	573.2	0.075			573.2	0.173	573.2	0.043	573.2	0.052
573.4	0.121	573.4	0.133	573.4	0.075			573.4	0.172	573.4	0.043	573.4	0.052
573.6	0.121	573.6	0.133	573.6	0.075			573.6	0.172	573.6	0.043	573.6	0.051
573.8	0.121	573.8	0.133	573.8	0.075			573.8	0.172	573.8	0.043	573.8	0.051
574	0.121	574	0.132	574	0.074			574	0.172	574	0.043	574	0.051
574.2	0.121	574.2	0.132	574.2	0.074			574.2	0.172	574.2	0.043	574.2	0.051
574.4	0.122	574.4	0.132	574.4	0.074			574.4	0.172	574.4	0.042	574.4	0.051
574.6	0.122	574.6	0.131	574.6	0.074			574.6	0.172	574.6	0.042	574.6	0.051
574.8	0.122	574.8	0.131	574.8	0.074			574.8	0.172	574.8	0.042	574.8	0.051
575	0.122	575	0.131	575	0.074			575	0.172	575	0.042	575	0.051
575.2	0.122	575.2	0.13	575.2	0.074			575.2	0.172	575.2	0.042	575.2	0.051
575.4	0.123	575.4	0.13	575.4	0.073			575.4	0.171	575.4	0.042	575.4	0.05
575.6	0.123	575.6	0.13	575.6	0.073			575.6	0.171	575.6	0.042	575.6	0.05
575.8	0.123	575.8	0.129	575.8	0.073			575.8	0.171	575.8	0.042	575.8	0.05
576	0.123	576	0.129	576	0.073			576	0.171	576	0.042	576	0.05
576.2	0.124	576.2	0.129	576.2	0.073			576.2	0.171	576.2	0.041	576.2	0.05
576.4	0.124	576.4	0.128	576.4	0.073			576.4	0.171	576.4	0.041	576.4	0.05
576.6	0.124	576.6	0.128	576.6	0.072			576.6	0.171	576.6	0.041	576.6	0.05
576.8	0.124	576.8	0.128	576.8	0.072			576.8	0.17	576.8	0.041	576.8	0.05
577	0.124	577	0.127	577	0.072			577	0.17	577	0.041	577	0.05
577.2	0.125	577.2	0.127	577.2	0.072			577.2	0.17	577.2	0.041	577.2	0.05
577.4	0.125	577.4	0.127	577.4	0.072			577.4	0.17	577.4	0.041	577.4	0.049
577.6	0.125	577.6	0.126	577.6	0.072			577.6	0.17	577.6	0.041	577.6	0.049
577.8	0.126	577.8	0.126	577.8	0.071			577.8	0.17	577.8	0.041	577.8	0.049
578	0.126	578	0.126	578	0.071			578	0.17	578	0.041	578	0.049
578.2	0.126	578.2	0.125	578.2	0.071			578.2	0.17	578.2	0.04	578.2	0.049
578.4	0.126	578.4	0.125	578.4	0.071			578.4	0.17	578.4	0.04	578.4	0.049
578.6	0.127	578.6	0.125	578.6	0.071			578.6	0.169	578.6	0.04	578.6	0.049
578.8	0.127	578.8	0.124	578.8	0.071			578.8	0.169	578.8	0.04	578.8	0.049
579	0.127	579	0.124	579	0.071			579	0.169	579	0.04	579	0.049
579.2	0.128	579.2	0.124	579.2	0.07			579.2	0.169	579.2	0.04	579.2	0.048
579.4	0.128	579.4	0.123	579.4	0.07			579.4	0.169	579.4	0.04	579.4	0.048
579.6	0.128	579.6	0.123	579.6	0.07			579.6	0.169	579.6	0.04	579.6	0.048
579.8	0.128	579.8	0.123	579.8	0.07			579.8	0.169	579.8	0.04	579.8	0.048
580	0.129	580	0.122	580	0.07			580	0.168	580	0.04	580	0.048
580.2	0.129	580.2	0.122	580.2	0.07			580.2	0.168	580.2	0.04	580.2	0.048
580.4	0.129	580.4	0.122	580.4	0.07			580.4	0.168	580.4	0.04	580.4	0.048
580.6	0.129	580.6	0.122	580.6	0.07			580.6	0.168	580.6	0.04	580.6	0.048
580.8	0.13	580.8	0.121	580.8	0.069			580.8	0.168	580.8	0.039	580.8	0.048
581	0.13	581	0.121	581	0.069			581	0.168	581	0.039	581	0.048
581.2	0.13	581.2	0.121	581.2	0.069			581.2	0.168	581.2	0.039	581.2	0.048
581.4	0.131	581.4	0.12	581.4	0.069			581.4	0.167	581.4	0.039	581.4	0.048
581.6	0.131	581.6	0.12	581.6	0.069			581.6	0.167	581.6	0.039	581.6	0.047
581.8	0.131	581.8	0.12	581.8	0.069			581.8	0.167	581.8	0.039	581.8	0.047
582	0.131	582	0.12	582	0.069			582	0.167	582	0.039	582	0.047
582.2	0.132	582.2	0.119	582.2	0.069			582.2	0.167	582.2	0.039	582.2	0.047
582.4	0.132	582.4	0.119	582.4	0.068			582.4	0.167	582.4	0.039	582.4	0.047
582.6	0.132	582.6	0.119	582.6	0.068			582.6	0.167	582.6	0.039	582.6	0.047
582.8	0.133	582.8	0.119	582.8	0.068			582.8	0.166	582.8	0.038	582.8	0.047
583	0.133	583	0.118	583	0.068			583	0.166	583	0.038	583	0.047
583.2	0.133	583.2	0.118	583.2	0.068			583.2	0.166	583.2	0.038	583.2	0.047
583.4	0.134	583.4	0.118	583.4	0.068			583.4	0.166	583.4	0.038	583.4	0.047
583.6	0.134	583.6	0.117	583.6	0.068			583.6	0.166	583.6	0.038	583.6	0.046
583.8	0.134	583.8	0.117	583.8	0.067			583.8	0.165	583.8	0.038	583.8	0.046
584	0.134	584	0.117	584	0.067			584	0.165	584	0.038	584	0.046
584.2	0.135	584.2	0.117	584.2	0.067			584.2	0.165	584.2	0.038	584.2	0.046
584.4	0.135	584.4	0.117	584.4	0.067			584.4	0.165	584.4	0.038	584.4	0.046
584.6	0.135	584.6	0.116	584.6	0.067			584.6	0.165	584.6	0.038	584.6	0.046
584.8	0.135	584.8	0.116	584.8	0.067			584.8	0.165	584.8	0.038	584.8	0.046
585	0.136	585	0.116	585	0.066			585	0.165	585	0.038	585	0.046
585.2	0.136	585.2	0.116	585.2	0.066			585.2	0.165	585.2	0.038	585.2	0.046
585.4	0.136	585.4	0.115	585.4	0.066			585.4	0.164	585.4	0.038	585.4	0.046
585.6	0.137	585.6	0.115	585.6	0.066			585.6	0.164	585.6	0.038	585.6	0.046
585.8	0.137	585.8	0.115	585.8	0.066			585.8	0.164	585.8	0.038	585.8	0.046
586	0.137	586	0.115	586	0.066			586	0.164	586	0.038	586	0.045
586.2	0.138	586.2	0.114	586.2	0.066			586.2	0.164	586.2	0.038	586.2	0.045
586.4	0.138	586.4	0.114	586.4	0.065			586.4	0.164	586.4	0.037	586.4	0.045
586.6	0.138	586.6	0.114	586.6	0.065			586.6	0.163	586.6	0.037	586.6	0.045
586.8	0.138	586.8	0.113	586.8	0.065			586.8	0.163	586.8	0.037	586.8	0.045
587	0.138	587	0.113	587	0.065			587	0.163	587	0.037	587	0.045
587.2	0.139	587.2	0.113	587.2	0.065			587.2	0.163	587.2	0.037	587.2	0.045
587.4	0.139	587.4	0.113	587.4	0.065			587.4	0.163	587.4	0.037	587.4	0.045
587.6	0.139	587.6	0.112	587.6	0.064			587.6	0.163	587.6	0.037	587.6	0.045
587.8	0.139	587.8	0.112	587.8	0.064			587.8	0.162	587.8	0.037	587.8	0.045
588	0.14	588	0.112	588	0.064			588	0.162	588	0.037	588	0.045
588.2	0.14	588.2	0.112	588.2	0.064			588.2	0.162	588.2	0.037	588.2	0.044
588.4	0.14	588.4	0.111	588.4	0.064			588.4	0.162	588.4	0.037	588.4	0.044
588.6	0.14	588.6	0.111	588.6	0.064			588.6	0.162	588.6	0.037	588.6	0.044
588.8	0.14	588.8	0.111	588.8	0.063			588.8	0.162	588.8	0.037	588.8	0.044
589	0.141	589	0.111	589	0.063			589	0.162	589	0.037	589	0.044
589.2	0.141	589.2	0.11	589.2	0.063			589.2	0.162	589.2	0.037	589.2	0.044
589.4	0.141	589.4	0.11	589.4	0.063			589.4	0.161	589.4	0.036	589.4	0.044
589.6	0.141	589.6	0.11	589.6	0.063			589.6	0.161	589.6	0.036	589.6	0.044
589.8	0.141	589.8	0.109	589.8	0.063			589.8	0.161	589.8	0.036	589.8	0.044
590	0.141	590	0.109	590	0.062			590	0.161	590	0.036	590	0.044
590.2	0.141	590.2	0.109	590.2	0.062			590.2	0.161	590.2	0.036	590.2	0.044
590.4	0.141	590.4	0.109	590.4	0.062			590.4	0.161	590.4	0.036	590.4	0.044
590.6	0.141	590.6	0.109	590.6	0.062			590.6	0.16	590.6	0.036	590.6	0.044
590.8	0.142	590.8	0.108	590.8	0.062			590.8	0.16	590.8	0.036	590.8	0.043
591	0.142	591	0.108	591	0.062			591	0.16	591	0.036	591	0.043
591.2	0.142	591.2	0.108	591.2	0.062			591.2	0.16	591.2	0.036	591.2	0.043
591.4	0.142	591.4	0.108	591.4	0.061			591.4	0.16	591.4	0.036	591.4	0.043
591.6	0.142	591.6	0.107	591.6	0.061			591.6	0.159	591.6	0.036	591.6	0.043
591.8	0.142	591.8	0.107	591.8	0.061			591.8	0.159	591.8	0.036	591.8	0.043
592	0.142	592	0.107	592	0.061			592	0.159	592	0.036	592	0.043
592.2	0.143	592.2	0.107	592.2	0.061			592.2	0.159	592.2	0.036	592.2	0.043
592.4	0.143	592.4	0.106	592.4	0.061			592.4	0.159	592.4	0.035	592.4	0.043
592.6	0.143	592.6	0.106	592.6	0.061			592.6	0.158	592.6	0.035	592.6	0.043
592.8	0.143	592.8	0.106	592.8	0.061			592.8	0.158	592.8	0.035	592.8	0.043
593	0.143	593	0.106	593	0.06			593	0.158	593	0.035	593	0.042
593.2	0.143	593.2	0.106	593.2	0.06			593.2	0.158	593.2	0.035	593.2	0.042
593.4	0.143	593.4	0.105	593.4	0.06			593.4	0.158	593.4	0.035	593.4	0.042
593.6	0.143	593.6	0.105	593.6	0.06			593.6	0.158	593.6	0.035	593.6	0.042
593.8	0.143	593.8	0.105	593.8	0.06			593.8	0.158	593.8	0.035	593.8	0.042
594	0.143	594	0.105	594	0.06			594	0.157	594	0.035	594	0.042
594.2	0.143	594.2	0.105	594.2	0.06			594.2	0.157	594.2	0.035	594.2	0.042
594.4	0.144	594.4	0.104	594.4	0.059			594.4	0.157	594.4	0.035	594.4	0.042
594.6	0.144	594.6	0.104	594.6	0.059			594.6	0.157	594.6	0.035	594.6	0.042
594.8	0.144	594.8	0.104	594.8	0.059			594.8	0.157	594.8	0.034	594.8	0.042
595	0.144	595	0.104	595	0.059			595	0.157	595	0.034	595	0.041
595.2	0.144	595.2	0.103	595.2	0.059			595.2	0.156	595.2	0.034	595.2	0.041
595.4	0.144	595.4	0.103	595.4	0.058			595.4	0.156	595.4	0.034	595.4	0.041
595.6	0.144	595.6	0.103	595.6	0.058			595.6	0.156	595.6	0.034	595.6	0.041
595.8	0.144	595.8	0.102	595.8	0.058			595.8	0.156	595.8	0.034	595.8	0.041
596	0.144	596	0.102	596	0.058			596	0.156	596	0.034	596	0.041
596.2	0.144	596.2	0.102	596.2	0.058			596.2	0.156	596.2	0.034	596.2	0.041
596.4	0.144	596.4	0.102	596.4	0.058			596.4	0.155	596.4	0.034	596.4	0.041
596.6	0.144	596.6	0.102	596.6	0.058			596.6	0.155	596.6	0.034	596.6	0.041
596.8	0.144	596.8	0.101	596.8	0.057			596.8	0.155	596.8	0.034	596.8	0.041
597	0.144	597	0.101	597	0.057			597	0.155	597	0.034	597	0.041
597.2	0.144	597.2	0.101	597.2	0.057			597.2	0.155	597.2	0.033	597.2	0.041
597.4	0.144	597.4	0.101	597.4	0.057			597.4	0.155	597.4	0.033	597.4	0.041
597.6	0.144	597.6	0.1	597.6	0.057			597.6	0.154	597.6	0.033	597.6	0.041
597.8	0.144	597.8	0.1	597.8	0.057			597.8	0.154	597.8	0.033	597.8	0.041
598	0.145	598	0.1	598	0.057			598	0.154	598	0.033	598	0.04
598.2	0.145	598.2	0.1	598.2	0.057			598.2	0.154	598.2	0.033	598.2	0.04
598.4	0.145	598.4	0.1	598.4	0.056			598.4	0.154	598.4	0.033	598.4	0.04
598.6	0.145	598.6	0.1	598.6	0.056			598.6	0.154	598.6	0.033	598.6	0.04
598.8	0.145	598.8	0.099	598.8	0.056			598.8	0.154	598.8	0.033	598.8	0.04
599	0.145	599	0.099	599	0.056			599	0.153	599	0.033	599	0.04
599.2	0.145	599.2	0.099	599.2	0.056			599.2	0.153	599.2	0.033	599.2	0.04
599.4	0.145	599.4	0.099	599.4	0.056			599.4	0.153	599.4	0.033	599.4	0.04
599.6	0.145	599.6	0.098	599.6	0.055			599.6	0.153	599.6	0.032	599.6	0.039
599.8	0.145	599.8	0.098	599.8	0.055			599.8	0.153	599.8	0.032	599.8	0.039
600	0.145	600	0.098	600	0.055			600	0.153	600	0.032	600	0.039

## Sheet: Time
OLE
5min		15min		30min		60min		120min		180min		24h
Wavelength nm.	Abs.	Wavelength nm.	Abs.	Wavelength nm.	Abs.	Wavelength nm.	Abs.	Wavelength nm.	Abs.	Wavelength nm.	Abs.	Wavelength nm.	Abs.
200	3.914	200	3.914	200	3.914	200	3.818	200	3.738	200	3.818	200	5
200.5	3.866	200.5	3.914	200.5	3.914	200.5	3.778	200.5	3.826	200.5	3.866	200.5	5
201	3.866	201	3.914	201	3.914	201	3.826	201	3.866	201	3.866	201	5
201.5	4.016	201.5	3.889	201.5	3.943	201.5	4.016	201.5	3.968	201.5	3.841	201.5	5
202	3.991	202	3.864	202	3.918	202	4.045	202	4.045	202	3.864	202	5
202.5	3.991	202.5	3.991	202.5	3.889	202.5	4.156	202.5	4.005	202.5	3.951	202.5	5
203	3.991	203	4.045	203	3.976	203	4.156	203	4.005	203	3.951	203	5
203.5	3.864	203.5	3.874	203.5	3.976	203.5	4.045	203.5	3.972	203.5	3.951	203.5	5
204	3.889	204	3.845	204	3.976	204	4.167	204	4.005	204	3.976	204	5
[truncated: 792 more rows]
